# Supplementary material
Source: publisher figshare collection journal article supplement (https://acs.figshare.com/ndownloader/files/3617988)
Supplement: Supplementary file 1 [file 3617988]

 
data_solve_2
 
_audit_creation_method            SHELXL-2013
_chemical_name_systematic
;
 ?
;
_chemical_name_common             ?
_chemical_melting_point           'not determined'
_chemical_formula_moiety          'C27 H22 Mn N4 O5 Rh'
_chemical_formula_sum
 'C27 H22 Mn N4 O5 Rh' 
_chemical_formula_weight          640.33

loop_
 _atom_type_symbol
 _atom_type_description
 _atom_type_scat_dispersion_real
 _atom_type_scat_dispersion_imag
 _atom_type_scat_source
 'C'  'C'   0.0033   0.0016
 'International Tables Vol C Tables 4.2.6.8 and 6.1.1.4'
 'H'  'H'   0.0000   0.0000
 'International Tables Vol C Tables 4.2.6.8 and 6.1.1.4'
 'N'  'N'   0.0061   0.0033
 'International Tables Vol C Tables 4.2.6.8 and 6.1.1.4'
 'O'  'O'   0.0106   0.0060
 'International Tables Vol C Tables 4.2.6.8 and 6.1.1.4'
 'Mn'  'Mn'   0.3368   0.7283
 'International Tables Vol C Tables 4.2.6.8 and 6.1.1.4'
 'Rh'  'Rh'  -1.1178   0.9187
 'International Tables Vol C Tables 4.2.6.8 and 6.1.1.4'
 
_space_group_crystal_system       triclinic
_space_group_IT_number            2
_space_group_name_H-M_alt         'P -1'
_space_group_name_Hall            '-P 1'
 
_shelx_space_group_comment
;
The symmetry employed for this shelxl refinement is uniquely defined
by the following loop, which should always be used as a source of
symmetry information in preference to the above space-group names.
They are only intended as comments.
;
 
loop_
 _space_group_symop_operation_xyz
 'x, y, z'
 '-x, -y, -z'
 
_cell_length_a                    10.7295(7)
_cell_length_b                    11.5936(7)
_cell_length_c                    12.5401(13)
_cell_angle_alpha                 98.187(2)
_cell_angle_beta                  111.431(2)
_cell_angle_gamma                 113.2530(10)
_cell_volume                      1256.93(17)
_cell_formula_units_Z             2
_cell_measurement_temperature     100(2)
_cell_measurement_reflns_used     9917
_cell_measurement_theta_min       2.202 
_cell_measurement_theta_max       27.869 
 
_exptl_crystal_description        'prism' 
_exptl_crystal_colour             'black-green' 
_exptl_crystal_density_meas       ? 
_exptl_crystal_density_method     ?              
_exptl_crystal_density_diffrn     1.692          
_exptl_crystal_F_000              644
_exptl_transmission_factor_min    ?                                             
_exptl_transmission_factor_max    ?                                             
_exptl_crystal_size_max           0.280
_exptl_crystal_size_mid           0.200
_exptl_crystal_size_min           0.150
_exptl_absorpt_coefficient_mu     1.205
_shelx_estimated_absorpt_T_min    0.729
_shelx_estimated_absorpt_T_max    0.840
_exptl_absorpt_correction_type    multi-scan 
_exptl_absorpt_correction_T_min   0.7289 
_exptl_absorpt_correction_T_max   0.8399 
_exptl_absorpt_process_details    

;
5957 Corrected reflections written to file twin4.hkl
 Reflections merged according to point-group -1    
 Minimum and maximum apparent transmission:  0.681501  0.745622
 Additional spherical absorption correction applied with mu*r =  0.2000

 HKLF 5 dataset constructed from all observations involving domain 2
    8021 Corrected reflections written to file twin5.hkl
 Reflections merged according to point-group -1    
 Single reflections that also occur in composites omitted
 Minimum and maximum apparent transmission:  0.679403  0.745622
 Additional spherical absorption correction applied with mu*r =  0.2000
;
 
_exptl_special_details
;
 These crystals grew as non-merohedral twins, appearing as fused 
parallelogram crystals. Attempts to separate them by cutting or 
pressing with a dissecting probe resulted in the crystal crushing
to small fragments, and powder rings in initial frames. As a result,
a two-component twin was selected, mounted on a glass fiber with
paratone-N oil, and collected in phi and omega scans. The crystal was
indexed with CELLNOW with a 24 angstrom axis limit to give the correct
cell, and a second domain rotated 180 degrees.

Rotated from first domain by 179.9 degrees about
 reciprocal axis -0.998  0.002  1.000  and real axis  1.000  0.037 -0.775

 Twin law to convert hkl from first to      0.125   0.042  -0.872
 this domain (SHELXL TWIN matrix):         -0.005  -1.000   0.003
                                           -1.129  -0.040  -0.125
;
 
_diffrn_ambient_temperature       100(2)
_diffrn_radiation_wavelength      0.71073
_diffrn_radiation_type            MoK\a
_diffrn_source                    ?                       
_diffrn_measurement_device_type   ? 
_diffrn_measurement_method        ? 
_diffrn_detector_area_resol_mean  ? 
_diffrn_reflns_number             5848
_diffrn_reflns_av_unetI/netI      0.0234
_diffrn_reflns_av_R_equivalents   ?
_diffrn_reflns_limit_h_min        -13
_diffrn_reflns_limit_h_max        14
_diffrn_reflns_limit_k_min        -13
_diffrn_reflns_limit_k_max        15
_diffrn_reflns_limit_l_min        -13
_diffrn_reflns_limit_l_max        16
_diffrn_reflns_theta_min          1.852
_diffrn_reflns_theta_max          27.925
_diffrn_reflns_theta_full         25.242
_diffrn_measured_fraction_theta_max   0.981
_diffrn_measured_fraction_theta_full  0.995
_diffrn_reflns_Laue_measured_fraction_max    0.981
_diffrn_reflns_Laue_measured_fraction_full   0.995
_diffrn_reflns_point_group_measured_fraction_max   0.981
_diffrn_reflns_point_group_measured_fraction_full  0.995
_reflns_number_total              5848
_reflns_number_gt                 5358
_reflns_threshold_expression      'I > 2\s(I)'
_reflns_Friedel_coverage          0.000
_reflns_Friedel_fraction_max      .
_reflns_Friedel_fraction_full     .
 
_reflns_special_details
;
 _reflns_Friedel_fraction is defined as the number of unique
 Friedel pairs measured divided by the number that would be
 possible theoretically, ignoring centric projections and
 systematic absences.
;
 
_computing_data_collection        'COSMO (Bruker AXS)' 
_computing_cell_refinement        'CELLNOW, SAINT (Bruker AXS)' 
_computing_data_reduction         'TWINABS (Bruker AXS)' 
_computing_structure_solution     'SHELXS-97 (Sheldrick, 2008)' 
_computing_structure_refinement   'SHELXL-2013 (Sheldrick, 2013)'
_computing_molecular_graphics     'Mercury (CCDC)' 
_computing_publication_material   'APEX2 (Bruker AXS)' 
 
_refine_special_details
;
 Refined as a 2-component twin.
;
_refine_ls_structure_factor_coef  Fsqd
_refine_ls_matrix_type            full
_refine_ls_weighting_scheme       calc
_refine_ls_weighting_details
'w=1/[\s^2^(Fo^2^)+(0.0269P)^2^+0.3603P] where P=(Fo^2^+2Fc^2^)/3'
_atom_sites_solution_primary      ?
_atom_sites_solution_secondary    ?
_atom_sites_solution_hydrogens    geom
_refine_ls_hydrogen_treatment     constr
_refine_ls_extinction_method      none
_refine_ls_extinction_coef        .
_refine_ls_number_reflns          5848
_refine_ls_number_parameters      348
_refine_ls_number_restraints      0
_refine_ls_R_factor_all           0.0274
_refine_ls_R_factor_gt            0.0226
_refine_ls_wR_factor_ref          0.0538
_refine_ls_wR_factor_gt           0.0518
_refine_ls_goodness_of_fit_ref    1.060
_refine_ls_restrained_S_all       1.060
_refine_ls_shift/su_max           0.001
_refine_ls_shift/su_mean          0.000
 
loop_
 _atom_site_label
 _atom_site_type_symbol
 _atom_site_fract_x
 _atom_site_fract_y
 _atom_site_fract_z
 _atom_site_U_iso_or_equiv
 _atom_site_adp_type
 _atom_site_occupancy
 _atom_site_site_symmetry_order  
 _atom_site_calc_flag
 _atom_site_refinement_flags_posn
 _atom_site_refinement_flags_adp
 _atom_site_refinement_flags_occupancy
 _atom_site_disorder_assembly
 _atom_site_disorder_group
Mn1 Mn 0.53964(4) 0.25484(4) 0.11822(3) 0.01487(7) Uani 1 1 d . . . . .
Rh2 Rh 0.48424(2) 0.25600(2) 0.31260(2) 0.01103(4) Uani 1 1 d . . . . .
N1 N 0.2571(2) 0.17844(17) 0.22244(16) 0.0148(4) Uani 1 1 d . . . . .
N2 N 0.4848(2) 0.08691(17) 0.33002(16) 0.0125(3) Uani 1 1 d . . . . .
N3 N 0.70180(19) 0.33540(16) 0.43852(16) 0.0127(3) Uani 1 1 d . . . . .
N4 N 0.4763(2) 0.42671(17) 0.32216(16) 0.0138(3) Uani 1 1 d . . . . .
O1 O 0.3072(2) 0.32235(19) -0.03446(17) 0.0305(4) Uani 1 1 d . . . . .
O2 O 0.75847(19) 0.54632(17) 0.25414(16) 0.0263(4) Uani 1 1 d . . . . .
O3 O 0.30193(18) -0.02907(16) 0.04361(14) 0.0219(3) Uani 1 1 d . . . . .
O4 O 0.78645(19) 0.18022(17) 0.21224(15) 0.0238(4) Uani 1 1 d . . . . .
O5 O 0.5940(2) 0.23714(19) -0.09607(15) 0.0302(4) Uani 1 1 d . . . . .
C01 C 0.3911(3) 0.2972(2) 0.0309(2) 0.0200(4) Uani 1 1 d . . . . .
C1 C 0.1627(2) 0.0598(2) 0.2207(2) 0.0164(4) Uani 1 1 d . . . . .
C1' C 0.5878(2) 0.5409(2) 0.41209(19) 0.0147(4) Uani 1 1 d . . . . .
C02 C 0.6757(3) 0.4355(2) 0.2049(2) 0.0196(4) Uani 1 1 d . . . . .
C2 C 0.2119(3) -0.0304(2) 0.2576(2) 0.0166(4) Uani 1 1 d . . . . .
H2A H 0.1316 -0.1130 0.2467 0.020 Uiso 1 1 calc R U . . .
C2' C 0.7223(2) 0.5515(2) 0.5006(2) 0.0155(4) Uani 1 1 d . . . . .
H2'A H 0.7899 0.6376 0.5604 0.019 Uiso 1 1 calc R U . . .
C3 C 0.3574(2) -0.0217(2) 0.30741(19) 0.0140(4) Uani 1 1 d . . . . .
C03 C 0.3917(2) 0.0795(2) 0.07514(19) 0.0182(4) Uani 1 1 d . . . . .
C3' C 0.7761(2) 0.4594(2) 0.51778(19) 0.0147(4) Uani 1 1 d . . . . .
C04 C 0.6931(2) 0.2097(2) 0.18424(19) 0.0180(4) Uani 1 1 d . . . . .
C4 C -0.0039(3) 0.0157(2) 0.1872(2) 0.0250(5) Uani 1 1 d . . . . .
H4A H -0.0152 0.0938 0.2112 0.037 Uiso 1 1 calc R U . . .
H4B H -0.0373 -0.0455 0.2296 0.037 Uiso 1 1 calc R U . . .
H4C H -0.0669 -0.0296 0.0992 0.037 Uiso 1 1 calc R U . . .
C4' C 0.5756(3) 0.6675(2) 0.4311(2) 0.0181(4) Uani 1 1 d . . . . .
H4'A H 0.4719 0.6455 0.4178 0.027 Uiso 1 1 calc R U . . .
H4'B H 0.5975 0.7104 0.3734 0.027 Uiso 1 1 calc R U . . .
H4'C H 0.6497 0.7284 0.5143 0.027 Uiso 1 1 calc R U . . .
C05 C 0.5731(3) 0.2441(2) -0.0125(2) 0.0195(4) Uani 1 1 d . . . . .
C5 C 0.3589(3) -0.1421(2) 0.3406(2) 0.0175(4) Uani 1 1 d . . . . .
H5A H 0.4531 -0.1130 0.4152 0.026 Uiso 1 1 calc R U . . .
H5B H 0.3543 -0.2025 0.2743 0.026 Uiso 1 1 calc R U . . .
H5C H 0.2701 -0.1887 0.3538 0.026 Uiso 1 1 calc R U . . .
C5' C 0.9185(3) 0.5077(2) 0.6373(2) 0.0196(5) Uani 1 1 d . . . . .
H5'A H 0.9143 0.4324 0.6656 0.029 Uiso 1 1 calc R U . . .
H5'B H 0.9234 0.5750 0.6981 0.029 Uiso 1 1 calc R U . . .
H5'C H 1.0096 0.5470 0.6253 0.029 Uiso 1 1 calc R U . . .
C7 C 0.7530(2) 0.2392(2) 0.44716(19) 0.0129(4) Uani 1 1 d . . . . .
C8 C 0.9061(2) 0.2686(2) 0.4998(2) 0.0171(4) Uani 1 1 d . . . . .
H8A H 0.9852 0.3587 0.5409 0.021 Uiso 1 1 calc R U . . .
C9 C 0.9433(3) 0.1666(2) 0.4924(2) 0.0230(5) Uani 1 1 d . . . . .
H9A H 1.0474 0.1868 0.5303 0.028 Uiso 1 1 calc R U . . .
C10 C 0.8292(3) 0.0361(2) 0.4301(2) 0.0243(5) Uani 1 1 d . . . . .
H10A H 0.8552 -0.0332 0.4245 0.029 Uiso 1 1 calc R U . . .
C11 C 0.6764(3) 0.0050(2) 0.3754(2) 0.0185(4) Uani 1 1 d . . . . .
H11A H 0.5990 -0.0851 0.3308 0.022 Uiso 1 1 calc R U . . .
C12 C 0.6355(2) 0.1051(2) 0.38524(19) 0.0139(4) Uani 1 1 d . . . . .
C13 C 0.3337(2) 0.4058(2) 0.2340(2) 0.0157(4) Uani 1 1 d . . . . .
C14 C 0.3055(3) 0.5008(2) 0.1880(2) 0.0209(5) Uani 1 1 d . . . . .
H14A H 0.3849 0.5907 0.2207 0.025 Uiso 1 1 calc R U . . .
C15 C 0.1630(3) 0.4655(2) 0.0951(2) 0.0252(5) Uani 1 1 d . . . . .
H15A H 0.1454 0.5317 0.0658 0.030 Uiso 1 1 calc R U . . .
C16 C 0.0465(3) 0.3348(2) 0.0449(2) 0.0247(5) Uani 1 1 d . . . . .
H16A H -0.0511 0.3113 -0.0178 0.030 Uiso 1 1 calc R U . . .
C17 C 0.0734(3) 0.2380(2) 0.0868(2) 0.0207(5) Uani 1 1 d . . . . .
H17A H -0.0056 0.1478 0.0503 0.025 Uiso 1 1 calc R U . . .
C18 C 0.2137(3) 0.2710(2) 0.1809(2) 0.0157(4) Uani 1 1 d . . . . .
 
loop_
 _atom_site_aniso_label
 _atom_site_aniso_U_11
 _atom_site_aniso_U_22
 _atom_site_aniso_U_33
 _atom_site_aniso_U_23
 _atom_site_aniso_U_13
 _atom_site_aniso_U_12
Mn1 0.01413(15) 0.01641(16) 0.01368(17) 0.00453(13) 0.00559(14) 0.00800(13)
Rh2 0.00915(7) 0.00945(7) 0.01262(9) 0.00276(6) 0.00363(7) 0.00445(6)
N1 0.0118(9) 0.0129(9) 0.0174(9) 0.0023(7) 0.0052(8) 0.0064(8)
N2 0.0125(9) 0.0127(8) 0.0115(8) 0.0037(7) 0.0049(7) 0.0059(7)
N3 0.0117(9) 0.0117(8) 0.0136(9) 0.0041(7) 0.0051(7) 0.0055(7)
N4 0.0117(9) 0.0120(8) 0.0165(9) 0.0046(7) 0.0054(8) 0.0059(7)
O1 0.0295(10) 0.0376(11) 0.0277(9) 0.0130(8) 0.0090(8) 0.0224(9)
O2 0.0221(9) 0.0203(9) 0.0271(9) 0.0038(7) 0.0084(8) 0.0061(8)
O3 0.0191(8) 0.0178(8) 0.0202(8) 0.0024(6) 0.0064(7) 0.0051(7)
O4 0.0219(9) 0.0314(10) 0.0215(9) 0.0083(7) 0.0091(7) 0.0169(8)
O5 0.0425(10) 0.0328(9) 0.0244(9) 0.0133(8) 0.0211(8) 0.0200(8)
C01 0.0200(12) 0.0216(11) 0.0178(11) 0.0050(9) 0.0089(10) 0.0100(10)
C1 0.0127(11) 0.0148(10) 0.0171(10) 0.0006(8) 0.0060(9) 0.0051(9)
C1' 0.0155(10) 0.0109(10) 0.0182(10) 0.0045(8) 0.0095(9) 0.0053(9)
C02 0.0199(11) 0.0263(13) 0.0165(10) 0.0084(9) 0.0085(9) 0.0142(11)
C2 0.0146(11) 0.0119(10) 0.0186(11) 0.0023(8) 0.0074(9) 0.0034(9)
C2' 0.0134(10) 0.0108(10) 0.0171(10) 0.0029(8) 0.0057(9) 0.0032(9)
C3 0.0172(11) 0.0124(10) 0.0106(10) 0.0032(8) 0.0062(9) 0.0060(9)
C03 0.0173(11) 0.0261(12) 0.0143(10) 0.0076(9) 0.0066(9) 0.0138(10)
C3' 0.0106(10) 0.0152(10) 0.0141(10) 0.0045(8) 0.0046(9) 0.0038(9)
C04 0.0180(11) 0.0187(11) 0.0130(10) 0.0023(8) 0.0071(9) 0.0061(9)
C4 0.0146(12) 0.0195(12) 0.0385(15) 0.0086(10) 0.0115(11) 0.0073(10)
C4' 0.0195(11) 0.0124(10) 0.0193(11) 0.0022(8) 0.0060(9) 0.0086(9)
C05 0.0195(10) 0.0192(10) 0.0196(11) 0.0078(9) 0.0084(9) 0.0094(9)
C5 0.0204(11) 0.0136(10) 0.0199(11) 0.0069(9) 0.0108(10) 0.0078(9)
C5' 0.0160(11) 0.0149(11) 0.0184(11) 0.0036(9) 0.0030(10) 0.0041(10)
C7 0.0144(11) 0.0157(10) 0.0128(10) 0.0078(8) 0.0070(9) 0.0093(9)
C8 0.0142(11) 0.0166(10) 0.0192(11) 0.0072(9) 0.0061(9) 0.0073(9)
C9 0.0148(11) 0.0245(12) 0.0302(13) 0.0111(10) 0.0067(10) 0.0126(10)
C10 0.0234(13) 0.0232(12) 0.0350(14) 0.0160(11) 0.0132(11) 0.0172(11)
C11 0.0175(11) 0.0154(10) 0.0230(12) 0.0077(9) 0.0083(10) 0.0087(9)
C12 0.0134(10) 0.0156(10) 0.0126(10) 0.0056(8) 0.0051(9) 0.0077(9)
C13 0.0146(10) 0.0142(10) 0.0169(10) 0.0020(8) 0.0056(9) 0.0081(9)
C14 0.0213(12) 0.0159(11) 0.0240(12) 0.0058(9) 0.0068(10) 0.0113(10)
C15 0.0242(13) 0.0221(12) 0.0295(13) 0.0090(10) 0.0060(11) 0.0170(11)
C16 0.0182(12) 0.0264(13) 0.0249(12) 0.0045(10) 0.0021(10) 0.0151(11)
C17 0.0138(11) 0.0188(11) 0.0220(12) 0.0015(9) 0.0033(9) 0.0076(9)
C18 0.0118(11) 0.0149(11) 0.0197(12) 0.0041(9) 0.0068(9) 0.0068(9)
 
_geom_special_details
;
 All esds (except the esd in the dihedral angle between two l.s. planes)
 are estimated using the full covariance matrix.  The cell esds are taken
 into account individually in the estimation of esds in distances, angles
 and torsion angles; correlations between esds in cell parameters are only
 used when they are defined by crystal symmetry.  An approximate (isotropic)
 treatment of cell esds is used for estimating esds involving l.s. planes.
;
 
loop_
 _geom_bond_atom_site_label_1
 _geom_bond_atom_site_label_2
 _geom_bond_distance
 _geom_bond_site_symmetry_2
 _geom_bond_publ_flag
Mn1 C05 1.800(2) . ?
Mn1 C03 1.859(2) . ?
Mn1 C01 1.864(2) . ?
Mn1 C02 1.865(2) . ?
Mn1 C04 1.865(2) . ?
Mn1 Rh2 2.7113(4) . ?
Rh2 N3 1.9964(17) . ?
Rh2 N1 1.9978(18) . ?
Rh2 N4 2.0027(16) . ?
Rh2 N2 2.0052(16) . ?
N1 C1 1.339(3) . ?
N1 C18 1.420(3) . ?
N2 C3 1.338(3) . ?
N2 C12 1.417(3) . ?
N3 C3' 1.342(3) . ?
N3 C7 1.426(2) . ?
N4 C1' 1.339(3) . ?
N4 C13 1.420(3) . ?
O1 C01 1.142(3) . ?
O2 C02 1.137(3) . ?
O3 C03 1.137(3) . ?
O4 C04 1.136(3) . ?
O5 C05 1.147(2) . ?
C1 C2 1.408(3) . ?
C1 C4 1.518(3) . ?
C1' C2' 1.407(3) . ?
C1' C4' 1.517(3) . ?
C2 C3 1.408(3) . ?
C2' C3' 1.407(3) . ?
C3 C5 1.517(3) . ?
C3' C5' 1.519(3) . ?
C7 C8 1.397(3) . ?
C7 C12 1.415(3) . ?
C8 C9 1.392(3) . ?
C9 C10 1.378(3) . ?
C10 C11 1.389(3) . ?
C11 C12 1.399(3) . ?
C13 C14 1.398(3) . ?
C13 C18 1.425(3) . ?
C14 C15 1.390(3) . ?
C15 C16 1.383(3) . ?
C16 C17 1.389(3) . ?
C17 C18 1.388(3) . ?
 
loop_
 _geom_angle_atom_site_label_1
 _geom_angle_atom_site_label_2
 _geom_angle_atom_site_label_3
 _geom_angle
 _geom_angle_site_symmetry_1
 _geom_angle_site_symmetry_3
 _geom_angle_publ_flag
C05 Mn1 C03 100.07(10) . . ?
C05 Mn1 C01 84.89(10) . . ?
C03 Mn1 C01 91.27(10) . . ?
C05 Mn1 C02 98.65(10) . . ?
C03 Mn1 C02 161.26(9) . . ?
C01 Mn1 C02 89.77(10) . . ?
C05 Mn1 C04 86.18(10) . . ?
C03 Mn1 C04 89.98(9) . . ?
C01 Mn1 C04 171.06(8) . . ?
C02 Mn1 C04 91.88(10) . . ?
C05 Mn1 Rh2 176.73(8) . . ?
C03 Mn1 Rh2 77.00(7) . . ?
C01 Mn1 Rh2 96.58(7) . . ?
C02 Mn1 Rh2 84.29(7) . . ?
C04 Mn1 Rh2 92.33(6) . . ?
N3 Rh2 N1 165.78(6) . . ?
N3 Rh2 N4 97.10(7) . . ?
N1 Rh2 N4 81.80(7) . . ?
N3 Rh2 N2 81.66(7) . . ?
N1 Rh2 N2 96.77(7) . . ?
N4 Rh2 N2 169.29(6) . . ?
N3 Rh2 Mn1 96.56(5) . . ?
N1 Rh2 Mn1 97.65(5) . . ?
N4 Rh2 Mn1 92.62(5) . . ?
N2 Rh2 Mn1 98.09(5) . . ?
C1 N1 C18 125.75(18) . . ?
C1 N1 Rh2 121.19(14) . . ?
C18 N1 Rh2 112.29(13) . . ?
C3 N2 C12 125.77(17) . . ?
C3 N2 Rh2 121.80(13) . . ?
C12 N2 Rh2 111.75(13) . . ?
C3' N3 C7 125.65(18) . . ?
C3' N3 Rh2 120.96(14) . . ?
C7 N3 Rh2 112.34(14) . . ?
C1' N4 C13 126.18(17) . . ?
C1' N4 Rh2 121.61(14) . . ?
C13 N4 Rh2 111.72(13) . . ?
O1 C01 Mn1 170.4(2) . . ?
N1 C1 C2 122.92(19) . . ?
N1 C1 C4 122.60(18) . . ?
C2 C1 C4 114.35(19) . . ?
N4 C1' C2' 122.74(18) . . ?
N4 C1' C4' 122.78(18) . . ?
C2' C1' C4' 114.40(19) . . ?
O2 C02 Mn1 177.60(19) . . ?
C3 C2 C1 132.3(2) . . ?
C3' C2' C1' 132.5(2) . . ?
N2 C3 C2 122.68(18) . . ?
N2 C3 C5 122.85(18) . . ?
C2 C3 C5 114.36(18) . . ?
O3 C03 Mn1 176.56(19) . . ?
N3 C3' C2' 122.62(19) . . ?
N3 C3' C5' 122.41(18) . . ?
C2' C3' C5' 114.84(19) . . ?
O4 C04 Mn1 172.37(19) . . ?
O5 C05 Mn1 179.8(2) . . ?
C8 C7 C12 119.81(18) . . ?
C8 C7 N3 125.07(19) . . ?
C12 C7 N3 114.78(18) . . ?
C9 C8 C7 120.2(2) . . ?
C10 C9 C8 120.1(2) . . ?
C9 C10 C11 120.5(2) . . ?
C10 C11 C12 120.6(2) . . ?
C11 C12 C7 118.68(19) . . ?
C11 C12 N2 125.94(19) . . ?
C7 C12 N2 115.18(17) . . ?
C14 C13 N4 126.42(19) . . ?
C14 C13 C18 118.2(2) . . ?
N4 C13 C18 115.06(17) . . ?
C15 C14 C13 121.0(2) . . ?
C16 C15 C14 120.5(2) . . ?
C15 C16 C17 119.6(2) . . ?
C18 C17 C16 121.1(2) . . ?
C17 C18 N1 125.3(2) . . ?
C17 C18 C13 119.64(19) . . ?
N1 C18 C13 114.66(19) . . ?
 
loop_
 _geom_torsion_atom_site_label_1
 _geom_torsion_atom_site_label_2
 _geom_torsion_atom_site_label_3
 _geom_torsion_atom_site_label_4
 _geom_torsion
 _geom_torsion_site_symmetry_1
 _geom_torsion_site_symmetry_2
 _geom_torsion_site_symmetry_3
 _geom_torsion_site_symmetry_4
 _geom_torsion_publ_flag
C18 N1 C1 C2 176.6(2) . . . . ?
Rh2 N1 C1 C2 -14.2(3) . . . . ?
C18 N1 C1 C4 -7.8(3) . . . . ?
Rh2 N1 C1 C4 161.33(17) . . . . ?
C13 N4 C1' C2' 175.9(2) . . . . ?
Rh2 N4 C1' C2' 4.6(3) . . . . ?
C13 N4 C1' C4' -0.6(3) . . . . ?
Rh2 N4 C1' C4' -171.90(15) . . . . ?
N1 C1 C2 C3 3.8(4) . . . . ?
C4 C1 C2 C3 -172.1(2) . . . . ?
N4 C1' C2' C3' 1.9(4) . . . . ?
C4' C1' C2' C3' 178.7(2) . . . . ?
C12 N2 C3 C2 176.8(2) . . . . ?
Rh2 N2 C3 C2 7.1(3) . . . . ?
C12 N2 C3 C5 0.8(3) . . . . ?
Rh2 N2 C3 C5 -168.94(15) . . . . ?
C1 C2 C3 N2 0.4(4) . . . . ?
C1 C2 C3 C5 176.7(2) . . . . ?
C7 N3 C3' C2' 176.95(19) . . . . ?
Rh2 N3 C3' C2' -15.7(3) . . . . ?
C7 N3 C3' C5' -7.6(3) . . . . ?
Rh2 N3 C3' C5' 159.75(15) . . . . ?
C1' C2' C3' N3 4.5(4) . . . . ?
C1' C2' C3' C5' -171.3(2) . . . . ?
C3' N3 C7 C8 -30.7(3) . . . . ?
Rh2 N3 C7 C8 161.04(17) . . . . ?
C3' N3 C7 C12 156.08(19) . . . . ?
Rh2 N3 C7 C12 -12.2(2) . . . . ?
C12 C7 C8 C9 -0.5(3) . . . . ?
N3 C7 C8 C9 -173.4(2) . . . . ?
C7 C8 C9 C10 1.8(3) . . . . ?
C8 C9 C10 C11 -0.7(4) . . . . ?
C9 C10 C11 C12 -1.7(3) . . . . ?
C10 C11 C12 C7 2.9(3) . . . . ?
C10 C11 C12 N2 177.5(2) . . . . ?
C8 C7 C12 C11 -1.8(3) . . . . ?
N3 C7 C12 C11 171.79(18) . . . . ?
C8 C7 C12 N2 -176.95(18) . . . . ?
N3 C7 C12 N2 -3.3(3) . . . . ?
C3 N2 C12 C11 31.8(3) . . . . ?
Rh2 N2 C12 C11 -157.58(18) . . . . ?
C3 N2 C12 C7 -153.5(2) . . . . ?
Rh2 N2 C12 C7 17.1(2) . . . . ?
C1' N4 C13 C14 30.5(3) . . . . ?
Rh2 N4 C13 C14 -157.50(19) . . . . ?
C1' N4 C13 C18 -155.83(19) . . . . ?
Rh2 N4 C13 C18 16.2(2) . . . . ?
N4 C13 C14 C15 175.2(2) . . . . ?
C18 C13 C14 C15 1.7(3) . . . . ?
C13 C14 C15 C16 -1.0(4) . . . . ?
C14 C15 C16 C17 -0.9(4) . . . . ?
C15 C16 C17 C18 2.1(4) . . . . ?
C16 C17 C18 N1 -173.8(2) . . . . ?
C16 C17 C18 C13 -1.4(3) . . . . ?
C1 N1 C18 C17 -31.2(3) . . . . ?
Rh2 N1 C18 C17 158.81(18) . . . . ?
C1 N1 C18 C13 156.1(2) . . . . ?
Rh2 N1 C18 C13 -13.9(2) . . . . ?
C14 C13 C18 C17 -0.5(3) . . . . ?
N4 C13 C18 C17 -174.75(19) . . . . ?
C14 C13 C18 N1 172.68(19) . . . . ?
N4 C13 C18 N1 -1.6(3) . . . . ?
 
_refine_diff_density_max    0.615
_refine_diff_density_min   -0.615
_refine_diff_density_rms    0.077

_shelxl_version_number 2013-3

_shelx_res_file
;
TITL solve_2 in P-1
CELL 0.71073  10.7295  11.5936  12.5401  98.187 111.431 113.253
ZERR    2.00   0.0007   0.0007   0.0013   0.002   0.002   0.001
LATT  1
SFAC C H N O MN RH
UNIT 54 44 8 10 2 2
TEMP -173.180
SIZE .28 .2 .15
L.S. 16
BOND
FMAP 2
PLAN 20
ACTA
CONF

WGHT    0.026900    0.360300
BASF   0.50615
FVAR       0.48705
MN1   5    0.539643    0.254845    0.118218    11.00000    0.01413    0.01641 =
         0.01368    0.00453    0.00559    0.00800
RH2   6    0.484239    0.256000    0.312603    11.00000    0.00915    0.00945 =
         0.01262    0.00276    0.00363    0.00445
N1    3    0.257147    0.178436    0.222442    11.00000    0.01183    0.01291 =
         0.01737    0.00232    0.00515    0.00638
N2    3    0.484768    0.086905    0.330019    11.00000    0.01245    0.01267 =
         0.01148    0.00366    0.00494    0.00594
N3    3    0.701804    0.335398    0.438521    11.00000    0.01175    0.01168 =
         0.01360    0.00411    0.00514    0.00553
N4    3    0.476330    0.426706    0.322163    11.00000    0.01169    0.01202 =
         0.01648    0.00459    0.00535    0.00591
O1    4    0.307193    0.322348   -0.034459    11.00000    0.02954    0.03757 =
         0.02768    0.01304    0.00902    0.02236
O2    4    0.758475    0.546319    0.254136    11.00000    0.02206    0.02028 =
         0.02715    0.00379    0.00842    0.00608
O3    4    0.301932   -0.029073    0.043610    11.00000    0.01907    0.01776 =
         0.02024    0.00241    0.00644    0.00506
O4    4    0.786448    0.180215    0.212237    11.00000    0.02191    0.03143 =
         0.02147    0.00825    0.00915    0.01689
O5    4    0.593988    0.237141   -0.096071    11.00000    0.04252    0.03281 =
         0.02441    0.01335    0.02108    0.02001
C01   1    0.391092    0.297172    0.030858    11.00000    0.01997    0.02162 =
         0.01784    0.00497    0.00887    0.01002
C1    1    0.162722    0.059825    0.220687    11.00000    0.01268    0.01485 =
         0.01714    0.00057    0.00600    0.00506
C1'   1    0.587769    0.540884    0.412086    11.00000    0.01546    0.01090 =
         0.01819    0.00453    0.00949    0.00531
C02   1    0.675652    0.435490    0.204941    11.00000    0.01985    0.02625 =
         0.01649    0.00839    0.00846    0.01424
C2    1    0.211911   -0.030442    0.257553    11.00000    0.01458    0.01192 =
         0.01857    0.00228    0.00741    0.00340
AFIX  43
H2A   2    0.131607   -0.112956    0.246706    11.00000   -1.20000
AFIX   0
C2'   1    0.722273    0.551478    0.500598    11.00000    0.01345    0.01084 =
         0.01707    0.00291    0.00572    0.00321
AFIX  43
H2'A  2    0.789933    0.637565    0.560409    11.00000   -1.20000
AFIX   0
C3    1    0.357373   -0.021729    0.307411    11.00000    0.01718    0.01237 =
         0.01060    0.00316    0.00616    0.00603
C03   1    0.391735    0.079541    0.075143    11.00000    0.01731    0.02612 =
         0.01435    0.00763    0.00664    0.01381
C3'   1    0.776090    0.459416    0.517784    11.00000    0.01064    0.01524 =
         0.01406    0.00453    0.00459    0.00382
C04   1    0.693077    0.209712    0.184239    11.00000    0.01802    0.01868 =
         0.01303    0.00229    0.00708    0.00614
C4    1   -0.003922    0.015739    0.187205    11.00000    0.01458    0.01951 =
         0.03852    0.00856    0.01151    0.00734
AFIX 137
H4A   2   -0.015182    0.093842    0.211199    11.00000   -1.50000
H4B   2   -0.037326   -0.045455    0.229604    11.00000   -1.50000
H4C   2   -0.066866   -0.029638    0.099192    11.00000   -1.50000
AFIX   0
C4'   1    0.575628    0.667501    0.431082    11.00000    0.01948    0.01243 =
         0.01925    0.00224    0.00604    0.00863
AFIX 137
H4'A  2    0.471877    0.645519    0.417813    11.00000   -1.50000
H4'B  2    0.597512    0.710375    0.373372    11.00000   -1.50000
H4'C  2    0.649654    0.728382    0.514329    11.00000   -1.50000
AFIX   0
C05   1    0.573115    0.244121   -0.012543    11.00000    0.01951    0.01923 =
         0.01959    0.00781    0.00841    0.00941
C5    1    0.358854   -0.142123    0.340633    11.00000    0.02038    0.01365 =
         0.01991    0.00690    0.01081    0.00783
AFIX 137
H5A   2    0.453134   -0.112973    0.415176    11.00000   -1.50000
H5B   2    0.354266   -0.202480    0.274339    11.00000   -1.50000
H5C   2    0.270120   -0.188708    0.353849    11.00000   -1.50000
AFIX   0
C5'   1    0.918485    0.507728    0.637291    11.00000    0.01601    0.01485 =
         0.01841    0.00355    0.00304    0.00414
AFIX 137
H5'A  2    0.914339    0.432391    0.665627    11.00000   -1.50000
H5'B  2    0.923435    0.575014    0.698056    11.00000   -1.50000
H5'C  2    1.009578    0.546960    0.625315    11.00000   -1.50000
AFIX   0
C7    1    0.752972    0.239179    0.447164    11.00000    0.01436    0.01572 =
         0.01280    0.00782    0.00702    0.00931
C8    1    0.906133    0.268639    0.499845    11.00000    0.01417    0.01663 =
         0.01923    0.00721    0.00613    0.00730
AFIX  43
H8A   2    0.985161    0.358661    0.540897    11.00000   -1.20000
AFIX   0
C9    1    0.943284    0.166558    0.492375    11.00000    0.01479    0.02446 =
         0.03023    0.01113    0.00669    0.01263
AFIX  43
H9A   2    1.047432    0.186835    0.530268    11.00000   -1.20000
AFIX   0
C10   1    0.829184    0.036066    0.430074    11.00000    0.02341    0.02317 =
         0.03502    0.01599    0.01320    0.01724
AFIX  43
H10A  2    0.855234   -0.033158    0.424528    11.00000   -1.20000
AFIX   0
C11   1    0.676433    0.005023    0.375351    11.00000    0.01750    0.01536 =
         0.02299    0.00769    0.00828    0.00874
AFIX  43
H11A  2    0.599015   -0.085053    0.330782    11.00000   -1.20000
AFIX   0
C12   1    0.635480    0.105141    0.385236    11.00000    0.01341    0.01563 =
         0.01264    0.00564    0.00508    0.00767
C13   1    0.333748    0.405759    0.234039    11.00000    0.01457    0.01417 =
         0.01687    0.00204    0.00560    0.00812
C14   1    0.305498    0.500771    0.187988    11.00000    0.02134    0.01586 =
         0.02403    0.00583    0.00679    0.01128
AFIX  43
H14A  2    0.384866    0.590708    0.220681    11.00000   -1.20000
AFIX   0
C15   1    0.162954    0.465517    0.095062    11.00000    0.02416    0.02208 =
         0.02951    0.00899    0.00604    0.01700
AFIX  43
H15A  2    0.145394    0.531696    0.065813    11.00000   -1.20000
AFIX   0
C16   1    0.046550    0.334815    0.044903    11.00000    0.01818    0.02636 =
         0.02490    0.00455    0.00215    0.01509
AFIX  43
H16A  2   -0.051147    0.311348   -0.017781    11.00000   -1.20000
AFIX   0
C17   1    0.073395    0.238033    0.086772    11.00000    0.01378    0.01878 =
         0.02196    0.00154    0.00331    0.00756
AFIX  43
H17A  2   -0.005640    0.147802    0.050336    11.00000   -1.20000
AFIX   0
C18   1    0.213727    0.270972    0.180924    11.00000    0.01183    0.01493 =
         0.01974    0.00414    0.00684    0.00682

HKLF 5

REM  solve_2 in P-1
REM R1 =  0.0226 for    5358 Fo > 4sig(Fo)  and  0.0274 for all    5848 data
REM    348 parameters refined using      0 restraints

END

WGHT      0.0269      0.3603

REM Highest difference peak  0.615,  deepest hole -0.615,  1-sigma level  0.077
Q1    1   0.4444  0.1755  0.1857  11.00000  0.05    0.62
Q2    1   0.4894  0.2374  0.2462  11.00000  0.05    0.54
Q3    1   0.2736  0.3430  0.2131  11.00000  0.05    0.41
Q4    1   0.4346  0.0485  0.3430  11.00000  0.05    0.40
Q5    1   0.5984  0.3866  0.3762  11.00000  0.05    0.39
Q6    1   0.0822  0.0408  0.2049  11.00000  0.05    0.39
Q7    1   0.5216  0.2948  0.3908  11.00000  0.05    0.38
Q8    1   0.6955  0.1806  0.4141  11.00000  0.05    0.37
Q9    1   0.4850  0.1315  0.3184  11.00000  0.05    0.37
Q10   1   0.9060  0.1995  0.4735  11.00000  0.05    0.37
Q11   1   0.2258  0.2208  0.1914  11.00000  0.05    0.35
Q12   1   0.5816  0.3248  0.2643  11.00000  0.05    0.35
Q13   1   0.5038  0.2707  0.1867  11.00000  0.05    0.35
Q14   1   0.6615  0.0590  0.3866  11.00000  0.05    0.34
Q15   1  -0.0761  0.3542  0.0524  11.00000  0.05    0.34
Q16   1   0.7579  0.0237  0.3752  11.00000  0.05    0.34
Q17   1   0.5377  0.2326  0.0471  11.00000  0.05    0.33
Q18   1   0.5474  0.0833  0.3420  11.00000  0.05    0.32
Q19   1   0.3093  0.4567  0.2220  11.00000  0.05    0.32
Q20   1   0.8407  0.4780  0.5654  11.00000  0.05    0.32
;
_shelx_res_checksum   51864

_shelx_hkl_file
;
  -1   0   1  147.76    2.68  -1 0.00000 0.00000 0.00000 0.00000 0.00000 0.00000
   0   0   1  147.76    2.68   2 0.00000 0.00000 0.00000 0.00000 0.00000 0.00000
  -2   0   2    3.01    0.66   2 0.00000 0.00000 0.00000 0.00000 0.00000 0.00000
  -3   0   3  276.61    3.11   2 0.00000 0.00000 0.00000 0.00000 0.00000 0.00000
  -4   0   4    2.78    0.79   2 0.00000 0.00000 0.00000 0.00000 0.00000 0.00000
  -5   0   5  325.39    4.00   2 0.00000 0.00000 0.00000 0.00000 0.00000 0.00000
  -6   0   6  105.85    2.46   2 0.00000 0.00000 0.00000 0.00000 0.00000 0.00000
  -7   0   7  720.93    8.27  -1 0.00000 0.00000 0.00000 0.00000 0.00000 0.00000
  -1   0   9  720.93    8.27   2 0.00000 0.00000 0.00000 0.00000 0.00000 0.00000
  -8   0   8  410.27    5.79  -1 0.00000 0.00000 0.00000 0.00000 0.00000 0.00000
  -1   0  10  410.27    5.79   2 0.00000 0.00000 0.00000 0.00000 0.00000 0.00000
  -9   0   9  457.97    6.80  -1 0.00000 0.00000 0.00000 0.00000 0.00000 0.00000
  -1   0  11  457.97    6.80   2 0.00000 0.00000 0.00000 0.00000 0.00000 0.00000
 -10   0  10    6.47    1.73   2 0.00000 0.00000 0.00000 0.00000 0.00000 0.00000
 -11   0  11    0.72    1.75   2 0.00000 0.00000 0.00000 0.00000 0.00000 0.00000
 -12   0  12  174.30    4.73   2 0.00000 0.00000 0.00000 0.00000 0.00000 0.00000
  12  -1 -11  183.65    4.61   2 0.00000 0.00000 0.00000 0.00000 0.00000 0.00000
  11  -1 -10   14.88    2.00   2 0.00000 0.00000 0.00000 0.00000 0.00000 0.00000
  10  -1  -9    9.12    1.42   2 0.00000 0.00000 0.00000 0.00000 0.00000 0.00000
   9  -1  -8  208.43    3.41   2 0.00000 0.00000 0.00000 0.00000 0.00000 0.00000
   8  -1  -7  369.58    5.09   2 0.00000 0.00000 0.00000 0.00000 0.00000 0.00000
   7  -1  -6  218.52    3.90  -1 0.00000 0.00000 0.00000 0.00000 0.00000 0.00000
   0  -1   8  218.52    3.90   2 0.00000 0.00000 0.00000 0.00000 0.00000 0.00000
   6  -1  -5  273.27    2.69  -1 0.00000 0.00000 0.00000 0.00000 0.00000 0.00000
   0  -1   7  273.27    2.69   2 0.00000 0.00000 0.00000 0.00000 0.00000 0.00000
   5  -1  -4  444.28    4.79   2 0.00000 0.00000 0.00000 0.00000 0.00000 0.00000
   4  -1  -3    5.43    0.76   2 0.00000 0.00000 0.00000 0.00000 0.00000 0.00000
   3  -1  -2   45.61    1.14   2 0.00000 0.00000 0.00000 0.00000 0.00000 0.00000
   2  -1  -1  155.23    1.53   2 0.00000 0.00000 0.00000 0.00000 0.00000 0.00000
   1  -1   0    8.51    0.44   2 0.00000 0.00000 0.00000 0.00000 0.00000 0.00000
   0  -1   1 4210.98   21.54   2 0.00000 0.00000 0.00000 0.00000 0.00000 0.00000
  -1  -1   2  564.38    4.42  -1 0.00000 0.00000 0.00000 0.00000 0.00000 0.00000
  -1   1   2  564.38    4.42   2 0.00000 0.00000 0.00000 0.00000 0.00000 0.00000
  -2  -1   3 1456.26   10.68  -1 0.00000 0.00000 0.00000 0.00000 0.00000 0.00000
  -1   1   3 1456.26   10.68   2 0.00000 0.00000 0.00000 0.00000 0.00000 0.00000
  -3  -1   4 2715.95   30.91   2 0.00000 0.00000 0.00000 0.00000 0.00000 0.00000
  -4  -1   5    5.24    1.26   2 0.00000 0.00000 0.00000 0.00000 0.00000 0.00000
  -5  -1   6  292.79    5.43   2 0.00000 0.00000 0.00000 0.00000 0.00000 0.00000
  -6  -1   7   14.85    2.53   2 0.00000 0.00000 0.00000 0.00000 0.00000 0.00000
  -7  -1   8  220.38    5.37   2 0.00000 0.00000 0.00000 0.00000 0.00000 0.00000
  -8  -1   9   13.42    3.20  -1 0.00000 0.00000 0.00000 0.00000 0.00000 0.00000
  -2   1  11   13.42    3.20   2 0.00000 0.00000 0.00000 0.00000 0.00000 0.00000
  -9  -1  10  230.56    4.69  -1 0.00000 0.00000 0.00000 0.00000 0.00000 0.00000
  -2   1  12  230.56    4.69   2 0.00000 0.00000 0.00000 0.00000 0.00000 0.00000
 -10  -1  11  158.25    7.14  -1 0.00000 0.00000 0.00000 0.00000 0.00000 0.00000
  -2   1  13  158.25    7.14   2 0.00000 0.00000 0.00000 0.00000 0.00000 0.00000
 -11  -1  12   17.57    2.21   2 0.00000 0.00000 0.00000 0.00000 0.00000 0.00000
  13  -2 -11   81.05    3.94  -1 0.00000 0.00000 0.00000 0.00000 0.00000 0.00000
   0  -2  15   81.05    3.94   2 0.00000 0.00000 0.00000 0.00000 0.00000 0.00000
  12  -2 -10   63.76    4.30  -1 0.00000 0.00000 0.00000 0.00000 0.00000 0.00000
   0  -2  14   63.76    4.30   2 0.00000 0.00000 0.00000 0.00000 0.00000 0.00000
  11  -2  -9   78.10    2.67   2 0.00000 0.00000 0.00000 0.00000 0.00000 0.00000
  10  -2  -8  148.39    3.04   2 0.00000 0.00000 0.00000 0.00000 0.00000 0.00000
   9  -2  -7  322.11    4.09   2 0.00000 0.00000 0.00000 0.00000 0.00000 0.00000
   8  -2  -6   59.55    2.09   2 0.00000 0.00000 0.00000 0.00000 0.00000 0.00000
   7  -2  -5   11.91    1.19   2 0.00000 0.00000 0.00000 0.00000 0.00000 0.00000
   6  -2  -4   82.51    1.73  -1 0.00000 0.00000 0.00000 0.00000 0.00000 0.00000
   1  -2   6   82.51    1.73   2 0.00000 0.00000 0.00000 0.00000 0.00000 0.00000
   5  -2  -3 1755.49   10.63  -1 0.00000 0.00000 0.00000 0.00000 0.00000 0.00000
   1  -2   5 1755.49   10.63   2 0.00000 0.00000 0.00000 0.00000 0.00000 0.00000
   4  -2  -2   38.52    1.16   2 0.00000 0.00000 0.00000 0.00000 0.00000 0.00000
   3  -2  -1  213.83    2.07   2 0.00000 0.00000 0.00000 0.00000 0.00000 0.00000
   2  -2   0 1620.51   10.77   2 0.00000 0.00000 0.00000 0.00000 0.00000 0.00000
   1  -2   1   70.55    1.06   2 0.00000 0.00000 0.00000 0.00000 0.00000 0.00000
   0  -2   2   20.59    0.87   2 0.00000 0.00000 0.00000 0.00000 0.00000 0.00000
  -1  -2   3  303.30    3.27   2 0.00000 0.00000 0.00000 0.00000 0.00000 0.00000
  -2  -2   4   64.08    2.23  -1 0.00000 0.00000 0.00000 0.00000 0.00000 0.00000
  -2   2   4   64.08    2.23   2 0.00000 0.00000 0.00000 0.00000 0.00000 0.00000
  -3  -2   5 2719.54   19.57  -1 0.00000 0.00000 0.00000 0.00000 0.00000 0.00000
  -2   2   5 2719.54   19.57   2 0.00000 0.00000 0.00000 0.00000 0.00000 0.00000
  -4  -2   6   82.83    4.40  -1 0.00000 0.00000 0.00000 0.00000 0.00000 0.00000
  -2   2   6   82.83    4.40   2 0.00000 0.00000 0.00000 0.00000 0.00000 0.00000
  -5  -2   7    6.11    1.50   2 0.00000 0.00000 0.00000 0.00000 0.00000 0.00000
  -6  -2   8  122.53    4.12   2 0.00000 0.00000 0.00000 0.00000 0.00000 0.00000
  -7  -2   9   47.30    3.46   2 0.00000 0.00000 0.00000 0.00000 0.00000 0.00000
  -8  -2  10   16.35    2.40   2 0.00000 0.00000 0.00000 0.00000 0.00000 0.00000
  -9  -2  11   -0.23    1.56   2 0.00000 0.00000 0.00000 0.00000 0.00000 0.00000
 -10  -2  12  329.87    9.74  -1 0.00000 0.00000 0.00000 0.00000 0.00000 0.00000
  -3   2  14  329.87    9.74   2 0.00000 0.00000 0.00000 0.00000 0.00000 0.00000
 -11  -2  13   18.06    5.65  -1 0.00000 0.00000 0.00000 0.00000 0.00000 0.00000
  -3   2  15   18.06    5.65   2 0.00000 0.00000 0.00000 0.00000 0.00000 0.00000
  13  -3 -10   32.05    4.11  -1 0.00000 0.00000 0.00000 0.00000 0.00000 0.00000
   1  -3  14   32.05    4.11   2 0.00000 0.00000 0.00000 0.00000 0.00000 0.00000
  12  -3  -9   30.59    3.13  -1 0.00000 0.00000 0.00000 0.00000 0.00000 0.00000
   1  -3  13   30.59    3.13   2 0.00000 0.00000 0.00000 0.00000 0.00000 0.00000
  11  -3  -8    9.80    3.11  -1 0.00000 0.00000 0.00000 0.00000 0.00000 0.00000
   1  -3  12    9.80    3.11   2 0.00000 0.00000 0.00000 0.00000 0.00000 0.00000
  10  -3  -7  181.65    3.24   2 0.00000 0.00000 0.00000 0.00000 0.00000 0.00000
   9  -3  -6  158.19    2.90   2 0.00000 0.00000 0.00000 0.00000 0.00000 0.00000
   8  -3  -5   66.24    1.96   2 0.00000 0.00000 0.00000 0.00000 0.00000 0.00000
   7  -3  -4  416.41    3.60   2 0.00000 0.00000 0.00000 0.00000 0.00000 0.00000
   6  -3  -3  282.51    2.66   2 0.00000 0.00000 0.00000 0.00000 0.00000 0.00000
   5  -3  -2    1.14    0.62   2 0.00000 0.00000 0.00000 0.00000 0.00000 0.00000
   4  -3  -1   28.82    1.21  -1 0.00000 0.00000 0.00000 0.00000 0.00000 0.00000
   2  -3   3   28.82    1.21   2 0.00000 0.00000 0.00000 0.00000 0.00000 0.00000
   3  -3   0  235.03    2.21   2 0.00000 0.00000 0.00000 0.00000 0.00000 0.00000
   2  -3   1  858.95    6.06   2 0.00000 0.00000 0.00000 0.00000 0.00000 0.00000
   1  -3   2  354.52    2.56   2 0.00000 0.00000 0.00000 0.00000 0.00000 0.00000
   0  -3   3  340.39    2.57   2 0.00000 0.00000 0.00000 0.00000 0.00000 0.00000
  -1  -3   4  232.13    2.42   2 0.00000 0.00000 0.00000 0.00000 0.00000 0.00000
  -2  -3   5   88.55    2.13   2 0.00000 0.00000 0.00000 0.00000 0.00000 0.00000
  -3  -3   6  338.62    3.68  -1 0.00000 0.00000 0.00000 0.00000 0.00000 0.00000
  -3   3   6  338.62    3.68   2 0.00000 0.00000 0.00000 0.00000 0.00000 0.00000
  -4  -3   7    0.00    1.20  -1 0.00000 0.00000 0.00000 0.00000 0.00000 0.00000
  -3   3   7    0.00    1.20   2 0.00000 0.00000 0.00000 0.00000 0.00000 0.00000
  -5  -3   8  325.34    4.05  -1 0.00000 0.00000 0.00000 0.00000 0.00000 0.00000
  -3   3   8  325.34    4.05   2 0.00000 0.00000 0.00000 0.00000 0.00000 0.00000
  -6  -3   9  168.35    3.63   2 0.00000 0.00000 0.00000 0.00000 0.00000 0.00000
  -7  -3  10   15.25    1.85   2 0.00000 0.00000 0.00000 0.00000 0.00000 0.00000
  -8  -3  11   10.19    1.90   2 0.00000 0.00000 0.00000 0.00000 0.00000 0.00000
  -9  -3  12   -0.80    1.47   2 0.00000 0.00000 0.00000 0.00000 0.00000 0.00000
 -10  -3  13  212.24    3.56   2 0.00000 0.00000 0.00000 0.00000 0.00000 0.00000
  13  -4  -9   39.51    3.05   2 0.00000 0.00000 0.00000 0.00000 0.00000 0.00000
  12  -4  -8   40.50    2.95   2 0.00000 0.00000 0.00000 0.00000 0.00000 0.00000
  11  -4  -7  231.04    5.07  -1 0.00000 0.00000 0.00000 0.00000 0.00000 0.00000
   2  -4  11  231.04    5.07   2 0.00000 0.00000 0.00000 0.00000 0.00000 0.00000
  10  -4  -6  626.47    8.12  -1 0.00000 0.00000 0.00000 0.00000 0.00000 0.00000
   2  -4  10  626.47    8.12   2 0.00000 0.00000 0.00000 0.00000 0.00000 0.00000
   9  -4  -5   34.72    4.71  -1 0.00000 0.00000 0.00000 0.00000 0.00000 0.00000
   2  -4   9   34.72    4.71   2 0.00000 0.00000 0.00000 0.00000 0.00000 0.00000
   8  -4  -4   13.08    0.95   2 0.00000 0.00000 0.00000 0.00000 0.00000 0.00000
   7  -4  -3  487.85    3.98   2 0.00000 0.00000 0.00000 0.00000 0.00000 0.00000
   6  -4  -2  216.35    2.60   2 0.00000 0.00000 0.00000 0.00000 0.00000 0.00000
   5  -4  -1    0.99    0.58   2 0.00000 0.00000 0.00000 0.00000 0.00000 0.00000
   4  -4   0  499.26    4.08   2 0.00000 0.00000 0.00000 0.00000 0.00000 0.00000
   3  -4   1   21.70    2.48  -1 0.00000 0.00000 0.00000 0.00000 0.00000 0.00000
   3  -4   1   21.70    2.48   2 0.00000 0.00000 0.00000 0.00000 0.00000 0.00000
   1  -4   3  570.85    3.92   2 0.00000 0.00000 0.00000 0.00000 0.00000 0.00000
   0  -4   4   61.97    1.25   2 0.00000 0.00000 0.00000 0.00000 0.00000 0.00000
  -1  -4   5  696.21    4.87   2 0.00000 0.00000 0.00000 0.00000 0.00000 0.00000
  -2  -4   6  318.97    3.30   2 0.00000 0.00000 0.00000 0.00000 0.00000 0.00000
  -3  -4   7   83.51    1.93   2 0.00000 0.00000 0.00000 0.00000 0.00000 0.00000
  -4  -4   8  221.16    6.84  -1 0.00000 0.00000 0.00000 0.00000 0.00000 0.00000
  -4   4   8  221.16    6.84   2 0.00000 0.00000 0.00000 0.00000 0.00000 0.00000
  -5  -4   9  133.09    3.91  -1 0.00000 0.00000 0.00000 0.00000 0.00000 0.00000
  -4   4   9  133.09    3.91   2 0.00000 0.00000 0.00000 0.00000 0.00000 0.00000
  -6  -4  10  161.84    4.63  -1 0.00000 0.00000 0.00000 0.00000 0.00000 0.00000
  -4   4  10  161.84    4.63   2 0.00000 0.00000 0.00000 0.00000 0.00000 0.00000
  -7  -4  11   30.93    2.13   2 0.00000 0.00000 0.00000 0.00000 0.00000 0.00000
  -7  -4  11   48.14    6.21  -1 0.00000 0.00000 0.00000 0.00000 0.00000 0.00000
  -4   4  11   48.14    6.21   2 0.00000 0.00000 0.00000 0.00000 0.00000 0.00000
  -8  -4  12  137.77    3.16   2 0.00000 0.00000 0.00000 0.00000 0.00000 0.00000
  -9  -4  13    6.22    1.49   2 0.00000 0.00000 0.00000 0.00000 0.00000 0.00000
  13  -5  -8  107.31    3.80   2 0.00000 0.00000 0.00000 0.00000 0.00000 0.00000
  12  -5  -7  124.80    3.75   2 0.00000 0.00000 0.00000 0.00000 0.00000 0.00000
  11  -5  -6  140.54    3.02   2 0.00000 0.00000 0.00000 0.00000 0.00000 0.00000
  10  -5  -5  486.36    9.95  -1 0.00000 0.00000 0.00000 0.00000 0.00000 0.00000
   3  -5   9  486.36    9.95   2 0.00000 0.00000 0.00000 0.00000 0.00000 0.00000
   9  -5  -4  277.50    4.79  -1 0.00000 0.00000 0.00000 0.00000 0.00000 0.00000
   3  -5   8  277.50    4.79   2 0.00000 0.00000 0.00000 0.00000 0.00000 0.00000
   8  -5  -3  620.35    7.20  -1 0.00000 0.00000 0.00000 0.00000 0.00000 0.00000
   3  -5   7  620.35    7.20   2 0.00000 0.00000 0.00000 0.00000 0.00000 0.00000
   7  -5  -2  267.72    3.13   2 0.00000 0.00000 0.00000 0.00000 0.00000 0.00000
   6  -5  -1   57.44    1.51   2 0.00000 0.00000 0.00000 0.00000 0.00000 0.00000
   5  -5   0   10.72    0.83   2 0.00000 0.00000 0.00000 0.00000 0.00000 0.00000
   4  -5   1  310.75    2.57   2 0.00000 0.00000 0.00000 0.00000 0.00000 0.00000
   3  -5   2   41.82    1.32   2 0.00000 0.00000 0.00000 0.00000 0.00000 0.00000
   1  -5   4 2329.80   19.15  -1 0.00000 0.00000 0.00000 0.00000 0.00000 0.00000
  -4   5   2 2329.80   19.15   2 0.00000 0.00000 0.00000 0.00000 0.00000 0.00000
   0  -5   5  334.66    2.91   2 0.00000 0.00000 0.00000 0.00000 0.00000 0.00000
  -1  -5   6  330.48    2.99   2 0.00000 0.00000 0.00000 0.00000 0.00000 0.00000
  -2  -5   7  164.59    2.20   2 0.00000 0.00000 0.00000 0.00000 0.00000 0.00000
  -3  -5   8   91.46    2.10   2 0.00000 0.00000 0.00000 0.00000 0.00000 0.00000
  -4  -5   9  551.77    5.41   2 0.00000 0.00000 0.00000 0.00000 0.00000 0.00000
  -5  -5  10  125.21    2.70   2 0.00000 0.00000 0.00000 0.00000 0.00000 0.00000
  -6  -5  11   13.43    3.41  -1 0.00000 0.00000 0.00000 0.00000 0.00000 0.00000
  -5   5  11   13.43    3.41   2 0.00000 0.00000 0.00000 0.00000 0.00000 0.00000
  -7  -5  12    7.84    4.37  -1 0.00000 0.00000 0.00000 0.00000 0.00000 0.00000
  -5   5  12    7.84    4.37   2 0.00000 0.00000 0.00000 0.00000 0.00000 0.00000
  -8  -5  13  252.25    9.20  -1 0.00000 0.00000 0.00000 0.00000 0.00000 0.00000
  -5   5  13  252.25    9.20   2 0.00000 0.00000 0.00000 0.00000 0.00000 0.00000
  14  -6  -8    7.83    2.84   2 0.00000 0.00000 0.00000 0.00000 0.00000 0.00000
  13  -6  -7  164.96    4.38   2 0.00000 0.00000 0.00000 0.00000 0.00000 0.00000
  12  -6  -6   84.71    3.33   2 0.00000 0.00000 0.00000 0.00000 0.00000 0.00000
  11  -6  -5    5.17    1.10   2 0.00000 0.00000 0.00000 0.00000 0.00000 0.00000
  10  -6  -4  196.30    2.81   2 0.00000 0.00000 0.00000 0.00000 0.00000 0.00000
   9  -6  -3 1364.00   19.43  -1 0.00000 0.00000 0.00000 0.00000 0.00000 0.00000
   4  -6   7 1364.00   19.43   2 0.00000 0.00000 0.00000 0.00000 0.00000 0.00000
   8  -6  -2 1180.64   11.46  -1 0.00000 0.00000 0.00000 0.00000 0.00000 0.00000
   4  -6   6 1180.64   11.46   2 0.00000 0.00000 0.00000 0.00000 0.00000 0.00000
   7  -6  -1 1126.75   10.92  -1 0.00000 0.00000 0.00000 0.00000 0.00000 0.00000
   4  -6   5 1126.75   10.92   2 0.00000 0.00000 0.00000 0.00000 0.00000 0.00000
   6  -6   0  111.27    1.88   2 0.00000 0.00000 0.00000 0.00000 0.00000 0.00000
   5  -6   1    3.73    0.61   2 0.00000 0.00000 0.00000 0.00000 0.00000 0.00000
   4  -6   2  527.97    4.65   2 0.00000 0.00000 0.00000 0.00000 0.00000 0.00000
   3  -6   3   59.84    1.55   2 0.00000 0.00000 0.00000 0.00000 0.00000 0.00000
   2  -6   4   52.01    1.53   2 0.00000 0.00000 0.00000 0.00000 0.00000 0.00000
   0  -6   6  227.41    4.94  -1 0.00000 0.00000 0.00000 0.00000 0.00000 0.00000
  -5   6   4  227.41    4.94   2 0.00000 0.00000 0.00000 0.00000 0.00000 0.00000
  -1  -6   7  460.73    7.79  -1 0.00000 0.00000 0.00000 0.00000 0.00000 0.00000
  -5   6   5  460.73    7.79   2 0.00000 0.00000 0.00000 0.00000 0.00000 0.00000
  -2  -6   8  303.62    3.17   2 0.00000 0.00000 0.00000 0.00000 0.00000 0.00000
  -3  -6   9  274.25    3.17   2 0.00000 0.00000 0.00000 0.00000 0.00000 0.00000
  -4  -6  10  116.69    2.36   2 0.00000 0.00000 0.00000 0.00000 0.00000 0.00000
  -5  -6  11  158.49    2.77   2 0.00000 0.00000 0.00000 0.00000 0.00000 0.00000
  -6  -6  12   10.10    1.71   2 0.00000 0.00000 0.00000 0.00000 0.00000 0.00000
  -7  -6  13   45.65    6.16  -1 0.00000 0.00000 0.00000 0.00000 0.00000 0.00000
  -6   6  13   45.65    6.16   2 0.00000 0.00000 0.00000 0.00000 0.00000 0.00000
  14  -7  -7   21.78    2.54   2 0.00000 0.00000 0.00000 0.00000 0.00000 0.00000
  13  -7  -6  184.86    7.75  -1 0.00000 0.00000 0.00000 0.00000 0.00000 0.00000
   4  -7  12  184.86    7.75   2 0.00000 0.00000 0.00000 0.00000 0.00000 0.00000
  12  -7  -5   18.22    1.72   2 0.00000 0.00000 0.00000 0.00000 0.00000 0.00000
  11  -7  -4   14.23    1.24   2 0.00000 0.00000 0.00000 0.00000 0.00000 0.00000
  10  -7  -3  208.59    2.87   2 0.00000 0.00000 0.00000 0.00000 0.00000 0.00000
   9  -7  -2   64.76    2.06   2 0.00000 0.00000 0.00000 0.00000 0.00000 0.00000
   8  -7  -1    4.84    0.94   2 0.00000 0.00000 0.00000 0.00000 0.00000 0.00000
   7  -7   0  734.78    8.04  -1 0.00000 0.00000 0.00000 0.00000 0.00000 0.00000
   5  -7   4  734.78    8.04   2 0.00000 0.00000 0.00000 0.00000 0.00000 0.00000
   6  -7   1  636.52    5.72  -1 0.00000 0.00000 0.00000 0.00000 0.00000 0.00000
   5  -7   3  636.52    5.72   2 0.00000 0.00000 0.00000 0.00000 0.00000 0.00000
   5  -7   2   50.50    1.64   2 0.00000 0.00000 0.00000 0.00000 0.00000 0.00000
   4  -7   3  108.26    2.08   2 0.00000 0.00000 0.00000 0.00000 0.00000 0.00000
   3  -7   4   47.89    1.59   2 0.00000 0.00000 0.00000 0.00000 0.00000 0.00000
   2  -7   5   70.86    1.86   2 0.00000 0.00000 0.00000 0.00000 0.00000 0.00000
   1  -7   6  357.24    3.31   2 0.00000 0.00000 0.00000 0.00000 0.00000 0.00000
   0  -7   7   60.97    1.60   2 0.00000 0.00000 0.00000 0.00000 0.00000 0.00000
  -1  -7   8   33.54    3.60  -1 0.00000 0.00000 0.00000 0.00000 0.00000 0.00000
  -6   7   6   33.54    3.60   2 0.00000 0.00000 0.00000 0.00000 0.00000 0.00000
  -2  -7   9  518.67    6.68  -1 0.00000 0.00000 0.00000 0.00000 0.00000 0.00000
  -6   7   7  518.67    6.68   2 0.00000 0.00000 0.00000 0.00000 0.00000 0.00000
  -3  -7  10  456.76    6.76  -1 0.00000 0.00000 0.00000 0.00000 0.00000 0.00000
  -6   7   8  456.76    6.76   2 0.00000 0.00000 0.00000 0.00000 0.00000 0.00000
  -3  -7  10   81.00    2.42   2 0.00000 0.00000 0.00000 0.00000 0.00000 0.00000
  -4  -7  11    8.46    1.37   2 0.00000 0.00000 0.00000 0.00000 0.00000 0.00000
  -5  -7  12   24.67    2.00   2 0.00000 0.00000 0.00000 0.00000 0.00000 0.00000
  -6  -7  13   72.17    2.75   2 0.00000 0.00000 0.00000 0.00000 0.00000 0.00000
  13  -8  -5  118.63    5.77  -1 0.00000 0.00000 0.00000 0.00000 0.00000 0.00000
   5  -8  11  118.63    5.77   2 0.00000 0.00000 0.00000 0.00000 0.00000 0.00000
  12  -8  -4   12.06    5.06  -1 0.00000 0.00000 0.00000 0.00000 0.00000 0.00000
   5  -8  10   12.06    5.06   2 0.00000 0.00000 0.00000 0.00000 0.00000 0.00000
  11  -8  -3  183.01    2.83   2 0.00000 0.00000 0.00000 0.00000 0.00000 0.00000
  10  -8  -2  110.13    2.53   2 0.00000 0.00000 0.00000 0.00000 0.00000 0.00000
   9  -8  -1    1.44    1.25   2 0.00000 0.00000 0.00000 0.00000 0.00000 0.00000
   8  -8   0   15.22    1.56   2 0.00000 0.00000 0.00000 0.00000 0.00000 0.00000
   7  -8   1   -0.49    1.12   2 0.00000 0.00000 0.00000 0.00000 0.00000 0.00000
   6  -8   2  687.22    7.80  -1 0.00000 0.00000 0.00000 0.00000 0.00000 0.00000
   6  -8   2  687.22    7.80   2 0.00000 0.00000 0.00000 0.00000 0.00000 0.00000
   5  -8   3   48.77    2.21  -1 0.00000 0.00000 0.00000 0.00000 0.00000 0.00000
  -6   8  -1   48.77    2.21   2 0.00000 0.00000 0.00000 0.00000 0.00000 0.00000
   4  -8   4  100.93    4.39  -1 0.00000 0.00000 0.00000 0.00000 0.00000 0.00000
  -6   8   0  100.93    4.39   2 0.00000 0.00000 0.00000 0.00000 0.00000 0.00000
   3  -8   5  380.43    4.16   2 0.00000 0.00000 0.00000 0.00000 0.00000 0.00000
   2  -8   6    0.26    0.93   2 0.00000 0.00000 0.00000 0.00000 0.00000 0.00000
   1  -8   7  152.97    2.27   2 0.00000 0.00000 0.00000 0.00000 0.00000 0.00000
   0  -8   8   20.78    1.76   2 0.00000 0.00000 0.00000 0.00000 0.00000 0.00000
  -1  -8   9  203.63    3.31   2 0.00000 0.00000 0.00000 0.00000 0.00000 0.00000
  -2  -8  10  264.63    4.39  -1 0.00000 0.00000 0.00000 0.00000 0.00000 0.00000
  -7   8   8  264.63    4.39   2 0.00000 0.00000 0.00000 0.00000 0.00000 0.00000
  -3  -8  11  198.24    4.93  -1 0.00000 0.00000 0.00000 0.00000 0.00000 0.00000
  -7   8   9  198.24    4.93   2 0.00000 0.00000 0.00000 0.00000 0.00000 0.00000
  -4  -8  12   21.82    6.05  -1 0.00000 0.00000 0.00000 0.00000 0.00000 0.00000
  -7   8  10   21.82    6.05   2 0.00000 0.00000 0.00000 0.00000 0.00000 0.00000
  -5  -8  13   39.00    2.43   2 0.00000 0.00000 0.00000 0.00000 0.00000 0.00000
  13  -9  -4    1.11    6.20  -1 0.00000 0.00000 0.00000 0.00000 0.00000 0.00000
   6  -9  10    1.11    6.20   2 0.00000 0.00000 0.00000 0.00000 0.00000 0.00000
  12  -9  -3  123.76    6.17  -1 0.00000 0.00000 0.00000 0.00000 0.00000 0.00000
   6  -9   9  123.76    6.17   2 0.00000 0.00000 0.00000 0.00000 0.00000 0.00000
  11  -9  -2  702.42   13.08  -1 0.00000 0.00000 0.00000 0.00000 0.00000 0.00000
   6  -9   8  702.42   13.08   2 0.00000 0.00000 0.00000 0.00000 0.00000 0.00000
  10  -9  -1    3.63    1.46   2 0.00000 0.00000 0.00000 0.00000 0.00000 0.00000
   9  -9   0   29.70    2.34   2 0.00000 0.00000 0.00000 0.00000 0.00000 0.00000
   8  -9   1   15.97    1.65   2 0.00000 0.00000 0.00000 0.00000 0.00000 0.00000
   7  -9   2    0.77    1.19   2 0.00000 0.00000 0.00000 0.00000 0.00000 0.00000
   6  -9   3  141.49    2.74   2 0.00000 0.00000 0.00000 0.00000 0.00000 0.00000
   5  -9   4  110.75    2.45   2 0.00000 0.00000 0.00000 0.00000 0.00000 0.00000
   4  -9   5   98.25    2.82  -1 0.00000 0.00000 0.00000 0.00000 0.00000 0.00000
  -7   9   1   98.25    2.82   2 0.00000 0.00000 0.00000 0.00000 0.00000 0.00000
   3  -9   6  329.10    7.22  -1 0.00000 0.00000 0.00000 0.00000 0.00000 0.00000
  -7   9   2  329.10    7.22   2 0.00000 0.00000 0.00000 0.00000 0.00000 0.00000
   2  -9   7    9.48    1.20   2 0.00000 0.00000 0.00000 0.00000 0.00000 0.00000
   1  -9   8   20.25    1.54   2 0.00000 0.00000 0.00000 0.00000 0.00000 0.00000
   0  -9   9  154.59    3.02   2 0.00000 0.00000 0.00000 0.00000 0.00000 0.00000
  -1  -9  10  168.75    3.22   2 0.00000 0.00000 0.00000 0.00000 0.00000 0.00000
  -2  -9  11   97.40    2.75   2 0.00000 0.00000 0.00000 0.00000 0.00000 0.00000
  -3  -9  12  110.16    7.18  -1 0.00000 0.00000 0.00000 0.00000 0.00000 0.00000
  -8   9  10  110.16    7.18   2 0.00000 0.00000 0.00000 0.00000 0.00000 0.00000
  -4  -9  13   43.48    5.23  -1 0.00000 0.00000 0.00000 0.00000 0.00000 0.00000
  -8   9  11   43.48    5.23   2 0.00000 0.00000 0.00000 0.00000 0.00000 0.00000
  13 -10  -3   88.47    3.59   2 0.00000 0.00000 0.00000 0.00000 0.00000 0.00000
  12 -10  -2   84.48    4.87   2 0.00000 0.00000 0.00000 0.00000 0.00000 0.00000
  11 -10  -1  388.85    9.66  -1 0.00000 0.00000 0.00000 0.00000 0.00000 0.00000
   7 -10   7  388.85    9.66   2 0.00000 0.00000 0.00000 0.00000 0.00000 0.00000
  10 -10   0   44.05    4.37  -1 0.00000 0.00000 0.00000 0.00000 0.00000 0.00000
   7 -10   6   44.05    4.37   2 0.00000 0.00000 0.00000 0.00000 0.00000 0.00000
   9 -10   1  151.01    4.46  -1 0.00000 0.00000 0.00000 0.00000 0.00000 0.00000
   7 -10   5  151.01    4.46   2 0.00000 0.00000 0.00000 0.00000 0.00000 0.00000
   8 -10   2  483.51    6.57   2 0.00000 0.00000 0.00000 0.00000 0.00000 0.00000
   7 -10   3   37.61    2.57   2 0.00000 0.00000 0.00000 0.00000 0.00000 0.00000
   6 -10   4   99.12    3.10   2 0.00000 0.00000 0.00000 0.00000 0.00000 0.00000
   5 -10   5  245.22    3.65   2 0.00000 0.00000 0.00000 0.00000 0.00000 0.00000
   4 -10   6   38.19    2.05   2 0.00000 0.00000 0.00000 0.00000 0.00000 0.00000
   3 -10   7  231.65    6.47  -1 0.00000 0.00000 0.00000 0.00000 0.00000 0.00000
  -8  10   3  231.65    6.47   2 0.00000 0.00000 0.00000 0.00000 0.00000 0.00000
   2 -10   8   81.43    4.42  -1 0.00000 0.00000 0.00000 0.00000 0.00000 0.00000
  -8  10   4   81.43    4.42   2 0.00000 0.00000 0.00000 0.00000 0.00000 0.00000
   1 -10   9   24.21    4.62  -1 0.00000 0.00000 0.00000 0.00000 0.00000 0.00000
  -8  10   5   24.21    4.62   2 0.00000 0.00000 0.00000 0.00000 0.00000 0.00000
   0 -10  10  217.49    3.71   2 0.00000 0.00000 0.00000 0.00000 0.00000 0.00000
  -1 -10  11   46.66    2.35   2 0.00000 0.00000 0.00000 0.00000 0.00000 0.00000
  -2 -10  12    4.68    1.49   2 0.00000 0.00000 0.00000 0.00000 0.00000 0.00000
  -3 -10  13   74.02    2.84   2 0.00000 0.00000 0.00000 0.00000 0.00000 0.00000
  12 -11  -1   25.77    3.88   2 0.00000 0.00000 0.00000 0.00000 0.00000 0.00000
  11 -11   0   98.25    3.50   2 0.00000 0.00000 0.00000 0.00000 0.00000 0.00000
  10 -11   1   70.04    3.96  -1 0.00000 0.00000 0.00000 0.00000 0.00000 0.00000
   8 -11   5   70.04    3.96   2 0.00000 0.00000 0.00000 0.00000 0.00000 0.00000
   9 -11   2   27.70    2.78  -1 0.00000 0.00000 0.00000 0.00000 0.00000 0.00000
   8 -11   4   27.70    2.78   2 0.00000 0.00000 0.00000 0.00000 0.00000 0.00000
   8 -11   3  704.77    8.79  -1 0.00000 0.00000 0.00000 0.00000 0.00000 0.00000
   8 -11   3  704.77    8.79   2 0.00000 0.00000 0.00000 0.00000 0.00000 0.00000
   7 -11   4    6.82    1.60   2 0.00000 0.00000 0.00000 0.00000 0.00000 0.00000
   6 -11   5    1.32    1.48   2 0.00000 0.00000 0.00000 0.00000 0.00000 0.00000
   5 -11   6  340.01    5.55   2 0.00000 0.00000 0.00000 0.00000 0.00000 0.00000
   4 -11   7   20.86    1.80   2 0.00000 0.00000 0.00000 0.00000 0.00000 0.00000
   3 -11   8  158.81    3.21   2 0.00000 0.00000 0.00000 0.00000 0.00000 0.00000
   2 -11   9  117.87    5.76  -1 0.00000 0.00000 0.00000 0.00000 0.00000 0.00000
  -9  11   5  117.87    5.76   2 0.00000 0.00000 0.00000 0.00000 0.00000 0.00000
   1 -11  10  139.21    5.42  -1 0.00000 0.00000 0.00000 0.00000 0.00000 0.00000
  -9  11   6  139.21    5.42   2 0.00000 0.00000 0.00000 0.00000 0.00000 0.00000
   0 -11  11  217.11    7.09  -1 0.00000 0.00000 0.00000 0.00000 0.00000 0.00000
  -9  11   7  217.11    7.09   2 0.00000 0.00000 0.00000 0.00000 0.00000 0.00000
  -1 -11  12   25.16    2.13   2 0.00000 0.00000 0.00000 0.00000 0.00000 0.00000
  -1 -11  12  104.88    6.76  -1 0.00000 0.00000 0.00000 0.00000 0.00000 0.00000
  -9  11   8  104.88    6.76   2 0.00000 0.00000 0.00000 0.00000 0.00000 0.00000
  11 -12   1   33.70    2.96   2 0.00000 0.00000 0.00000 0.00000 0.00000 0.00000
  10 -12   2  169.34    4.37   2 0.00000 0.00000 0.00000 0.00000 0.00000 0.00000
   9 -12   3   71.42    4.23  -1 0.00000 0.00000 0.00000 0.00000 0.00000 0.00000
   9 -12   3   71.42    4.23   2 0.00000 0.00000 0.00000 0.00000 0.00000 0.00000
   8 -12   4  519.81    7.39  -1 0.00000 0.00000 0.00000 0.00000 0.00000 0.00000
  -9  12  -2  519.81    7.39   2 0.00000 0.00000 0.00000 0.00000 0.00000 0.00000
   7 -12   5   84.47    5.01  -1 0.00000 0.00000 0.00000 0.00000 0.00000 0.00000
  -9  12  -1   84.47    5.01   2 0.00000 0.00000 0.00000 0.00000 0.00000 0.00000
   6 -12   6   16.75    5.30  -1 0.00000 0.00000 0.00000 0.00000 0.00000 0.00000
  -9  12   0   16.75    5.30   2 0.00000 0.00000 0.00000 0.00000 0.00000 0.00000
   5 -12   7  230.34    4.77   2 0.00000 0.00000 0.00000 0.00000 0.00000 0.00000
   4 -12   8   25.54    2.71   2 0.00000 0.00000 0.00000 0.00000 0.00000 0.00000
   3 -12   9    6.12    1.80   2 0.00000 0.00000 0.00000 0.00000 0.00000 0.00000
   2 -12  10   96.58    2.98   2 0.00000 0.00000 0.00000 0.00000 0.00000 0.00000
   1 -12  11  224.76    7.84  -1 0.00000 0.00000 0.00000 0.00000 0.00000 0.00000
 -10  12   7  224.76    7.84   2 0.00000 0.00000 0.00000 0.00000 0.00000 0.00000
  10 -13   3  102.65    5.46   2 0.00000 0.00000 0.00000 0.00000 0.00000 0.00000
   9 -13   4    1.59    1.77   2 0.00000 0.00000 0.00000 0.00000 0.00000 0.00000
   8 -13   5   31.63    3.02   2 0.00000 0.00000 0.00000 0.00000 0.00000 0.00000
   7 -13   6  158.33    6.67  -1 0.00000 0.00000 0.00000 0.00000 0.00000 0.00000
 -10  13   0  158.33    6.67   2 0.00000 0.00000 0.00000 0.00000 0.00000 0.00000
   6 -13   7   43.69    4.45  -1 0.00000 0.00000 0.00000 0.00000 0.00000 0.00000
 -10  13   1   43.69    4.45   2 0.00000 0.00000 0.00000 0.00000 0.00000 0.00000
   5 -13   8  282.70    8.30  -1 0.00000 0.00000 0.00000 0.00000 0.00000 0.00000
 -10  13   2  282.70    8.30   2 0.00000 0.00000 0.00000 0.00000 0.00000 0.00000
   4 -13   9   11.21    2.05   2 0.00000 0.00000 0.00000 0.00000 0.00000 0.00000
   3 -13  10   42.93    3.16   2 0.00000 0.00000 0.00000 0.00000 0.00000 0.00000
  -5  14  -8   93.06    5.83  -1 0.00000 0.00000 0.00000 0.00000 0.00000 0.00000
 -10  14   2   93.06    5.83   2 0.00000 0.00000 0.00000 0.00000 0.00000 0.00000
  -6  14  -7  178.62    6.70  -1 0.00000 0.00000 0.00000 0.00000 0.00000 0.00000
 -10  14   1  178.62    6.70   2 0.00000 0.00000 0.00000 0.00000 0.00000 0.00000
  -7  14  -6    0.55    5.45  -1 0.00000 0.00000 0.00000 0.00000 0.00000 0.00000
 -10  14   0    0.55    5.45   2 0.00000 0.00000 0.00000 0.00000 0.00000 0.00000
  -8  14  -5    1.94    2.51   2 0.00000 0.00000 0.00000 0.00000 0.00000 0.00000
  -2  13 -10   17.00    1.80   2 0.00000 0.00000 0.00000 0.00000 0.00000 0.00000
  -3  13  -9   60.15    2.67   2 0.00000 0.00000 0.00000 0.00000 0.00000 0.00000
  -4  13  -8   89.23    2.92   2 0.00000 0.00000 0.00000 0.00000 0.00000 0.00000
  -5  13  -7    1.29    1.70   2 0.00000 0.00000 0.00000 0.00000 0.00000 0.00000
  -6  13  -6  169.50    6.70  -1 0.00000 0.00000 0.00000 0.00000 0.00000 0.00000
  -9  13   0  169.50    6.70   2 0.00000 0.00000 0.00000 0.00000 0.00000 0.00000
  -7  13  -5   99.56    5.22  -1 0.00000 0.00000 0.00000 0.00000 0.00000 0.00000
  -9  13  -1   99.56    5.22   2 0.00000 0.00000 0.00000 0.00000 0.00000 0.00000
  -8  13  -4   17.33    4.74  -1 0.00000 0.00000 0.00000 0.00000 0.00000 0.00000
  -9  13  -2   17.33    4.74   2 0.00000 0.00000 0.00000 0.00000 0.00000 0.00000
  -9  13  -3  180.56    6.38   2 0.00000 0.00000 0.00000 0.00000 0.00000 0.00000
 -10  13  -2   21.32    3.17   2 0.00000 0.00000 0.00000 0.00000 0.00000 0.00000
 -11  13  -1    3.44    2.62   2 0.00000 0.00000 0.00000 0.00000 0.00000 0.00000
   0  12 -11  107.07    5.55  -1 0.00000 0.00000 0.00000 0.00000 0.00000 0.00000
  -9  12   7  107.07    5.55   2 0.00000 0.00000 0.00000 0.00000 0.00000 0.00000
  -1  12 -10  212.35    6.88  -1 0.00000 0.00000 0.00000 0.00000 0.00000 0.00000
  -9  12   6  212.35    6.88   2 0.00000 0.00000 0.00000 0.00000 0.00000 0.00000
  -2  12  -9   53.71    5.37  -1 0.00000 0.00000 0.00000 0.00000 0.00000 0.00000
  -9  12   5   53.71    5.37   2 0.00000 0.00000 0.00000 0.00000 0.00000 0.00000
  -3  12  -8    8.31    1.45   2 0.00000 0.00000 0.00000 0.00000 0.00000 0.00000
  -4  12  -7  369.74    4.88   2 0.00000 0.00000 0.00000 0.00000 0.00000 0.00000
  -5  12  -6   12.08    1.49   2 0.00000 0.00000 0.00000 0.00000 0.00000 0.00000
  -6  12  -5  123.76    3.62   2 0.00000 0.00000 0.00000 0.00000 0.00000 0.00000
  -7  12  -4  391.99    9.27  -1 0.00000 0.00000 0.00000 0.00000 0.00000 0.00000
  -8  12  -2  391.99    9.27   2 0.00000 0.00000 0.00000 0.00000 0.00000 0.00000
  -8  12  -3  101.46    3.75  -1 0.00000 0.00000 0.00000 0.00000 0.00000 0.00000
  -8  12  -3  101.46    3.75   2 0.00000 0.00000 0.00000 0.00000 0.00000 0.00000
  -9  12  -2  509.18    7.43  -1 0.00000 0.00000 0.00000 0.00000 0.00000 0.00000
   8 -12   4  509.18    7.43   2 0.00000 0.00000 0.00000 0.00000 0.00000 0.00000
 -10  12  -1  169.60    5.10  -1 0.00000 0.00000 0.00000 0.00000 0.00000 0.00000
   8 -12   5  169.60    5.10   2 0.00000 0.00000 0.00000 0.00000 0.00000 0.00000
 -11  12   0    3.84    2.46   2 0.00000 0.00000 0.00000 0.00000 0.00000 0.00000
 -12  12   1   74.79    5.06   2 0.00000 0.00000 0.00000 0.00000 0.00000 0.00000
   2  11 -12   66.03    2.70   2 0.00000 0.00000 0.00000 0.00000 0.00000 0.00000
   1  11 -11   46.27    2.40   2 0.00000 0.00000 0.00000 0.00000 0.00000 0.00000
   0  11 -10   10.68    1.49   2 0.00000 0.00000 0.00000 0.00000 0.00000 0.00000
  -1  11  -9  102.88    5.42  -1 0.00000 0.00000 0.00000 0.00000 0.00000 0.00000
  -8  11   5  102.88    5.42   2 0.00000 0.00000 0.00000 0.00000 0.00000 0.00000
  -2  11  -8  201.25    5.98  -1 0.00000 0.00000 0.00000 0.00000 0.00000 0.00000
  -8  11   4  201.25    5.98   2 0.00000 0.00000 0.00000 0.00000 0.00000 0.00000
  -3  11  -7  184.04    6.06  -1 0.00000 0.00000 0.00000 0.00000 0.00000 0.00000
  -8  11   3  184.04    6.06   2 0.00000 0.00000 0.00000 0.00000 0.00000 0.00000
  -4  11  -6  342.68    4.45   2 0.00000 0.00000 0.00000 0.00000 0.00000 0.00000
  -5  11  -5   69.80    2.38   2 0.00000 0.00000 0.00000 0.00000 0.00000 0.00000
  -6  11  -4   58.24    2.74   2 0.00000 0.00000 0.00000 0.00000 0.00000 0.00000
  -7  11  -3  343.73    5.47   2 0.00000 0.00000 0.00000 0.00000 0.00000 0.00000
  -8  11  -2    8.30    1.61   2 0.00000 0.00000 0.00000 0.00000 0.00000 0.00000
  -9  11  -1   87.73    3.79  -1 0.00000 0.00000 0.00000 0.00000 0.00000 0.00000
   7 -11   5   87.73    3.79   2 0.00000 0.00000 0.00000 0.00000 0.00000 0.00000
 -10  11   0  333.08    5.84  -1 0.00000 0.00000 0.00000 0.00000 0.00000 0.00000
   7 -11   6  333.08    5.84   2 0.00000 0.00000 0.00000 0.00000 0.00000 0.00000
 -11  11   1   86.35    6.05  -1 0.00000 0.00000 0.00000 0.00000 0.00000 0.00000
   7 -11   7   86.35    6.05   2 0.00000 0.00000 0.00000 0.00000 0.00000 0.00000
 -12  11   2  124.11    5.67   2 0.00000 0.00000 0.00000 0.00000 0.00000 0.00000
 -13  11   3   29.23    4.32   2 0.00000 0.00000 0.00000 0.00000 0.00000 0.00000
   2  10 -11   78.16    2.64   2 0.00000 0.00000 0.00000 0.00000 0.00000 0.00000
   1  10 -10  242.67    3.89   2 0.00000 0.00000 0.00000 0.00000 0.00000 0.00000
   0  10  -9   83.15    2.50   2 0.00000 0.00000 0.00000 0.00000 0.00000 0.00000
  -1  10  -8   10.85    1.32   2 0.00000 0.00000 0.00000 0.00000 0.00000 0.00000
  -2  10  -7  533.97    9.92  -1 0.00000 0.00000 0.00000 0.00000 0.00000 0.00000
  -7  10   3  533.97    9.92   2 0.00000 0.00000 0.00000 0.00000 0.00000 0.00000
  -3  10  -6  108.39    4.44  -1 0.00000 0.00000 0.00000 0.00000 0.00000 0.00000
  -7  10   2  108.39    4.44   2 0.00000 0.00000 0.00000 0.00000 0.00000 0.00000
  -4  10  -5  193.73    5.82  -1 0.00000 0.00000 0.00000 0.00000 0.00000 0.00000
  -7  10   1  193.73    5.82   2 0.00000 0.00000 0.00000 0.00000 0.00000 0.00000
  -5  10  -4   92.47    2.41   2 0.00000 0.00000 0.00000 0.00000 0.00000 0.00000
  -6  10  -3    4.65    1.39   2 0.00000 0.00000 0.00000 0.00000 0.00000 0.00000
  -7  10  -2  534.51    6.78   2 0.00000 0.00000 0.00000 0.00000 0.00000 0.00000
  -8  10  -1   20.47    1.96   2 0.00000 0.00000 0.00000 0.00000 0.00000 0.00000
  -9  10   0    9.74    1.58   2 0.00000 0.00000 0.00000 0.00000 0.00000 0.00000
 -10  10   1  497.86    7.46  -1 0.00000 0.00000 0.00000 0.00000 0.00000 0.00000
   6 -10   7  497.86    7.46   2 0.00000 0.00000 0.00000 0.00000 0.00000 0.00000
 -11  10   2   67.86    5.05  -1 0.00000 0.00000 0.00000 0.00000 0.00000 0.00000
   6 -10   8   67.86    5.05   2 0.00000 0.00000 0.00000 0.00000 0.00000 0.00000
 -12  10   3   64.94    5.69  -1 0.00000 0.00000 0.00000 0.00000 0.00000 0.00000
   6 -10   9   64.94    5.69   2 0.00000 0.00000 0.00000 0.00000 0.00000 0.00000
   5   9 -13   55.31    2.63   2 0.00000 0.00000 0.00000 0.00000 0.00000 0.00000
   4   9 -12  154.18    5.16  -1 0.00000 0.00000 0.00000 0.00000 0.00000 0.00000
  -7   9  10  154.18    5.16   2 0.00000 0.00000 0.00000 0.00000 0.00000 0.00000
   3   9 -11   74.57    3.72  -1 0.00000 0.00000 0.00000 0.00000 0.00000 0.00000
  -7   9   9   74.57    3.72   2 0.00000 0.00000 0.00000 0.00000 0.00000 0.00000
   2   9 -10  201.45    4.14  -1 0.00000 0.00000 0.00000 0.00000 0.00000 0.00000
  -7   9   8  201.45    4.14   2 0.00000 0.00000 0.00000 0.00000 0.00000 0.00000
   1   9  -9   95.62    2.53   2 0.00000 0.00000 0.00000 0.00000 0.00000 0.00000
   0   9  -8   -0.19    1.03   2 0.00000 0.00000 0.00000 0.00000 0.00000 0.00000
  -1   9  -7   -0.27    1.00   2 0.00000 0.00000 0.00000 0.00000 0.00000 0.00000
  -2   9  -6  429.91    4.68   2 0.00000 0.00000 0.00000 0.00000 0.00000 0.00000
  -3   9  -5   26.69    1.74   2 0.00000 0.00000 0.00000 0.00000 0.00000 0.00000
  -4   9  -4   82.86    2.86  -1 0.00000 0.00000 0.00000 0.00000 0.00000 0.00000
  -6   9   0   82.86    2.86   2 0.00000 0.00000 0.00000 0.00000 0.00000 0.00000
  -5   9  -3  489.92    6.06  -1 0.00000 0.00000 0.00000 0.00000 0.00000 0.00000
  -6   9  -1  489.92    6.06   2 0.00000 0.00000 0.00000 0.00000 0.00000 0.00000
  -6   9  -2   31.31    2.22   2 0.00000 0.00000 0.00000 0.00000 0.00000 0.00000
  -7   9  -1  130.23    3.17   2 0.00000 0.00000 0.00000 0.00000 0.00000 0.00000
  -8   9   0   28.96    2.27   2 0.00000 0.00000 0.00000 0.00000 0.00000 0.00000
  -9   9   1    1.72    1.31   2 0.00000 0.00000 0.00000 0.00000 0.00000 0.00000
 -10   9   2  180.98    3.95   2 0.00000 0.00000 0.00000 0.00000 0.00000 0.00000
 -11   9   3   -0.11    1.47   2 0.00000 0.00000 0.00000 0.00000 0.00000 0.00000
 -12   9   4   35.98    4.85  -1 0.00000 0.00000 0.00000 0.00000 0.00000 0.00000
   5  -9  10   35.98    4.85   2 0.00000 0.00000 0.00000 0.00000 0.00000 0.00000
 -13   9   5  315.28    8.99  -1 0.00000 0.00000 0.00000 0.00000 0.00000 0.00000
   5  -9  11  315.28    8.99   2 0.00000 0.00000 0.00000 0.00000 0.00000 0.00000
   6   8 -13   15.42    1.75   2 0.00000 0.00000 0.00000 0.00000 0.00000 0.00000
   5   8 -12    0.61    1.36   2 0.00000 0.00000 0.00000 0.00000 0.00000 0.00000
   4   8 -11   10.05    1.46   2 0.00000 0.00000 0.00000 0.00000 0.00000 0.00000
   3   8 -10  173.52    5.11  -1 0.00000 0.00000 0.00000 0.00000 0.00000 0.00000
  -6   8   8  173.52    5.11   2 0.00000 0.00000 0.00000 0.00000 0.00000 0.00000
   2   8  -9  276.74    4.64  -1 0.00000 0.00000 0.00000 0.00000 0.00000 0.00000
  -6   8   7  276.74    4.64   2 0.00000 0.00000 0.00000 0.00000 0.00000 0.00000
   1   8  -8   77.41    3.36  -1 0.00000 0.00000 0.00000 0.00000 0.00000 0.00000
  -6   8   6   77.41    3.36   2 0.00000 0.00000 0.00000 0.00000 0.00000 0.00000
   0   8  -7  137.17    2.59   2 0.00000 0.00000 0.00000 0.00000 0.00000 0.00000
  -1   8  -6    7.08    1.02   2 0.00000 0.00000 0.00000 0.00000 0.00000 0.00000
  -2   8  -5  246.04    3.20   2 0.00000 0.00000 0.00000 0.00000 0.00000 0.00000
  -3   8  -4    1.95    0.85   2 0.00000 0.00000 0.00000 0.00000 0.00000 0.00000
  -4   8  -3   61.99    1.83   2 0.00000 0.00000 0.00000 0.00000 0.00000 0.00000
  -5   8  -2 1066.55   14.79  -1 0.00000 0.00000 0.00000 0.00000 0.00000 0.00000
  -5   8  -2 1066.55   14.79   2 0.00000 0.00000 0.00000 0.00000 0.00000 0.00000
  -6   8  -1   55.81    1.85  -1 0.00000 0.00000 0.00000 0.00000 0.00000 0.00000
   5  -8   3   55.81    1.85   2 0.00000 0.00000 0.00000 0.00000 0.00000 0.00000
  -7   8   0  307.10    4.04  -1 0.00000 0.00000 0.00000 0.00000 0.00000 0.00000
   5  -8   4  307.10    4.04   2 0.00000 0.00000 0.00000 0.00000 0.00000 0.00000
  -8   8   1  248.45    4.14   2 0.00000 0.00000 0.00000 0.00000 0.00000 0.00000
  -9   8   2   81.82    2.16   2 0.00000 0.00000 0.00000 0.00000 0.00000 0.00000
 -10   8   3    8.13    1.05   2 0.00000 0.00000 0.00000 0.00000 0.00000 0.00000
 -11   8   4   -0.85    1.01   2 0.00000 0.00000 0.00000 0.00000 0.00000 0.00000
 -12   8   5   -0.86    1.08   2 0.00000 0.00000 0.00000 0.00000 0.00000 0.00000
 -13   8   6  215.78    8.09  -1 0.00000 0.00000 0.00000 0.00000 0.00000 0.00000
   4  -8  12  215.78    8.09   2 0.00000 0.00000 0.00000 0.00000 0.00000 0.00000
   6   7 -12   82.63    2.38   2 0.00000 0.00000 0.00000 0.00000 0.00000 0.00000
   5   7 -11  117.83    2.52   2 0.00000 0.00000 0.00000 0.00000 0.00000 0.00000
   4   7 -10    6.37    1.29   2 0.00000 0.00000 0.00000 0.00000 0.00000 0.00000
   3   7  -9  116.03    2.60   2 0.00000 0.00000 0.00000 0.00000 0.00000 0.00000
   2   7  -8   56.70    4.48  -1 0.00000 0.00000 0.00000 0.00000 0.00000 0.00000
  -5   7   6   56.70    4.48   2 0.00000 0.00000 0.00000 0.00000 0.00000 0.00000
   2   7  -8   60.44    1.72   2 0.00000 0.00000 0.00000 0.00000 0.00000 0.00000
   1   7  -7  513.57    6.21  -1 0.00000 0.00000 0.00000 0.00000 0.00000 0.00000
  -5   7   5  513.57    6.21   2 0.00000 0.00000 0.00000 0.00000 0.00000 0.00000
   0   7  -6 1766.26   21.81  -1 0.00000 0.00000 0.00000 0.00000 0.00000 0.00000
  -5   7   4 1766.26   21.81   2 0.00000 0.00000 0.00000 0.00000 0.00000 0.00000
  -1   7  -5   54.90    1.71   2 0.00000 0.00000 0.00000 0.00000 0.00000 0.00000
  -2   7  -4   38.68    1.48   2 0.00000 0.00000 0.00000 0.00000 0.00000 0.00000
  -3   7  -3   18.31    1.31   2 0.00000 0.00000 0.00000 0.00000 0.00000 0.00000
  -4   7  -2  133.81    2.18   2 0.00000 0.00000 0.00000 0.00000 0.00000 0.00000
  -5   7  -1  725.42    7.39   2 0.00000 0.00000 0.00000 0.00000 0.00000 0.00000
  -6   7   0   18.24    1.11   2 0.00000 0.00000 0.00000 0.00000 0.00000 0.00000
  -7   7   1   12.48    1.63  -1 0.00000 0.00000 0.00000 0.00000 0.00000 0.00000
   4  -7   5   12.48    1.63   2 0.00000 0.00000 0.00000 0.00000 0.00000 0.00000
  -8   7   2 1691.37   15.61  -1 0.00000 0.00000 0.00000 0.00000 0.00000 0.00000
   4  -7   6 1691.37   15.61   2 0.00000 0.00000 0.00000 0.00000 0.00000 0.00000
  -9   7   3  188.05    2.98   2 0.00000 0.00000 0.00000 0.00000 0.00000 0.00000
 -10   7   4   91.95    2.14   2 0.00000 0.00000 0.00000 0.00000 0.00000 0.00000
 -11   7   5   -0.26    1.03   2 0.00000 0.00000 0.00000 0.00000 0.00000 0.00000
 -12   7   6  127.00    3.12   2 0.00000 0.00000 0.00000 0.00000 0.00000 0.00000
 -13   7   7   28.98    2.43   2 0.00000 0.00000 0.00000 0.00000 0.00000 0.00000
   8   6 -13   46.17    6.22  -1 0.00000 0.00000 0.00000 0.00000 0.00000 0.00000
  -5   6  13   46.17    6.22   2 0.00000 0.00000 0.00000 0.00000 0.00000 0.00000
   7   6 -12  201.08    7.12  -1 0.00000 0.00000 0.00000 0.00000 0.00000 0.00000
  -5   6  12  201.08    7.12   2 0.00000 0.00000 0.00000 0.00000 0.00000 0.00000
   6   6 -11  213.08    5.58  -1 0.00000 0.00000 0.00000 0.00000 0.00000 0.00000
  -5   6  11  213.08    5.58   2 0.00000 0.00000 0.00000 0.00000 0.00000 0.00000
   5   6 -10  156.10    3.45   2 0.00000 0.00000 0.00000 0.00000 0.00000 0.00000
   4   6  -9  367.10    4.18   2 0.00000 0.00000 0.00000 0.00000 0.00000 0.00000
   3   6  -8  242.71    3.17   2 0.00000 0.00000 0.00000 0.00000 0.00000 0.00000
   2   6  -7   43.44    1.46   2 0.00000 0.00000 0.00000 0.00000 0.00000 0.00000
   1   6  -6   36.23    1.31   2 0.00000 0.00000 0.00000 0.00000 0.00000 0.00000
   0   6  -5 2480.63   29.07  -1 0.00000 0.00000 0.00000 0.00000 0.00000 0.00000
  -4   6   3 2480.63   29.07   2 0.00000 0.00000 0.00000 0.00000 0.00000 0.00000
  -1   6  -4   91.80    1.87  -1 0.00000 0.00000 0.00000 0.00000 0.00000 0.00000
  -4   6   2   91.80    1.87   2 0.00000 0.00000 0.00000 0.00000 0.00000 0.00000
  -2   6  -3  356.00    3.48   2 0.00000 0.00000 0.00000 0.00000 0.00000 0.00000
  -3   6  -2  322.86    3.24   2 0.00000 0.00000 0.00000 0.00000 0.00000 0.00000
  -4   6  -1    3.75    0.83   2 0.00000 0.00000 0.00000 0.00000 0.00000 0.00000
  -5   6   0  152.32    2.00   2 0.00000 0.00000 0.00000 0.00000 0.00000 0.00000
  -6   6   1  244.18    2.78   2 0.00000 0.00000 0.00000 0.00000 0.00000 0.00000
  -7   6   2  379.93    3.88   2 0.00000 0.00000 0.00000 0.00000 0.00000 0.00000
  -8   6   3  711.25    7.94  -1 0.00000 0.00000 0.00000 0.00000 0.00000 0.00000
   3  -6   7  711.25    7.94   2 0.00000 0.00000 0.00000 0.00000 0.00000 0.00000
  -9   6   4  514.80    6.53  -1 0.00000 0.00000 0.00000 0.00000 0.00000 0.00000
   3  -6   8  514.80    6.53   2 0.00000 0.00000 0.00000 0.00000 0.00000 0.00000
 -10   6   5   33.52    4.97  -1 0.00000 0.00000 0.00000 0.00000 0.00000 0.00000
   3  -6   9   33.52    4.97   2 0.00000 0.00000 0.00000 0.00000 0.00000 0.00000
 -11   6   6   46.22    2.33   2 0.00000 0.00000 0.00000 0.00000 0.00000 0.00000
 -12   6   7  213.52    3.83   2 0.00000 0.00000 0.00000 0.00000 0.00000 0.00000
 -13   6   8    4.89    1.95   2 0.00000 0.00000 0.00000 0.00000 0.00000 0.00000
   9   5 -13   87.65    2.95   2 0.00000 0.00000 0.00000 0.00000 0.00000 0.00000
   8   5 -12   20.78    1.83   2 0.00000 0.00000 0.00000 0.00000 0.00000 0.00000
   7   5 -11   -6.65    5.67  -1 0.00000 0.00000 0.00000 0.00000 0.00000 0.00000
  -4   5  11   -6.65    5.67   2 0.00000 0.00000 0.00000 0.00000 0.00000 0.00000
   6   5 -10  158.80    4.42  -1 0.00000 0.00000 0.00000 0.00000 0.00000 0.00000
  -4   5  10  158.80    4.42   2 0.00000 0.00000 0.00000 0.00000 0.00000 0.00000
   5   5  -9  619.47    8.48  -1 0.00000 0.00000 0.00000 0.00000 0.00000 0.00000
  -4   5   9  619.47    8.48   2 0.00000 0.00000 0.00000 0.00000 0.00000 0.00000
   4   5  -8  109.14    2.31   2 0.00000 0.00000 0.00000 0.00000 0.00000 0.00000
   3   5  -7  111.36    2.13   2 0.00000 0.00000 0.00000 0.00000 0.00000 0.00000
   2   5  -6  231.99    2.75   2 0.00000 0.00000 0.00000 0.00000 0.00000 0.00000
   1   5  -5  333.08    2.88   2 0.00000 0.00000 0.00000 0.00000 0.00000 0.00000
   0   5  -4  737.78    4.99   2 0.00000 0.00000 0.00000 0.00000 0.00000 0.00000
  -1   5  -3   39.37    1.34   2 0.00000 0.00000 0.00000 0.00000 0.00000 0.00000
  -2   5  -2  121.89    1.51  -1 0.00000 0.00000 0.00000 0.00000 0.00000 0.00000
  -3   5   0  121.89    1.51   2 0.00000 0.00000 0.00000 0.00000 0.00000 0.00000
  -3   5  -1 1820.10   12.43   2 0.00000 0.00000 0.00000 0.00000 0.00000 0.00000
  -4   5   0   10.79    0.81   2 0.00000 0.00000 0.00000 0.00000 0.00000 0.00000
  -5   5   1   36.26    1.24   2 0.00000 0.00000 0.00000 0.00000 0.00000 0.00000
  -6   5   2  106.35    1.87   2 0.00000 0.00000 0.00000 0.00000 0.00000 0.00000
  -7   5   3  323.58    3.51   2 0.00000 0.00000 0.00000 0.00000 0.00000 0.00000
  -8   5   4  257.98    2.89   2 0.00000 0.00000 0.00000 0.00000 0.00000 0.00000
  -9   5   5  111.09    3.03  -1 0.00000 0.00000 0.00000 0.00000 0.00000 0.00000
   2  -5   9  111.09    3.03   2 0.00000 0.00000 0.00000 0.00000 0.00000 0.00000
 -10   5   6  688.14    8.61  -1 0.00000 0.00000 0.00000 0.00000 0.00000 0.00000
   2  -5  10  688.14    8.61   2 0.00000 0.00000 0.00000 0.00000 0.00000 0.00000
 -11   5   7  491.04    7.52  -1 0.00000 0.00000 0.00000 0.00000 0.00000 0.00000
   2  -5  11  491.04    7.52   2 0.00000 0.00000 0.00000 0.00000 0.00000 0.00000
 -12   5   8  149.68    3.38   2 0.00000 0.00000 0.00000 0.00000 0.00000 0.00000
 -13   5   9   -0.11    1.88   2 0.00000 0.00000 0.00000 0.00000 0.00000 0.00000
   9   4 -12  237.69    3.52   2 0.00000 0.00000 0.00000 0.00000 0.00000 0.00000
   8   4 -11   45.42    2.02   2 0.00000 0.00000 0.00000 0.00000 0.00000 0.00000
   7   4 -10   25.18    1.77   2 0.00000 0.00000 0.00000 0.00000 0.00000 0.00000
   6   4  -9   61.79    2.13   2 0.00000 0.00000 0.00000 0.00000 0.00000 0.00000
   5   4  -8  258.91    5.07  -1 0.00000 0.00000 0.00000 0.00000 0.00000 0.00000
  -3   4   8  258.91    5.07   2 0.00000 0.00000 0.00000 0.00000 0.00000 0.00000
   4   4  -7    7.24    1.50  -1 0.00000 0.00000 0.00000 0.00000 0.00000 0.00000
  -3   4   7    7.24    1.50   2 0.00000 0.00000 0.00000 0.00000 0.00000 0.00000
   3   4  -6    3.05    0.75   2 0.00000 0.00000 0.00000 0.00000 0.00000 0.00000
   3   4  -6   64.02    4.23  -1 0.00000 0.00000 0.00000 0.00000 0.00000 0.00000
  -3   4   6   64.02    4.23   2 0.00000 0.00000 0.00000 0.00000 0.00000 0.00000
   2   4  -5 1026.53    7.65   2 0.00000 0.00000 0.00000 0.00000 0.00000 0.00000
   1   4  -4   31.10    1.18   2 0.00000 0.00000 0.00000 0.00000 0.00000 0.00000
   0   4  -3  233.11    2.02   2 0.00000 0.00000 0.00000 0.00000 0.00000 0.00000
  -1   4  -2   61.44    1.30   2 0.00000 0.00000 0.00000 0.00000 0.00000 0.00000
  -2   4  -1   20.16    1.00   2 0.00000 0.00000 0.00000 0.00000 0.00000 0.00000
  -3   4   0  711.62    6.67  -1 0.00000 0.00000 0.00000 0.00000 0.00000 0.00000
   2  -4   2  711.62    6.67   2 0.00000 0.00000 0.00000 0.00000 0.00000 0.00000
  -3   4   0  505.96    3.90   2 0.00000 0.00000 0.00000 0.00000 0.00000 0.00000
  -4   4   1   29.88    1.49  -1 0.00000 0.00000 0.00000 0.00000 0.00000 0.00000
   2  -4   3   29.88    1.49   2 0.00000 0.00000 0.00000 0.00000 0.00000 0.00000
  -5   4   2   69.30    1.87   2 0.00000 0.00000 0.00000 0.00000 0.00000 0.00000
  -6   4   3  219.68    3.22   2 0.00000 0.00000 0.00000 0.00000 0.00000 0.00000
  -7   4   4  291.29    3.32   2 0.00000 0.00000 0.00000 0.00000 0.00000 0.00000
  -8   4   5  123.35    2.45   2 0.00000 0.00000 0.00000 0.00000 0.00000 0.00000
  -9   4   6    3.04    1.12   2 0.00000 0.00000 0.00000 0.00000 0.00000 0.00000
 -10   4   7  347.26    6.24  -1 0.00000 0.00000 0.00000 0.00000 0.00000 0.00000
   1  -4  11  347.26    6.24   2 0.00000 0.00000 0.00000 0.00000 0.00000 0.00000
 -11   4   8  106.77    3.88  -1 0.00000 0.00000 0.00000 0.00000 0.00000 0.00000
   1  -4  12  106.77    3.88   2 0.00000 0.00000 0.00000 0.00000 0.00000 0.00000
 -12   4   9  182.75    4.92  -1 0.00000 0.00000 0.00000 0.00000 0.00000 0.00000
   1  -4  13  182.75    4.92   2 0.00000 0.00000 0.00000 0.00000 0.00000 0.00000
 -13   4  10   27.14    2.64   2 0.00000 0.00000 0.00000 0.00000 0.00000 0.00000
  10   3 -12   72.05    6.35  -1 0.00000 0.00000 0.00000 0.00000 0.00000 0.00000
  -3   3  14   72.05    6.35   2 0.00000 0.00000 0.00000 0.00000 0.00000 0.00000
   9   3 -11    5.13    1.27   2 0.00000 0.00000 0.00000 0.00000 0.00000 0.00000
   8   3 -10   93.60    3.17   2 0.00000 0.00000 0.00000 0.00000 0.00000 0.00000
   7   3  -9  149.95    3.59   2 0.00000 0.00000 0.00000 0.00000 0.00000 0.00000
   6   3  -8  237.79    5.41   2 0.00000 0.00000 0.00000 0.00000 0.00000 0.00000
   5   3  -7    2.53    1.42   2 0.00000 0.00000 0.00000 0.00000 0.00000 0.00000
   4   3  -6   58.60    1.91  -1 0.00000 0.00000 0.00000 0.00000 0.00000 0.00000
  -2   3   6   58.60    1.91   2 0.00000 0.00000 0.00000 0.00000 0.00000 0.00000
   3   3  -5   27.04    1.27  -1 0.00000 0.00000 0.00000 0.00000 0.00000 0.00000
  -2   3   5   27.04    1.27   2 0.00000 0.00000 0.00000 0.00000 0.00000 0.00000
   2   3  -4 1571.56    9.84  -1 0.00000 0.00000 0.00000 0.00000 0.00000 0.00000
  -2   3   4 1571.56    9.84   2 0.00000 0.00000 0.00000 0.00000 0.00000 0.00000
   1   3  -3  177.56    1.90   2 0.00000 0.00000 0.00000 0.00000 0.00000 0.00000
   0   3  -2  324.83    2.34   2 0.00000 0.00000 0.00000 0.00000 0.00000 0.00000
  -1   3  -1  903.32    6.25   2 0.00000 0.00000 0.00000 0.00000 0.00000 0.00000
  -2   3   0   12.16    1.03   2 0.00000 0.00000 0.00000 0.00000 0.00000 0.00000
  -3   3   1   38.78    1.29   2 0.00000 0.00000 0.00000 0.00000 0.00000 0.00000
  -4   3   2    3.69    0.70   2 0.00000 0.00000 0.00000 0.00000 0.00000 0.00000
  -5   3   3  560.65    4.83  -1 0.00000 0.00000 0.00000 0.00000 0.00000 0.00000
   1  -3   5  560.65    4.83   2 0.00000 0.00000 0.00000 0.00000 0.00000 0.00000
  -6   3   4 1930.51   13.90  -1 0.00000 0.00000 0.00000 0.00000 0.00000 0.00000
   1  -3   6 1930.51   13.90   2 0.00000 0.00000 0.00000 0.00000 0.00000 0.00000
  -7   3   5  102.39    2.52   2 0.00000 0.00000 0.00000 0.00000 0.00000 0.00000
  -8   3   6  121.71    2.97   2 0.00000 0.00000 0.00000 0.00000 0.00000 0.00000
  -9   3   7  152.64    3.52   2 0.00000 0.00000 0.00000 0.00000 0.00000 0.00000
 -10   3   8   77.67    2.60   2 0.00000 0.00000 0.00000 0.00000 0.00000 0.00000
 -11   3   9   13.55    1.60   2 0.00000 0.00000 0.00000 0.00000 0.00000 0.00000
 -12   3  10   35.81    3.71  -1 0.00000 0.00000 0.00000 0.00000 0.00000 0.00000
   0  -3  14   35.81    3.71   2 0.00000 0.00000 0.00000 0.00000 0.00000 0.00000
 -13   3  11  145.41    4.79  -1 0.00000 0.00000 0.00000 0.00000 0.00000 0.00000
   0  -3  15  145.41    4.79   2 0.00000 0.00000 0.00000 0.00000 0.00000 0.00000
  11   2 -12   58.36    2.60   2 0.00000 0.00000 0.00000 0.00000 0.00000 0.00000
  10   2 -11   22.25    4.79  -1 0.00000 0.00000 0.00000 0.00000 0.00000 0.00000
  -2   2  13   22.25    4.79   2 0.00000 0.00000 0.00000 0.00000 0.00000 0.00000
   9   2 -10    7.90    4.48  -1 0.00000 0.00000 0.00000 0.00000 0.00000 0.00000
  -2   2  12    7.90    4.48   2 0.00000 0.00000 0.00000 0.00000 0.00000 0.00000
   8   2  -9  247.16    4.49   2 0.00000 0.00000 0.00000 0.00000 0.00000 0.00000
   8   2  -9  542.66   12.59  -1 0.00000 0.00000 0.00000 0.00000 0.00000 0.00000
  -2   2  11  542.66   12.59   2 0.00000 0.00000 0.00000 0.00000 0.00000 0.00000
   7   2  -8  294.11    4.64   2 0.00000 0.00000 0.00000 0.00000 0.00000 0.00000
   6   2  -7    6.45    1.58   2 0.00000 0.00000 0.00000 0.00000 0.00000 0.00000
   5   2  -6    3.29    1.30   2 0.00000 0.00000 0.00000 0.00000 0.00000 0.00000
   4   2  -5  190.00    3.96   2 0.00000 0.00000 0.00000 0.00000 0.00000 0.00000
   3   2  -4  500.60    8.97  -1 0.00000 0.00000 0.00000 0.00000 0.00000 0.00000
  -1   2   4  500.60    8.97   2 0.00000 0.00000 0.00000 0.00000 0.00000 0.00000
   2   2  -3  847.50    6.54  -1 0.00000 0.00000 0.00000 0.00000 0.00000 0.00000
  -1   2   3  847.50    6.54   2 0.00000 0.00000 0.00000 0.00000 0.00000 0.00000
   1   2  -2  134.40    2.14  -1 0.00000 0.00000 0.00000 0.00000 0.00000 0.00000
  -1   2   2  134.40    2.14   2 0.00000 0.00000 0.00000 0.00000 0.00000 0.00000
   1   2  -2   46.52    1.22   2 0.00000 0.00000 0.00000 0.00000 0.00000 0.00000
   0   2  -1  210.97    1.72   2 0.00000 0.00000 0.00000 0.00000 0.00000 0.00000
  -1   2   0  528.09    4.48   2 0.00000 0.00000 0.00000 0.00000 0.00000 0.00000
  -2   2   1    0.68    0.53   2 0.00000 0.00000 0.00000 0.00000 0.00000 0.00000
  -3   2   2  880.05    7.59   2 0.00000 0.00000 0.00000 0.00000 0.00000 0.00000
  -4   2   3  218.62    2.34   2 0.00000 0.00000 0.00000 0.00000 0.00000 0.00000
  -5   2   4  177.07    3.27  -1 0.00000 0.00000 0.00000 0.00000 0.00000 0.00000
   0  -2   6  177.07    3.27   2 0.00000 0.00000 0.00000 0.00000 0.00000 0.00000
  -6   2   5  599.68    4.50  -1 0.00000 0.00000 0.00000 0.00000 0.00000 0.00000
   0  -2   7  599.68    4.50   2 0.00000 0.00000 0.00000 0.00000 0.00000 0.00000
  -7   2   6  180.88    3.81  -1 0.00000 0.00000 0.00000 0.00000 0.00000 0.00000
   0  -2   8  180.88    3.81   2 0.00000 0.00000 0.00000 0.00000 0.00000 0.00000
  -8   2   7  282.30    4.46   2 0.00000 0.00000 0.00000 0.00000 0.00000 0.00000
  -9   2   8  235.15    4.28   2 0.00000 0.00000 0.00000 0.00000 0.00000 0.00000
 -10   2   9   93.46    2.74   2 0.00000 0.00000 0.00000 0.00000 0.00000 0.00000
 -11   2  10   10.66    1.63   2 0.00000 0.00000 0.00000 0.00000 0.00000 0.00000
 -12   2  11   35.05    3.10   2 0.00000 0.00000 0.00000 0.00000 0.00000 0.00000
  11   1 -11   38.27    2.87   2 0.00000 0.00000 0.00000 0.00000 0.00000 0.00000
  10   1 -10   28.62    2.57   2 0.00000 0.00000 0.00000 0.00000 0.00000 0.00000
   9   1  -9   17.60    2.94  -1 0.00000 0.00000 0.00000 0.00000 0.00000 0.00000
  -1   1  11   17.60    2.94   2 0.00000 0.00000 0.00000 0.00000 0.00000 0.00000
   8   1  -8  806.59    9.06  -1 0.00000 0.00000 0.00000 0.00000 0.00000 0.00000
  -1   1  10  806.59    9.06   2 0.00000 0.00000 0.00000 0.00000 0.00000 0.00000
   7   1  -7  199.03    3.65  -1 0.00000 0.00000 0.00000 0.00000 0.00000 0.00000
  -1   1   9  199.03    3.65   2 0.00000 0.00000 0.00000 0.00000 0.00000 0.00000
   6   1  -6   27.33    1.82   2 0.00000 0.00000 0.00000 0.00000 0.00000 0.00000
   5   1  -5  229.83    3.23   2 0.00000 0.00000 0.00000 0.00000 0.00000 0.00000
   4   1  -4  752.23    6.95   2 0.00000 0.00000 0.00000 0.00000 0.00000 0.00000
   3   1  -3   29.30    0.93   2 0.00000 0.00000 0.00000 0.00000 0.00000 0.00000
   2   1  -2    1.94    0.42   2 0.00000 0.00000 0.00000 0.00000 0.00000 0.00000
   1   1  -1 4478.98   60.16  -1 0.00000 0.00000 0.00000 0.00000 0.00000 0.00000
   0   1   1 4478.98   60.16   2 0.00000 0.00000 0.00000 0.00000 0.00000 0.00000
   0   1   0    3.69    0.45   2 0.00000 0.00000 0.00000 0.00000 0.00000 0.00000
  -1   1   1 2293.89   17.94   2 0.00000 0.00000 0.00000 0.00000 0.00000 0.00000
  -2   1   2   66.08    1.51   2 0.00000 0.00000 0.00000 0.00000 0.00000 0.00000
  -3   1   3  892.85    7.76   2 0.00000 0.00000 0.00000 0.00000 0.00000 0.00000
  -4   1   4  413.03    4.39   2 0.00000 0.00000 0.00000 0.00000 0.00000 0.00000
  -5   1   5   17.80    1.63   2 0.00000 0.00000 0.00000 0.00000 0.00000 0.00000
  -6   1   6    1.79    0.98   2 0.00000 0.00000 0.00000 0.00000 0.00000 0.00000
  -7   1   7  514.18    6.54  -1 0.00000 0.00000 0.00000 0.00000 0.00000 0.00000
  -1  -1   9  514.18    6.54   2 0.00000 0.00000 0.00000 0.00000 0.00000 0.00000
  -8   1   8  123.73    3.55  -1 0.00000 0.00000 0.00000 0.00000 0.00000 0.00000
  -1  -1  10  123.73    3.55   2 0.00000 0.00000 0.00000 0.00000 0.00000 0.00000
  -9   1   9  198.27    6.49  -1 0.00000 0.00000 0.00000 0.00000 0.00000 0.00000
  -1  -1  11  198.27    6.49   2 0.00000 0.00000 0.00000 0.00000 0.00000 0.00000
 -10   1  10   83.35    4.46   2 0.00000 0.00000 0.00000 0.00000 0.00000 0.00000
 -11   1  11  182.63    4.56   2 0.00000 0.00000 0.00000 0.00000 0.00000 0.00000
 -12   1  12   13.12    2.22   2 0.00000 0.00000 0.00000 0.00000 0.00000 0.00000
  12   0 -11    6.21    1.92   2 0.00000 0.00000 0.00000 0.00000 0.00000 0.00000
  11   0 -10    5.98    1.75   2 0.00000 0.00000 0.00000 0.00000 0.00000 0.00000
  10   0  -9   78.07    3.09   2 0.00000 0.00000 0.00000 0.00000 0.00000 0.00000
   9   0  -8  188.20    3.25   2 0.00000 0.00000 0.00000 0.00000 0.00000 0.00000
   8   0  -7  534.05    6.95  -1 0.00000 0.00000 0.00000 0.00000 0.00000 0.00000
   0   0   9  534.05    6.95   2 0.00000 0.00000 0.00000 0.00000 0.00000 0.00000
   7   0  -6  462.88    5.79  -1 0.00000 0.00000 0.00000 0.00000 0.00000 0.00000
   0   0   8  462.88    5.79   2 0.00000 0.00000 0.00000 0.00000 0.00000 0.00000
   6   0  -5   45.85    2.51  -1 0.00000 0.00000 0.00000 0.00000 0.00000 0.00000
   0   0   7   45.85    2.51   2 0.00000 0.00000 0.00000 0.00000 0.00000 0.00000
   5   0  -4  162.98    2.18   2 0.00000 0.00000 0.00000 0.00000 0.00000 0.00000
   4   0  -3  243.94    2.48   2 0.00000 0.00000 0.00000 0.00000 0.00000 0.00000
   3   0  -2  248.73    2.02   2 0.00000 0.00000 0.00000 0.00000 0.00000 0.00000
   2   0  -1   16.09    0.70   2 0.00000 0.00000 0.00000 0.00000 0.00000 0.00000
   1   0   0 3832.20   26.93   2 0.00000 0.00000 0.00000 0.00000 0.00000 0.00000
   0   0   1  157.35    2.37  -1 0.00000 0.00000 0.00000 0.00000 0.00000 0.00000
  -1   0   1  157.35    2.37   2 0.00000 0.00000 0.00000 0.00000 0.00000 0.00000
  -1   0   2 2594.99   18.71  -1 0.00000 0.00000 0.00000 0.00000 0.00000 0.00000
  -1   0   2 2594.99   18.71   2 0.00000 0.00000 0.00000 0.00000 0.00000 0.00000
  -2   0   3 5182.13   36.08  -1 0.00000 0.00000 0.00000 0.00000 0.00000 0.00000
  -1   0   3 5182.13   36.08   2 0.00000 0.00000 0.00000 0.00000 0.00000 0.00000
  -3   0   4 1260.26   10.72   2 0.00000 0.00000 0.00000 0.00000 0.00000 0.00000
  -4   0   5  416.06    4.62   2 0.00000 0.00000 0.00000 0.00000 0.00000 0.00000
  -5   0   6  163.66    2.90   2 0.00000 0.00000 0.00000 0.00000 0.00000 0.00000
  -6   0   7   71.21    3.19   2 0.00000 0.00000 0.00000 0.00000 0.00000 0.00000
  -7   0   8  151.14    4.69   2 0.00000 0.00000 0.00000 0.00000 0.00000 0.00000
  -8   0   9  348.34    5.72  -1 0.00000 0.00000 0.00000 0.00000 0.00000 0.00000
  -2   0  11  348.34    5.72   2 0.00000 0.00000 0.00000 0.00000 0.00000 0.00000
  -9   0  10   59.49    3.13  -1 0.00000 0.00000 0.00000 0.00000 0.00000 0.00000
  -2   0  12   59.49    3.13   2 0.00000 0.00000 0.00000 0.00000 0.00000 0.00000
 -10   0  11    8.72    3.47  -1 0.00000 0.00000 0.00000 0.00000 0.00000 0.00000
  -2   0  13    8.72    3.47   2 0.00000 0.00000 0.00000 0.00000 0.00000 0.00000
 -11   0  12  126.15    4.13   2 0.00000 0.00000 0.00000 0.00000 0.00000 0.00000
  12  -1 -10   37.70    5.60  -1 0.00000 0.00000 0.00000 0.00000 0.00000 0.00000
   0  -1  14   37.70    5.60   2 0.00000 0.00000 0.00000 0.00000 0.00000 0.00000
  11  -1  -9    6.42    1.68   2 0.00000 0.00000 0.00000 0.00000 0.00000 0.00000
  10  -1  -8  219.66    4.35   2 0.00000 0.00000 0.00000 0.00000 0.00000 0.00000
   9  -1  -7  176.27    3.05   2 0.00000 0.00000 0.00000 0.00000 0.00000 0.00000
   8  -1  -6    1.50    0.93   2 0.00000 0.00000 0.00000 0.00000 0.00000 0.00000
   7  -1  -5   79.53    1.91   2 0.00000 0.00000 0.00000 0.00000 0.00000 0.00000
   6  -1  -4  967.84    9.61  -1 0.00000 0.00000 0.00000 0.00000 0.00000 0.00000
   1  -1   6  967.84    9.61   2 0.00000 0.00000 0.00000 0.00000 0.00000 0.00000
   5  -1  -3  576.62    4.77  -1 0.00000 0.00000 0.00000 0.00000 0.00000 0.00000
   1  -1   5  576.62    4.77   2 0.00000 0.00000 0.00000 0.00000 0.00000 0.00000
   4  -1  -2  470.75    3.34   2 0.00000 0.00000 0.00000 0.00000 0.00000 0.00000
   3  -1  -1  270.60    2.08   2 0.00000 0.00000 0.00000 0.00000 0.00000 0.00000
   2  -1   0   62.14    0.84   2 0.00000 0.00000 0.00000 0.00000 0.00000 0.00000
   1  -1   1  918.04    7.46   2 0.00000 0.00000 0.00000 0.00000 0.00000 0.00000
   0  -1   2   34.73    0.92   2 0.00000 0.00000 0.00000 0.00000 0.00000 0.00000
  -1  -1   3  851.67    7.53   2 0.00000 0.00000 0.00000 0.00000 0.00000 0.00000
  -2  -1   4 9864.26   67.91  -1 0.00000 0.00000 0.00000 0.00000 0.00000 0.00000
  -2   1   4 9864.26   67.91   2 0.00000 0.00000 0.00000 0.00000 0.00000 0.00000
  -3  -1   5   65.09    1.58  -1 0.00000 0.00000 0.00000 0.00000 0.00000 0.00000
  -2   1   5   65.09    1.58   2 0.00000 0.00000 0.00000 0.00000 0.00000 0.00000
  -4  -1   6  135.64    3.72   2 0.00000 0.00000 0.00000 0.00000 0.00000 0.00000
  -5  -1   7  356.80    6.41   2 0.00000 0.00000 0.00000 0.00000 0.00000 0.00000
  -6  -1   8  139.36    4.31   2 0.00000 0.00000 0.00000 0.00000 0.00000 0.00000
  -7  -1   9  247.70    5.94   2 0.00000 0.00000 0.00000 0.00000 0.00000 0.00000
  -8  -1  10  175.70    5.42   2 0.00000 0.00000 0.00000 0.00000 0.00000 0.00000
  -9  -1  11  302.97    6.00  -1 0.00000 0.00000 0.00000 0.00000 0.00000 0.00000
  -3   1  13  302.97    6.00   2 0.00000 0.00000 0.00000 0.00000 0.00000 0.00000
 -10  -1  12    1.85    4.14  -1 0.00000 0.00000 0.00000 0.00000 0.00000 0.00000
  -3   1  14    1.85    4.14   2 0.00000 0.00000 0.00000 0.00000 0.00000 0.00000
 -11  -1  13  178.51    8.22  -1 0.00000 0.00000 0.00000 0.00000 0.00000 0.00000
  -3   1  15  178.51    8.22   2 0.00000 0.00000 0.00000 0.00000 0.00000 0.00000
  13  -2 -10   29.88    3.83  -1 0.00000 0.00000 0.00000 0.00000 0.00000 0.00000
   1  -2  14   29.88    3.83   2 0.00000 0.00000 0.00000 0.00000 0.00000 0.00000
  12  -2  -9  112.56    3.91  -1 0.00000 0.00000 0.00000 0.00000 0.00000 0.00000
   1  -2  13  112.56    3.91   2 0.00000 0.00000 0.00000 0.00000 0.00000 0.00000
  11  -2  -8  243.03    5.48  -1 0.00000 0.00000 0.00000 0.00000 0.00000 0.00000
   1  -2  12  243.03    5.48   2 0.00000 0.00000 0.00000 0.00000 0.00000 0.00000
  10  -2  -7  105.73    2.62   2 0.00000 0.00000 0.00000 0.00000 0.00000 0.00000
   9  -2  -6    7.61    1.15   2 0.00000 0.00000 0.00000 0.00000 0.00000 0.00000
   8  -2  -5    3.42    0.94   2 0.00000 0.00000 0.00000 0.00000 0.00000 0.00000
   7  -2  -4   72.39    1.58   2 0.00000 0.00000 0.00000 0.00000 0.00000 0.00000
   6  -2  -3 1472.31    9.21   2 0.00000 0.00000 0.00000 0.00000 0.00000 0.00000
   5  -2  -2   67.80    2.09  -1 0.00000 0.00000 0.00000 0.00000 0.00000 0.00000
   2  -2   4   67.80    2.09   2 0.00000 0.00000 0.00000 0.00000 0.00000 0.00000
   4  -2  -1   58.48    1.56  -1 0.00000 0.00000 0.00000 0.00000 0.00000 0.00000
   2  -2   3   58.48    1.56   2 0.00000 0.00000 0.00000 0.00000 0.00000 0.00000
   3  -2   0  863.94    6.19   2 0.00000 0.00000 0.00000 0.00000 0.00000 0.00000
   2  -2   1  228.45    2.07   2 0.00000 0.00000 0.00000 0.00000 0.00000 0.00000
   1  -2   2  673.30    4.24   2 0.00000 0.00000 0.00000 0.00000 0.00000 0.00000
   0  -2   3   18.93    1.05   2 0.00000 0.00000 0.00000 0.00000 0.00000 0.00000
  -1  -2   4  154.04    2.33   2 0.00000 0.00000 0.00000 0.00000 0.00000 0.00000
  -2  -2   5 1001.68    9.22   2 0.00000 0.00000 0.00000 0.00000 0.00000 0.00000
  -3  -2   6  336.30    3.70  -1 0.00000 0.00000 0.00000 0.00000 0.00000 0.00000
  -3   2   6  336.30    3.70   2 0.00000 0.00000 0.00000 0.00000 0.00000 0.00000
  -4  -2   7  112.76    1.91  -1 0.00000 0.00000 0.00000 0.00000 0.00000 0.00000
  -3   2   7  112.76    1.91   2 0.00000 0.00000 0.00000 0.00000 0.00000 0.00000
  -5  -2   8  651.98    7.51  -1 0.00000 0.00000 0.00000 0.00000 0.00000 0.00000
  -3   2   8  651.98    7.51   2 0.00000 0.00000 0.00000 0.00000 0.00000 0.00000
  -6  -2   9   10.74    1.65   2 0.00000 0.00000 0.00000 0.00000 0.00000 0.00000
  -7  -2  10  232.50    4.50   2 0.00000 0.00000 0.00000 0.00000 0.00000 0.00000
  -8  -2  11   17.84    2.08   2 0.00000 0.00000 0.00000 0.00000 0.00000 0.00000
  -9  -2  12  113.78    3.82   2 0.00000 0.00000 0.00000 0.00000 0.00000 0.00000
  13  -3  -9    3.85    1.84   2 0.00000 0.00000 0.00000 0.00000 0.00000 0.00000
  12  -3  -8   50.34    5.38  -1 0.00000 0.00000 0.00000 0.00000 0.00000 0.00000
   2  -3  12   50.34    5.38   2 0.00000 0.00000 0.00000 0.00000 0.00000 0.00000
  11  -3  -7  383.11    6.29  -1 0.00000 0.00000 0.00000 0.00000 0.00000 0.00000
   2  -3  11  383.11    6.29   2 0.00000 0.00000 0.00000 0.00000 0.00000 0.00000
  10  -3  -6  171.04    4.43  -1 0.00000 0.00000 0.00000 0.00000 0.00000 0.00000
   2  -3  10  171.04    4.43   2 0.00000 0.00000 0.00000 0.00000 0.00000 0.00000
   9  -3  -5    9.83    1.17   2 0.00000 0.00000 0.00000 0.00000 0.00000 0.00000
   8  -3  -4  218.06    2.60   2 0.00000 0.00000 0.00000 0.00000 0.00000 0.00000
   7  -3  -3  160.98    2.08   2 0.00000 0.00000 0.00000 0.00000 0.00000 0.00000
   6  -3  -2  223.46    2.29   2 0.00000 0.00000 0.00000 0.00000 0.00000 0.00000
   5  -3  -1  135.41    1.92   2 0.00000 0.00000 0.00000 0.00000 0.00000 0.00000
   4  -3   0  183.83    2.07   2 0.00000 0.00000 0.00000 0.00000 0.00000 0.00000
   3  -3   1 6957.14   44.60  -1 0.00000 0.00000 0.00000 0.00000 0.00000 0.00000
   3  -3   1 6957.14   44.60   2 0.00000 0.00000 0.00000 0.00000 0.00000 0.00000
   2  -3   2  343.71    2.95   2 0.00000 0.00000 0.00000 0.00000 0.00000 0.00000
   1  -3   3    6.67    0.54   2 0.00000 0.00000 0.00000 0.00000 0.00000 0.00000
   0  -3   4  219.63    2.06   2 0.00000 0.00000 0.00000 0.00000 0.00000 0.00000
  -1  -3   5   16.98    1.17   2 0.00000 0.00000 0.00000 0.00000 0.00000 0.00000
  -2  -3   6  237.88    3.40   2 0.00000 0.00000 0.00000 0.00000 0.00000 0.00000
  -3  -3   7   57.91    2.09   2 0.00000 0.00000 0.00000 0.00000 0.00000 0.00000
  -4  -3   8  370.15    4.29  -1 0.00000 0.00000 0.00000 0.00000 0.00000 0.00000
  -4   3   8  370.15    4.29   2 0.00000 0.00000 0.00000 0.00000 0.00000 0.00000
  -5  -3   9  736.15    6.85  -1 0.00000 0.00000 0.00000 0.00000 0.00000 0.00000
  -4   3   9  736.15    6.85   2 0.00000 0.00000 0.00000 0.00000 0.00000 0.00000
  -6  -3  10   35.55    2.56  -1 0.00000 0.00000 0.00000 0.00000 0.00000 0.00000
  -4   3  10   35.55    2.56   2 0.00000 0.00000 0.00000 0.00000 0.00000 0.00000
  -7  -3  11    4.24    1.70   2 0.00000 0.00000 0.00000 0.00000 0.00000 0.00000
  -8  -3  12    2.96    1.87   2 0.00000 0.00000 0.00000 0.00000 0.00000 0.00000
  -9  -3  13   87.88    3.73   2 0.00000 0.00000 0.00000 0.00000 0.00000 0.00000
  13  -4  -8   16.40    2.06   2 0.00000 0.00000 0.00000 0.00000 0.00000 0.00000
  12  -4  -7   77.72    3.16   2 0.00000 0.00000 0.00000 0.00000 0.00000 0.00000
  11  -4  -6  120.65    3.48   2 0.00000 0.00000 0.00000 0.00000 0.00000 0.00000
  10  -4  -5   49.94    4.40  -1 0.00000 0.00000 0.00000 0.00000 0.00000 0.00000
   3  -4   9   49.94    4.40   2 0.00000 0.00000 0.00000 0.00000 0.00000 0.00000
   9  -4  -4   77.45    4.26  -1 0.00000 0.00000 0.00000 0.00000 0.00000 0.00000
   3  -4   8   77.45    4.26   2 0.00000 0.00000 0.00000 0.00000 0.00000 0.00000
   8  -4  -3  995.03   14.73  -1 0.00000 0.00000 0.00000 0.00000 0.00000 0.00000
   3  -4   7  995.03   14.73   2 0.00000 0.00000 0.00000 0.00000 0.00000 0.00000
   7  -4  -2  147.70    2.00   2 0.00000 0.00000 0.00000 0.00000 0.00000 0.00000
   6  -4  -1   18.15    1.23   2 0.00000 0.00000 0.00000 0.00000 0.00000 0.00000
   5  -4   0  423.76    3.81   2 0.00000 0.00000 0.00000 0.00000 0.00000 0.00000
   4  -4   1    6.07    0.54   2 0.00000 0.00000 0.00000 0.00000 0.00000 0.00000
   3  -4   2  536.18    4.37   2 0.00000 0.00000 0.00000 0.00000 0.00000 0.00000
   2  -4   3   29.64    1.36  -1 0.00000 0.00000 0.00000 0.00000 0.00000 0.00000
  -4   4   1   29.64    1.36   2 0.00000 0.00000 0.00000 0.00000 0.00000 0.00000
   1  -4   4  100.24    2.19  -1 0.00000 0.00000 0.00000 0.00000 0.00000 0.00000
  -4   4   2  100.24    2.19   2 0.00000 0.00000 0.00000 0.00000 0.00000 0.00000
   0  -4   5 1016.66    6.63   2 0.00000 0.00000 0.00000 0.00000 0.00000 0.00000
  -1  -4   6  177.44    2.10   2 0.00000 0.00000 0.00000 0.00000 0.00000 0.00000
  -2  -4   7   18.48    1.18   2 0.00000 0.00000 0.00000 0.00000 0.00000 0.00000
  -3  -4   8   11.60    1.34   2 0.00000 0.00000 0.00000 0.00000 0.00000 0.00000
  -4  -4   9  192.58    3.74   2 0.00000 0.00000 0.00000 0.00000 0.00000 0.00000
  -5  -4  10  239.35    7.72  -1 0.00000 0.00000 0.00000 0.00000 0.00000 0.00000
  -5   4  10  239.35    7.72   2 0.00000 0.00000 0.00000 0.00000 0.00000 0.00000
  -6  -4  11   18.21    4.51  -1 0.00000 0.00000 0.00000 0.00000 0.00000 0.00000
  -5   4  11   18.21    4.51   2 0.00000 0.00000 0.00000 0.00000 0.00000 0.00000
  -7  -4  12   70.20    5.57  -1 0.00000 0.00000 0.00000 0.00000 0.00000 0.00000
  -5   4  12   70.20    5.57   2 0.00000 0.00000 0.00000 0.00000 0.00000 0.00000
  -8  -4  13   38.99    2.51   2 0.00000 0.00000 0.00000 0.00000 0.00000 0.00000
  -9  -4  14   39.87    2.67   2 0.00000 0.00000 0.00000 0.00000 0.00000 0.00000
  14  -5  -8   56.20    4.95   2 0.00000 0.00000 0.00000 0.00000 0.00000 0.00000
  13  -5  -7  128.83    3.85   2 0.00000 0.00000 0.00000 0.00000 0.00000 0.00000
  12  -5  -6   69.36    3.11   2 0.00000 0.00000 0.00000 0.00000 0.00000 0.00000
  11  -5  -5   47.87    2.20   2 0.00000 0.00000 0.00000 0.00000 0.00000 0.00000
  10  -5  -4  127.98    2.34   2 0.00000 0.00000 0.00000 0.00000 0.00000 0.00000
   9  -5  -3  219.16    6.54  -1 0.00000 0.00000 0.00000 0.00000 0.00000 0.00000
   4  -5   7  219.16    6.54   2 0.00000 0.00000 0.00000 0.00000 0.00000 0.00000
   8  -5  -2 1211.39   11.50  -1 0.00000 0.00000 0.00000 0.00000 0.00000 0.00000
   4  -5   6 1211.39   11.50   2 0.00000 0.00000 0.00000 0.00000 0.00000 0.00000
   7  -5  -1  532.20    6.25  -1 0.00000 0.00000 0.00000 0.00000 0.00000 0.00000
   4  -5   5  532.20    6.25   2 0.00000 0.00000 0.00000 0.00000 0.00000 0.00000
   7  -5  -1  132.45    2.75   2 0.00000 0.00000 0.00000 0.00000 0.00000 0.00000
   6  -5   0    3.49    0.69   2 0.00000 0.00000 0.00000 0.00000 0.00000 0.00000
   5  -5   1 1523.40    9.42   2 0.00000 0.00000 0.00000 0.00000 0.00000 0.00000
   4  -5   2   37.25    1.32   2 0.00000 0.00000 0.00000 0.00000 0.00000 0.00000
   3  -5   3   44.09    1.37   2 0.00000 0.00000 0.00000 0.00000 0.00000 0.00000
   2  -5   4  310.70    3.19   2 0.00000 0.00000 0.00000 0.00000 0.00000 0.00000
   0  -5   6 1611.88   19.80  -1 0.00000 0.00000 0.00000 0.00000 0.00000 0.00000
  -5   5   4 1611.88   19.80   2 0.00000 0.00000 0.00000 0.00000 0.00000 0.00000
  -2  -5   8   88.82    1.81   2 0.00000 0.00000 0.00000 0.00000 0.00000 0.00000
  -3  -5   9  189.88    2.67   2 0.00000 0.00000 0.00000 0.00000 0.00000 0.00000
  -4  -5  10  271.05    3.31   2 0.00000 0.00000 0.00000 0.00000 0.00000 0.00000
  -5  -5  11   33.34    2.05   2 0.00000 0.00000 0.00000 0.00000 0.00000 0.00000
  -6  -5  12   32.82    2.20   2 0.00000 0.00000 0.00000 0.00000 0.00000 0.00000
  -7  -5  13  534.78   12.19  -1 0.00000 0.00000 0.00000 0.00000 0.00000 0.00000
  -6   5  13  534.78   12.19   2 0.00000 0.00000 0.00000 0.00000 0.00000 0.00000
  -8  -5  14    8.42    4.98  -1 0.00000 0.00000 0.00000 0.00000 0.00000 0.00000
  -6   5  14    8.42    4.98   2 0.00000 0.00000 0.00000 0.00000 0.00000 0.00000
  14  -6  -7   84.99    5.98  -1 0.00000 0.00000 0.00000 0.00000 0.00000 0.00000
   4  -6  13   84.99    5.98   2 0.00000 0.00000 0.00000 0.00000 0.00000 0.00000
  12  -6  -5   38.58    2.26   2 0.00000 0.00000 0.00000 0.00000 0.00000 0.00000
  11  -6  -4  134.23    2.90   2 0.00000 0.00000 0.00000 0.00000 0.00000 0.00000
  10  -6  -3  366.90    3.82   2 0.00000 0.00000 0.00000 0.00000 0.00000 0.00000
   9  -6  -2   71.22    1.83   2 0.00000 0.00000 0.00000 0.00000 0.00000 0.00000
   8  -6  -1  383.52    4.17   2 0.00000 0.00000 0.00000 0.00000 0.00000 0.00000
   7  -6   0  233.96    3.88  -1 0.00000 0.00000 0.00000 0.00000 0.00000 0.00000
   5  -6   4  233.96    3.88   2 0.00000 0.00000 0.00000 0.00000 0.00000 0.00000
   6  -6   1    9.27    1.73  -1 0.00000 0.00000 0.00000 0.00000 0.00000 0.00000
   5  -6   3    9.27    1.73   2 0.00000 0.00000 0.00000 0.00000 0.00000 0.00000
   5  -6   2 1141.68    8.67   2 0.00000 0.00000 0.00000 0.00000 0.00000 0.00000
   4  -6   3   53.97    1.58   2 0.00000 0.00000 0.00000 0.00000 0.00000 0.00000
   3  -6   4   51.00    1.58   2 0.00000 0.00000 0.00000 0.00000 0.00000 0.00000
   2  -6   5  237.84    2.91   2 0.00000 0.00000 0.00000 0.00000 0.00000 0.00000
   1  -6   6  176.88    2.19   2 0.00000 0.00000 0.00000 0.00000 0.00000 0.00000
  -1  -6   8  196.13    5.08  -1 0.00000 0.00000 0.00000 0.00000 0.00000 0.00000
  -6   6   6  196.13    5.08   2 0.00000 0.00000 0.00000 0.00000 0.00000 0.00000
  -2  -6   9  310.98    5.17  -1 0.00000 0.00000 0.00000 0.00000 0.00000 0.00000
  -6   6   7  310.98    5.17   2 0.00000 0.00000 0.00000 0.00000 0.00000 0.00000
  -3  -6  10  148.98    2.54   2 0.00000 0.00000 0.00000 0.00000 0.00000 0.00000
  -4  -6  11  117.42    2.45   2 0.00000 0.00000 0.00000 0.00000 0.00000 0.00000
  -5  -6  12   25.51    1.61   2 0.00000 0.00000 0.00000 0.00000 0.00000 0.00000
  -6  -6  13   44.05    2.49   2 0.00000 0.00000 0.00000 0.00000 0.00000 0.00000
  -7  -6  14  202.95    4.08   2 0.00000 0.00000 0.00000 0.00000 0.00000 0.00000
  14  -7  -6  214.04    8.04  -1 0.00000 0.00000 0.00000 0.00000 0.00000 0.00000
   5  -7  12  214.04    8.04   2 0.00000 0.00000 0.00000 0.00000 0.00000 0.00000
  13  -7  -5  230.08    7.59  -1 0.00000 0.00000 0.00000 0.00000 0.00000 0.00000
   5  -7  11  230.08    7.59   2 0.00000 0.00000 0.00000 0.00000 0.00000 0.00000
  12  -7  -4   30.69    5.32  -1 0.00000 0.00000 0.00000 0.00000 0.00000 0.00000
   5  -7  10   30.69    5.32   2 0.00000 0.00000 0.00000 0.00000 0.00000 0.00000
  11  -7  -3   72.06    2.35   2 0.00000 0.00000 0.00000 0.00000 0.00000 0.00000
  10  -7  -2   45.48    1.75   2 0.00000 0.00000 0.00000 0.00000 0.00000 0.00000
   9  -7  -1  148.14    2.72   2 0.00000 0.00000 0.00000 0.00000 0.00000 0.00000
   8  -7   0  337.54    3.88   2 0.00000 0.00000 0.00000 0.00000 0.00000 0.00000
   7  -7   1 1058.00   10.49   2 0.00000 0.00000 0.00000 0.00000 0.00000 0.00000
   6  -7   2   33.64    2.01  -1 0.00000 0.00000 0.00000 0.00000 0.00000 0.00000
   6  -7   2   33.64    2.01   2 0.00000 0.00000 0.00000 0.00000 0.00000 0.00000
   5  -7   3  669.87    7.24  -1 0.00000 0.00000 0.00000 0.00000 0.00000 0.00000
   6  -7   1  669.87    7.24   2 0.00000 0.00000 0.00000 0.00000 0.00000 0.00000
   4  -7   4  109.18    2.14   2 0.00000 0.00000 0.00000 0.00000 0.00000 0.00000
   3  -7   5    0.03    0.79   2 0.00000 0.00000 0.00000 0.00000 0.00000 0.00000
   2  -7   6  756.48    6.53   2 0.00000 0.00000 0.00000 0.00000 0.00000 0.00000
   1  -7   7    4.98    0.84   2 0.00000 0.00000 0.00000 0.00000 0.00000 0.00000
   0  -7   8    0.42    0.85   2 0.00000 0.00000 0.00000 0.00000 0.00000 0.00000
  -1  -7   9  261.95    3.13   2 0.00000 0.00000 0.00000 0.00000 0.00000 0.00000
  -2  -7  10  622.17    7.80  -1 0.00000 0.00000 0.00000 0.00000 0.00000 0.00000
  -7   7   8  622.17    7.80   2 0.00000 0.00000 0.00000 0.00000 0.00000 0.00000
  -3  -7  11   17.72    2.50  -1 0.00000 0.00000 0.00000 0.00000 0.00000 0.00000
  -7   7   9   17.72    2.50   2 0.00000 0.00000 0.00000 0.00000 0.00000 0.00000
  -4  -7  12   10.89    1.49   2 0.00000 0.00000 0.00000 0.00000 0.00000 0.00000
  -5  -7  13   30.95    2.32   2 0.00000 0.00000 0.00000 0.00000 0.00000 0.00000
  -6  -7  14   30.73    2.49   2 0.00000 0.00000 0.00000 0.00000 0.00000 0.00000
  13  -8  -4   75.03    6.22  -1 0.00000 0.00000 0.00000 0.00000 0.00000 0.00000
   6  -8  10   75.03    6.22   2 0.00000 0.00000 0.00000 0.00000 0.00000 0.00000
  12  -8  -3  222.69    7.06  -1 0.00000 0.00000 0.00000 0.00000 0.00000 0.00000
   6  -8   9  222.69    7.06   2 0.00000 0.00000 0.00000 0.00000 0.00000 0.00000
  11  -8  -2   63.58    5.29  -1 0.00000 0.00000 0.00000 0.00000 0.00000 0.00000
   6  -8   8   63.58    5.29   2 0.00000 0.00000 0.00000 0.00000 0.00000 0.00000
  10  -8  -1   61.76    2.83   2 0.00000 0.00000 0.00000 0.00000 0.00000 0.00000
   9  -8   0   14.11    1.61   2 0.00000 0.00000 0.00000 0.00000 0.00000 0.00000
   8  -8   1   22.17    2.15   2 0.00000 0.00000 0.00000 0.00000 0.00000 0.00000
   7  -8   2   65.42    2.55   2 0.00000 0.00000 0.00000 0.00000 0.00000 0.00000
   6  -8   3    1.44    1.18   2 0.00000 0.00000 0.00000 0.00000 0.00000 0.00000
   5  -8   4  309.69    4.82  -1 0.00000 0.00000 0.00000 0.00000 0.00000 0.00000
  -7   8   0  309.69    4.82   2 0.00000 0.00000 0.00000 0.00000 0.00000 0.00000
   4  -8   5  200.56    3.50  -1 0.00000 0.00000 0.00000 0.00000 0.00000 0.00000
  -7   8   1  200.56    3.50   2 0.00000 0.00000 0.00000 0.00000 0.00000 0.00000
   3  -8   6  121.28    3.05  -1 0.00000 0.00000 0.00000 0.00000 0.00000 0.00000
  -7   8   2  121.28    3.05   2 0.00000 0.00000 0.00000 0.00000 0.00000 0.00000
   2  -8   7  308.52    3.88   2 0.00000 0.00000 0.00000 0.00000 0.00000 0.00000
   1  -8   8   -0.48    0.85   2 0.00000 0.00000 0.00000 0.00000 0.00000 0.00000
   0  -8   9   32.10    1.65   2 0.00000 0.00000 0.00000 0.00000 0.00000 0.00000
  -1  -8  10  296.83    4.13   2 0.00000 0.00000 0.00000 0.00000 0.00000 0.00000
  -2  -8  11   50.98    2.31   2 0.00000 0.00000 0.00000 0.00000 0.00000 0.00000
  -3  -8  12   11.73    5.40  -1 0.00000 0.00000 0.00000 0.00000 0.00000 0.00000
  -8   8  10   11.73    5.40   2 0.00000 0.00000 0.00000 0.00000 0.00000 0.00000
  -4  -8  13   35.95    5.11  -1 0.00000 0.00000 0.00000 0.00000 0.00000 0.00000
  -8   8  11   35.95    5.11   2 0.00000 0.00000 0.00000 0.00000 0.00000 0.00000
  -5  -8  14  141.71    7.87  -1 0.00000 0.00000 0.00000 0.00000 0.00000 0.00000
  -8   8  12  141.71    7.87   2 0.00000 0.00000 0.00000 0.00000 0.00000 0.00000
  13  -9  -3   73.03    3.33   2 0.00000 0.00000 0.00000 0.00000 0.00000 0.00000
  12  -9  -2  476.49   11.31  -1 0.00000 0.00000 0.00000 0.00000 0.00000 0.00000
   7  -9   8  476.49   11.31   2 0.00000 0.00000 0.00000 0.00000 0.00000 0.00000
  11  -9  -1  118.65    5.82  -1 0.00000 0.00000 0.00000 0.00000 0.00000 0.00000
   7  -9   7  118.65    5.82   2 0.00000 0.00000 0.00000 0.00000 0.00000 0.00000
  10  -9   0  265.94    7.64  -1 0.00000 0.00000 0.00000 0.00000 0.00000 0.00000
   7  -9   6  265.94    7.64   2 0.00000 0.00000 0.00000 0.00000 0.00000 0.00000
   9  -9   1  155.54    6.17  -1 0.00000 0.00000 0.00000 0.00000 0.00000 0.00000
   7  -9   5  155.54    6.17   2 0.00000 0.00000 0.00000 0.00000 0.00000 0.00000
   9  -9   1  138.26    3.57   2 0.00000 0.00000 0.00000 0.00000 0.00000 0.00000
   8  -9   2    1.24    1.33   2 0.00000 0.00000 0.00000 0.00000 0.00000 0.00000
   7  -9   3   31.55    2.37   2 0.00000 0.00000 0.00000 0.00000 0.00000 0.00000
   6  -9   4    2.64    1.31   2 0.00000 0.00000 0.00000 0.00000 0.00000 0.00000
   5  -9   5    7.71    1.42   2 0.00000 0.00000 0.00000 0.00000 0.00000 0.00000
   3  -9   7  132.32    4.95  -1 0.00000 0.00000 0.00000 0.00000 0.00000 0.00000
  -8   9   3  132.32    4.95   2 0.00000 0.00000 0.00000 0.00000 0.00000 0.00000
   2  -9   8   23.10    3.67  -1 0.00000 0.00000 0.00000 0.00000 0.00000 0.00000
  -8   9   4   23.10    3.67   2 0.00000 0.00000 0.00000 0.00000 0.00000 0.00000
   1  -9   9   35.70    2.05   2 0.00000 0.00000 0.00000 0.00000 0.00000 0.00000
   0  -9  10   24.74    1.99   2 0.00000 0.00000 0.00000 0.00000 0.00000 0.00000
  -1  -9  11  137.70    3.07   2 0.00000 0.00000 0.00000 0.00000 0.00000 0.00000
  -2  -9  12   39.76    2.33   2 0.00000 0.00000 0.00000 0.00000 0.00000 0.00000
  -3  -9  13   16.44    1.77   2 0.00000 0.00000 0.00000 0.00000 0.00000 0.00000
  -4  -9  14   53.92    2.74   2 0.00000 0.00000 0.00000 0.00000 0.00000 0.00000
  13 -10  -2   71.81    3.39   2 0.00000 0.00000 0.00000 0.00000 0.00000 0.00000
  12 -10  -1   61.85    3.07   2 0.00000 0.00000 0.00000 0.00000 0.00000 0.00000
  11 -10   0    3.74    2.40   2 0.00000 0.00000 0.00000 0.00000 0.00000 0.00000
  10 -10   1   66.33    5.10  -1 0.00000 0.00000 0.00000 0.00000 0.00000 0.00000
   8 -10   5   66.33    5.10   2 0.00000 0.00000 0.00000 0.00000 0.00000 0.00000
   9 -10   2  334.47    5.64  -1 0.00000 0.00000 0.00000 0.00000 0.00000 0.00000
   8 -10   4  334.47    5.64   2 0.00000 0.00000 0.00000 0.00000 0.00000 0.00000
   8 -10   3   67.63    3.61  -1 0.00000 0.00000 0.00000 0.00000 0.00000 0.00000
   8 -10   3   67.63    3.61   2 0.00000 0.00000 0.00000 0.00000 0.00000 0.00000
   7 -10   4   87.26    3.16   2 0.00000 0.00000 0.00000 0.00000 0.00000 0.00000
   6 -10   5  105.38    3.25   2 0.00000 0.00000 0.00000 0.00000 0.00000 0.00000
   5 -10   6   21.10    2.10   2 0.00000 0.00000 0.00000 0.00000 0.00000 0.00000
   4 -10   7  244.92    4.61   2 0.00000 0.00000 0.00000 0.00000 0.00000 0.00000
   3 -10   8   57.52    2.84   2 0.00000 0.00000 0.00000 0.00000 0.00000 0.00000
   2 -10   9   47.70    4.51  -1 0.00000 0.00000 0.00000 0.00000 0.00000 0.00000
  -9  10   5   47.70    4.51   2 0.00000 0.00000 0.00000 0.00000 0.00000 0.00000
   1 -10  10  119.94    5.21  -1 0.00000 0.00000 0.00000 0.00000 0.00000 0.00000
  -9  10   6  119.94    5.21   2 0.00000 0.00000 0.00000 0.00000 0.00000 0.00000
   0 -10  11   68.46    4.95   2 0.00000 0.00000 0.00000 0.00000 0.00000 0.00000
   0 -10  11  244.79    7.47  -1 0.00000 0.00000 0.00000 0.00000 0.00000 0.00000
  -9  10   7  244.79    7.47   2 0.00000 0.00000 0.00000 0.00000 0.00000 0.00000
  -1 -10  12   -1.34    1.33   2 0.00000 0.00000 0.00000 0.00000 0.00000 0.00000
  -2 -10  13   37.76    2.49   2 0.00000 0.00000 0.00000 0.00000 0.00000 0.00000
  12 -11   0   54.15    4.48   2 0.00000 0.00000 0.00000 0.00000 0.00000 0.00000
  11 -11   1   37.61    4.09   2 0.00000 0.00000 0.00000 0.00000 0.00000 0.00000
  10 -11   2   11.97    1.94   2 0.00000 0.00000 0.00000 0.00000 0.00000 0.00000
   9 -11   3  716.12    9.21  -1 0.00000 0.00000 0.00000 0.00000 0.00000 0.00000
   9 -11   3  716.12    9.21   2 0.00000 0.00000 0.00000 0.00000 0.00000 0.00000
   8 -11   4   28.73    2.63  -1 0.00000 0.00000 0.00000 0.00000 0.00000 0.00000
   9 -11   2   28.73    2.63   2 0.00000 0.00000 0.00000 0.00000 0.00000 0.00000
   7 -11   5  100.58    3.74  -1 0.00000 0.00000 0.00000 0.00000 0.00000 0.00000
  -9  11  -1  100.58    3.74   2 0.00000 0.00000 0.00000 0.00000 0.00000 0.00000
   6 -11   6  326.03    5.53   2 0.00000 0.00000 0.00000 0.00000 0.00000 0.00000
   5 -11   7   14.51    1.91   2 0.00000 0.00000 0.00000 0.00000 0.00000 0.00000
   4 -11   8  108.19    3.47   2 0.00000 0.00000 0.00000 0.00000 0.00000 0.00000
   3 -11   9   69.82    3.15   2 0.00000 0.00000 0.00000 0.00000 0.00000 0.00000
   2 -11  10   48.51    2.97   2 0.00000 0.00000 0.00000 0.00000 0.00000 0.00000
   1 -11  11  182.60    7.11  -1 0.00000 0.00000 0.00000 0.00000 0.00000 0.00000
 -10  11   7  182.60    7.11   2 0.00000 0.00000 0.00000 0.00000 0.00000 0.00000
   0 -11  12  288.56    7.67  -1 0.00000 0.00000 0.00000 0.00000 0.00000 0.00000
 -10  11   8  288.56    7.67   2 0.00000 0.00000 0.00000 0.00000 0.00000 0.00000
  11 -12   2   29.88    4.05   2 0.00000 0.00000 0.00000 0.00000 0.00000 0.00000
  10 -12   3    5.93    1.88   2 0.00000 0.00000 0.00000 0.00000 0.00000 0.00000
   9 -12   4  170.41    4.45   2 0.00000 0.00000 0.00000 0.00000 0.00000 0.00000
   8 -12   5  162.16    7.09  -1 0.00000 0.00000 0.00000 0.00000 0.00000 0.00000
 -10  12  -1  162.16    7.09   2 0.00000 0.00000 0.00000 0.00000 0.00000 0.00000
   6 -12   7  473.53   10.09  -1 0.00000 0.00000 0.00000 0.00000 0.00000 0.00000
 -10  12   1  473.53   10.09   2 0.00000 0.00000 0.00000 0.00000 0.00000 0.00000
   5 -12   8  159.98    6.76  -1 0.00000 0.00000 0.00000 0.00000 0.00000 0.00000
 -10  12   2  159.98    6.76   2 0.00000 0.00000 0.00000 0.00000 0.00000 0.00000
   4 -12   9   -0.76    1.66   2 0.00000 0.00000 0.00000 0.00000 0.00000 0.00000
   3 -12  10  139.15    4.11   2 0.00000 0.00000 0.00000 0.00000 0.00000 0.00000
   2 -12  11   81.87    3.58   2 0.00000 0.00000 0.00000 0.00000 0.00000 0.00000
   9 -13   5   -0.30    1.79   2 0.00000 0.00000 0.00000 0.00000 0.00000 0.00000
   8 -13   6   37.96    3.15   2 0.00000 0.00000 0.00000 0.00000 0.00000 0.00000
   7 -13   7    0.39    1.80   2 0.00000 0.00000 0.00000 0.00000 0.00000 0.00000
   6 -13   8  426.90   10.23  -1 0.00000 0.00000 0.00000 0.00000 0.00000 0.00000
 -11  13   2  426.90   10.23   2 0.00000 0.00000 0.00000 0.00000 0.00000 0.00000
   5 -13   9   61.12    4.81  -1 0.00000 0.00000 0.00000 0.00000 0.00000 0.00000
 -11  13   3   61.12    4.81   2 0.00000 0.00000 0.00000 0.00000 0.00000 0.00000
   4 -13  10   26.70    5.50  -1 0.00000 0.00000 0.00000 0.00000 0.00000 0.00000
 -11  13   4   26.70    5.50   2 0.00000 0.00000 0.00000 0.00000 0.00000 0.00000
  -4  14  -8    3.29    1.83   2 0.00000 0.00000 0.00000 0.00000 0.00000 0.00000
  -5  14  -7  162.32    6.17   2 0.00000 0.00000 0.00000 0.00000 0.00000 0.00000
  -5  14  -7  199.17    7.73  -1 0.00000 0.00000 0.00000 0.00000 0.00000 0.00000
  -9  14   1  199.17    7.73   2 0.00000 0.00000 0.00000 0.00000 0.00000 0.00000
  -6  14  -6    1.19    4.44  -1 0.00000 0.00000 0.00000 0.00000 0.00000 0.00000
  -9  14   0    1.19    4.44   2 0.00000 0.00000 0.00000 0.00000 0.00000 0.00000
  -7  14  -5   53.29    4.82  -1 0.00000 0.00000 0.00000 0.00000 0.00000 0.00000
  -9  14  -1   53.29    4.82   2 0.00000 0.00000 0.00000 0.00000 0.00000 0.00000
  -8  14  -4  149.83    7.00  -1 0.00000 0.00000 0.00000 0.00000 0.00000 0.00000
  -9  14  -2  149.83    7.00   2 0.00000 0.00000 0.00000 0.00000 0.00000 0.00000
  -9  14  -3    4.55    2.63   2 0.00000 0.00000 0.00000 0.00000 0.00000 0.00000
  -1  13 -10  113.97    5.98  -1 0.00000 0.00000 0.00000 0.00000 0.00000 0.00000
  -9  13   6  113.97    5.98   2 0.00000 0.00000 0.00000 0.00000 0.00000 0.00000
  -2  13  -9   58.82    2.63   2 0.00000 0.00000 0.00000 0.00000 0.00000 0.00000
  -2  13  -9  106.36    6.53  -1 0.00000 0.00000 0.00000 0.00000 0.00000 0.00000
  -9  13   5  106.36    6.53   2 0.00000 0.00000 0.00000 0.00000 0.00000 0.00000
  -3  13  -8   80.33    2.73   2 0.00000 0.00000 0.00000 0.00000 0.00000 0.00000
  -4  13  -7    9.52    1.49   2 0.00000 0.00000 0.00000 0.00000 0.00000 0.00000
  -5  13  -6  249.84    4.10   2 0.00000 0.00000 0.00000 0.00000 0.00000 0.00000
  -6  13  -5   -0.97    2.11   2 0.00000 0.00000 0.00000 0.00000 0.00000 0.00000
  -7  13  -4   29.59    4.86  -1 0.00000 0.00000 0.00000 0.00000 0.00000 0.00000
  -8  13  -2   29.59    4.86   2 0.00000 0.00000 0.00000 0.00000 0.00000 0.00000
  -8  13  -3  448.48    9.72  -1 0.00000 0.00000 0.00000 0.00000 0.00000 0.00000
  -8  13  -3  448.48    9.72   2 0.00000 0.00000 0.00000 0.00000 0.00000 0.00000
  -9  13  -2   19.06    4.81  -1 0.00000 0.00000 0.00000 0.00000 0.00000 0.00000
  -8  13  -4   19.06    4.81   2 0.00000 0.00000 0.00000 0.00000 0.00000 0.00000
 -10  13  -1   50.97    4.51   2 0.00000 0.00000 0.00000 0.00000 0.00000 0.00000
 -11  13   0    1.71    2.57   2 0.00000 0.00000 0.00000 0.00000 0.00000 0.00000
   1  12 -11    4.70    1.51   2 0.00000 0.00000 0.00000 0.00000 0.00000 0.00000
   0  12 -10  131.68    3.19   2 0.00000 0.00000 0.00000 0.00000 0.00000 0.00000
   0  12 -10  153.10    6.92  -1 0.00000 0.00000 0.00000 0.00000 0.00000 0.00000
  -8  12   6  153.10    6.92   2 0.00000 0.00000 0.00000 0.00000 0.00000 0.00000
  -1  12  -9   16.69    4.18  -1 0.00000 0.00000 0.00000 0.00000 0.00000 0.00000
  -8  12   5   16.69    4.18   2 0.00000 0.00000 0.00000 0.00000 0.00000 0.00000
  -2  12  -8  181.91    6.06  -1 0.00000 0.00000 0.00000 0.00000 0.00000 0.00000
  -8  12   4  181.91    6.06   2 0.00000 0.00000 0.00000 0.00000 0.00000 0.00000
  -3  12  -7  332.76    8.25  -1 0.00000 0.00000 0.00000 0.00000 0.00000 0.00000
  -8  12   3  332.76    8.25   2 0.00000 0.00000 0.00000 0.00000 0.00000 0.00000
  -4  12  -6    0.03    1.19   2 0.00000 0.00000 0.00000 0.00000 0.00000 0.00000
  -5  12  -5  134.94    2.99   2 0.00000 0.00000 0.00000 0.00000 0.00000 0.00000
  -6  12  -4   31.14    2.55   2 0.00000 0.00000 0.00000 0.00000 0.00000 0.00000
  -7  12  -3   42.20    2.71   2 0.00000 0.00000 0.00000 0.00000 0.00000 0.00000
  -8  12  -2  345.02    8.88  -1 0.00000 0.00000 0.00000 0.00000 0.00000 0.00000
  -7  12  -4  345.02    8.88   2 0.00000 0.00000 0.00000 0.00000 0.00000 0.00000
  -9  12  -1   92.48    3.71  -1 0.00000 0.00000 0.00000 0.00000 0.00000 0.00000
   7 -12   5   92.48    3.71   2 0.00000 0.00000 0.00000 0.00000 0.00000 0.00000
 -10  12   0   -1.67    2.79  -1 0.00000 0.00000 0.00000 0.00000 0.00000 0.00000
   7 -12   6   -1.67    2.79   2 0.00000 0.00000 0.00000 0.00000 0.00000 0.00000
 -11  12   1  329.02    6.56  -1 0.00000 0.00000 0.00000 0.00000 0.00000 0.00000
   7 -12   7  329.02    6.56   2 0.00000 0.00000 0.00000 0.00000 0.00000 0.00000
 -12  12   2   61.53    4.76   2 0.00000 0.00000 0.00000 0.00000 0.00000 0.00000
   3  11 -12   53.88    2.57   2 0.00000 0.00000 0.00000 0.00000 0.00000 0.00000
   2  11 -11   61.36    2.60   2 0.00000 0.00000 0.00000 0.00000 0.00000 0.00000
   1  11 -10   72.26    2.58   2 0.00000 0.00000 0.00000 0.00000 0.00000 0.00000
   0  11  -9   51.03    2.30   2 0.00000 0.00000 0.00000 0.00000 0.00000 0.00000
  -1  11  -8    4.59    1.27   2 0.00000 0.00000 0.00000 0.00000 0.00000 0.00000
  -2  11  -7  106.49    5.04  -1 0.00000 0.00000 0.00000 0.00000 0.00000 0.00000
  -7  11   3  106.49    5.04   2 0.00000 0.00000 0.00000 0.00000 0.00000 0.00000
  -3  11  -6  225.15    6.03  -1 0.00000 0.00000 0.00000 0.00000 0.00000 0.00000
  -7  11   2  225.15    6.03   2 0.00000 0.00000 0.00000 0.00000 0.00000 0.00000
  -4  11  -5    5.13    4.06  -1 0.00000 0.00000 0.00000 0.00000 0.00000 0.00000
  -7  11   1    5.13    4.06   2 0.00000 0.00000 0.00000 0.00000 0.00000 0.00000
  -5  11  -4   46.13    2.51   2 0.00000 0.00000 0.00000 0.00000 0.00000 0.00000
  -6  11  -3  348.33    5.29   2 0.00000 0.00000 0.00000 0.00000 0.00000 0.00000
  -7  11  -2   43.56    2.60   2 0.00000 0.00000 0.00000 0.00000 0.00000 0.00000
  -8  11  -1  148.52    3.61   2 0.00000 0.00000 0.00000 0.00000 0.00000 0.00000
  -9  11   0   52.67    2.68   2 0.00000 0.00000 0.00000 0.00000 0.00000 0.00000
 -10  11   1  199.77    4.88  -1 0.00000 0.00000 0.00000 0.00000 0.00000 0.00000
   6 -11   7  199.77    4.88   2 0.00000 0.00000 0.00000 0.00000 0.00000 0.00000
 -11  11   2  355.86    6.15  -1 0.00000 0.00000 0.00000 0.00000 0.00000 0.00000
   6 -11   8  355.86    6.15   2 0.00000 0.00000 0.00000 0.00000 0.00000 0.00000
 -12  11   3  105.23    6.73  -1 0.00000 0.00000 0.00000 0.00000 0.00000 0.00000
   6 -11   9  105.23    6.73   2 0.00000 0.00000 0.00000 0.00000 0.00000 0.00000
 -13  11   4    4.67    2.86   2 0.00000 0.00000 0.00000 0.00000 0.00000 0.00000
   4  10 -12    6.31    5.25  -1 0.00000 0.00000 0.00000 0.00000 0.00000 0.00000
  -7  10  10    6.31    5.25   2 0.00000 0.00000 0.00000 0.00000 0.00000 0.00000
   3  10 -11  138.18    7.19  -1 0.00000 0.00000 0.00000 0.00000 0.00000 0.00000
  -7  10   9  138.18    7.19   2 0.00000 0.00000 0.00000 0.00000 0.00000 0.00000
   2  10 -10  470.83    7.48  -1 0.00000 0.00000 0.00000 0.00000 0.00000 0.00000
  -7  10   8  470.83    7.48   2 0.00000 0.00000 0.00000 0.00000 0.00000 0.00000
   1  10  -9   64.88    2.30   2 0.00000 0.00000 0.00000 0.00000 0.00000 0.00000
   0  10  -8   67.13    2.28   2 0.00000 0.00000 0.00000 0.00000 0.00000 0.00000
  -1  10  -7  226.79    3.44   2 0.00000 0.00000 0.00000 0.00000 0.00000 0.00000
  -2  10  -6   12.26    1.26   2 0.00000 0.00000 0.00000 0.00000 0.00000 0.00000
  -4  10  -4   28.50    3.43  -1 0.00000 0.00000 0.00000 0.00000 0.00000 0.00000
  -6  10   0   28.50    3.43   2 0.00000 0.00000 0.00000 0.00000 0.00000 0.00000
  -5  10  -3   11.22    2.37  -1 0.00000 0.00000 0.00000 0.00000 0.00000 0.00000
  -6  10  -1   11.22    2.37   2 0.00000 0.00000 0.00000 0.00000 0.00000 0.00000
  -6  10  -2  472.34    6.08   2 0.00000 0.00000 0.00000 0.00000 0.00000 0.00000
  -7  10  -1  160.54    3.54   2 0.00000 0.00000 0.00000 0.00000 0.00000 0.00000
  -8  10   0   35.40    2.34   2 0.00000 0.00000 0.00000 0.00000 0.00000 0.00000
  -9  10   1  107.08    3.13   2 0.00000 0.00000 0.00000 0.00000 0.00000 0.00000
 -10  10   2   58.35    2.82   2 0.00000 0.00000 0.00000 0.00000 0.00000 0.00000
 -11  10   3  138.79    6.64  -1 0.00000 0.00000 0.00000 0.00000 0.00000 0.00000
   5 -10   9  138.79    6.64   2 0.00000 0.00000 0.00000 0.00000 0.00000 0.00000
 -12  10   4  187.29    6.95  -1 0.00000 0.00000 0.00000 0.00000 0.00000 0.00000
   5 -10  10  187.29    6.95   2 0.00000 0.00000 0.00000 0.00000 0.00000 0.00000
 -13  10   5  183.56    7.72  -1 0.00000 0.00000 0.00000 0.00000 0.00000 0.00000
   5 -10  11  183.56    7.72   2 0.00000 0.00000 0.00000 0.00000 0.00000 0.00000
   5   9 -12   13.10    1.63   2 0.00000 0.00000 0.00000 0.00000 0.00000 0.00000
   4   9 -11   -1.82    1.26   2 0.00000 0.00000 0.00000 0.00000 0.00000 0.00000
   3   9 -10  140.60    4.69  -1 0.00000 0.00000 0.00000 0.00000 0.00000 0.00000
  -6   9   8  140.60    4.69   2 0.00000 0.00000 0.00000 0.00000 0.00000 0.00000
   2   9  -9  152.14    3.17  -1 0.00000 0.00000 0.00000 0.00000 0.00000 0.00000
  -6   9   7  152.14    3.17   2 0.00000 0.00000 0.00000 0.00000 0.00000 0.00000
   1   9  -8   29.52    3.19  -1 0.00000 0.00000 0.00000 0.00000 0.00000 0.00000
  -6   9   6   29.52    3.19   2 0.00000 0.00000 0.00000 0.00000 0.00000 0.00000
   0   9  -7   38.12    1.87   2 0.00000 0.00000 0.00000 0.00000 0.00000 0.00000
  -1   9  -6  675.63    6.24   2 0.00000 0.00000 0.00000 0.00000 0.00000 0.00000
  -2   9  -5    6.01    1.03   2 0.00000 0.00000 0.00000 0.00000 0.00000 0.00000
  -3   9  -4  144.85    2.57   2 0.00000 0.00000 0.00000 0.00000 0.00000 0.00000
  -4   9  -3   64.52    1.95   2 0.00000 0.00000 0.00000 0.00000 0.00000 0.00000
  -5   9  -2  144.87    3.37  -1 0.00000 0.00000 0.00000 0.00000 0.00000 0.00000
  -5   9  -2  144.87    3.37   2 0.00000 0.00000 0.00000 0.00000 0.00000 0.00000
  -6   9  -1  477.15    4.96  -1 0.00000 0.00000 0.00000 0.00000 0.00000 0.00000
  -5   9  -3  477.15    4.96   2 0.00000 0.00000 0.00000 0.00000 0.00000 0.00000
  -7   9   0  101.69    2.75   2 0.00000 0.00000 0.00000 0.00000 0.00000 0.00000
  -8   9   1    4.39    1.33   2 0.00000 0.00000 0.00000 0.00000 0.00000 0.00000
  -9   9   2  150.95    3.50   2 0.00000 0.00000 0.00000 0.00000 0.00000 0.00000
 -10   9   3   50.01    2.65   2 0.00000 0.00000 0.00000 0.00000 0.00000 0.00000
 -11   9   4   39.70    2.20   2 0.00000 0.00000 0.00000 0.00000 0.00000 0.00000
 -13   9   6   78.21    5.88  -1 0.00000 0.00000 0.00000 0.00000 0.00000 0.00000
   4  -9  12   78.21    5.88   2 0.00000 0.00000 0.00000 0.00000 0.00000 0.00000
   6   8 -12   28.27    2.23   2 0.00000 0.00000 0.00000 0.00000 0.00000 0.00000
   5   8 -11   24.97    2.05   2 0.00000 0.00000 0.00000 0.00000 0.00000 0.00000
   4   8 -10   70.17    2.40   2 0.00000 0.00000 0.00000 0.00000 0.00000 0.00000
   3   8  -9   16.74    1.63   2 0.00000 0.00000 0.00000 0.00000 0.00000 0.00000
   2   8  -8   -1.89    2.75  -1 0.00000 0.00000 0.00000 0.00000 0.00000 0.00000
  -5   8   6   -1.89    2.75   2 0.00000 0.00000 0.00000 0.00000 0.00000 0.00000
   1   8  -7   71.82    2.66  -1 0.00000 0.00000 0.00000 0.00000 0.00000 0.00000
  -5   8   5   71.82    2.66   2 0.00000 0.00000 0.00000 0.00000 0.00000 0.00000
   0   8  -6  271.98    4.42  -1 0.00000 0.00000 0.00000 0.00000 0.00000 0.00000
  -5   8   4  271.98    4.42   2 0.00000 0.00000 0.00000 0.00000 0.00000 0.00000
  -1   8  -5  503.72    4.84   2 0.00000 0.00000 0.00000 0.00000 0.00000 0.00000
  -2   8  -4    2.46    0.82   2 0.00000 0.00000 0.00000 0.00000 0.00000 0.00000
  -3   8  -3   14.16    1.08   2 0.00000 0.00000 0.00000 0.00000 0.00000 0.00000
  -4   8  -2  712.51    6.07   2 0.00000 0.00000 0.00000 0.00000 0.00000 0.00000
  -5   8  -1   -0.10    0.94   2 0.00000 0.00000 0.00000 0.00000 0.00000 0.00000
  -6   8   0   85.72    2.52  -1 0.00000 0.00000 0.00000 0.00000 0.00000 0.00000
   4  -8   4   85.72    2.52   2 0.00000 0.00000 0.00000 0.00000 0.00000 0.00000
  -7   8   1  193.95    2.96  -1 0.00000 0.00000 0.00000 0.00000 0.00000 0.00000
   4  -8   5  193.95    2.96   2 0.00000 0.00000 0.00000 0.00000 0.00000 0.00000
  -8   8   2   30.13    2.88  -1 0.00000 0.00000 0.00000 0.00000 0.00000 0.00000
   4  -8   6   30.13    2.88   2 0.00000 0.00000 0.00000 0.00000 0.00000 0.00000
  -9   8   3  356.73    4.14   2 0.00000 0.00000 0.00000 0.00000 0.00000 0.00000
 -10   8   4   84.21    2.09   2 0.00000 0.00000 0.00000 0.00000 0.00000 0.00000
 -11   8   5    9.44    1.22   2 0.00000 0.00000 0.00000 0.00000 0.00000 0.00000
 -12   8   6   11.01    1.54   2 0.00000 0.00000 0.00000 0.00000 0.00000 0.00000
 -13   8   7   21.19    1.90   2 0.00000 0.00000 0.00000 0.00000 0.00000 0.00000
   7   7 -12   28.60    3.70  -1 0.00000 0.00000 0.00000 0.00000 0.00000 0.00000
  -5   7  12   28.60    3.70   2 0.00000 0.00000 0.00000 0.00000 0.00000 0.00000
   6   7 -11   -8.55    6.13  -1 0.00000 0.00000 0.00000 0.00000 0.00000 0.00000
  -5   7  11   -8.55    6.13   2 0.00000 0.00000 0.00000 0.00000 0.00000 0.00000
   5   7 -10  125.07    2.72   2 0.00000 0.00000 0.00000 0.00000 0.00000 0.00000
   4   7  -9  137.68    2.66   2 0.00000 0.00000 0.00000 0.00000 0.00000 0.00000
   3   7  -8    8.97    0.96   2 0.00000 0.00000 0.00000 0.00000 0.00000 0.00000
   2   7  -7    1.84    0.77   2 0.00000 0.00000 0.00000 0.00000 0.00000 0.00000
   1   7  -6  310.39    2.60   2 0.00000 0.00000 0.00000 0.00000 0.00000 0.00000
   0   7  -5  113.47    3.65  -1 0.00000 0.00000 0.00000 0.00000 0.00000 0.00000
  -4   7   3  113.47    3.65   2 0.00000 0.00000 0.00000 0.00000 0.00000 0.00000
  -1   7  -4  510.51    5.16  -1 0.00000 0.00000 0.00000 0.00000 0.00000 0.00000
  -4   7   2  510.51    5.16   2 0.00000 0.00000 0.00000 0.00000 0.00000 0.00000
  -2   7  -3   26.75    1.38   2 0.00000 0.00000 0.00000 0.00000 0.00000 0.00000
  -3   7  -2   84.42    1.73   2 0.00000 0.00000 0.00000 0.00000 0.00000 0.00000
  -4   7  -1  559.16    5.88   2 0.00000 0.00000 0.00000 0.00000 0.00000 0.00000
  -5   7   0    2.16    0.53   2 0.00000 0.00000 0.00000 0.00000 0.00000 0.00000
  -6   7   1   19.11    1.21   2 0.00000 0.00000 0.00000 0.00000 0.00000 0.00000
  -7   7   2  445.21    4.30   2 0.00000 0.00000 0.00000 0.00000 0.00000 0.00000
  -8   7   3  194.17    3.87  -1 0.00000 0.00000 0.00000 0.00000 0.00000 0.00000
   3  -7   7  194.17    3.87   2 0.00000 0.00000 0.00000 0.00000 0.00000 0.00000
  -9   7   4  142.94    3.76  -1 0.00000 0.00000 0.00000 0.00000 0.00000 0.00000
   3  -7   8  142.94    3.76   2 0.00000 0.00000 0.00000 0.00000 0.00000 0.00000
 -10   7   5   11.46    1.15   2 0.00000 0.00000 0.00000 0.00000 0.00000 0.00000
 -11   7   6   23.49    1.93   2 0.00000 0.00000 0.00000 0.00000 0.00000 0.00000
 -12   7   7   10.05    1.57   2 0.00000 0.00000 0.00000 0.00000 0.00000 0.00000
 -13   7   8  114.95    3.25   2 0.00000 0.00000 0.00000 0.00000 0.00000 0.00000
   8   6 -12   61.27    2.47   2 0.00000 0.00000 0.00000 0.00000 0.00000 0.00000
   7   6 -11   67.73    4.32  -1 0.00000 0.00000 0.00000 0.00000 0.00000 0.00000
  -4   6  11   67.73    4.32   2 0.00000 0.00000 0.00000 0.00000 0.00000 0.00000
   6   6 -10   12.66    2.79  -1 0.00000 0.00000 0.00000 0.00000 0.00000 0.00000
  -4   6  10   12.66    2.79   2 0.00000 0.00000 0.00000 0.00000 0.00000 0.00000
   5   6  -9  623.57    8.77  -1 0.00000 0.00000 0.00000 0.00000 0.00000 0.00000
  -4   6   9  623.57    8.77   2 0.00000 0.00000 0.00000 0.00000 0.00000 0.00000
   4   6  -8  186.91    2.47   2 0.00000 0.00000 0.00000 0.00000 0.00000 0.00000
   3   6  -7   27.29    1.36   2 0.00000 0.00000 0.00000 0.00000 0.00000 0.00000
   2   6  -6   53.85    1.35   2 0.00000 0.00000 0.00000 0.00000 0.00000 0.00000
   1   6  -5  836.73    5.09   2 0.00000 0.00000 0.00000 0.00000 0.00000 0.00000
   0   6  -4   19.42    0.82   2 0.00000 0.00000 0.00000 0.00000 0.00000 0.00000
  -2   6  -2 3471.38   27.98  -1 0.00000 0.00000 0.00000 0.00000 0.00000 0.00000
  -3   6   0 3471.38   27.98   2 0.00000 0.00000 0.00000 0.00000 0.00000 0.00000
  -3   6  -1   82.95    1.95   2 0.00000 0.00000 0.00000 0.00000 0.00000 0.00000
  -4   6   0  149.62    1.79   2 0.00000 0.00000 0.00000 0.00000 0.00000 0.00000
  -5   6   1  150.84    1.99   2 0.00000 0.00000 0.00000 0.00000 0.00000 0.00000
  -6   6   2   29.47    1.33   2 0.00000 0.00000 0.00000 0.00000 0.00000 0.00000
  -7   6   3  593.92    5.30   2 0.00000 0.00000 0.00000 0.00000 0.00000 0.00000
  -8   6   4  182.32    2.47   2 0.00000 0.00000 0.00000 0.00000 0.00000 0.00000
  -9   6   5  356.18    5.51  -1 0.00000 0.00000 0.00000 0.00000 0.00000 0.00000
   2  -6   9  356.18    5.51   2 0.00000 0.00000 0.00000 0.00000 0.00000 0.00000
 -10   6   6  283.01    7.30  -1 0.00000 0.00000 0.00000 0.00000 0.00000 0.00000
   2  -6  10  283.01    7.30   2 0.00000 0.00000 0.00000 0.00000 0.00000 0.00000
 -11   6   7  357.11    9.17  -1 0.00000 0.00000 0.00000 0.00000 0.00000 0.00000
   2  -6  11  357.11    9.17   2 0.00000 0.00000 0.00000 0.00000 0.00000 0.00000
 -12   6   8    2.79    1.49   2 0.00000 0.00000 0.00000 0.00000 0.00000 0.00000
 -13   6   9   20.52    2.01   2 0.00000 0.00000 0.00000 0.00000 0.00000 0.00000
   9   5 -12    8.98    1.48   2 0.00000 0.00000 0.00000 0.00000 0.00000 0.00000
   8   5 -11    3.44    1.26   2 0.00000 0.00000 0.00000 0.00000 0.00000 0.00000
   7   5 -10   85.99    2.43   2 0.00000 0.00000 0.00000 0.00000 0.00000 0.00000
   6   5  -9  574.17   12.66  -1 0.00000 0.00000 0.00000 0.00000 0.00000 0.00000
  -3   5   9  574.17   12.66   2 0.00000 0.00000 0.00000 0.00000 0.00000 0.00000
   5   5  -8  341.58    5.76  -1 0.00000 0.00000 0.00000 0.00000 0.00000 0.00000
  -3   5   8  341.58    5.76   2 0.00000 0.00000 0.00000 0.00000 0.00000 0.00000
   4   5  -7   50.00    3.04  -1 0.00000 0.00000 0.00000 0.00000 0.00000 0.00000
  -3   5   7   50.00    3.04   2 0.00000 0.00000 0.00000 0.00000 0.00000 0.00000
   3   5  -6  318.44    2.92   2 0.00000 0.00000 0.00000 0.00000 0.00000 0.00000
   2   5  -5  140.26    1.75   2 0.00000 0.00000 0.00000 0.00000 0.00000 0.00000
   1   5  -4  340.61    2.71   2 0.00000 0.00000 0.00000 0.00000 0.00000 0.00000
   0   5  -3   29.51    0.80   2 0.00000 0.00000 0.00000 0.00000 0.00000 0.00000
  -1   5  -2   14.77    1.08   2 0.00000 0.00000 0.00000 0.00000 0.00000 0.00000
  -2   5  -1 4417.14   28.53   2 0.00000 0.00000 0.00000 0.00000 0.00000 0.00000
  -3   5   0  117.10    1.85  -1 0.00000 0.00000 0.00000 0.00000 0.00000 0.00000
  -2   5  -2  117.10    1.85   2 0.00000 0.00000 0.00000 0.00000 0.00000 0.00000
  -4   5   1  265.93    3.24   2 0.00000 0.00000 0.00000 0.00000 0.00000 0.00000
  -4   5   1  589.42    8.82  -1 0.00000 0.00000 0.00000 0.00000 0.00000 0.00000
   2  -5   3  589.42    8.82   2 0.00000 0.00000 0.00000 0.00000 0.00000 0.00000
  -5   5   2  403.55    4.49   2 0.00000 0.00000 0.00000 0.00000 0.00000 0.00000
  -6   5   3  176.73    2.88   2 0.00000 0.00000 0.00000 0.00000 0.00000 0.00000
  -7   5   4  564.29    5.12   2 0.00000 0.00000 0.00000 0.00000 0.00000 0.00000
  -8   5   5   16.40    1.72   2 0.00000 0.00000 0.00000 0.00000 0.00000 0.00000
  -9   5   6  135.39    3.32   2 0.00000 0.00000 0.00000 0.00000 0.00000 0.00000
 -10   5   7  186.23    4.83  -1 0.00000 0.00000 0.00000 0.00000 0.00000 0.00000
   1  -5  11  186.23    4.83   2 0.00000 0.00000 0.00000 0.00000 0.00000 0.00000
 -11   5   8  649.10    8.64  -1 0.00000 0.00000 0.00000 0.00000 0.00000 0.00000
   1  -5  12  649.10    8.64   2 0.00000 0.00000 0.00000 0.00000 0.00000 0.00000
 -12   5   9    2.28    3.48  -1 0.00000 0.00000 0.00000 0.00000 0.00000 0.00000
   1  -5  13    2.28    3.48   2 0.00000 0.00000 0.00000 0.00000 0.00000 0.00000
 -13   5  10    5.92    1.82   2 0.00000 0.00000 0.00000 0.00000 0.00000 0.00000
  10   4 -12  400.76   11.27  -1 0.00000 0.00000 0.00000 0.00000 0.00000 0.00000
  -3   4  14  400.76   11.27   2 0.00000 0.00000 0.00000 0.00000 0.00000 0.00000
   9   4 -11  101.51    2.47   2 0.00000 0.00000 0.00000 0.00000 0.00000 0.00000
   8   4 -10   37.98    2.05   2 0.00000 0.00000 0.00000 0.00000 0.00000 0.00000
   7   4  -9  122.38    2.58   2 0.00000 0.00000 0.00000 0.00000 0.00000 0.00000
   6   4  -8  449.38    4.66   2 0.00000 0.00000 0.00000 0.00000 0.00000 0.00000
   5   4  -7  122.08    2.26   2 0.00000 0.00000 0.00000 0.00000 0.00000 0.00000
   4   4  -6    5.08    1.38  -1 0.00000 0.00000 0.00000 0.00000 0.00000 0.00000
  -2   4   6    5.08    1.38   2 0.00000 0.00000 0.00000 0.00000 0.00000 0.00000
   3   4  -5 1474.47   11.17  -1 0.00000 0.00000 0.00000 0.00000 0.00000 0.00000
  -2   4   5 1474.47   11.17   2 0.00000 0.00000 0.00000 0.00000 0.00000 0.00000
   2   4  -4  153.71    1.69   2 0.00000 0.00000 0.00000 0.00000 0.00000 0.00000
   2   4  -4  532.73    9.87  -1 0.00000 0.00000 0.00000 0.00000 0.00000 0.00000
  -2   4   4  532.73    9.87   2 0.00000 0.00000 0.00000 0.00000 0.00000 0.00000
   1   4  -3  314.75    2.42   2 0.00000 0.00000 0.00000 0.00000 0.00000 0.00000
   0   4  -2  368.31    2.65   2 0.00000 0.00000 0.00000 0.00000 0.00000 0.00000
  -1   4  -1   38.77    1.07   2 0.00000 0.00000 0.00000 0.00000 0.00000 0.00000
  -2   4   0  442.89    4.24   2 0.00000 0.00000 0.00000 0.00000 0.00000 0.00000
  -3   4   1  259.32    2.94   2 0.00000 0.00000 0.00000 0.00000 0.00000 0.00000
  -4   4   2  104.92    1.71  -1 0.00000 0.00000 0.00000 0.00000 0.00000 0.00000
   1  -4   4  104.92    1.71   2 0.00000 0.00000 0.00000 0.00000 0.00000 0.00000
  -5   4   3 2080.40   12.59  -1 0.00000 0.00000 0.00000 0.00000 0.00000 0.00000
   1  -4   5 2080.40   12.59   2 0.00000 0.00000 0.00000 0.00000 0.00000 0.00000
  -6   4   4   21.52    1.35   2 0.00000 0.00000 0.00000 0.00000 0.00000 0.00000
  -7   4   5  485.35    5.71   2 0.00000 0.00000 0.00000 0.00000 0.00000 0.00000
  -8   4   6   -1.50    1.17   2 0.00000 0.00000 0.00000 0.00000 0.00000 0.00000
  -9   4   7  161.02    3.63   2 0.00000 0.00000 0.00000 0.00000 0.00000 0.00000
 -10   4   8   76.40    3.07   2 0.00000 0.00000 0.00000 0.00000 0.00000 0.00000
 -11   4   9   55.88    5.81  -1 0.00000 0.00000 0.00000 0.00000 0.00000 0.00000
   0  -4  13   55.88    5.81   2 0.00000 0.00000 0.00000 0.00000 0.00000 0.00000
 -12   4  10  179.41    5.00  -1 0.00000 0.00000 0.00000 0.00000 0.00000 0.00000
   0  -4  14  179.41    5.00   2 0.00000 0.00000 0.00000 0.00000 0.00000 0.00000
 -13   4  11   83.97    4.33  -1 0.00000 0.00000 0.00000 0.00000 0.00000 0.00000
   0  -4  15   83.97    4.33   2 0.00000 0.00000 0.00000 0.00000 0.00000 0.00000
  10   3 -11    5.10    4.48  -1 0.00000 0.00000 0.00000 0.00000 0.00000 0.00000
  -2   3  13    5.10    4.48   2 0.00000 0.00000 0.00000 0.00000 0.00000 0.00000
   9   3 -10  271.13    6.36  -1 0.00000 0.00000 0.00000 0.00000 0.00000 0.00000
  -2   3  12  271.13    6.36   2 0.00000 0.00000 0.00000 0.00000 0.00000 0.00000
   8   3  -9  126.68    2.66   2 0.00000 0.00000 0.00000 0.00000 0.00000 0.00000
   7   3  -8  369.29    4.17   2 0.00000 0.00000 0.00000 0.00000 0.00000 0.00000
   6   3  -7  198.12    2.82   2 0.00000 0.00000 0.00000 0.00000 0.00000 0.00000
   5   3  -6   27.84    1.10   2 0.00000 0.00000 0.00000 0.00000 0.00000 0.00000
   4   3  -5   -0.28    0.47   2 0.00000 0.00000 0.00000 0.00000 0.00000 0.00000
   3   3  -4  643.85    7.39  -1 0.00000 0.00000 0.00000 0.00000 0.00000 0.00000
  -1   3   4  643.85    7.39   2 0.00000 0.00000 0.00000 0.00000 0.00000 0.00000
   2   3  -3 1417.74   13.57  -1 0.00000 0.00000 0.00000 0.00000 0.00000 0.00000
  -1   3   3 1417.74   13.57   2 0.00000 0.00000 0.00000 0.00000 0.00000 0.00000
   1   3  -2   36.75    0.97   2 0.00000 0.00000 0.00000 0.00000 0.00000 0.00000
   0   3  -1  440.42    3.29   2 0.00000 0.00000 0.00000 0.00000 0.00000 0.00000
  -1   3   0    0.10    0.49   2 0.00000 0.00000 0.00000 0.00000 0.00000 0.00000
  -2   3   1  110.15    1.56   2 0.00000 0.00000 0.00000 0.00000 0.00000 0.00000
  -3   3   2  393.00    3.88   2 0.00000 0.00000 0.00000 0.00000 0.00000 0.00000
  -4   3   3  244.61    3.00   2 0.00000 0.00000 0.00000 0.00000 0.00000 0.00000
  -5   3   4 1363.96   10.14  -1 0.00000 0.00000 0.00000 0.00000 0.00000 0.00000
   0  -3   6 1363.96   10.14   2 0.00000 0.00000 0.00000 0.00000 0.00000 0.00000
  -6   3   5   14.90    1.49  -1 0.00000 0.00000 0.00000 0.00000 0.00000 0.00000
   0  -3   7   14.90    1.49   2 0.00000 0.00000 0.00000 0.00000 0.00000 0.00000
  -7   3   6  159.77    3.00  -1 0.00000 0.00000 0.00000 0.00000 0.00000 0.00000
   0  -3   8  159.77    3.00   2 0.00000 0.00000 0.00000 0.00000 0.00000 0.00000
  -8   3   7  104.16    2.99   2 0.00000 0.00000 0.00000 0.00000 0.00000 0.00000
  -9   3   8  195.28    3.96   2 0.00000 0.00000 0.00000 0.00000 0.00000 0.00000
 -10   3   9   34.95    2.76   2 0.00000 0.00000 0.00000 0.00000 0.00000 0.00000
 -11   3  10   17.08    1.73   2 0.00000 0.00000 0.00000 0.00000 0.00000 0.00000
 -12   3  11  114.60    4.06   2 0.00000 0.00000 0.00000 0.00000 0.00000 0.00000
  11   2 -11   13.96    1.56   2 0.00000 0.00000 0.00000 0.00000 0.00000 0.00000
  10   2 -10   10.21    1.36   2 0.00000 0.00000 0.00000 0.00000 0.00000 0.00000
   9   2  -9   77.70    5.20  -1 0.00000 0.00000 0.00000 0.00000 0.00000 0.00000
  -1   2  11   77.70    5.20   2 0.00000 0.00000 0.00000 0.00000 0.00000 0.00000
   8   2  -8  247.82    3.98  -1 0.00000 0.00000 0.00000 0.00000 0.00000 0.00000
  -1   2  10  247.82    3.98   2 0.00000 0.00000 0.00000 0.00000 0.00000 0.00000
   7   2  -7  650.28    8.02  -1 0.00000 0.00000 0.00000 0.00000 0.00000 0.00000
  -1   2   9  650.28    8.02   2 0.00000 0.00000 0.00000 0.00000 0.00000 0.00000
   7   2  -7  251.28    4.10   2 0.00000 0.00000 0.00000 0.00000 0.00000 0.00000
   6   2  -6  148.19    2.94   2 0.00000 0.00000 0.00000 0.00000 0.00000 0.00000
   5   2  -5  437.00    5.03   2 0.00000 0.00000 0.00000 0.00000 0.00000 0.00000
   4   2  -4  353.63    3.33   2 0.00000 0.00000 0.00000 0.00000 0.00000 0.00000
   3   2  -3  175.95    1.71   2 0.00000 0.00000 0.00000 0.00000 0.00000 0.00000
   2   2  -2  254.84    5.65  -1 0.00000 0.00000 0.00000 0.00000 0.00000 0.00000
   0   2   2  254.84    5.65   2 0.00000 0.00000 0.00000 0.00000 0.00000 0.00000
   1   2  -1  423.06    3.10   2 0.00000 0.00000 0.00000 0.00000 0.00000 0.00000
   1   2  -1  734.94    7.24  -1 0.00000 0.00000 0.00000 0.00000 0.00000 0.00000
   0   2   1  734.94    7.24   2 0.00000 0.00000 0.00000 0.00000 0.00000 0.00000
   0   2   0  906.02   10.21   2 0.00000 0.00000 0.00000 0.00000 0.00000 0.00000
  -1   2   1  110.50    2.15   2 0.00000 0.00000 0.00000 0.00000 0.00000 0.00000
  -2   2   2   23.10    1.68   2 0.00000 0.00000 0.00000 0.00000 0.00000 0.00000
  -3   2   3    3.10    0.97   2 0.00000 0.00000 0.00000 0.00000 0.00000 0.00000
  -4   2   4  194.82    2.80   2 0.00000 0.00000 0.00000 0.00000 0.00000 0.00000
  -5   2   5 1044.57    9.52   2 0.00000 0.00000 0.00000 0.00000 0.00000 0.00000
  -6   2   6  266.46    3.50  -1 0.00000 0.00000 0.00000 0.00000 0.00000 0.00000
  -1  -2   8  266.46    3.50   2 0.00000 0.00000 0.00000 0.00000 0.00000 0.00000
  -7   2   7  556.87    6.82  -1 0.00000 0.00000 0.00000 0.00000 0.00000 0.00000
  -1  -2   9  556.87    6.82   2 0.00000 0.00000 0.00000 0.00000 0.00000 0.00000
  -8   2   8  407.21    6.08  -1 0.00000 0.00000 0.00000 0.00000 0.00000 0.00000
  -1  -2  10  407.21    6.08   2 0.00000 0.00000 0.00000 0.00000 0.00000 0.00000
  -9   2   9   16.93    2.04   2 0.00000 0.00000 0.00000 0.00000 0.00000 0.00000
 -10   2  10   -1.55    1.60   2 0.00000 0.00000 0.00000 0.00000 0.00000 0.00000
 -11   2  11    5.72    2.71   2 0.00000 0.00000 0.00000 0.00000 0.00000 0.00000
 -12   2  12  243.99    5.52   2 0.00000 0.00000 0.00000 0.00000 0.00000 0.00000
  12   1 -11   81.58    2.68   2 0.00000 0.00000 0.00000 0.00000 0.00000 0.00000
  11   1 -10   18.32    2.20   2 0.00000 0.00000 0.00000 0.00000 0.00000 0.00000
  10   1  -9   57.15    2.75   2 0.00000 0.00000 0.00000 0.00000 0.00000 0.00000
   9   1  -8   56.95    2.60   2 0.00000 0.00000 0.00000 0.00000 0.00000 0.00000
   8   1  -7  406.06    5.88  -1 0.00000 0.00000 0.00000 0.00000 0.00000 0.00000
   0   1   9  406.06    5.88   2 0.00000 0.00000 0.00000 0.00000 0.00000 0.00000
   7   1  -6   48.52    2.10  -1 0.00000 0.00000 0.00000 0.00000 0.00000 0.00000
   0   1   8   48.52    2.10   2 0.00000 0.00000 0.00000 0.00000 0.00000 0.00000
   6   1  -5  408.77    4.65  -1 0.00000 0.00000 0.00000 0.00000 0.00000 0.00000
   0   1   7  408.77    4.65   2 0.00000 0.00000 0.00000 0.00000 0.00000 0.00000
   5   1  -4  540.66    4.58   2 0.00000 0.00000 0.00000 0.00000 0.00000 0.00000
   4   1  -3   28.00    1.01   2 0.00000 0.00000 0.00000 0.00000 0.00000 0.00000
   3   1  -2  284.21    2.21   2 0.00000 0.00000 0.00000 0.00000 0.00000 0.00000
   2   1  -1    3.58    0.28   2 0.00000 0.00000 0.00000 0.00000 0.00000 0.00000
   1   1   0  110.94    1.31   2 0.00000 0.00000 0.00000 0.00000 0.00000 0.00000
   0   1   1 4494.75   62.01  -1 0.00000 0.00000 0.00000 0.00000 0.00000 0.00000
   1   1  -1 4494.75   62.01   2 0.00000 0.00000 0.00000 0.00000 0.00000 0.00000
  -1   1   2  569.16    7.24  -1 0.00000 0.00000 0.00000 0.00000 0.00000 0.00000
  -1  -1   2  569.16    7.24   2 0.00000 0.00000 0.00000 0.00000 0.00000 0.00000
  -2   1   3 2192.12   17.49   2 0.00000 0.00000 0.00000 0.00000 0.00000 0.00000
  -3   1   4  257.00    3.14   2 0.00000 0.00000 0.00000 0.00000 0.00000 0.00000
  -4   1   5  567.92    5.75   2 0.00000 0.00000 0.00000 0.00000 0.00000 0.00000
  -5   1   6  217.16    3.32   2 0.00000 0.00000 0.00000 0.00000 0.00000 0.00000
  -6   1   7   37.44    2.15   2 0.00000 0.00000 0.00000 0.00000 0.00000 0.00000
  -7   1   8  243.35    4.08   2 0.00000 0.00000 0.00000 0.00000 0.00000 0.00000
  -8   1   9  140.07    3.91  -1 0.00000 0.00000 0.00000 0.00000 0.00000 0.00000
  -2  -1  11  140.07    3.91   2 0.00000 0.00000 0.00000 0.00000 0.00000 0.00000
  -9   1  10  149.35    4.13  -1 0.00000 0.00000 0.00000 0.00000 0.00000 0.00000
  -2  -1  12  149.35    4.13   2 0.00000 0.00000 0.00000 0.00000 0.00000 0.00000
 -10   1  11  173.00    6.90  -1 0.00000 0.00000 0.00000 0.00000 0.00000 0.00000
  -2  -1  13  173.00    6.90   2 0.00000 0.00000 0.00000 0.00000 0.00000 0.00000
 -11   1  12    4.50    2.68   2 0.00000 0.00000 0.00000 0.00000 0.00000 0.00000
 -12   1  13   52.79    5.53   2 0.00000 0.00000 0.00000 0.00000 0.00000 0.00000
  12   0 -10    4.98    1.73   2 0.00000 0.00000 0.00000 0.00000 0.00000 0.00000
  11   0  -9   41.75    2.68   2 0.00000 0.00000 0.00000 0.00000 0.00000 0.00000
  10   0  -8  139.05    3.55   2 0.00000 0.00000 0.00000 0.00000 0.00000 0.00000
   9   0  -7  321.40    4.88   2 0.00000 0.00000 0.00000 0.00000 0.00000 0.00000
   8   0  -6  292.07    3.60   2 0.00000 0.00000 0.00000 0.00000 0.00000 0.00000
   7   0  -5  805.32    8.72  -1 0.00000 0.00000 0.00000 0.00000 0.00000 0.00000
   1   0   7  805.32    8.72   2 0.00000 0.00000 0.00000 0.00000 0.00000 0.00000
   6   0  -4  353.65    3.95  -1 0.00000 0.00000 0.00000 0.00000 0.00000 0.00000
   1   0   6  353.65    3.95   2 0.00000 0.00000 0.00000 0.00000 0.00000 0.00000
   5   0  -3 1305.70   12.09  -1 0.00000 0.00000 0.00000 0.00000 0.00000 0.00000
   1   0   5 1305.70   12.09   2 0.00000 0.00000 0.00000 0.00000 0.00000 0.00000
   4   0  -2  165.30    1.66   2 0.00000 0.00000 0.00000 0.00000 0.00000 0.00000
   3   0  -1  453.25    3.55   2 0.00000 0.00000 0.00000 0.00000 0.00000 0.00000
   2   0   0  315.83    2.83   2 0.00000 0.00000 0.00000 0.00000 0.00000 0.00000
   1   0   1  112.36    1.38   2 0.00000 0.00000 0.00000 0.00000 0.00000 0.00000
   0   0   2  151.92    1.34   2 0.00000 0.00000 0.00000 0.00000 0.00000 0.00000
  -1   0   3 5224.26   41.02  -1 0.00000 0.00000 0.00000 0.00000 0.00000 0.00000
  -2   0   3 5224.26   41.02   2 0.00000 0.00000 0.00000 0.00000 0.00000 0.00000
  -2   0   4 4612.89   32.29  -1 0.00000 0.00000 0.00000 0.00000 0.00000 0.00000
  -2   0   4 4612.89   32.29   2 0.00000 0.00000 0.00000 0.00000 0.00000 0.00000
  -3   0   5 4107.00   28.88  -1 0.00000 0.00000 0.00000 0.00000 0.00000 0.00000
  -2   0   5 4107.00   28.88   2 0.00000 0.00000 0.00000 0.00000 0.00000 0.00000
  -4   0   6  282.18    5.44   2 0.00000 0.00000 0.00000 0.00000 0.00000 0.00000
  -5   0   7  241.71    5.24   2 0.00000 0.00000 0.00000 0.00000 0.00000 0.00000
  -6   0   8  415.57    7.47   2 0.00000 0.00000 0.00000 0.00000 0.00000 0.00000
  -7   0   9  143.04    4.75   2 0.00000 0.00000 0.00000 0.00000 0.00000 0.00000
  -8   0  10    5.41    2.18   2 0.00000 0.00000 0.00000 0.00000 0.00000 0.00000
  -9   0  11   66.37    3.82  -1 0.00000 0.00000 0.00000 0.00000 0.00000 0.00000
  -3   0  13   66.37    3.82   2 0.00000 0.00000 0.00000 0.00000 0.00000 0.00000
 -10   0  12  479.88    7.42  -1 0.00000 0.00000 0.00000 0.00000 0.00000 0.00000
  -3   0  14  479.88    7.42   2 0.00000 0.00000 0.00000 0.00000 0.00000 0.00000
 -11   0  13  -12.71    6.11  -1 0.00000 0.00000 0.00000 0.00000 0.00000 0.00000
  -3   0  15  -12.71    6.11   2 0.00000 0.00000 0.00000 0.00000 0.00000 0.00000
  13  -1 -10   16.46    5.35  -1 0.00000 0.00000 0.00000 0.00000 0.00000 0.00000
   1  -1  14   16.46    5.35   2 0.00000 0.00000 0.00000 0.00000 0.00000 0.00000
  12  -1  -9   10.05    2.97  -1 0.00000 0.00000 0.00000 0.00000 0.00000 0.00000
   1  -1  13   10.05    2.97   2 0.00000 0.00000 0.00000 0.00000 0.00000 0.00000
  11  -1  -8  347.56    6.45  -1 0.00000 0.00000 0.00000 0.00000 0.00000 0.00000
   1  -1  12  347.56    6.45   2 0.00000 0.00000 0.00000 0.00000 0.00000 0.00000
  10  -1  -7  240.82    4.37   2 0.00000 0.00000 0.00000 0.00000 0.00000 0.00000
   9  -1  -6   88.03    2.81   2 0.00000 0.00000 0.00000 0.00000 0.00000 0.00000
   8  -1  -5   99.90    2.16   2 0.00000 0.00000 0.00000 0.00000 0.00000 0.00000
   7  -1  -4  640.61    5.48   2 0.00000 0.00000 0.00000 0.00000 0.00000 0.00000
   5  -1  -2 3259.32   27.57  -1 0.00000 0.00000 0.00000 0.00000 0.00000 0.00000
   2  -1   4 3259.32   27.57   2 0.00000 0.00000 0.00000 0.00000 0.00000 0.00000
   4  -1  -1   27.67    2.65  -1 0.00000 0.00000 0.00000 0.00000 0.00000 0.00000
   2  -1   3   27.67    2.65   2 0.00000 0.00000 0.00000 0.00000 0.00000 0.00000
   3  -1   0    0.56    0.35   2 0.00000 0.00000 0.00000 0.00000 0.00000 0.00000
   2  -1   1 2176.62   17.30   2 0.00000 0.00000 0.00000 0.00000 0.00000 0.00000
   1  -1   2    5.05    0.53   2 0.00000 0.00000 0.00000 0.00000 0.00000 0.00000
   0  -1   3   27.76    1.13   2 0.00000 0.00000 0.00000 0.00000 0.00000 0.00000
  -1  -1   4  148.74    1.94   2 0.00000 0.00000 0.00000 0.00000 0.00000 0.00000
  -2  -1   5 1350.59   18.87  -1 0.00000 0.00000 0.00000 0.00000 0.00000 0.00000
  -3   1   5 1350.59   18.87   2 0.00000 0.00000 0.00000 0.00000 0.00000 0.00000
  -3  -1   6  943.05    7.63  -1 0.00000 0.00000 0.00000 0.00000 0.00000 0.00000
  -3   1   6  943.05    7.63   2 0.00000 0.00000 0.00000 0.00000 0.00000 0.00000
  -4  -1   7  840.98    6.12  -1 0.00000 0.00000 0.00000 0.00000 0.00000 0.00000
  -3   1   7  840.98    6.12   2 0.00000 0.00000 0.00000 0.00000 0.00000 0.00000
  -5  -1   8  647.21    7.34   2 0.00000 0.00000 0.00000 0.00000 0.00000 0.00000
  -6  -1   9  429.18    5.88   2 0.00000 0.00000 0.00000 0.00000 0.00000 0.00000
  -7  -1  10  107.06    3.37   2 0.00000 0.00000 0.00000 0.00000 0.00000 0.00000
  -8  -1  11    6.82    1.90   2 0.00000 0.00000 0.00000 0.00000 0.00000 0.00000
  -9  -1  12   13.56    2.26   2 0.00000 0.00000 0.00000 0.00000 0.00000 0.00000
 -10  -1  13  346.71   10.45  -1 0.00000 0.00000 0.00000 0.00000 0.00000 0.00000
  -4   1  15  346.71   10.45   2 0.00000 0.00000 0.00000 0.00000 0.00000 0.00000
  13  -2  -9   15.14    2.01   2 0.00000 0.00000 0.00000 0.00000 0.00000 0.00000
  12  -2  -8   92.84    5.63  -1 0.00000 0.00000 0.00000 0.00000 0.00000 0.00000
   2  -2  12   92.84    5.63   2 0.00000 0.00000 0.00000 0.00000 0.00000 0.00000
  11  -2  -7   90.72    3.41  -1 0.00000 0.00000 0.00000 0.00000 0.00000 0.00000
   2  -2  11   90.72    3.41   2 0.00000 0.00000 0.00000 0.00000 0.00000 0.00000
  10  -2  -6  232.10    5.08  -1 0.00000 0.00000 0.00000 0.00000 0.00000 0.00000
   2  -2  10  232.10    5.08   2 0.00000 0.00000 0.00000 0.00000 0.00000 0.00000
   9  -2  -5    9.08    1.10   2 0.00000 0.00000 0.00000 0.00000 0.00000 0.00000
   8  -2  -4   87.08    1.76   2 0.00000 0.00000 0.00000 0.00000 0.00000 0.00000
   7  -2  -3  195.57    2.26   2 0.00000 0.00000 0.00000 0.00000 0.00000 0.00000
   6  -2  -2   59.95    1.12   2 0.00000 0.00000 0.00000 0.00000 0.00000 0.00000
   5  -2  -1  595.79    3.65   2 0.00000 0.00000 0.00000 0.00000 0.00000 0.00000
   4  -2   0  813.26    5.17   2 0.00000 0.00000 0.00000 0.00000 0.00000 0.00000
   3  -2   1   51.19    1.15  -1 0.00000 0.00000 0.00000 0.00000 0.00000 0.00000
   3  -2   1   51.19    1.15   2 0.00000 0.00000 0.00000 0.00000 0.00000 0.00000
   2  -2   2  164.32    1.73   2 0.00000 0.00000 0.00000 0.00000 0.00000 0.00000
   1  -2   3   41.34    1.00   2 0.00000 0.00000 0.00000 0.00000 0.00000 0.00000
   0  -2   4   18.48    1.16   2 0.00000 0.00000 0.00000 0.00000 0.00000 0.00000
  -1  -2   5  278.31    2.91   2 0.00000 0.00000 0.00000 0.00000 0.00000 0.00000
  -2  -2   6   55.47    2.00   2 0.00000 0.00000 0.00000 0.00000 0.00000 0.00000
  -3  -2   7   42.22    1.98   2 0.00000 0.00000 0.00000 0.00000 0.00000 0.00000
  -4  -2   8 1478.00   11.74  -1 0.00000 0.00000 0.00000 0.00000 0.00000 0.00000
  -4   2   8 1478.00   11.74   2 0.00000 0.00000 0.00000 0.00000 0.00000 0.00000
  -5  -2   9  482.07    5.15  -1 0.00000 0.00000 0.00000 0.00000 0.00000 0.00000
  -4   2   9  482.07    5.15   2 0.00000 0.00000 0.00000 0.00000 0.00000 0.00000
  -6  -2  10  198.32    4.47  -1 0.00000 0.00000 0.00000 0.00000 0.00000 0.00000
  -4   2  10  198.32    4.47   2 0.00000 0.00000 0.00000 0.00000 0.00000 0.00000
  -7  -2  11  112.05    3.50   2 0.00000 0.00000 0.00000 0.00000 0.00000 0.00000
  -8  -2  12   54.91    3.15   2 0.00000 0.00000 0.00000 0.00000 0.00000 0.00000
  -9  -2  13   67.74    3.55   2 0.00000 0.00000 0.00000 0.00000 0.00000 0.00000
 -10  -2  14   41.29    3.49   2 0.00000 0.00000 0.00000 0.00000 0.00000 0.00000
  13  -3  -8   80.57    3.28   2 0.00000 0.00000 0.00000 0.00000 0.00000 0.00000
  12  -3  -7   42.57    2.73   2 0.00000 0.00000 0.00000 0.00000 0.00000 0.00000
  11  -3  -6   59.80    5.14  -1 0.00000 0.00000 0.00000 0.00000 0.00000 0.00000
   3  -3  10   59.80    5.14   2 0.00000 0.00000 0.00000 0.00000 0.00000 0.00000
  10  -3  -5   51.39    3.93  -1 0.00000 0.00000 0.00000 0.00000 0.00000 0.00000
   3  -3   9   51.39    3.93   2 0.00000 0.00000 0.00000 0.00000 0.00000 0.00000
   9  -3  -4  180.96    5.79  -1 0.00000 0.00000 0.00000 0.00000 0.00000 0.00000
   3  -3   8  180.96    5.79   2 0.00000 0.00000 0.00000 0.00000 0.00000 0.00000
   8  -3  -3    2.81    0.74   2 0.00000 0.00000 0.00000 0.00000 0.00000 0.00000
   7  -3  -2  168.19    1.79   2 0.00000 0.00000 0.00000 0.00000 0.00000 0.00000
   6  -3  -1    1.39    0.45   2 0.00000 0.00000 0.00000 0.00000 0.00000 0.00000
   5  -3   0   33.59    1.05   2 0.00000 0.00000 0.00000 0.00000 0.00000 0.00000
   4  -3   1 1424.62    7.66   2 0.00000 0.00000 0.00000 0.00000 0.00000 0.00000
   3  -3   2  355.06    3.12   2 0.00000 0.00000 0.00000 0.00000 0.00000 0.00000
   2  -3   3   30.89    1.20  -1 0.00000 0.00000 0.00000 0.00000 0.00000 0.00000
   4  -3  -1   30.89    1.20   2 0.00000 0.00000 0.00000 0.00000 0.00000 0.00000
   1  -3   4  176.33    1.85   2 0.00000 0.00000 0.00000 0.00000 0.00000 0.00000
   0  -3   5   94.79    1.75   2 0.00000 0.00000 0.00000 0.00000 0.00000 0.00000
  -1  -3   6  191.98    2.56   2 0.00000 0.00000 0.00000 0.00000 0.00000 0.00000
  -2  -3   7    5.11    0.91   2 0.00000 0.00000 0.00000 0.00000 0.00000 0.00000
  -3  -3   8   89.79    2.62   2 0.00000 0.00000 0.00000 0.00000 0.00000 0.00000
  -4  -3   9  297.61    4.59   2 0.00000 0.00000 0.00000 0.00000 0.00000 0.00000
  -5  -3  10  154.15    3.36  -1 0.00000 0.00000 0.00000 0.00000 0.00000 0.00000
  -5   3  10  154.15    3.36   2 0.00000 0.00000 0.00000 0.00000 0.00000 0.00000
  -6  -3  11    9.94    2.39  -1 0.00000 0.00000 0.00000 0.00000 0.00000 0.00000
  -5   3  11    9.94    2.39   2 0.00000 0.00000 0.00000 0.00000 0.00000 0.00000
  -7  -3  12   98.45    6.47  -1 0.00000 0.00000 0.00000 0.00000 0.00000 0.00000
  -5   3  12   98.45    6.47   2 0.00000 0.00000 0.00000 0.00000 0.00000 0.00000
  -8  -3  13  118.07    3.94   2 0.00000 0.00000 0.00000 0.00000 0.00000 0.00000
  -9  -3  14   73.34    3.78   2 0.00000 0.00000 0.00000 0.00000 0.00000 0.00000
  13  -4  -7   79.80    3.26   2 0.00000 0.00000 0.00000 0.00000 0.00000 0.00000
  12  -4  -6   21.47    2.47   2 0.00000 0.00000 0.00000 0.00000 0.00000 0.00000
  11  -4  -5    1.00    1.14   2 0.00000 0.00000 0.00000 0.00000 0.00000 0.00000
  10  -4  -4   31.45    1.91   2 0.00000 0.00000 0.00000 0.00000 0.00000 0.00000
   9  -4  -3  774.46   12.49  -1 0.00000 0.00000 0.00000 0.00000 0.00000 0.00000
   4  -4   7  774.46   12.49   2 0.00000 0.00000 0.00000 0.00000 0.00000 0.00000
   8  -4  -2   65.05    2.14  -1 0.00000 0.00000 0.00000 0.00000 0.00000 0.00000
   4  -4   6   65.05    2.14   2 0.00000 0.00000 0.00000 0.00000 0.00000 0.00000
   6  -4   0  313.52    2.76   2 0.00000 0.00000 0.00000 0.00000 0.00000 0.00000
   5  -4   1    5.88    0.50   2 0.00000 0.00000 0.00000 0.00000 0.00000 0.00000
   4  -4   2  918.59    6.88   2 0.00000 0.00000 0.00000 0.00000 0.00000 0.00000
   3  -4   3    1.14    0.60   2 0.00000 0.00000 0.00000 0.00000 0.00000 0.00000
   2  -4   4    3.43    0.60   2 0.00000 0.00000 0.00000 0.00000 0.00000 0.00000
   1  -4   5 2065.32   17.31  -1 0.00000 0.00000 0.00000 0.00000 0.00000 0.00000
  -5   4   3 2065.32   17.31   2 0.00000 0.00000 0.00000 0.00000 0.00000 0.00000
   0  -4   6   75.61    3.24  -1 0.00000 0.00000 0.00000 0.00000 0.00000 0.00000
  -5   4   4   75.61    3.24   2 0.00000 0.00000 0.00000 0.00000 0.00000 0.00000
  -1  -4   7    1.50    0.69   2 0.00000 0.00000 0.00000 0.00000 0.00000 0.00000
  -2  -4   8  246.94    3.23   2 0.00000 0.00000 0.00000 0.00000 0.00000 0.00000
  -3  -4   9  327.65    4.05   2 0.00000 0.00000 0.00000 0.00000 0.00000 0.00000
  -4  -4  10   60.20    2.33   2 0.00000 0.00000 0.00000 0.00000 0.00000 0.00000
  -5  -4  11   65.52    2.94   2 0.00000 0.00000 0.00000 0.00000 0.00000 0.00000
  -7  -4  13  105.63    6.35  -1 0.00000 0.00000 0.00000 0.00000 0.00000 0.00000
  -6   4  13  105.63    6.35   2 0.00000 0.00000 0.00000 0.00000 0.00000 0.00000
  -8  -4  14  209.91    8.38  -1 0.00000 0.00000 0.00000 0.00000 0.00000 0.00000
  -6   4  14  209.91    8.38   2 0.00000 0.00000 0.00000 0.00000 0.00000 0.00000
  14  -5  -7   30.89    2.85   2 0.00000 0.00000 0.00000 0.00000 0.00000 0.00000
  13  -5  -6   56.48    2.98   2 0.00000 0.00000 0.00000 0.00000 0.00000 0.00000
  12  -5  -5   32.24    2.14   2 0.00000 0.00000 0.00000 0.00000 0.00000 0.00000
  11  -5  -4   52.09    2.18   2 0.00000 0.00000 0.00000 0.00000 0.00000 0.00000
  10  -5  -3   26.68    1.82   2 0.00000 0.00000 0.00000 0.00000 0.00000 0.00000
   9  -5  -2  508.55    4.40   2 0.00000 0.00000 0.00000 0.00000 0.00000 0.00000
   8  -5  -1    5.44    3.68  -1 0.00000 0.00000 0.00000 0.00000 0.00000 0.00000
   5  -5   5    5.44    3.68   2 0.00000 0.00000 0.00000 0.00000 0.00000 0.00000
   7  -5   0   73.83    2.24  -1 0.00000 0.00000 0.00000 0.00000 0.00000 0.00000
   5  -5   4   73.83    2.24   2 0.00000 0.00000 0.00000 0.00000 0.00000 0.00000
   6  -5   1 1398.78   10.35   2 0.00000 0.00000 0.00000 0.00000 0.00000 0.00000
   5  -5   2  141.11    2.16   2 0.00000 0.00000 0.00000 0.00000 0.00000 0.00000
   4  -5   3  251.88    2.86   2 0.00000 0.00000 0.00000 0.00000 0.00000 0.00000
   3  -5   4  126.20    2.00   2 0.00000 0.00000 0.00000 0.00000 0.00000 0.00000
   2  -5   5   17.55    1.11   2 0.00000 0.00000 0.00000 0.00000 0.00000 0.00000
   1  -5   6  637.42    4.76   2 0.00000 0.00000 0.00000 0.00000 0.00000 0.00000
   0  -5   7  205.66    5.23  -1 0.00000 0.00000 0.00000 0.00000 0.00000 0.00000
  -6   5   5  205.66    5.23   2 0.00000 0.00000 0.00000 0.00000 0.00000 0.00000
  -1  -5   8   28.61    2.09  -1 0.00000 0.00000 0.00000 0.00000 0.00000 0.00000
  -6   5   6   28.61    2.09   2 0.00000 0.00000 0.00000 0.00000 0.00000 0.00000
  -2  -5   9  606.71    9.96  -1 0.00000 0.00000 0.00000 0.00000 0.00000 0.00000
  -6   5   7  606.71    9.96   2 0.00000 0.00000 0.00000 0.00000 0.00000 0.00000
  -3  -5  10  179.37    2.71   2 0.00000 0.00000 0.00000 0.00000 0.00000 0.00000
  -4  -5  11    7.27    1.23   2 0.00000 0.00000 0.00000 0.00000 0.00000 0.00000
  -5  -5  12   53.24    2.11   2 0.00000 0.00000 0.00000 0.00000 0.00000 0.00000
  -6  -5  13  281.52    3.84   2 0.00000 0.00000 0.00000 0.00000 0.00000 0.00000
  -7  -5  14   50.64    2.40   2 0.00000 0.00000 0.00000 0.00000 0.00000 0.00000
  14  -6  -6  162.18    6.89  -1 0.00000 0.00000 0.00000 0.00000 0.00000 0.00000
   5  -6  12  162.18    6.89   2 0.00000 0.00000 0.00000 0.00000 0.00000 0.00000
  13  -6  -5  267.23    8.22  -1 0.00000 0.00000 0.00000 0.00000 0.00000 0.00000
   5  -6  11  267.23    8.22   2 0.00000 0.00000 0.00000 0.00000 0.00000 0.00000
  12  -6  -4   38.40    2.61   2 0.00000 0.00000 0.00000 0.00000 0.00000 0.00000
  12  -6  -4  168.21    7.36  -1 0.00000 0.00000 0.00000 0.00000 0.00000 0.00000
   5  -6  10  168.21    7.36   2 0.00000 0.00000 0.00000 0.00000 0.00000 0.00000
  11  -6  -3  191.06    3.30   2 0.00000 0.00000 0.00000 0.00000 0.00000 0.00000
  10  -6  -2   37.05    1.93   2 0.00000 0.00000 0.00000 0.00000 0.00000 0.00000
   9  -6  -1   78.22    1.86   2 0.00000 0.00000 0.00000 0.00000 0.00000 0.00000
   8  -6   0  308.96    3.69   2 0.00000 0.00000 0.00000 0.00000 0.00000 0.00000
   7  -6   1   82.37    1.96   2 0.00000 0.00000 0.00000 0.00000 0.00000 0.00000
   6  -6   2 5016.36   40.73  -1 0.00000 0.00000 0.00000 0.00000 0.00000 0.00000
   6  -6   2 5016.36   40.73   2 0.00000 0.00000 0.00000 0.00000 0.00000 0.00000
   5  -6   3    8.78    2.05  -1 0.00000 0.00000 0.00000 0.00000 0.00000 0.00000
   6  -6   1    8.78    2.05   2 0.00000 0.00000 0.00000 0.00000 0.00000 0.00000
   4  -6   4    0.60    0.72   2 0.00000 0.00000 0.00000 0.00000 0.00000 0.00000
   3  -6   5  488.21    4.62   2 0.00000 0.00000 0.00000 0.00000 0.00000 0.00000
   2  -6   6    8.76    0.81   2 0.00000 0.00000 0.00000 0.00000 0.00000 0.00000
   1  -6   7   61.58    1.60   2 0.00000 0.00000 0.00000 0.00000 0.00000 0.00000
   0  -6   8    8.95    0.93   2 0.00000 0.00000 0.00000 0.00000 0.00000 0.00000
  -1  -6   9  255.66    6.50  -1 0.00000 0.00000 0.00000 0.00000 0.00000 0.00000
  -7   6   7  255.66    6.50   2 0.00000 0.00000 0.00000 0.00000 0.00000 0.00000
  -2  -6  10  628.97    7.73  -1 0.00000 0.00000 0.00000 0.00000 0.00000 0.00000
  -7   6   8  628.97    7.73   2 0.00000 0.00000 0.00000 0.00000 0.00000 0.00000
  -3  -6  11  365.28    4.97  -1 0.00000 0.00000 0.00000 0.00000 0.00000 0.00000
  -7   6   9  365.28    4.97   2 0.00000 0.00000 0.00000 0.00000 0.00000 0.00000
  -4  -6  12   31.82    1.89   2 0.00000 0.00000 0.00000 0.00000 0.00000 0.00000
  -5  -6  13   -0.93    1.20   2 0.00000 0.00000 0.00000 0.00000 0.00000 0.00000
  -6  -6  14  147.52    3.51   2 0.00000 0.00000 0.00000 0.00000 0.00000 0.00000
  14  -7  -5   72.88    2.83   2 0.00000 0.00000 0.00000 0.00000 0.00000 0.00000
  13  -7  -4  123.73    6.43  -1 0.00000 0.00000 0.00000 0.00000 0.00000 0.00000
   6  -7  10  123.73    6.43   2 0.00000 0.00000 0.00000 0.00000 0.00000 0.00000
  12  -7  -3   21.52    4.12  -1 0.00000 0.00000 0.00000 0.00000 0.00000 0.00000
   6  -7   9   21.52    4.12   2 0.00000 0.00000 0.00000 0.00000 0.00000 0.00000
  11  -7  -2  590.91   11.86  -1 0.00000 0.00000 0.00000 0.00000 0.00000 0.00000
   6  -7   8  590.91   11.86   2 0.00000 0.00000 0.00000 0.00000 0.00000 0.00000
  10  -7  -1   37.47    1.92   2 0.00000 0.00000 0.00000 0.00000 0.00000 0.00000
   9  -7   0    2.61    1.00   2 0.00000 0.00000 0.00000 0.00000 0.00000 0.00000
   8  -7   1   95.70    2.84   2 0.00000 0.00000 0.00000 0.00000 0.00000 0.00000
   7  -7   2   37.85    2.28   2 0.00000 0.00000 0.00000 0.00000 0.00000 0.00000
   6  -7   3 1186.17   11.50   2 0.00000 0.00000 0.00000 0.00000 0.00000 0.00000
   5  -7   4  728.81    6.30  -1 0.00000 0.00000 0.00000 0.00000 0.00000 0.00000
   7  -7   0  728.81    6.30   2 0.00000 0.00000 0.00000 0.00000 0.00000 0.00000
   4  -7   5   16.37    1.51  -1 0.00000 0.00000 0.00000 0.00000 0.00000 0.00000
  -7   7   1   16.37    1.51   2 0.00000 0.00000 0.00000 0.00000 0.00000 0.00000
   3  -7   6  681.68    6.12   2 0.00000 0.00000 0.00000 0.00000 0.00000 0.00000
   2  -7   7    2.49    0.84   2 0.00000 0.00000 0.00000 0.00000 0.00000 0.00000
   1  -7   8   36.17    1.63   2 0.00000 0.00000 0.00000 0.00000 0.00000 0.00000
   0  -7   9   25.84    1.62   2 0.00000 0.00000 0.00000 0.00000 0.00000 0.00000
  -1  -7  10  263.24    3.28   2 0.00000 0.00000 0.00000 0.00000 0.00000 0.00000
  -2  -7  11   46.92    5.32  -1 0.00000 0.00000 0.00000 0.00000 0.00000 0.00000
  -8   7   9   46.92    5.32   2 0.00000 0.00000 0.00000 0.00000 0.00000 0.00000
  -3  -7  12  120.72    6.48  -1 0.00000 0.00000 0.00000 0.00000 0.00000 0.00000
  -8   7  10  120.72    6.48   2 0.00000 0.00000 0.00000 0.00000 0.00000 0.00000
  -4  -7  13  102.12    6.29  -1 0.00000 0.00000 0.00000 0.00000 0.00000 0.00000
  -8   7  11  102.12    6.29   2 0.00000 0.00000 0.00000 0.00000 0.00000 0.00000
  -5  -7  14   15.96    1.82   2 0.00000 0.00000 0.00000 0.00000 0.00000 0.00000
  13  -8  -3   25.33    2.76   2 0.00000 0.00000 0.00000 0.00000 0.00000 0.00000
  12  -8  -2  156.98    7.07  -1 0.00000 0.00000 0.00000 0.00000 0.00000 0.00000
   7  -8   8  156.98    7.07   2 0.00000 0.00000 0.00000 0.00000 0.00000 0.00000
  11  -8  -1  529.00   10.77  -1 0.00000 0.00000 0.00000 0.00000 0.00000 0.00000
   7  -8   7  529.00   10.77   2 0.00000 0.00000 0.00000 0.00000 0.00000 0.00000
  10  -8   0   11.53    4.67  -1 0.00000 0.00000 0.00000 0.00000 0.00000 0.00000
   7  -8   6   11.53    4.67   2 0.00000 0.00000 0.00000 0.00000 0.00000 0.00000
   9  -8   1    5.89    1.46   2 0.00000 0.00000 0.00000 0.00000 0.00000 0.00000
   8  -8   2  187.69    3.88   2 0.00000 0.00000 0.00000 0.00000 0.00000 0.00000
   7  -8   3    2.19    1.28   2 0.00000 0.00000 0.00000 0.00000 0.00000 0.00000
   6  -8   4   38.31    2.35   2 0.00000 0.00000 0.00000 0.00000 0.00000 0.00000
   5  -8   5  126.04    3.13   2 0.00000 0.00000 0.00000 0.00000 0.00000 0.00000
   4  -8   6   27.51    2.03  -1 0.00000 0.00000 0.00000 0.00000 0.00000 0.00000
  -8   8   2   27.51    2.03   2 0.00000 0.00000 0.00000 0.00000 0.00000 0.00000
   3  -8   7  882.04    7.40  -1 0.00000 0.00000 0.00000 0.00000 0.00000 0.00000
  -8   8   3  882.04    7.40   2 0.00000 0.00000 0.00000 0.00000 0.00000 0.00000
   2  -8   8   89.81    3.13  -1 0.00000 0.00000 0.00000 0.00000 0.00000 0.00000
  -8   8   4   89.81    3.13   2 0.00000 0.00000 0.00000 0.00000 0.00000 0.00000
   1  -8   9    4.56    1.02   2 0.00000 0.00000 0.00000 0.00000 0.00000 0.00000
   0  -8  10  286.51    3.46   2 0.00000 0.00000 0.00000 0.00000 0.00000 0.00000
  -1  -8  11   18.58    1.68   2 0.00000 0.00000 0.00000 0.00000 0.00000 0.00000
  -2  -8  12   -0.17    1.30   2 0.00000 0.00000 0.00000 0.00000 0.00000 0.00000
  -3  -8  13    4.43    1.49   2 0.00000 0.00000 0.00000 0.00000 0.00000 0.00000
  -4  -8  14  324.75   10.15  -1 0.00000 0.00000 0.00000 0.00000 0.00000 0.00000
  -9   8  12  324.75   10.15   2 0.00000 0.00000 0.00000 0.00000 0.00000 0.00000
  13  -9  -2  128.37    3.85   2 0.00000 0.00000 0.00000 0.00000 0.00000 0.00000
  12  -9  -1   72.69    3.09   2 0.00000 0.00000 0.00000 0.00000 0.00000 0.00000
  11  -9   0   72.60    6.08  -1 0.00000 0.00000 0.00000 0.00000 0.00000 0.00000
   8  -9   6   72.60    6.08   2 0.00000 0.00000 0.00000 0.00000 0.00000 0.00000
  11  -9   0   11.95    2.74   2 0.00000 0.00000 0.00000 0.00000 0.00000 0.00000
  10  -9   1   50.43    4.52  -1 0.00000 0.00000 0.00000 0.00000 0.00000 0.00000
   8  -9   5   50.43    4.52   2 0.00000 0.00000 0.00000 0.00000 0.00000 0.00000
   9  -9   2   40.25    4.43  -1 0.00000 0.00000 0.00000 0.00000 0.00000 0.00000
   8  -9   4   40.25    4.43   2 0.00000 0.00000 0.00000 0.00000 0.00000 0.00000
   8  -9   3  443.44    6.26   2 0.00000 0.00000 0.00000 0.00000 0.00000 0.00000
   7  -9   4    1.50    1.39   2 0.00000 0.00000 0.00000 0.00000 0.00000 0.00000
   6  -9   5   16.65    1.72   2 0.00000 0.00000 0.00000 0.00000 0.00000 0.00000
   5  -9   6  130.75    3.35   2 0.00000 0.00000 0.00000 0.00000 0.00000 0.00000
   4  -9   7   34.01    2.42   2 0.00000 0.00000 0.00000 0.00000 0.00000 0.00000
   2  -9   9    5.06    3.59  -1 0.00000 0.00000 0.00000 0.00000 0.00000 0.00000
  -9   9   5    5.06    3.59   2 0.00000 0.00000 0.00000 0.00000 0.00000 0.00000
   1  -9  10   51.56    4.51  -1 0.00000 0.00000 0.00000 0.00000 0.00000 0.00000
  -9   9   6   51.56    4.51   2 0.00000 0.00000 0.00000 0.00000 0.00000 0.00000
   0  -9  11  171.77    3.40   2 0.00000 0.00000 0.00000 0.00000 0.00000 0.00000
  -1  -9  12    6.92    1.48   2 0.00000 0.00000 0.00000 0.00000 0.00000 0.00000
  -2  -9  13    6.50    1.57   2 0.00000 0.00000 0.00000 0.00000 0.00000 0.00000
  -3  -9  14   31.36    2.50   2 0.00000 0.00000 0.00000 0.00000 0.00000 0.00000
  13 -10  -1   80.21    3.43   2 0.00000 0.00000 0.00000 0.00000 0.00000 0.00000
  12 -10   0    0.11    1.64   2 0.00000 0.00000 0.00000 0.00000 0.00000 0.00000
  11 -10   1   20.23    3.12   2 0.00000 0.00000 0.00000 0.00000 0.00000 0.00000
  10 -10   2  115.26    5.26   2 0.00000 0.00000 0.00000 0.00000 0.00000 0.00000
   9 -10   3   22.01    4.34  -1 0.00000 0.00000 0.00000 0.00000 0.00000 0.00000
   9 -10   3   22.01    4.34   2 0.00000 0.00000 0.00000 0.00000 0.00000 0.00000
   8 -10   4  329.10    5.51  -1 0.00000 0.00000 0.00000 0.00000 0.00000 0.00000
   9 -10   2  329.10    5.51   2 0.00000 0.00000 0.00000 0.00000 0.00000 0.00000
   7 -10   5  152.37    4.26  -1 0.00000 0.00000 0.00000 0.00000 0.00000 0.00000
   9 -10   1  152.37    4.26   2 0.00000 0.00000 0.00000 0.00000 0.00000 0.00000
   6 -10   6    1.96    1.49   2 0.00000 0.00000 0.00000 0.00000 0.00000 0.00000
   5 -10   7  327.94    5.42   2 0.00000 0.00000 0.00000 0.00000 0.00000 0.00000
   4 -10   8   28.92    2.53   2 0.00000 0.00000 0.00000 0.00000 0.00000 0.00000
   3 -10   9   13.48    1.82   2 0.00000 0.00000 0.00000 0.00000 0.00000 0.00000
   2 -10  10   52.30    2.96   2 0.00000 0.00000 0.00000 0.00000 0.00000 0.00000
   1 -10  11  132.82    6.01  -1 0.00000 0.00000 0.00000 0.00000 0.00000 0.00000
 -10  10   7  132.82    6.01   2 0.00000 0.00000 0.00000 0.00000 0.00000 0.00000
   0 -10  12   26.00    4.16  -1 0.00000 0.00000 0.00000 0.00000 0.00000 0.00000
 -10  10   8   26.00    4.16   2 0.00000 0.00000 0.00000 0.00000 0.00000 0.00000
  -1 -10  13    9.17    2.07   2 0.00000 0.00000 0.00000 0.00000 0.00000 0.00000
  -1 -10  13   41.38    4.31  -1 0.00000 0.00000 0.00000 0.00000 0.00000 0.00000
 -10  10   9   41.38    4.31   2 0.00000 0.00000 0.00000 0.00000 0.00000 0.00000
  12 -11   1    1.68    2.58   2 0.00000 0.00000 0.00000 0.00000 0.00000 0.00000
  11 -11   2   28.71    3.94   2 0.00000 0.00000 0.00000 0.00000 0.00000 0.00000
  10 -11   3  159.53    6.26   2 0.00000 0.00000 0.00000 0.00000 0.00000 0.00000
   9 -11   4   -0.23    2.36   2 0.00000 0.00000 0.00000 0.00000 0.00000 0.00000
   8 -11   5   75.70    3.82  -1 0.00000 0.00000 0.00000 0.00000 0.00000 0.00000
  10 -11   1   75.70    3.82   2 0.00000 0.00000 0.00000 0.00000 0.00000 0.00000
   7 -11   6  340.28    5.69  -1 0.00000 0.00000 0.00000 0.00000 0.00000 0.00000
 -10  11   0  340.28    5.69   2 0.00000 0.00000 0.00000 0.00000 0.00000 0.00000
   6 -11   7  199.53    6.68  -1 0.00000 0.00000 0.00000 0.00000 0.00000 0.00000
 -10  11   1  199.53    6.68   2 0.00000 0.00000 0.00000 0.00000 0.00000 0.00000
   5 -11   8  117.37    3.68   2 0.00000 0.00000 0.00000 0.00000 0.00000 0.00000
   4 -11   9   57.41    3.06   2 0.00000 0.00000 0.00000 0.00000 0.00000 0.00000
   3 -11  10   51.11    3.04   2 0.00000 0.00000 0.00000 0.00000 0.00000 0.00000
   2 -11  11  169.30    4.47   2 0.00000 0.00000 0.00000 0.00000 0.00000 0.00000
   1 -11  12   40.95    3.17   2 0.00000 0.00000 0.00000 0.00000 0.00000 0.00000
   0 -11  13    5.13    2.07   2 0.00000 0.00000 0.00000 0.00000 0.00000 0.00000
  11 -12   3    6.71    2.99   2 0.00000 0.00000 0.00000 0.00000 0.00000 0.00000
  10 -12   4   34.17    4.20   2 0.00000 0.00000 0.00000 0.00000 0.00000 0.00000
   9 -12   5    8.12    2.94   2 0.00000 0.00000 0.00000 0.00000 0.00000 0.00000
   8 -12   6    2.28    1.84   2 0.00000 0.00000 0.00000 0.00000 0.00000 0.00000
   7 -12   7  323.13    8.99  -1 0.00000 0.00000 0.00000 0.00000 0.00000 0.00000
 -11  12   1  323.13    8.99   2 0.00000 0.00000 0.00000 0.00000 0.00000 0.00000
   6 -12   8  166.46    6.59  -1 0.00000 0.00000 0.00000 0.00000 0.00000 0.00000
 -11  12   2  166.46    6.59   2 0.00000 0.00000 0.00000 0.00000 0.00000 0.00000
   5 -12   9   75.21    5.10  -1 0.00000 0.00000 0.00000 0.00000 0.00000 0.00000
 -11  12   3   75.21    5.10   2 0.00000 0.00000 0.00000 0.00000 0.00000 0.00000
   4 -12  10  150.30    6.97  -1 0.00000 0.00000 0.00000 0.00000 0.00000 0.00000
 -11  12   4  150.30    6.97   2 0.00000 0.00000 0.00000 0.00000 0.00000 0.00000
   3 -12  11   80.32    3.62   2 0.00000 0.00000 0.00000 0.00000 0.00000 0.00000
  -3  14  -8   11.29    1.99   2 0.00000 0.00000 0.00000 0.00000 0.00000 0.00000
  -4  14  -7   63.72    4.45   2 0.00000 0.00000 0.00000 0.00000 0.00000 0.00000
  -5  14  -6    0.49    2.32   2 0.00000 0.00000 0.00000 0.00000 0.00000 0.00000
  -6  14  -5   78.14    6.30  -1 0.00000 0.00000 0.00000 0.00000 0.00000 0.00000
  -8  14  -1   78.14    6.30   2 0.00000 0.00000 0.00000 0.00000 0.00000 0.00000
  -6  14  -5   65.09    4.63   2 0.00000 0.00000 0.00000 0.00000 0.00000 0.00000
  -7  14  -4  304.31    8.34  -1 0.00000 0.00000 0.00000 0.00000 0.00000 0.00000
  -8  14  -2  304.31    8.34   2 0.00000 0.00000 0.00000 0.00000 0.00000 0.00000
  -8  14  -3   98.23    5.37  -1 0.00000 0.00000 0.00000 0.00000 0.00000 0.00000
  -8  14  -3   98.23    5.37   2 0.00000 0.00000 0.00000 0.00000 0.00000 0.00000
  -9  14  -2  139.70    6.83  -1 0.00000 0.00000 0.00000 0.00000 0.00000 0.00000
  -8  14  -4  139.70    6.83   2 0.00000 0.00000 0.00000 0.00000 0.00000 0.00000
 -10  14  -1    3.55    2.66   2 0.00000 0.00000 0.00000 0.00000 0.00000 0.00000
   0  13 -10  124.57    6.12  -1 0.00000 0.00000 0.00000 0.00000 0.00000 0.00000
  -8  13   6  124.57    6.12   2 0.00000 0.00000 0.00000 0.00000 0.00000 0.00000
  -1  13  -9  151.62    5.87  -1 0.00000 0.00000 0.00000 0.00000 0.00000 0.00000
  -8  13   5  151.62    5.87   2 0.00000 0.00000 0.00000 0.00000 0.00000 0.00000
  -2  13  -8   25.68    4.38  -1 0.00000 0.00000 0.00000 0.00000 0.00000 0.00000
  -8  13   4   25.68    4.38   2 0.00000 0.00000 0.00000 0.00000 0.00000 0.00000
  -3  13  -7    7.01    2.49   2 0.00000 0.00000 0.00000 0.00000 0.00000 0.00000
  -3  13  -7  107.03    6.04  -1 0.00000 0.00000 0.00000 0.00000 0.00000 0.00000
  -8  13   3  107.03    6.04   2 0.00000 0.00000 0.00000 0.00000 0.00000 0.00000
  -4  13  -6  142.19    3.92   2 0.00000 0.00000 0.00000 0.00000 0.00000 0.00000
  -5  13  -5   -3.88    1.93   2 0.00000 0.00000 0.00000 0.00000 0.00000 0.00000
  -6  13  -4    5.25    2.32   2 0.00000 0.00000 0.00000 0.00000 0.00000 0.00000
  -7  13  -3  166.59    5.86   2 0.00000 0.00000 0.00000 0.00000 0.00000 0.00000
  -8  13  -2   26.45    4.96  -1 0.00000 0.00000 0.00000 0.00000 0.00000 0.00000
  -7  13  -4   26.45    4.96   2 0.00000 0.00000 0.00000 0.00000 0.00000 0.00000
  -9  13  -1   99.08    3.64  -1 0.00000 0.00000 0.00000 0.00000 0.00000 0.00000
  -7  13  -5   99.08    3.64   2 0.00000 0.00000 0.00000 0.00000 0.00000 0.00000
 -10  13   0  158.09    4.78  -1 0.00000 0.00000 0.00000 0.00000 0.00000 0.00000
   7 -13   6  158.09    4.78   2 0.00000 0.00000 0.00000 0.00000 0.00000 0.00000
 -11  13   1   45.24    4.49   2 0.00000 0.00000 0.00000 0.00000 0.00000 0.00000
   2  12 -11   47.15    4.01   2 0.00000 0.00000 0.00000 0.00000 0.00000 0.00000
   1  12 -10  120.73    3.08   2 0.00000 0.00000 0.00000 0.00000 0.00000 0.00000
   0  12  -9   30.18    2.16   2 0.00000 0.00000 0.00000 0.00000 0.00000 0.00000
  -1  12  -8   71.52    2.53   2 0.00000 0.00000 0.00000 0.00000 0.00000 0.00000
  -1  12  -8  135.38    6.27  -1 0.00000 0.00000 0.00000 0.00000 0.00000 0.00000
  -7  12   4  135.38    6.27   2 0.00000 0.00000 0.00000 0.00000 0.00000 0.00000
  -2  12  -7  262.38    6.88  -1 0.00000 0.00000 0.00000 0.00000 0.00000 0.00000
  -7  12   3  262.38    6.88   2 0.00000 0.00000 0.00000 0.00000 0.00000 0.00000
  -3  12  -6   89.33    4.55  -1 0.00000 0.00000 0.00000 0.00000 0.00000 0.00000
  -7  12   2   89.33    4.55   2 0.00000 0.00000 0.00000 0.00000 0.00000 0.00000
  -4  12  -5  135.71    5.89  -1 0.00000 0.00000 0.00000 0.00000 0.00000 0.00000
  -7  12   1  135.71    5.89   2 0.00000 0.00000 0.00000 0.00000 0.00000 0.00000
  -5  12  -4   85.54    4.36   2 0.00000 0.00000 0.00000 0.00000 0.00000 0.00000
  -6  12  -3   20.40    3.38   2 0.00000 0.00000 0.00000 0.00000 0.00000 0.00000
  -7  12  -2  347.57    7.88   2 0.00000 0.00000 0.00000 0.00000 0.00000 0.00000
  -8  12  -1   22.10    3.48   2 0.00000 0.00000 0.00000 0.00000 0.00000 0.00000
  -9  12   0   25.89    5.23  -1 0.00000 0.00000 0.00000 0.00000 0.00000 0.00000
   6 -12   6   25.89    5.23   2 0.00000 0.00000 0.00000 0.00000 0.00000 0.00000
 -10  12   1  487.05    7.38  -1 0.00000 0.00000 0.00000 0.00000 0.00000 0.00000
   6 -12   7  487.05    7.38   2 0.00000 0.00000 0.00000 0.00000 0.00000 0.00000
 -11  12   2  148.52    4.52  -1 0.00000 0.00000 0.00000 0.00000 0.00000 0.00000
   6 -12   8  148.52    4.52   2 0.00000 0.00000 0.00000 0.00000 0.00000 0.00000
 -12  12   3  131.15    5.12  -1 0.00000 0.00000 0.00000 0.00000 0.00000 0.00000
   6 -12   9  131.15    5.12   2 0.00000 0.00000 0.00000 0.00000 0.00000 0.00000
   3  11 -11   73.65    6.93  -1 0.00000 0.00000 0.00000 0.00000 0.00000 0.00000
  -7  11   9   73.65    6.93   2 0.00000 0.00000 0.00000 0.00000 0.00000 0.00000
   2  11 -10   78.44    2.62   2 0.00000 0.00000 0.00000 0.00000 0.00000 0.00000
   1  11  -9  330.39    4.46   2 0.00000 0.00000 0.00000 0.00000 0.00000 0.00000
   0  11  -8   19.29    1.57   2 0.00000 0.00000 0.00000 0.00000 0.00000 0.00000
  -1  11  -7    0.69    1.13   2 0.00000 0.00000 0.00000 0.00000 0.00000 0.00000
  -2  11  -6  376.32    4.54   2 0.00000 0.00000 0.00000 0.00000 0.00000 0.00000
  -3  11  -5   13.44    3.87  -1 0.00000 0.00000 0.00000 0.00000 0.00000 0.00000
  -6  11   1   13.44    3.87   2 0.00000 0.00000 0.00000 0.00000 0.00000 0.00000
  -4  11  -4   20.59    3.11  -1 0.00000 0.00000 0.00000 0.00000 0.00000 0.00000
  -6  11   0   20.59    3.11   2 0.00000 0.00000 0.00000 0.00000 0.00000 0.00000
  -5  11  -3  242.84    6.70  -1 0.00000 0.00000 0.00000 0.00000 0.00000 0.00000
  -6  11  -1  242.84    6.70   2 0.00000 0.00000 0.00000 0.00000 0.00000 0.00000
  -6  11  -2   13.67    1.54   2 0.00000 0.00000 0.00000 0.00000 0.00000 0.00000
  -7  11  -1  275.15    6.73   2 0.00000 0.00000 0.00000 0.00000 0.00000 0.00000
  -8  11   0  158.99    5.33   2 0.00000 0.00000 0.00000 0.00000 0.00000 0.00000
  -9  11   1   81.00    4.39   2 0.00000 0.00000 0.00000 0.00000 0.00000 0.00000
 -10  11   2  208.87    6.37   2 0.00000 0.00000 0.00000 0.00000 0.00000 0.00000
 -11  11   3  211.94    5.10  -1 0.00000 0.00000 0.00000 0.00000 0.00000 0.00000
   5 -11   9  211.94    5.10   2 0.00000 0.00000 0.00000 0.00000 0.00000 0.00000
 -12  11   4   32.86    4.42  -1 0.00000 0.00000 0.00000 0.00000 0.00000 0.00000
   5 -11  10   32.86    4.42   2 0.00000 0.00000 0.00000 0.00000 0.00000 0.00000
   4  10 -11   35.20    2.25   2 0.00000 0.00000 0.00000 0.00000 0.00000 0.00000
   4  10 -11  161.10    9.00  -1 0.00000 0.00000 0.00000 0.00000 0.00000 0.00000
  -6  10   9  161.10    9.00   2 0.00000 0.00000 0.00000 0.00000 0.00000 0.00000
   3  10 -10  252.96    8.97  -1 0.00000 0.00000 0.00000 0.00000 0.00000 0.00000
  -6  10   8  252.96    8.97   2 0.00000 0.00000 0.00000 0.00000 0.00000 0.00000
   2  10  -9   79.75    3.50  -1 0.00000 0.00000 0.00000 0.00000 0.00000 0.00000
  -6  10   7   79.75    3.50   2 0.00000 0.00000 0.00000 0.00000 0.00000 0.00000
   1  10  -8  165.30    5.84  -1 0.00000 0.00000 0.00000 0.00000 0.00000 0.00000
  -6  10   6  165.30    5.84   2 0.00000 0.00000 0.00000 0.00000 0.00000 0.00000
   0  10  -7  130.02    2.70   2 0.00000 0.00000 0.00000 0.00000 0.00000 0.00000
  -1  10  -6   60.26    2.09   2 0.00000 0.00000 0.00000 0.00000 0.00000 0.00000
  -2  10  -5  359.20    4.22   2 0.00000 0.00000 0.00000 0.00000 0.00000 0.00000
  -3  10  -4   -1.73    0.92   2 0.00000 0.00000 0.00000 0.00000 0.00000 0.00000
  -4  10  -3   51.20    2.29   2 0.00000 0.00000 0.00000 0.00000 0.00000 0.00000
  -5  10  -2  345.32    4.93  -1 0.00000 0.00000 0.00000 0.00000 0.00000 0.00000
  -5  10  -2  345.32    4.93   2 0.00000 0.00000 0.00000 0.00000 0.00000 0.00000
  -6  10  -1   12.74    2.47  -1 0.00000 0.00000 0.00000 0.00000 0.00000 0.00000
  -5  10  -3   12.74    2.47   2 0.00000 0.00000 0.00000 0.00000 0.00000 0.00000
  -7  10   0   47.25    2.32   2 0.00000 0.00000 0.00000 0.00000 0.00000 0.00000
  -8  10   1  109.81    3.01   2 0.00000 0.00000 0.00000 0.00000 0.00000 0.00000
  -9  10   2  138.67    5.07   2 0.00000 0.00000 0.00000 0.00000 0.00000 0.00000
 -10  10   3  107.18    4.76   2 0.00000 0.00000 0.00000 0.00000 0.00000 0.00000
 -11  10   4   13.46    2.73   2 0.00000 0.00000 0.00000 0.00000 0.00000 0.00000
 -12  10   5   80.02    6.44  -1 0.00000 0.00000 0.00000 0.00000 0.00000 0.00000
   4 -10  11   80.02    6.44   2 0.00000 0.00000 0.00000 0.00000 0.00000 0.00000
 -13  10   6  427.80   10.60  -1 0.00000 0.00000 0.00000 0.00000 0.00000 0.00000
   4 -10  12  427.80   10.60   2 0.00000 0.00000 0.00000 0.00000 0.00000 0.00000
   6   9 -12   22.35    2.11   2 0.00000 0.00000 0.00000 0.00000 0.00000 0.00000
   5   9 -11   -0.17    1.30   2 0.00000 0.00000 0.00000 0.00000 0.00000 0.00000
   4   9 -10   13.72    1.46   2 0.00000 0.00000 0.00000 0.00000 0.00000 0.00000
   3   9  -9  196.26    3.30   2 0.00000 0.00000 0.00000 0.00000 0.00000 0.00000
   2   9  -8   22.43    3.14  -1 0.00000 0.00000 0.00000 0.00000 0.00000 0.00000
  -5   9   6   22.43    3.14   2 0.00000 0.00000 0.00000 0.00000 0.00000 0.00000
   1   9  -7   80.59    2.71  -1 0.00000 0.00000 0.00000 0.00000 0.00000 0.00000
  -5   9   5   80.59    2.71   2 0.00000 0.00000 0.00000 0.00000 0.00000 0.00000
   0   9  -6  916.54    9.46  -1 0.00000 0.00000 0.00000 0.00000 0.00000 0.00000
  -5   9   4  916.54    9.46   2 0.00000 0.00000 0.00000 0.00000 0.00000 0.00000
  -1   9  -5   33.39    1.74   2 0.00000 0.00000 0.00000 0.00000 0.00000 0.00000
  -2   9  -4  108.12    2.25   2 0.00000 0.00000 0.00000 0.00000 0.00000 0.00000
  -3   9  -3   32.23    1.66   2 0.00000 0.00000 0.00000 0.00000 0.00000 0.00000
  -4   9  -2   76.66    2.39   2 0.00000 0.00000 0.00000 0.00000 0.00000 0.00000
  -5   9  -1  567.29    6.35   2 0.00000 0.00000 0.00000 0.00000 0.00000 0.00000
  -6   9   0   89.68    2.51  -1 0.00000 0.00000 0.00000 0.00000 0.00000 0.00000
  -4   9  -4   89.68    2.51   2 0.00000 0.00000 0.00000 0.00000 0.00000 0.00000
  -7   9   1   95.94    2.49  -1 0.00000 0.00000 0.00000 0.00000 0.00000 0.00000
   4  -9   5   95.94    2.49   2 0.00000 0.00000 0.00000 0.00000 0.00000 0.00000
  -8   9   2   63.65    2.48   2 0.00000 0.00000 0.00000 0.00000 0.00000 0.00000
  -8   9   2  206.52    3.65  -1 0.00000 0.00000 0.00000 0.00000 0.00000 0.00000
   4  -9   6  206.52    3.65   2 0.00000 0.00000 0.00000 0.00000 0.00000 0.00000
  -9   9   3  142.51    3.35   2 0.00000 0.00000 0.00000 0.00000 0.00000 0.00000
 -10   9   4   21.84    2.30   2 0.00000 0.00000 0.00000 0.00000 0.00000 0.00000
 -11   9   5   19.28    2.28   2 0.00000 0.00000 0.00000 0.00000 0.00000 0.00000
 -12   9   6   88.13    3.58   2 0.00000 0.00000 0.00000 0.00000 0.00000 0.00000
   7   8 -12  108.97    7.62  -1 0.00000 0.00000 0.00000 0.00000 0.00000 0.00000
  -5   8  12  108.97    7.62   2 0.00000 0.00000 0.00000 0.00000 0.00000 0.00000
   6   8 -11   51.51    2.63   2 0.00000 0.00000 0.00000 0.00000 0.00000 0.00000
   5   8 -10  114.71    3.11   2 0.00000 0.00000 0.00000 0.00000 0.00000 0.00000
   4   8  -9    6.73    1.24   2 0.00000 0.00000 0.00000 0.00000 0.00000 0.00000
   3   8  -8    4.16    1.10   2 0.00000 0.00000 0.00000 0.00000 0.00000 0.00000
   2   8  -7    2.96    1.00   2 0.00000 0.00000 0.00000 0.00000 0.00000 0.00000
   1   8  -6  295.30    4.40  -1 0.00000 0.00000 0.00000 0.00000 0.00000 0.00000
  -4   8   4  295.30    4.40   2 0.00000 0.00000 0.00000 0.00000 0.00000 0.00000
   0   8  -5  563.84    6.18  -1 0.00000 0.00000 0.00000 0.00000 0.00000 0.00000
  -4   8   3  563.84    6.18   2 0.00000 0.00000 0.00000 0.00000 0.00000 0.00000
  -1   8  -4    0.39    2.83  -1 0.00000 0.00000 0.00000 0.00000 0.00000 0.00000
  -4   8   2    0.39    2.83   2 0.00000 0.00000 0.00000 0.00000 0.00000 0.00000
  -2   8  -3   44.23    1.57   2 0.00000 0.00000 0.00000 0.00000 0.00000 0.00000
  -3   8  -2  249.29    3.56   2 0.00000 0.00000 0.00000 0.00000 0.00000 0.00000
  -4   8  -1   21.64    1.63   2 0.00000 0.00000 0.00000 0.00000 0.00000 0.00000
  -5   8   0  295.51    3.98   2 0.00000 0.00000 0.00000 0.00000 0.00000 0.00000
  -6   8   1   18.58    1.52   2 0.00000 0.00000 0.00000 0.00000 0.00000 0.00000
  -7   8   2  116.78    2.78  -1 0.00000 0.00000 0.00000 0.00000 0.00000 0.00000
   3  -8   6  116.78    2.78   2 0.00000 0.00000 0.00000 0.00000 0.00000 0.00000
  -8   8   3  877.13    7.64  -1 0.00000 0.00000 0.00000 0.00000 0.00000 0.00000
   3  -8   7  877.13    7.64   2 0.00000 0.00000 0.00000 0.00000 0.00000 0.00000
  -9   8   4  273.13    5.04  -1 0.00000 0.00000 0.00000 0.00000 0.00000 0.00000
   3  -8   8  273.13    5.04   2 0.00000 0.00000 0.00000 0.00000 0.00000 0.00000
 -10   8   5   10.48    1.16   2 0.00000 0.00000 0.00000 0.00000 0.00000 0.00000
 -11   8   6   25.80    2.21   2 0.00000 0.00000 0.00000 0.00000 0.00000 0.00000
 -12   8   7  148.15    3.39   2 0.00000 0.00000 0.00000 0.00000 0.00000 0.00000
 -13   8   8   33.95    2.59   2 0.00000 0.00000 0.00000 0.00000 0.00000 0.00000
   8   7 -12   43.61    2.31   2 0.00000 0.00000 0.00000 0.00000 0.00000 0.00000
   8   7 -12   47.70    8.40  -1 0.00000 0.00000 0.00000 0.00000 0.00000 0.00000
  -4   7  12   47.70    8.40   2 0.00000 0.00000 0.00000 0.00000 0.00000 0.00000
   7   7 -11   11.13    3.57  -1 0.00000 0.00000 0.00000 0.00000 0.00000 0.00000
  -4   7  11   11.13    3.57   2 0.00000 0.00000 0.00000 0.00000 0.00000 0.00000
   6   7 -10  221.69    5.33  -1 0.00000 0.00000 0.00000 0.00000 0.00000 0.00000
  -4   7  10  221.69    5.33   2 0.00000 0.00000 0.00000 0.00000 0.00000 0.00000
   5   7  -9  418.20   11.34  -1 0.00000 0.00000 0.00000 0.00000 0.00000 0.00000
  -4   7   9  418.20   11.34   2 0.00000 0.00000 0.00000 0.00000 0.00000 0.00000
   4   7  -8   58.37    1.95   2 0.00000 0.00000 0.00000 0.00000 0.00000 0.00000
   3   7  -7   23.30    1.52   2 0.00000 0.00000 0.00000 0.00000 0.00000 0.00000
   2   7  -6  258.06    2.75   2 0.00000 0.00000 0.00000 0.00000 0.00000 0.00000
   1   7  -5   26.31    1.20   2 0.00000 0.00000 0.00000 0.00000 0.00000 0.00000
   0   7  -4  424.30    3.36   2 0.00000 0.00000 0.00000 0.00000 0.00000 0.00000
  -1   7  -3  233.84    2.88  -1 0.00000 0.00000 0.00000 0.00000 0.00000 0.00000
  -3   7   1  233.84    2.88   2 0.00000 0.00000 0.00000 0.00000 0.00000 0.00000
  -2   7  -2  157.95    2.58  -1 0.00000 0.00000 0.00000 0.00000 0.00000 0.00000
  -3   7   0  157.95    2.58   2 0.00000 0.00000 0.00000 0.00000 0.00000 0.00000
  -3   7  -1  620.63    6.20   2 0.00000 0.00000 0.00000 0.00000 0.00000 0.00000
  -4   7   0    1.62    0.75   2 0.00000 0.00000 0.00000 0.00000 0.00000 0.00000
  -5   7   1   42.93    1.23   2 0.00000 0.00000 0.00000 0.00000 0.00000 0.00000
  -6   7   2  143.20    2.67   2 0.00000 0.00000 0.00000 0.00000 0.00000 0.00000
  -7   7   3   54.30    2.08   2 0.00000 0.00000 0.00000 0.00000 0.00000 0.00000
  -8   7   4  214.20    3.03   2 0.00000 0.00000 0.00000 0.00000 0.00000 0.00000
  -8   7   4  236.95    6.31  -1 0.00000 0.00000 0.00000 0.00000 0.00000 0.00000
   2  -7   8  236.95    6.31   2 0.00000 0.00000 0.00000 0.00000 0.00000 0.00000
  -9   7   5  560.64    7.17  -1 0.00000 0.00000 0.00000 0.00000 0.00000 0.00000
   2  -7   9  560.64    7.17   2 0.00000 0.00000 0.00000 0.00000 0.00000 0.00000
 -10   7   6  263.34    5.09  -1 0.00000 0.00000 0.00000 0.00000 0.00000 0.00000
   2  -7  10  263.34    5.09   2 0.00000 0.00000 0.00000 0.00000 0.00000 0.00000
 -12   7   8  140.98    3.38   2 0.00000 0.00000 0.00000 0.00000 0.00000 0.00000
 -13   7   9    8.12    1.78   2 0.00000 0.00000 0.00000 0.00000 0.00000 0.00000
   9   6 -12  108.56    2.87   2 0.00000 0.00000 0.00000 0.00000 0.00000 0.00000
   8   6 -11    7.83    1.31   2 0.00000 0.00000 0.00000 0.00000 0.00000 0.00000
   7   6 -10    8.70    1.25   2 0.00000 0.00000 0.00000 0.00000 0.00000 0.00000
   6   6  -9  331.34    6.26  -1 0.00000 0.00000 0.00000 0.00000 0.00000 0.00000
  -3   6   9  331.34    6.26   2 0.00000 0.00000 0.00000 0.00000 0.00000 0.00000
   5   6  -8  212.13    4.58  -1 0.00000 0.00000 0.00000 0.00000 0.00000 0.00000
  -3   6   8  212.13    4.58   2 0.00000 0.00000 0.00000 0.00000 0.00000 0.00000
   4   6  -7    6.57    3.02  -1 0.00000 0.00000 0.00000 0.00000 0.00000 0.00000
  -3   6   7    6.57    3.02   2 0.00000 0.00000 0.00000 0.00000 0.00000 0.00000
   3   6  -6  249.33    2.56   2 0.00000 0.00000 0.00000 0.00000 0.00000 0.00000
   2   6  -5  799.53    5.45   2 0.00000 0.00000 0.00000 0.00000 0.00000 0.00000
   1   6  -4    0.57    0.42   2 0.00000 0.00000 0.00000 0.00000 0.00000 0.00000
   0   6  -3  227.89    2.10   2 0.00000 0.00000 0.00000 0.00000 0.00000 0.00000
  -1   6  -2  240.61    2.59   2 0.00000 0.00000 0.00000 0.00000 0.00000 0.00000
  -2   6  -1  128.04    2.19   2 0.00000 0.00000 0.00000 0.00000 0.00000 0.00000
  -3   6   0 3412.67   22.61  -1 0.00000 0.00000 0.00000 0.00000 0.00000 0.00000
  -2   6  -2 3412.67   22.61   2 0.00000 0.00000 0.00000 0.00000 0.00000 0.00000
  -4   6   1  365.67    4.09   2 0.00000 0.00000 0.00000 0.00000 0.00000 0.00000
  -5   6   2  161.24    2.57   2 0.00000 0.00000 0.00000 0.00000 0.00000 0.00000
  -6   6   3  261.64    3.58   2 0.00000 0.00000 0.00000 0.00000 0.00000 0.00000
  -7   6   4   35.32    1.89   2 0.00000 0.00000 0.00000 0.00000 0.00000 0.00000
  -8   6   5    9.93    1.45   2 0.00000 0.00000 0.00000 0.00000 0.00000 0.00000
  -9   6   6   32.62    2.51   2 0.00000 0.00000 0.00000 0.00000 0.00000 0.00000
 -10   6   7  500.24    5.79  -1 0.00000 0.00000 0.00000 0.00000 0.00000 0.00000
   1  -6  11  500.24    5.79   2 0.00000 0.00000 0.00000 0.00000 0.00000 0.00000
 -11   6   8   86.67    3.66  -1 0.00000 0.00000 0.00000 0.00000 0.00000 0.00000
   1  -6  12   86.67    3.66   2 0.00000 0.00000 0.00000 0.00000 0.00000 0.00000
 -12   6   9  217.06    5.78  -1 0.00000 0.00000 0.00000 0.00000 0.00000 0.00000
   1  -6  13  217.06    5.78   2 0.00000 0.00000 0.00000 0.00000 0.00000 0.00000
 -13   6  10   20.02    2.11   2 0.00000 0.00000 0.00000 0.00000 0.00000 0.00000
   9   5 -11   78.08    2.46   2 0.00000 0.00000 0.00000 0.00000 0.00000 0.00000
   8   5 -10   22.41    1.85   2 0.00000 0.00000 0.00000 0.00000 0.00000 0.00000
   7   5  -9   98.27    2.36   2 0.00000 0.00000 0.00000 0.00000 0.00000 0.00000
   6   5  -8  172.41    2.78   2 0.00000 0.00000 0.00000 0.00000 0.00000 0.00000
   5   5  -7   85.65    6.18  -1 0.00000 0.00000 0.00000 0.00000 0.00000 0.00000
  -2   5   7   85.65    6.18   2 0.00000 0.00000 0.00000 0.00000 0.00000 0.00000
   4   5  -6  410.23    5.87  -1 0.00000 0.00000 0.00000 0.00000 0.00000 0.00000
  -2   5   6  410.23    5.87   2 0.00000 0.00000 0.00000 0.00000 0.00000 0.00000
   3   5  -5   44.36    2.57  -1 0.00000 0.00000 0.00000 0.00000 0.00000 0.00000
  -2   5   5   44.36    2.57   2 0.00000 0.00000 0.00000 0.00000 0.00000 0.00000
   2   5  -4  657.24    4.50   2 0.00000 0.00000 0.00000 0.00000 0.00000 0.00000
   1   5  -3   12.62    0.99   2 0.00000 0.00000 0.00000 0.00000 0.00000 0.00000
   0   5  -2  263.78    2.18   2 0.00000 0.00000 0.00000 0.00000 0.00000 0.00000
  -1   5  -1 1215.75    8.44   2 0.00000 0.00000 0.00000 0.00000 0.00000 0.00000
  -2   5   0   31.09    1.26   2 0.00000 0.00000 0.00000 0.00000 0.00000 0.00000
  -3   5   1  263.31    3.02   2 0.00000 0.00000 0.00000 0.00000 0.00000 0.00000
  -4   5   2 2319.42   15.79  -1 0.00000 0.00000 0.00000 0.00000 0.00000 0.00000
   1  -5   4 2319.42   15.79   2 0.00000 0.00000 0.00000 0.00000 0.00000 0.00000
  -5   5   3   89.33    1.86  -1 0.00000 0.00000 0.00000 0.00000 0.00000 0.00000
   1  -5   5   89.33    1.86   2 0.00000 0.00000 0.00000 0.00000 0.00000 0.00000
  -5   5   3   83.55    1.96   2 0.00000 0.00000 0.00000 0.00000 0.00000 0.00000
  -6   5   4  537.23    5.74   2 0.00000 0.00000 0.00000 0.00000 0.00000 0.00000
  -7   5   5  127.71    2.87   2 0.00000 0.00000 0.00000 0.00000 0.00000 0.00000
  -8   5   6   12.62    1.54   2 0.00000 0.00000 0.00000 0.00000 0.00000 0.00000
  -9   5   7    9.50    1.64   2 0.00000 0.00000 0.00000 0.00000 0.00000 0.00000
 -10   5   8  136.94    3.68   2 0.00000 0.00000 0.00000 0.00000 0.00000 0.00000
 -11   5   9   16.90    3.79  -1 0.00000 0.00000 0.00000 0.00000 0.00000 0.00000
   0  -5  13   16.90    3.79   2 0.00000 0.00000 0.00000 0.00000 0.00000 0.00000
 -12   5  10   78.69    3.67  -1 0.00000 0.00000 0.00000 0.00000 0.00000 0.00000
   0  -5  14   78.69    3.67   2 0.00000 0.00000 0.00000 0.00000 0.00000 0.00000
 -13   5  11  340.00    7.09  -1 0.00000 0.00000 0.00000 0.00000 0.00000 0.00000
   0  -5  15  340.00    7.09   2 0.00000 0.00000 0.00000 0.00000 0.00000 0.00000
  10   4 -11   97.13    4.58  -1 0.00000 0.00000 0.00000 0.00000 0.00000 0.00000
  -2   4  13   97.13    4.58   2 0.00000 0.00000 0.00000 0.00000 0.00000 0.00000
   9   4 -10   27.66    5.90  -1 0.00000 0.00000 0.00000 0.00000 0.00000 0.00000
  -2   4  12   27.66    5.90   2 0.00000 0.00000 0.00000 0.00000 0.00000 0.00000
   8   4  -9  166.29    2.90   2 0.00000 0.00000 0.00000 0.00000 0.00000 0.00000
   7   4  -8  116.92    2.40   2 0.00000 0.00000 0.00000 0.00000 0.00000 0.00000
   6   4  -7   12.53    1.03   2 0.00000 0.00000 0.00000 0.00000 0.00000 0.00000
   5   4  -6    1.99    0.74   2 0.00000 0.00000 0.00000 0.00000 0.00000 0.00000
   4   4  -5  341.71    2.96   2 0.00000 0.00000 0.00000 0.00000 0.00000 0.00000
   3   4  -4  288.88    4.32  -1 0.00000 0.00000 0.00000 0.00000 0.00000 0.00000
  -1   4   4  288.88    4.32   2 0.00000 0.00000 0.00000 0.00000 0.00000 0.00000
   2   4  -3  397.97    4.99  -1 0.00000 0.00000 0.00000 0.00000 0.00000 0.00000
  -1   4   3  397.97    4.99   2 0.00000 0.00000 0.00000 0.00000 0.00000 0.00000
   1   4  -2  217.12    2.12   2 0.00000 0.00000 0.00000 0.00000 0.00000 0.00000
   0   4  -1   53.89    1.04   2 0.00000 0.00000 0.00000 0.00000 0.00000 0.00000
  -1   4   0  902.56    7.58   2 0.00000 0.00000 0.00000 0.00000 0.00000 0.00000
  -2   4   1  111.62    1.55   2 0.00000 0.00000 0.00000 0.00000 0.00000 0.00000
  -3   4   2    0.17    0.53   2 0.00000 0.00000 0.00000 0.00000 0.00000 0.00000
  -4   4   3  916.44    8.15   2 0.00000 0.00000 0.00000 0.00000 0.00000 0.00000
  -5   4   4   71.72    1.91  -1 0.00000 0.00000 0.00000 0.00000 0.00000 0.00000
   0  -4   6   71.72    1.91   2 0.00000 0.00000 0.00000 0.00000 0.00000 0.00000
  -6   4   5  279.51    3.41  -1 0.00000 0.00000 0.00000 0.00000 0.00000 0.00000
   0  -4   7  279.51    3.41   2 0.00000 0.00000 0.00000 0.00000 0.00000 0.00000
  -7   4   6   17.08    1.95   2 0.00000 0.00000 0.00000 0.00000 0.00000 0.00000
  -8   4   7  155.28    3.41   2 0.00000 0.00000 0.00000 0.00000 0.00000 0.00000
  -9   4   8  220.44    4.21   2 0.00000 0.00000 0.00000 0.00000 0.00000 0.00000
 -10   4   9   73.75    3.19   2 0.00000 0.00000 0.00000 0.00000 0.00000 0.00000
 -11   4  10   26.31    2.85   2 0.00000 0.00000 0.00000 0.00000 0.00000 0.00000
  11   3 -11   41.54    2.20   2 0.00000 0.00000 0.00000 0.00000 0.00000 0.00000
  10   3 -10  113.81    6.55  -1 0.00000 0.00000 0.00000 0.00000 0.00000 0.00000
  -1   3  12  113.81    6.55   2 0.00000 0.00000 0.00000 0.00000 0.00000 0.00000
   9   3  -9  180.76    4.98  -1 0.00000 0.00000 0.00000 0.00000 0.00000 0.00000
  -1   3  11  180.76    4.98   2 0.00000 0.00000 0.00000 0.00000 0.00000 0.00000
   8   3  -8  329.32    6.46  -1 0.00000 0.00000 0.00000 0.00000 0.00000 0.00000
  -1   3  10  329.32    6.46   2 0.00000 0.00000 0.00000 0.00000 0.00000 0.00000
   7   3  -7  136.29    2.41   2 0.00000 0.00000 0.00000 0.00000 0.00000 0.00000
   6   3  -6  119.32    2.11   2 0.00000 0.00000 0.00000 0.00000 0.00000 0.00000
   5   3  -5    1.48    0.54   2 0.00000 0.00000 0.00000 0.00000 0.00000 0.00000
   4   3  -4  916.14    6.09   2 0.00000 0.00000 0.00000 0.00000 0.00000 0.00000
   3   3  -3  214.60    1.97   2 0.00000 0.00000 0.00000 0.00000 0.00000 0.00000
   2   3  -2  128.87    4.40  -1 0.00000 0.00000 0.00000 0.00000 0.00000 0.00000
   0   3   2  128.87    4.40   2 0.00000 0.00000 0.00000 0.00000 0.00000 0.00000
   1   3  -1 1950.50   17.95  -1 0.00000 0.00000 0.00000 0.00000 0.00000 0.00000
   0   3   1 1950.50   17.95   2 0.00000 0.00000 0.00000 0.00000 0.00000 0.00000
   0   3   0   12.27    1.18   2 0.00000 0.00000 0.00000 0.00000 0.00000 0.00000
  -1   3   1  245.05    3.58   2 0.00000 0.00000 0.00000 0.00000 0.00000 0.00000
  -2   3   2  507.84    6.61   2 0.00000 0.00000 0.00000 0.00000 0.00000 0.00000
  -3   3   3   25.96    1.90   2 0.00000 0.00000 0.00000 0.00000 0.00000 0.00000
  -4   3   4  397.06    6.13   2 0.00000 0.00000 0.00000 0.00000 0.00000 0.00000
  -5   3   5  138.04    2.64   2 0.00000 0.00000 0.00000 0.00000 0.00000 0.00000
  -6   3   6  104.29    2.41  -1 0.00000 0.00000 0.00000 0.00000 0.00000 0.00000
  -1  -3   8  104.29    2.41   2 0.00000 0.00000 0.00000 0.00000 0.00000 0.00000
  -7   3   7  433.58    4.65  -1 0.00000 0.00000 0.00000 0.00000 0.00000 0.00000
  -1  -3   9  433.58    4.65   2 0.00000 0.00000 0.00000 0.00000 0.00000 0.00000
  -8   3   8  510.53    7.04  -1 0.00000 0.00000 0.00000 0.00000 0.00000 0.00000
  -1  -3  10  510.53    7.04   2 0.00000 0.00000 0.00000 0.00000 0.00000 0.00000
  -9   3   9   52.05    2.85   2 0.00000 0.00000 0.00000 0.00000 0.00000 0.00000
 -10   3  10    7.58    1.83   2 0.00000 0.00000 0.00000 0.00000 0.00000 0.00000
 -11   3  11   78.00    4.88   2 0.00000 0.00000 0.00000 0.00000 0.00000 0.00000
 -12   3  12   28.71    4.47   2 0.00000 0.00000 0.00000 0.00000 0.00000 0.00000
  11   2 -10    1.78    1.19   2 0.00000 0.00000 0.00000 0.00000 0.00000 0.00000
  10   2  -9   46.96    2.04   2 0.00000 0.00000 0.00000 0.00000 0.00000 0.00000
   9   2  -8  100.31    2.32   2 0.00000 0.00000 0.00000 0.00000 0.00000 0.00000
   8   2  -7  310.93    4.33  -1 0.00000 0.00000 0.00000 0.00000 0.00000 0.00000
   0   2   9  310.93    4.33   2 0.00000 0.00000 0.00000 0.00000 0.00000 0.00000
   7   2  -6  247.14    3.68  -1 0.00000 0.00000 0.00000 0.00000 0.00000 0.00000
   0   2   8  247.14    3.68   2 0.00000 0.00000 0.00000 0.00000 0.00000 0.00000
   6   2  -5  338.65    5.03  -1 0.00000 0.00000 0.00000 0.00000 0.00000 0.00000
   0   2   7  338.65    5.03   2 0.00000 0.00000 0.00000 0.00000 0.00000 0.00000
   6   2  -5  245.18    2.79   2 0.00000 0.00000 0.00000 0.00000 0.00000 0.00000
   5   2  -4  173.69    1.69   2 0.00000 0.00000 0.00000 0.00000 0.00000 0.00000
   4   2  -3  571.19    3.54   2 0.00000 0.00000 0.00000 0.00000 0.00000 0.00000
   3   2  -2   81.91    0.97   2 0.00000 0.00000 0.00000 0.00000 0.00000 0.00000
   2   2  -1    4.73    0.67   2 0.00000 0.00000 0.00000 0.00000 0.00000 0.00000
   1   2   0 7322.32   98.17  -1 0.00000 0.00000 0.00000 0.00000 0.00000 0.00000
   1   2   0 7322.32   98.17   2 0.00000 0.00000 0.00000 0.00000 0.00000 0.00000
  -2   2   3  387.57    5.35   2 0.00000 0.00000 0.00000 0.00000 0.00000 0.00000
  -3   2   4  354.49    3.89   2 0.00000 0.00000 0.00000 0.00000 0.00000 0.00000
  -4   2   5  377.70    4.34   2 0.00000 0.00000 0.00000 0.00000 0.00000 0.00000
  -5   2   6    1.31    0.93   2 0.00000 0.00000 0.00000 0.00000 0.00000 0.00000
  -6   2   7    0.46    0.69   2 0.00000 0.00000 0.00000 0.00000 0.00000 0.00000
  -7   2   8  595.87    7.64  -1 0.00000 0.00000 0.00000 0.00000 0.00000 0.00000
  -2  -2  10  595.87    7.64   2 0.00000 0.00000 0.00000 0.00000 0.00000 0.00000
  -8   2   9  378.78    5.84  -1 0.00000 0.00000 0.00000 0.00000 0.00000 0.00000
  -2  -2  11  378.78    5.84   2 0.00000 0.00000 0.00000 0.00000 0.00000 0.00000
  -9   2  10    4.11    3.02  -1 0.00000 0.00000 0.00000 0.00000 0.00000 0.00000
  -2  -2  12    4.11    3.02   2 0.00000 0.00000 0.00000 0.00000 0.00000 0.00000
 -10   2  11   13.59    2.79   2 0.00000 0.00000 0.00000 0.00000 0.00000 0.00000
 -11   2  12  226.86    7.05   2 0.00000 0.00000 0.00000 0.00000 0.00000 0.00000
 -12   2  13   21.69    3.54   2 0.00000 0.00000 0.00000 0.00000 0.00000 0.00000
  12   1 -10   29.82    2.03   2 0.00000 0.00000 0.00000 0.00000 0.00000 0.00000
  11   1  -9   75.17    2.29   2 0.00000 0.00000 0.00000 0.00000 0.00000 0.00000
  10   1  -8   49.48    2.54   2 0.00000 0.00000 0.00000 0.00000 0.00000 0.00000
   9   1  -7  102.24    2.87   2 0.00000 0.00000 0.00000 0.00000 0.00000 0.00000
   8   1  -6   98.06    2.64   2 0.00000 0.00000 0.00000 0.00000 0.00000 0.00000
   7   1  -5  278.71    3.90  -1 0.00000 0.00000 0.00000 0.00000 0.00000 0.00000
   1   1   7  278.71    3.90   2 0.00000 0.00000 0.00000 0.00000 0.00000 0.00000
   6   1  -4 1151.42    9.48  -1 0.00000 0.00000 0.00000 0.00000 0.00000 0.00000
   1   1   6 1151.42    9.48   2 0.00000 0.00000 0.00000 0.00000 0.00000 0.00000
   5   1  -3  784.64   13.61  -1 0.00000 0.00000 0.00000 0.00000 0.00000 0.00000
   1   1   5  784.64   13.61   2 0.00000 0.00000 0.00000 0.00000 0.00000 0.00000
   4   1  -2  325.53    1.83   2 0.00000 0.00000 0.00000 0.00000 0.00000 0.00000
   3   1  -1  525.20    4.47   2 0.00000 0.00000 0.00000 0.00000 0.00000 0.00000
   2   1   0    8.22    0.63   2 0.00000 0.00000 0.00000 0.00000 0.00000 0.00000
   1   1   1  179.09    1.88   2 0.00000 0.00000 0.00000 0.00000 0.00000 0.00000
   0   1   2  152.68    1.69   2 0.00000 0.00000 0.00000 0.00000 0.00000 0.00000
  -1   1   3 1481.98   17.39  -1 0.00000 0.00000 0.00000 0.00000 0.00000 0.00000
  -2  -1   3 1481.98   17.39   2 0.00000 0.00000 0.00000 0.00000 0.00000 0.00000
  -2   1   4 9999.99   80.89  -1 0.00000 0.00000 0.00000 0.00000 0.00000 0.00000
  -2  -1   4 9999.99   80.89   2 0.00000 0.00000 0.00000 0.00000 0.00000 0.00000
  -3   1   5 1543.58   18.68  -1 0.00000 0.00000 0.00000 0.00000 0.00000 0.00000
  -2  -1   5 1543.58   18.68   2 0.00000 0.00000 0.00000 0.00000 0.00000 0.00000
  -4   1   6    2.04    0.71   2 0.00000 0.00000 0.00000 0.00000 0.00000 0.00000
  -5   1   7   81.31    3.51   2 0.00000 0.00000 0.00000 0.00000 0.00000 0.00000
  -6   1   8  219.98    5.53   2 0.00000 0.00000 0.00000 0.00000 0.00000 0.00000
  -7   1   9  121.58    4.61   2 0.00000 0.00000 0.00000 0.00000 0.00000 0.00000
  -9   1  11  105.95    3.91  -1 0.00000 0.00000 0.00000 0.00000 0.00000 0.00000
  -3  -1  13  105.95    3.91   2 0.00000 0.00000 0.00000 0.00000 0.00000 0.00000
 -10   1  12   75.89    3.88  -1 0.00000 0.00000 0.00000 0.00000 0.00000 0.00000
  -3  -1  14   75.89    3.88   2 0.00000 0.00000 0.00000 0.00000 0.00000 0.00000
 -11   1  13  301.49    9.21  -1 0.00000 0.00000 0.00000 0.00000 0.00000 0.00000
  -3  -1  15  301.49    9.21   2 0.00000 0.00000 0.00000 0.00000 0.00000 0.00000
  12   0  -9  234.47    8.48  -1 0.00000 0.00000 0.00000 0.00000 0.00000 0.00000
   1   0  13  234.47    8.48   2 0.00000 0.00000 0.00000 0.00000 0.00000 0.00000
  11   0  -8  193.98    4.02   2 0.00000 0.00000 0.00000 0.00000 0.00000 0.00000
  10   0  -7  184.18    3.74   2 0.00000 0.00000 0.00000 0.00000 0.00000 0.00000
   9   0  -6   65.91    2.50   2 0.00000 0.00000 0.00000 0.00000 0.00000 0.00000
   8   0  -5   72.99    2.35   2 0.00000 0.00000 0.00000 0.00000 0.00000 0.00000
   7   0  -4  103.83    1.92   2 0.00000 0.00000 0.00000 0.00000 0.00000 0.00000
   6   0  -3 2299.35   27.74  -1 0.00000 0.00000 0.00000 0.00000 0.00000 0.00000
   2   0   5 2299.35   27.74   2 0.00000 0.00000 0.00000 0.00000 0.00000 0.00000
   5   0  -2  223.43    3.52  -1 0.00000 0.00000 0.00000 0.00000 0.00000 0.00000
   2   0   4  223.43    3.52   2 0.00000 0.00000 0.00000 0.00000 0.00000 0.00000
   4   0  -1  131.70    1.56   2 0.00000 0.00000 0.00000 0.00000 0.00000 0.00000
   3   0   0  227.88    2.47   2 0.00000 0.00000 0.00000 0.00000 0.00000 0.00000
   2   0   1    2.86    0.68   2 0.00000 0.00000 0.00000 0.00000 0.00000 0.00000
   1   0   2   39.23    1.18   2 0.00000 0.00000 0.00000 0.00000 0.00000 0.00000
   0   0   3  146.19    1.47   2 0.00000 0.00000 0.00000 0.00000 0.00000 0.00000
  -1   0   4 2170.95   13.14   2 0.00000 0.00000 0.00000 0.00000 0.00000 0.00000
  -2   0   5 3908.37   34.21  -1 0.00000 0.00000 0.00000 0.00000 0.00000 0.00000
  -3   0   5 3908.37   34.21   2 0.00000 0.00000 0.00000 0.00000 0.00000 0.00000
  -3   0   6   29.61    2.01  -1 0.00000 0.00000 0.00000 0.00000 0.00000 0.00000
  -3   0   6   29.61    2.01   2 0.00000 0.00000 0.00000 0.00000 0.00000 0.00000
  -4   0   7   57.84    2.74  -1 0.00000 0.00000 0.00000 0.00000 0.00000 0.00000
  -3   0   7   57.84    2.74   2 0.00000 0.00000 0.00000 0.00000 0.00000 0.00000
  -5   0   8  325.76    4.72   2 0.00000 0.00000 0.00000 0.00000 0.00000 0.00000
  -6   0   9  334.82    5.13   2 0.00000 0.00000 0.00000 0.00000 0.00000 0.00000
  -7   0  10   11.07    1.88   2 0.00000 0.00000 0.00000 0.00000 0.00000 0.00000
  -8   0  11   -2.12    1.71   2 0.00000 0.00000 0.00000 0.00000 0.00000 0.00000
  -9   0  12  288.02    5.54   2 0.00000 0.00000 0.00000 0.00000 0.00000 0.00000
 -10   0  13    5.15    3.53  -1 0.00000 0.00000 0.00000 0.00000 0.00000 0.00000
  -4   0  15    5.15    3.53   2 0.00000 0.00000 0.00000 0.00000 0.00000 0.00000
 -11   0  14   88.46    6.52  -1 0.00000 0.00000 0.00000 0.00000 0.00000 0.00000
  -4   0  16   88.46    6.52   2 0.00000 0.00000 0.00000 0.00000 0.00000 0.00000
  13  -1  -9    3.75    1.66   2 0.00000 0.00000 0.00000 0.00000 0.00000 0.00000
  12  -1  -8  129.79    5.73  -1 0.00000 0.00000 0.00000 0.00000 0.00000 0.00000
   2  -1  12  129.79    5.73   2 0.00000 0.00000 0.00000 0.00000 0.00000 0.00000
  11  -1  -7  484.53    9.69  -1 0.00000 0.00000 0.00000 0.00000 0.00000 0.00000
   2  -1  11  484.53    9.69   2 0.00000 0.00000 0.00000 0.00000 0.00000 0.00000
  10  -1  -6  410.41    6.67  -1 0.00000 0.00000 0.00000 0.00000 0.00000 0.00000
   2  -1  10  410.41    6.67   2 0.00000 0.00000 0.00000 0.00000 0.00000 0.00000
   9  -1  -5   70.22    2.41   2 0.00000 0.00000 0.00000 0.00000 0.00000 0.00000
   8  -1  -4  448.91    4.53   2 0.00000 0.00000 0.00000 0.00000 0.00000 0.00000
   7  -1  -3  207.51    2.28   2 0.00000 0.00000 0.00000 0.00000 0.00000 0.00000
   6  -1  -2  560.96    3.56   2 0.00000 0.00000 0.00000 0.00000 0.00000 0.00000
   5  -1  -1  179.79    1.33   2 0.00000 0.00000 0.00000 0.00000 0.00000 0.00000
   4  -1   0   88.49    3.26  -1 0.00000 0.00000 0.00000 0.00000 0.00000 0.00000
   3  -1   2   88.49    3.26   2 0.00000 0.00000 0.00000 0.00000 0.00000 0.00000
   3  -1   1 1341.42   11.74   2 0.00000 0.00000 0.00000 0.00000 0.00000 0.00000
   2  -1   2   65.70    2.31   2 0.00000 0.00000 0.00000 0.00000 0.00000 0.00000
   1  -1   3  159.16    1.77   2 0.00000 0.00000 0.00000 0.00000 0.00000 0.00000
   0  -1   4   42.28    1.26   2 0.00000 0.00000 0.00000 0.00000 0.00000 0.00000
  -1  -1   5 1510.41   10.72   2 0.00000 0.00000 0.00000 0.00000 0.00000 0.00000
  -2  -1   6   83.83    1.91   2 0.00000 0.00000 0.00000 0.00000 0.00000 0.00000
  -3  -1   7  288.63    3.98  -1 0.00000 0.00000 0.00000 0.00000 0.00000 0.00000
  -4   1   7  288.63    3.98   2 0.00000 0.00000 0.00000 0.00000 0.00000 0.00000
  -4  -1   8 1299.00   10.40  -1 0.00000 0.00000 0.00000 0.00000 0.00000 0.00000
  -4   1   8 1299.00   10.40   2 0.00000 0.00000 0.00000 0.00000 0.00000 0.00000
  -5  -1   9 1061.61    7.77  -1 0.00000 0.00000 0.00000 0.00000 0.00000 0.00000
  -4   1   9 1061.61    7.77   2 0.00000 0.00000 0.00000 0.00000 0.00000 0.00000
  -6  -1  10   97.73    3.18   2 0.00000 0.00000 0.00000 0.00000 0.00000 0.00000
  -7  -1  11   11.33    1.94   2 0.00000 0.00000 0.00000 0.00000 0.00000 0.00000
  -8  -1  12   40.95    3.10   2 0.00000 0.00000 0.00000 0.00000 0.00000 0.00000
  -9  -1  13  237.69    5.25   2 0.00000 0.00000 0.00000 0.00000 0.00000 0.00000
 -10  -1  14    0.05    2.20   2 0.00000 0.00000 0.00000 0.00000 0.00000 0.00000
  13  -2  -8   20.18    2.30   2 0.00000 0.00000 0.00000 0.00000 0.00000 0.00000
  12  -2  -7   38.82    2.57   2 0.00000 0.00000 0.00000 0.00000 0.00000 0.00000
  11  -2  -6  159.42    6.08  -1 0.00000 0.00000 0.00000 0.00000 0.00000 0.00000
   3  -2  10  159.42    6.08   2 0.00000 0.00000 0.00000 0.00000 0.00000 0.00000
  10  -2  -5   14.63    2.36  -1 0.00000 0.00000 0.00000 0.00000 0.00000 0.00000
   3  -2   9   14.63    2.36   2 0.00000 0.00000 0.00000 0.00000 0.00000 0.00000
   9  -2  -4    5.23    3.88  -1 0.00000 0.00000 0.00000 0.00000 0.00000 0.00000
   3  -2   8    5.23    3.88   2 0.00000 0.00000 0.00000 0.00000 0.00000 0.00000
   8  -2  -3  401.20    4.18   2 0.00000 0.00000 0.00000 0.00000 0.00000 0.00000
   7  -2  -2  208.04    1.94   2 0.00000 0.00000 0.00000 0.00000 0.00000 0.00000
   6  -2  -1  338.70    2.45   2 0.00000 0.00000 0.00000 0.00000 0.00000 0.00000
   5  -2   0  338.75    2.33   2 0.00000 0.00000 0.00000 0.00000 0.00000 0.00000
   4  -2   1    2.72    0.33   2 0.00000 0.00000 0.00000 0.00000 0.00000 0.00000
   3  -2   2  827.68    5.88   2 0.00000 0.00000 0.00000 0.00000 0.00000 0.00000
   2  -2   3   59.17    1.37  -1 0.00000 0.00000 0.00000 0.00000 0.00000 0.00000
   4  -2  -1   59.17    1.37   2 0.00000 0.00000 0.00000 0.00000 0.00000 0.00000
   1  -2   4  220.87    2.00   2 0.00000 0.00000 0.00000 0.00000 0.00000 0.00000
   0  -2   5 1189.32    8.72   2 0.00000 0.00000 0.00000 0.00000 0.00000 0.00000
  -1  -2   6   15.07    1.19   2 0.00000 0.00000 0.00000 0.00000 0.00000 0.00000
  -2  -2   7  122.94    2.18   2 0.00000 0.00000 0.00000 0.00000 0.00000 0.00000
  -3  -2   8  112.86    2.76   2 0.00000 0.00000 0.00000 0.00000 0.00000 0.00000
  -4  -2   9  541.89    6.59   2 0.00000 0.00000 0.00000 0.00000 0.00000 0.00000
  -5  -2  10  203.26    4.45  -1 0.00000 0.00000 0.00000 0.00000 0.00000 0.00000
  -5   2  10  203.26    4.45   2 0.00000 0.00000 0.00000 0.00000 0.00000 0.00000
  -6  -2  11  151.93    4.01  -1 0.00000 0.00000 0.00000 0.00000 0.00000 0.00000
  -5   2  11  151.93    4.01   2 0.00000 0.00000 0.00000 0.00000 0.00000 0.00000
  -7  -2  12  325.17    8.00  -1 0.00000 0.00000 0.00000 0.00000 0.00000 0.00000
  -5   2  12  325.17    8.00   2 0.00000 0.00000 0.00000 0.00000 0.00000 0.00000
  -8  -2  13  151.27    4.41   2 0.00000 0.00000 0.00000 0.00000 0.00000 0.00000
  -9  -2  14  107.32    4.10   2 0.00000 0.00000 0.00000 0.00000 0.00000 0.00000
  13  -3  -7   72.97    3.02   2 0.00000 0.00000 0.00000 0.00000 0.00000 0.00000
  12  -3  -6  100.88    3.13   2 0.00000 0.00000 0.00000 0.00000 0.00000 0.00000
  11  -3  -5    4.08    1.38   2 0.00000 0.00000 0.00000 0.00000 0.00000 0.00000
  10  -3  -4  125.37    5.71  -1 0.00000 0.00000 0.00000 0.00000 0.00000 0.00000
   4  -3   8  125.37    5.71   2 0.00000 0.00000 0.00000 0.00000 0.00000 0.00000
   9  -3  -3   14.15    3.16  -1 0.00000 0.00000 0.00000 0.00000 0.00000 0.00000
   4  -3   7   14.15    3.16   2 0.00000 0.00000 0.00000 0.00000 0.00000 0.00000
   8  -3  -2 1257.36   17.45  -1 0.00000 0.00000 0.00000 0.00000 0.00000 0.00000
   4  -3   6 1257.36   17.45   2 0.00000 0.00000 0.00000 0.00000 0.00000 0.00000
   7  -3  -1   24.72    0.97   2 0.00000 0.00000 0.00000 0.00000 0.00000 0.00000
   6  -3   0   34.63    0.92   2 0.00000 0.00000 0.00000 0.00000 0.00000 0.00000
   5  -3   1  299.84    2.53   2 0.00000 0.00000 0.00000 0.00000 0.00000 0.00000
   4  -3   2  115.62    1.65   2 0.00000 0.00000 0.00000 0.00000 0.00000 0.00000
   3  -3   3  100.97    1.37   2 0.00000 0.00000 0.00000 0.00000 0.00000 0.00000
   2  -3   4    4.08    0.58   2 0.00000 0.00000 0.00000 0.00000 0.00000 0.00000
   1  -3   5  552.20    5.66  -1 0.00000 0.00000 0.00000 0.00000 0.00000 0.00000
  -5   3   3  552.20    5.66   2 0.00000 0.00000 0.00000 0.00000 0.00000 0.00000
   0  -3   6 1414.41   17.54  -1 0.00000 0.00000 0.00000 0.00000 0.00000 0.00000
  -5   3   4 1414.41   17.54   2 0.00000 0.00000 0.00000 0.00000 0.00000 0.00000
  -1  -3   7   87.39    1.93   2 0.00000 0.00000 0.00000 0.00000 0.00000 0.00000
  -2  -3   8    1.91    0.92   2 0.00000 0.00000 0.00000 0.00000 0.00000 0.00000
  -3  -3   9  205.23    3.15   2 0.00000 0.00000 0.00000 0.00000 0.00000 0.00000
  -4  -3  10   58.98    2.31   2 0.00000 0.00000 0.00000 0.00000 0.00000 0.00000
  -5  -3  11   31.64    2.58   2 0.00000 0.00000 0.00000 0.00000 0.00000 0.00000
  -6  -3  12   41.92    5.65  -1 0.00000 0.00000 0.00000 0.00000 0.00000 0.00000
  -6   3  12   41.92    5.65   2 0.00000 0.00000 0.00000 0.00000 0.00000 0.00000
  -7  -3  13  320.16    9.01  -1 0.00000 0.00000 0.00000 0.00000 0.00000 0.00000
  -6   3  13  320.16    9.01   2 0.00000 0.00000 0.00000 0.00000 0.00000 0.00000
  -8  -3  14  147.98    7.84  -1 0.00000 0.00000 0.00000 0.00000 0.00000 0.00000
  -6   3  14  147.98    7.84   2 0.00000 0.00000 0.00000 0.00000 0.00000 0.00000
  -9  -3  15   79.77    6.11   2 0.00000 0.00000 0.00000 0.00000 0.00000 0.00000
  13  -4  -6   64.05    2.90   2 0.00000 0.00000 0.00000 0.00000 0.00000 0.00000
  12  -4  -5   16.06    1.72   2 0.00000 0.00000 0.00000 0.00000 0.00000 0.00000
  11  -4  -4   55.59    2.17   2 0.00000 0.00000 0.00000 0.00000 0.00000 0.00000
  10  -4  -3   55.69    2.07   2 0.00000 0.00000 0.00000 0.00000 0.00000 0.00000
   9  -4  -2   44.84    1.86   2 0.00000 0.00000 0.00000 0.00000 0.00000 0.00000
   8  -4  -1  515.42    5.55  -1 0.00000 0.00000 0.00000 0.00000 0.00000 0.00000
   5  -4   5  515.42    5.55   2 0.00000 0.00000 0.00000 0.00000 0.00000 0.00000
   7  -4   0   41.92    1.80  -1 0.00000 0.00000 0.00000 0.00000 0.00000 0.00000
   5  -4   4   41.92    1.80   2 0.00000 0.00000 0.00000 0.00000 0.00000 0.00000
   6  -4   1    7.14    0.62   2 0.00000 0.00000 0.00000 0.00000 0.00000 0.00000
   5  -4   2 1511.39    9.22   2 0.00000 0.00000 0.00000 0.00000 0.00000 0.00000
   4  -4   3   31.68    1.06   2 0.00000 0.00000 0.00000 0.00000 0.00000 0.00000
   3  -4   4   16.78    1.18   2 0.00000 0.00000 0.00000 0.00000 0.00000 0.00000
   2  -4   5  174.05    2.03   2 0.00000 0.00000 0.00000 0.00000 0.00000 0.00000
   1  -4   6    0.29    0.62   2 0.00000 0.00000 0.00000 0.00000 0.00000 0.00000
   0  -4   7  291.18    5.87  -1 0.00000 0.00000 0.00000 0.00000 0.00000 0.00000
  -6   4   5  291.18    5.87   2 0.00000 0.00000 0.00000 0.00000 0.00000 0.00000
  -1  -4   8  416.52    5.30  -1 0.00000 0.00000 0.00000 0.00000 0.00000 0.00000
  -6   4   6  416.52    5.30   2 0.00000 0.00000 0.00000 0.00000 0.00000 0.00000
  -2  -4   9  334.87    4.00   2 0.00000 0.00000 0.00000 0.00000 0.00000 0.00000
  -2  -4   9  717.97   11.44  -1 0.00000 0.00000 0.00000 0.00000 0.00000 0.00000
  -6   4   7  717.97   11.44   2 0.00000 0.00000 0.00000 0.00000 0.00000 0.00000
  -3  -4  10  105.40    2.60   2 0.00000 0.00000 0.00000 0.00000 0.00000 0.00000
  -4  -4  11   83.40    2.60   2 0.00000 0.00000 0.00000 0.00000 0.00000 0.00000
  -5  -4  12    1.71    1.40   2 0.00000 0.00000 0.00000 0.00000 0.00000 0.00000
  -6  -4  13   33.00    2.46   2 0.00000 0.00000 0.00000 0.00000 0.00000 0.00000
  -7  -4  14  201.71    8.89  -1 0.00000 0.00000 0.00000 0.00000 0.00000 0.00000
  -7   4  14  201.71    8.89   2 0.00000 0.00000 0.00000 0.00000 0.00000 0.00000
  -8  -4  15   13.56    5.18  -1 0.00000 0.00000 0.00000 0.00000 0.00000 0.00000
  -7   4  15   13.56    5.18   2 0.00000 0.00000 0.00000 0.00000 0.00000 0.00000
  14  -5  -6  306.11    8.62  -1 0.00000 0.00000 0.00000 0.00000 0.00000 0.00000
   5  -5  12  306.11    8.62   2 0.00000 0.00000 0.00000 0.00000 0.00000 0.00000
  13  -5  -5  182.37    7.27  -1 0.00000 0.00000 0.00000 0.00000 0.00000 0.00000
   5  -5  11  182.37    7.27   2 0.00000 0.00000 0.00000 0.00000 0.00000 0.00000
  12  -5  -4    3.67    1.28   2 0.00000 0.00000 0.00000 0.00000 0.00000 0.00000
  11  -5  -3   59.43    2.21   2 0.00000 0.00000 0.00000 0.00000 0.00000 0.00000
  10  -5  -2  100.93    2.41   2 0.00000 0.00000 0.00000 0.00000 0.00000 0.00000
   9  -5  -1   17.68    1.56   2 0.00000 0.00000 0.00000 0.00000 0.00000 0.00000
   8  -5   0   62.60    1.89   2 0.00000 0.00000 0.00000 0.00000 0.00000 0.00000
   7  -5   1  826.48   12.81  -1 0.00000 0.00000 0.00000 0.00000 0.00000 0.00000
   6  -5   3  826.48   12.81   2 0.00000 0.00000 0.00000 0.00000 0.00000 0.00000
   6  -5   2   80.89    2.31  -1 0.00000 0.00000 0.00000 0.00000 0.00000 0.00000
   6  -5   2   80.89    2.31   2 0.00000 0.00000 0.00000 0.00000 0.00000 0.00000
   5  -5   3  355.60    3.07   2 0.00000 0.00000 0.00000 0.00000 0.00000 0.00000
   4  -5   4   52.41    1.53   2 0.00000 0.00000 0.00000 0.00000 0.00000 0.00000
   3  -5   5   50.42    1.57   2 0.00000 0.00000 0.00000 0.00000 0.00000 0.00000
   2  -5   6  662.81    4.97   2 0.00000 0.00000 0.00000 0.00000 0.00000 0.00000
   1  -5   7   80.77    1.69   2 0.00000 0.00000 0.00000 0.00000 0.00000 0.00000
   0  -5   8   43.35    1.53   2 0.00000 0.00000 0.00000 0.00000 0.00000 0.00000
  -1  -5   9  289.84    4.89  -1 0.00000 0.00000 0.00000 0.00000 0.00000 0.00000
  -7   5   7  289.84    4.89   2 0.00000 0.00000 0.00000 0.00000 0.00000 0.00000
  -2  -5  10  248.51    4.33  -1 0.00000 0.00000 0.00000 0.00000 0.00000 0.00000
  -7   5   8  248.51    4.33   2 0.00000 0.00000 0.00000 0.00000 0.00000 0.00000
  -3  -5  11   44.31    3.63  -1 0.00000 0.00000 0.00000 0.00000 0.00000 0.00000
  -7   5   9   44.31    3.63   2 0.00000 0.00000 0.00000 0.00000 0.00000 0.00000
  -4  -5  12  163.56    2.87   2 0.00000 0.00000 0.00000 0.00000 0.00000 0.00000
  -5  -5  13  252.21    3.60   2 0.00000 0.00000 0.00000 0.00000 0.00000 0.00000
  -6  -5  14   18.55    1.72   2 0.00000 0.00000 0.00000 0.00000 0.00000 0.00000
  -7  -5  15   98.43    2.89   2 0.00000 0.00000 0.00000 0.00000 0.00000 0.00000
  14  -6  -5  260.44    9.12  -1 0.00000 0.00000 0.00000 0.00000 0.00000 0.00000
   6  -6  11  260.44    9.12   2 0.00000 0.00000 0.00000 0.00000 0.00000 0.00000
  13  -6  -4   70.21    5.48  -1 0.00000 0.00000 0.00000 0.00000 0.00000 0.00000
   6  -6  10   70.21    5.48   2 0.00000 0.00000 0.00000 0.00000 0.00000 0.00000
  12  -6  -3   28.30    4.57  -1 0.00000 0.00000 0.00000 0.00000 0.00000 0.00000
   6  -6   9   28.30    4.57   2 0.00000 0.00000 0.00000 0.00000 0.00000 0.00000
  11  -6  -2   30.83    1.94   2 0.00000 0.00000 0.00000 0.00000 0.00000 0.00000
  11  -6  -2   37.14    5.47  -1 0.00000 0.00000 0.00000 0.00000 0.00000 0.00000
   6  -6   8   37.14    5.47   2 0.00000 0.00000 0.00000 0.00000 0.00000 0.00000
  10  -6  -1  124.66    2.60   2 0.00000 0.00000 0.00000 0.00000 0.00000 0.00000
   9  -6   0   55.95    1.95   2 0.00000 0.00000 0.00000 0.00000 0.00000 0.00000
   8  -6   1    5.05    1.21   2 0.00000 0.00000 0.00000 0.00000 0.00000 0.00000
   7  -6   2 1316.36   12.51   2 0.00000 0.00000 0.00000 0.00000 0.00000 0.00000
   6  -6   3    3.14    1.07   2 0.00000 0.00000 0.00000 0.00000 0.00000 0.00000
   5  -6   4  248.10    3.12  -1 0.00000 0.00000 0.00000 0.00000 0.00000 0.00000
   7  -6   0  248.10    3.12   2 0.00000 0.00000 0.00000 0.00000 0.00000 0.00000
   4  -6   5 1099.46    8.65  -1 0.00000 0.00000 0.00000 0.00000 0.00000 0.00000
   7  -6  -1 1099.46    8.65   2 0.00000 0.00000 0.00000 0.00000 0.00000 0.00000
   3  -6   6   94.38    2.06   2 0.00000 0.00000 0.00000 0.00000 0.00000 0.00000
   2  -6   7  190.43    2.47   2 0.00000 0.00000 0.00000 0.00000 0.00000 0.00000
   1  -6   8   17.73    1.34   2 0.00000 0.00000 0.00000 0.00000 0.00000 0.00000
   0  -6   9  171.91    2.55   2 0.00000 0.00000 0.00000 0.00000 0.00000 0.00000
  -1  -6  10  229.83    3.04   2 0.00000 0.00000 0.00000 0.00000 0.00000 0.00000
  -2  -6  11  256.81    5.41  -1 0.00000 0.00000 0.00000 0.00000 0.00000 0.00000
  -8   6   9  256.81    5.41   2 0.00000 0.00000 0.00000 0.00000 0.00000 0.00000
  -3  -6  12    2.30    4.33  -1 0.00000 0.00000 0.00000 0.00000 0.00000 0.00000
  -8   6  10    2.30    4.33   2 0.00000 0.00000 0.00000 0.00000 0.00000 0.00000
  -4  -6  13   62.97    6.24  -1 0.00000 0.00000 0.00000 0.00000 0.00000 0.00000
  -8   6  11   62.97    6.24   2 0.00000 0.00000 0.00000 0.00000 0.00000 0.00000
  -5  -6  14  168.38    3.18   2 0.00000 0.00000 0.00000 0.00000 0.00000 0.00000
  -6  -6  15   -0.78    1.65   2 0.00000 0.00000 0.00000 0.00000 0.00000 0.00000
  14  -7  -4    3.16    2.48   2 0.00000 0.00000 0.00000 0.00000 0.00000 0.00000
  13  -7  -3   56.88    2.46   2 0.00000 0.00000 0.00000 0.00000 0.00000 0.00000
  12  -7  -2  360.08    9.33  -1 0.00000 0.00000 0.00000 0.00000 0.00000 0.00000
   7  -7   8  360.08    9.33   2 0.00000 0.00000 0.00000 0.00000 0.00000 0.00000
  11  -7  -1   76.37    4.82  -1 0.00000 0.00000 0.00000 0.00000 0.00000 0.00000
   7  -7   7   76.37    4.82   2 0.00000 0.00000 0.00000 0.00000 0.00000 0.00000
  10  -7   0  248.50    7.73  -1 0.00000 0.00000 0.00000 0.00000 0.00000 0.00000
   7  -7   6  248.50    7.73   2 0.00000 0.00000 0.00000 0.00000 0.00000 0.00000
   9  -7   1   95.38    4.48   2 0.00000 0.00000 0.00000 0.00000 0.00000 0.00000
   8  -7   2   -1.37    1.82   2 0.00000 0.00000 0.00000 0.00000 0.00000 0.00000
   7  -7   3  231.84    4.09   2 0.00000 0.00000 0.00000 0.00000 0.00000 0.00000
   6  -7   4  299.23    4.62   2 0.00000 0.00000 0.00000 0.00000 0.00000 0.00000
   5  -7   5   35.69    2.22   2 0.00000 0.00000 0.00000 0.00000 0.00000 0.00000
   4  -7   6 1693.18   12.64  -1 0.00000 0.00000 0.00000 0.00000 0.00000 0.00000
  -8   7   2 1693.18   12.64   2 0.00000 0.00000 0.00000 0.00000 0.00000 0.00000
   3  -7   7  207.78    3.10  -1 0.00000 0.00000 0.00000 0.00000 0.00000 0.00000
  -8   7   3  207.78    3.10   2 0.00000 0.00000 0.00000 0.00000 0.00000 0.00000
   1  -7   9  167.12    3.00   2 0.00000 0.00000 0.00000 0.00000 0.00000 0.00000
   0  -7  10   54.07    1.93   2 0.00000 0.00000 0.00000 0.00000 0.00000 0.00000
  -1  -7  11  123.73    2.49   2 0.00000 0.00000 0.00000 0.00000 0.00000 0.00000
  -2  -7  12   65.23    2.18   2 0.00000 0.00000 0.00000 0.00000 0.00000 0.00000
  -4  -7  14   32.95    5.84  -1 0.00000 0.00000 0.00000 0.00000 0.00000 0.00000
  -9   7  12   32.95    5.84   2 0.00000 0.00000 0.00000 0.00000 0.00000 0.00000
  -5  -7  15  125.47    7.54  -1 0.00000 0.00000 0.00000 0.00000 0.00000 0.00000
  -9   7  13  125.47    7.54   2 0.00000 0.00000 0.00000 0.00000 0.00000 0.00000
  13  -8  -2   61.53    3.05   2 0.00000 0.00000 0.00000 0.00000 0.00000 0.00000
  12  -8  -1  193.61    4.20   2 0.00000 0.00000 0.00000 0.00000 0.00000 0.00000
  11  -8   0  100.45    6.04  -1 0.00000 0.00000 0.00000 0.00000 0.00000 0.00000
   8  -8   6  100.45    6.04   2 0.00000 0.00000 0.00000 0.00000 0.00000 0.00000
  10  -8   1    8.80    3.35  -1 0.00000 0.00000 0.00000 0.00000 0.00000 0.00000
   8  -8   5    8.80    3.35   2 0.00000 0.00000 0.00000 0.00000 0.00000 0.00000
   9  -8   2  842.21   14.20  -1 0.00000 0.00000 0.00000 0.00000 0.00000 0.00000
   8  -8   4  842.21   14.20   2 0.00000 0.00000 0.00000 0.00000 0.00000 0.00000
   8  -8   3   64.17    4.11   2 0.00000 0.00000 0.00000 0.00000 0.00000 0.00000
   7  -8   4   -0.21    1.29   2 0.00000 0.00000 0.00000 0.00000 0.00000 0.00000
   6  -8   5   20.64    1.98   2 0.00000 0.00000 0.00000 0.00000 0.00000 0.00000
   5  -8   6    1.38    1.28   2 0.00000 0.00000 0.00000 0.00000 0.00000 0.00000
   4  -8   7  488.38    6.43   2 0.00000 0.00000 0.00000 0.00000 0.00000 0.00000
   3  -8   8  274.38    3.89  -1 0.00000 0.00000 0.00000 0.00000 0.00000 0.00000
  -9   8   4  274.38    3.89   2 0.00000 0.00000 0.00000 0.00000 0.00000 0.00000
   2  -8   9   -6.54    3.00  -1 0.00000 0.00000 0.00000 0.00000 0.00000 0.00000
  -9   8   5   -6.54    3.00   2 0.00000 0.00000 0.00000 0.00000 0.00000 0.00000
   1  -8  10  420.56    9.01  -1 0.00000 0.00000 0.00000 0.00000 0.00000 0.00000
  -9   8   6  420.56    9.01   2 0.00000 0.00000 0.00000 0.00000 0.00000 0.00000
   0  -8  11    2.00    1.30   2 0.00000 0.00000 0.00000 0.00000 0.00000 0.00000
  -1  -8  12  102.55    3.59   2 0.00000 0.00000 0.00000 0.00000 0.00000 0.00000
  -2  -8  13    7.68    1.97   2 0.00000 0.00000 0.00000 0.00000 0.00000 0.00000
  -3  -8  14  195.23    4.88   2 0.00000 0.00000 0.00000 0.00000 0.00000 0.00000
  13  -9  -1   82.16    3.29   2 0.00000 0.00000 0.00000 0.00000 0.00000 0.00000
  12  -9   0   59.28    2.97   2 0.00000 0.00000 0.00000 0.00000 0.00000 0.00000
  11  -9   1   51.35    2.72   2 0.00000 0.00000 0.00000 0.00000 0.00000 0.00000
  10  -9   2   47.15    5.76  -1 0.00000 0.00000 0.00000 0.00000 0.00000 0.00000
   9  -9   4   47.15    5.76   2 0.00000 0.00000 0.00000 0.00000 0.00000 0.00000
   9  -9   3  489.51   10.16  -1 0.00000 0.00000 0.00000 0.00000 0.00000 0.00000
   9  -9   3  489.51   10.16   2 0.00000 0.00000 0.00000 0.00000 0.00000 0.00000
   8  -9   4   37.12    4.24  -1 0.00000 0.00000 0.00000 0.00000 0.00000 0.00000
   9  -9   2   37.12    4.24   2 0.00000 0.00000 0.00000 0.00000 0.00000 0.00000
   6  -9   6  112.34    3.35   2 0.00000 0.00000 0.00000 0.00000 0.00000 0.00000
   5  -9   7    3.02    1.48   2 0.00000 0.00000 0.00000 0.00000 0.00000 0.00000
   4  -9   8  108.76    3.31   2 0.00000 0.00000 0.00000 0.00000 0.00000 0.00000
   3  -9   9   46.50    2.71   2 0.00000 0.00000 0.00000 0.00000 0.00000 0.00000
   2  -9  10   99.34    5.79  -1 0.00000 0.00000 0.00000 0.00000 0.00000 0.00000
 -10   9   6   99.34    5.79   2 0.00000 0.00000 0.00000 0.00000 0.00000 0.00000
   1  -9  11  169.25    6.16  -1 0.00000 0.00000 0.00000 0.00000 0.00000 0.00000
 -10   9   7  169.25    6.16   2 0.00000 0.00000 0.00000 0.00000 0.00000 0.00000
   0  -9  12   60.14    4.80  -1 0.00000 0.00000 0.00000 0.00000 0.00000 0.00000
 -10   9   8   60.14    4.80   2 0.00000 0.00000 0.00000 0.00000 0.00000 0.00000
  -1  -9  13    8.06    2.02   2 0.00000 0.00000 0.00000 0.00000 0.00000 0.00000
  -1  -9  13   83.38    5.10  -1 0.00000 0.00000 0.00000 0.00000 0.00000 0.00000
 -10   9   9   83.38    5.10   2 0.00000 0.00000 0.00000 0.00000 0.00000 0.00000
  -2  -9  14   16.24    2.35   2 0.00000 0.00000 0.00000 0.00000 0.00000 0.00000
  12 -10   1   11.24    1.91   2 0.00000 0.00000 0.00000 0.00000 0.00000 0.00000
  11 -10   2  145.59    5.95   2 0.00000 0.00000 0.00000 0.00000 0.00000 0.00000
  10 -10   3    7.57    2.71   2 0.00000 0.00000 0.00000 0.00000 0.00000 0.00000
   9 -10   4   81.07    4.79   2 0.00000 0.00000 0.00000 0.00000 0.00000 0.00000
   8 -10   5   62.37    3.41  -1 0.00000 0.00000 0.00000 0.00000 0.00000 0.00000
  10 -10   1   62.37    3.41   2 0.00000 0.00000 0.00000 0.00000 0.00000 0.00000
   7 -10   6   45.50    2.84  -1 0.00000 0.00000 0.00000 0.00000 0.00000 0.00000
  10 -10   0   45.50    2.84   2 0.00000 0.00000 0.00000 0.00000 0.00000 0.00000
   6 -10   7  477.30    6.91  -1 0.00000 0.00000 0.00000 0.00000 0.00000 0.00000
 -10  10   1  477.30    6.91   2 0.00000 0.00000 0.00000 0.00000 0.00000 0.00000
   5 -10   8   -0.92    1.48   2 0.00000 0.00000 0.00000 0.00000 0.00000 0.00000
   4 -10   9    1.16    1.62   2 0.00000 0.00000 0.00000 0.00000 0.00000 0.00000
   3 -10  10   81.76    3.30   2 0.00000 0.00000 0.00000 0.00000 0.00000 0.00000
   2 -10  11   62.65    3.21   2 0.00000 0.00000 0.00000 0.00000 0.00000 0.00000
   1 -10  12   51.71    3.18   2 0.00000 0.00000 0.00000 0.00000 0.00000 0.00000
   1 -10  12   74.17    6.46  -1 0.00000 0.00000 0.00000 0.00000 0.00000 0.00000
 -11  10   8   74.17    6.46   2 0.00000 0.00000 0.00000 0.00000 0.00000 0.00000
   0 -10  13   89.21    5.94  -1 0.00000 0.00000 0.00000 0.00000 0.00000 0.00000
 -11  10   9   89.21    5.94   2 0.00000 0.00000 0.00000 0.00000 0.00000 0.00000
  11 -11   3  219.13    7.53   2 0.00000 0.00000 0.00000 0.00000 0.00000 0.00000
  10 -11   4    3.14    2.57   2 0.00000 0.00000 0.00000 0.00000 0.00000 0.00000
   9 -11   5   71.34    4.88   2 0.00000 0.00000 0.00000 0.00000 0.00000 0.00000
   8 -11   6  117.56    5.70   2 0.00000 0.00000 0.00000 0.00000 0.00000 0.00000
   7 -11   7   85.40    3.95  -1 0.00000 0.00000 0.00000 0.00000 0.00000 0.00000
 -11  11   1   85.40    3.95   2 0.00000 0.00000 0.00000 0.00000 0.00000 0.00000
   6 -11   8  360.20    8.72  -1 0.00000 0.00000 0.00000 0.00000 0.00000 0.00000
 -11  11   2  360.20    8.72   2 0.00000 0.00000 0.00000 0.00000 0.00000 0.00000
   5 -11   9  222.11    7.10  -1 0.00000 0.00000 0.00000 0.00000 0.00000 0.00000
 -11  11   3  222.11    7.10   2 0.00000 0.00000 0.00000 0.00000 0.00000 0.00000
   4 -11  10  101.40    3.69   2 0.00000 0.00000 0.00000 0.00000 0.00000 0.00000
   3 -11  11  168.49    4.47   2 0.00000 0.00000 0.00000 0.00000 0.00000 0.00000
   2 -11  12   57.79    3.37   2 0.00000 0.00000 0.00000 0.00000 0.00000 0.00000
   9 -12   6    8.33    3.01   2 0.00000 0.00000 0.00000 0.00000 0.00000 0.00000
   8 -12   7  103.27    5.69   2 0.00000 0.00000 0.00000 0.00000 0.00000 0.00000
   7 -12   8    3.56    2.89   2 0.00000 0.00000 0.00000 0.00000 0.00000 0.00000
   6 -12   9  131.86    6.92  -1 0.00000 0.00000 0.00000 0.00000 0.00000 0.00000
 -12  12   3  131.86    6.92   2 0.00000 0.00000 0.00000 0.00000 0.00000 0.00000
   5 -12  10   85.75    5.75  -1 0.00000 0.00000 0.00000 0.00000 0.00000 0.00000
 -12  12   4   85.75    5.75   2 0.00000 0.00000 0.00000 0.00000 0.00000 0.00000
   4 -12  11  154.86    6.65  -1 0.00000 0.00000 0.00000 0.00000 0.00000 0.00000
 -12  12   5  154.86    6.65   2 0.00000 0.00000 0.00000 0.00000 0.00000 0.00000
  -2  14  -8   64.32    5.35  -1 0.00000 0.00000 0.00000 0.00000 0.00000 0.00000
  -8  14   4   64.32    5.35   2 0.00000 0.00000 0.00000 0.00000 0.00000 0.00000
  -3  14  -7  105.78    4.98   2 0.00000 0.00000 0.00000 0.00000 0.00000 0.00000
  -4  14  -6   -3.46    2.21   2 0.00000 0.00000 0.00000 0.00000 0.00000 0.00000
  -5  14  -5   88.69    4.91   2 0.00000 0.00000 0.00000 0.00000 0.00000 0.00000
  -6  14  -4   21.14    3.05   2 0.00000 0.00000 0.00000 0.00000 0.00000 0.00000
  -7  14  -3   70.80    4.66   2 0.00000 0.00000 0.00000 0.00000 0.00000 0.00000
  -8  14  -2  296.20    8.48  -1 0.00000 0.00000 0.00000 0.00000 0.00000 0.00000
  -7  14  -4  296.20    8.48   2 0.00000 0.00000 0.00000 0.00000 0.00000 0.00000
  -9  14  -1   45.99    4.59  -1 0.00000 0.00000 0.00000 0.00000 0.00000 0.00000
  -7  14  -5   45.99    4.59   2 0.00000 0.00000 0.00000 0.00000 0.00000 0.00000
 -10  14   0    0.95    5.49  -1 0.00000 0.00000 0.00000 0.00000 0.00000 0.00000
  -7  14  -6    0.95    5.49   2 0.00000 0.00000 0.00000 0.00000 0.00000 0.00000
   0  13  -9   56.91    3.00   2 0.00000 0.00000 0.00000 0.00000 0.00000 0.00000
  -1  13  -8   33.27    4.96  -1 0.00000 0.00000 0.00000 0.00000 0.00000 0.00000
  -7  13   4   33.27    4.96   2 0.00000 0.00000 0.00000 0.00000 0.00000 0.00000
  -2  13  -7  179.45    5.89  -1 0.00000 0.00000 0.00000 0.00000 0.00000 0.00000
  -7  13   3  179.45    5.89   2 0.00000 0.00000 0.00000 0.00000 0.00000 0.00000
  -3  13  -6  311.97    7.70  -1 0.00000 0.00000 0.00000 0.00000 0.00000 0.00000
  -7  13   2  311.97    7.70   2 0.00000 0.00000 0.00000 0.00000 0.00000 0.00000
  -4  13  -5   48.67    5.26  -1 0.00000 0.00000 0.00000 0.00000 0.00000 0.00000
  -7  13   1   48.67    5.26   2 0.00000 0.00000 0.00000 0.00000 0.00000 0.00000
  -5  13  -4   30.24    3.64   2 0.00000 0.00000 0.00000 0.00000 0.00000 0.00000
  -6  13  -3   90.98    4.59   2 0.00000 0.00000 0.00000 0.00000 0.00000 0.00000
  -7  13  -2   20.09    2.88   2 0.00000 0.00000 0.00000 0.00000 0.00000 0.00000
  -8  13  -1  121.95    5.25   2 0.00000 0.00000 0.00000 0.00000 0.00000 0.00000
  -9  13   0  188.71    5.02  -1 0.00000 0.00000 0.00000 0.00000 0.00000 0.00000
  -6  13  -6  188.71    5.02   2 0.00000 0.00000 0.00000 0.00000 0.00000 0.00000
 -10  13   1   38.33    3.07  -1 0.00000 0.00000 0.00000 0.00000 0.00000 0.00000
   6 -13   7   38.33    3.07   2 0.00000 0.00000 0.00000 0.00000 0.00000 0.00000
 -11  13   2  424.36    7.27  -1 0.00000 0.00000 0.00000 0.00000 0.00000 0.00000
   6 -13   8  424.36    7.27   2 0.00000 0.00000 0.00000 0.00000 0.00000 0.00000
   2  12 -10  190.24    3.62   2 0.00000 0.00000 0.00000 0.00000 0.00000 0.00000
   1  12  -9  131.45    3.05   2 0.00000 0.00000 0.00000 0.00000 0.00000 0.00000
   0  12  -8   88.56    2.63   2 0.00000 0.00000 0.00000 0.00000 0.00000 0.00000
  -1  12  -7   56.12    2.31   2 0.00000 0.00000 0.00000 0.00000 0.00000 0.00000
  -3  12  -5  259.32    6.76  -1 0.00000 0.00000 0.00000 0.00000 0.00000 0.00000
  -6  12   1  259.32    6.76   2 0.00000 0.00000 0.00000 0.00000 0.00000 0.00000
  -4  12  -4   70.61    4.18  -1 0.00000 0.00000 0.00000 0.00000 0.00000 0.00000
  -6  12   0   70.61    4.18   2 0.00000 0.00000 0.00000 0.00000 0.00000 0.00000
  -5  12  -3   63.18    4.76  -1 0.00000 0.00000 0.00000 0.00000 0.00000 0.00000
  -6  12  -1   63.18    4.76   2 0.00000 0.00000 0.00000 0.00000 0.00000 0.00000
  -6  12  -2  400.47    8.32   2 0.00000 0.00000 0.00000 0.00000 0.00000 0.00000
  -7  12  -1   38.14    3.58   2 0.00000 0.00000 0.00000 0.00000 0.00000 0.00000
  -8  12   0    3.90    2.26   2 0.00000 0.00000 0.00000 0.00000 0.00000 0.00000
  -9  12   1   63.41    4.23   2 0.00000 0.00000 0.00000 0.00000 0.00000 0.00000
 -10  12   2  146.92    6.76  -1 0.00000 0.00000 0.00000 0.00000 0.00000 0.00000
   5 -12   8  146.92    6.76   2 0.00000 0.00000 0.00000 0.00000 0.00000 0.00000
 -11  12   3   76.90    3.85  -1 0.00000 0.00000 0.00000 0.00000 0.00000 0.00000
   5 -12   9   76.90    3.85   2 0.00000 0.00000 0.00000 0.00000 0.00000 0.00000
 -12  12   4   76.54    3.90  -1 0.00000 0.00000 0.00000 0.00000 0.00000 0.00000
   5 -12  10   76.54    3.90   2 0.00000 0.00000 0.00000 0.00000 0.00000 0.00000
   3  11 -10  185.01    8.16  -1 0.00000 0.00000 0.00000 0.00000 0.00000 0.00000
  -6  11   8  185.01    8.16   2 0.00000 0.00000 0.00000 0.00000 0.00000 0.00000
   2  11  -9  314.02    5.74  -1 0.00000 0.00000 0.00000 0.00000 0.00000 0.00000
  -6  11   7  314.02    5.74   2 0.00000 0.00000 0.00000 0.00000 0.00000 0.00000
   1  11  -8    2.28    1.17   2 0.00000 0.00000 0.00000 0.00000 0.00000 0.00000
   1  11  -8   19.31    4.69  -1 0.00000 0.00000 0.00000 0.00000 0.00000 0.00000
  -6  11   6   19.31    4.69   2 0.00000 0.00000 0.00000 0.00000 0.00000 0.00000
   0  11  -7   95.59    2.51   2 0.00000 0.00000 0.00000 0.00000 0.00000 0.00000
  -1  11  -6  152.14    2.89   2 0.00000 0.00000 0.00000 0.00000 0.00000 0.00000
  -2  11  -5   15.93    1.43   2 0.00000 0.00000 0.00000 0.00000 0.00000 0.00000
  -3  11  -4   77.27    2.69   2 0.00000 0.00000 0.00000 0.00000 0.00000 0.00000
  -4  11  -3  390.69    8.11  -1 0.00000 0.00000 0.00000 0.00000 0.00000 0.00000
  -5  11  -1  390.69    8.11   2 0.00000 0.00000 0.00000 0.00000 0.00000 0.00000
  -5  11  -2  109.01    4.36  -1 0.00000 0.00000 0.00000 0.00000 0.00000 0.00000
  -5  11  -2  109.01    4.36   2 0.00000 0.00000 0.00000 0.00000 0.00000 0.00000
  -6  11  -1  239.82    4.56  -1 0.00000 0.00000 0.00000 0.00000 0.00000 0.00000
  -5  11  -3  239.82    4.56   2 0.00000 0.00000 0.00000 0.00000 0.00000 0.00000
  -7  11   0  136.35    4.91   2 0.00000 0.00000 0.00000 0.00000 0.00000 0.00000
  -8  11   1    0.75    1.98   2 0.00000 0.00000 0.00000 0.00000 0.00000 0.00000
  -9  11   2  166.03    5.61   2 0.00000 0.00000 0.00000 0.00000 0.00000 0.00000
 -10  11   3  158.94    5.63   2 0.00000 0.00000 0.00000 0.00000 0.00000 0.00000
 -11  11   4    7.21    2.64   2 0.00000 0.00000 0.00000 0.00000 0.00000 0.00000
 -12  11   5  209.29    5.36  -1 0.00000 0.00000 0.00000 0.00000 0.00000 0.00000
   4 -11  11  209.29    5.36   2 0.00000 0.00000 0.00000 0.00000 0.00000 0.00000
   5  10 -11   31.56    2.16   2 0.00000 0.00000 0.00000 0.00000 0.00000 0.00000
   4  10 -10  111.94    2.80   2 0.00000 0.00000 0.00000 0.00000 0.00000 0.00000
   3  10  -9  157.48    8.29  -1 0.00000 0.00000 0.00000 0.00000 0.00000 0.00000
  -5  10   7  157.48    8.29   2 0.00000 0.00000 0.00000 0.00000 0.00000 0.00000
   2  10  -8  170.52    4.08  -1 0.00000 0.00000 0.00000 0.00000 0.00000 0.00000
  -5  10   6  170.52    4.08   2 0.00000 0.00000 0.00000 0.00000 0.00000 0.00000
   1  10  -7  369.72    6.99  -1 0.00000 0.00000 0.00000 0.00000 0.00000 0.00000
  -5  10   5  369.72    6.99   2 0.00000 0.00000 0.00000 0.00000 0.00000 0.00000
   0  10  -6  195.69    5.66  -1 0.00000 0.00000 0.00000 0.00000 0.00000 0.00000
  -5  10   4  195.69    5.66   2 0.00000 0.00000 0.00000 0.00000 0.00000 0.00000
   0  10  -6    3.72    1.05   2 0.00000 0.00000 0.00000 0.00000 0.00000 0.00000
  -1  10  -5  455.60    4.78   2 0.00000 0.00000 0.00000 0.00000 0.00000 0.00000
  -2  10  -4    4.95    1.02   2 0.00000 0.00000 0.00000 0.00000 0.00000 0.00000
  -3  10  -3   53.69    2.24   2 0.00000 0.00000 0.00000 0.00000 0.00000 0.00000
  -4  10  -2  277.10    4.16   2 0.00000 0.00000 0.00000 0.00000 0.00000 0.00000
  -5  10  -1    0.79    1.06   2 0.00000 0.00000 0.00000 0.00000 0.00000 0.00000
  -6  10   0   28.53    1.97  -1 0.00000 0.00000 0.00000 0.00000 0.00000 0.00000
  -4  10  -4   28.53    1.97   2 0.00000 0.00000 0.00000 0.00000 0.00000 0.00000
  -7  10   1  201.06    3.40  -1 0.00000 0.00000 0.00000 0.00000 0.00000 0.00000
  -4  10  -5  201.06    3.40   2 0.00000 0.00000 0.00000 0.00000 0.00000 0.00000
  -8  10   2  163.58    5.19   2 0.00000 0.00000 0.00000 0.00000 0.00000 0.00000
  -9  10   3   95.62    4.43   2 0.00000 0.00000 0.00000 0.00000 0.00000 0.00000
 -10  10   4  107.76    4.82   2 0.00000 0.00000 0.00000 0.00000 0.00000 0.00000
 -11  10   5   18.32    2.14   2 0.00000 0.00000 0.00000 0.00000 0.00000 0.00000
 -12  10   6   62.17    3.39   2 0.00000 0.00000 0.00000 0.00000 0.00000 0.00000
 -13  10   7   88.50    3.90   2 0.00000 0.00000 0.00000 0.00000 0.00000 0.00000
   6   9 -11   29.24    2.07   2 0.00000 0.00000 0.00000 0.00000 0.00000 0.00000
   5   9 -10   15.04    1.59   2 0.00000 0.00000 0.00000 0.00000 0.00000 0.00000
   4   9  -9  260.48    3.77   2 0.00000 0.00000 0.00000 0.00000 0.00000 0.00000
   3   9  -8    3.34    1.09   2 0.00000 0.00000 0.00000 0.00000 0.00000 0.00000
   2   9  -7   44.92    1.90   2 0.00000 0.00000 0.00000 0.00000 0.00000 0.00000
   1   9  -6  232.09    5.42  -1 0.00000 0.00000 0.00000 0.00000 0.00000 0.00000
  -4   9   4  232.09    5.42   2 0.00000 0.00000 0.00000 0.00000 0.00000 0.00000
   0   9  -5  304.64    5.96  -1 0.00000 0.00000 0.00000 0.00000 0.00000 0.00000
  -4   9   3  304.64    5.96   2 0.00000 0.00000 0.00000 0.00000 0.00000 0.00000
  -1   9  -4  544.10    9.00  -1 0.00000 0.00000 0.00000 0.00000 0.00000 0.00000
  -4   9   2  544.10    9.00   2 0.00000 0.00000 0.00000 0.00000 0.00000 0.00000
  -2   9  -3  124.67    2.29   2 0.00000 0.00000 0.00000 0.00000 0.00000 0.00000
  -3   9  -2   94.46    2.41   2 0.00000 0.00000 0.00000 0.00000 0.00000 0.00000
  -4   9  -1  510.73    5.71   2 0.00000 0.00000 0.00000 0.00000 0.00000 0.00000
  -5   9   0   14.75    1.67   2 0.00000 0.00000 0.00000 0.00000 0.00000 0.00000
  -6   9   1   18.52    1.77   2 0.00000 0.00000 0.00000 0.00000 0.00000 0.00000
  -7   9   2  338.03    4.26  -1 0.00000 0.00000 0.00000 0.00000 0.00000 0.00000
   3  -9   6  338.03    4.26   2 0.00000 0.00000 0.00000 0.00000 0.00000 0.00000
  -8   9   3  124.24    2.80  -1 0.00000 0.00000 0.00000 0.00000 0.00000 0.00000
   3  -9   7  124.24    2.80   2 0.00000 0.00000 0.00000 0.00000 0.00000 0.00000
  -9   9   4  162.54    4.33  -1 0.00000 0.00000 0.00000 0.00000 0.00000 0.00000
   3  -9   8  162.54    4.33   2 0.00000 0.00000 0.00000 0.00000 0.00000 0.00000
  -9   9   4   91.25    4.22   2 0.00000 0.00000 0.00000 0.00000 0.00000 0.00000
 -10   9   5  101.46    4.60   2 0.00000 0.00000 0.00000 0.00000 0.00000 0.00000
 -11   9   6  181.95    4.39   2 0.00000 0.00000 0.00000 0.00000 0.00000 0.00000
 -12   9   7   40.73    3.11   2 0.00000 0.00000 0.00000 0.00000 0.00000 0.00000
 -13   9   8   15.44    2.38   2 0.00000 0.00000 0.00000 0.00000 0.00000 0.00000
   7   8 -11   50.80    6.07  -1 0.00000 0.00000 0.00000 0.00000 0.00000 0.00000
  -4   8  11   50.80    6.07   2 0.00000 0.00000 0.00000 0.00000 0.00000 0.00000
   6   8 -10   65.72    6.44  -1 0.00000 0.00000 0.00000 0.00000 0.00000 0.00000
  -4   8  10   65.72    6.44   2 0.00000 0.00000 0.00000 0.00000 0.00000 0.00000
   5   8  -9  114.98    2.99   2 0.00000 0.00000 0.00000 0.00000 0.00000 0.00000
   5   8  -9  433.38   12.09  -1 0.00000 0.00000 0.00000 0.00000 0.00000 0.00000
  -4   8   9  433.38   12.09   2 0.00000 0.00000 0.00000 0.00000 0.00000 0.00000
   4   8  -8  317.49    4.62   2 0.00000 0.00000 0.00000 0.00000 0.00000 0.00000
   3   8  -7  104.79    2.66   2 0.00000 0.00000 0.00000 0.00000 0.00000 0.00000
   2   8  -6    2.37    0.92   2 0.00000 0.00000 0.00000 0.00000 0.00000 0.00000
   1   8  -5  201.99    2.81   2 0.00000 0.00000 0.00000 0.00000 0.00000 0.00000
   0   8  -4  653.70    9.59  -1 0.00000 0.00000 0.00000 0.00000 0.00000 0.00000
  -3   8   2  653.70    9.59   2 0.00000 0.00000 0.00000 0.00000 0.00000 0.00000
  -1   8  -3  278.23    3.53  -1 0.00000 0.00000 0.00000 0.00000 0.00000 0.00000
  -3   8   1  278.23    3.53   2 0.00000 0.00000 0.00000 0.00000 0.00000 0.00000
  -2   8  -2  803.58    7.63  -1 0.00000 0.00000 0.00000 0.00000 0.00000 0.00000
  -3   8   0  803.58    7.63   2 0.00000 0.00000 0.00000 0.00000 0.00000 0.00000
  -3   8  -1   15.00    1.44   2 0.00000 0.00000 0.00000 0.00000 0.00000 0.00000
  -4   8   0  150.42    2.63   2 0.00000 0.00000 0.00000 0.00000 0.00000 0.00000
  -5   8   1   38.79    1.70   2 0.00000 0.00000 0.00000 0.00000 0.00000 0.00000
  -6   8   2   57.91    1.97   2 0.00000 0.00000 0.00000 0.00000 0.00000 0.00000
  -7   8   3  512.22    5.89   2 0.00000 0.00000 0.00000 0.00000 0.00000 0.00000
  -8   8   4   85.73    2.80  -1 0.00000 0.00000 0.00000 0.00000 0.00000 0.00000
   2  -8   8   85.73    2.80   2 0.00000 0.00000 0.00000 0.00000 0.00000 0.00000
  -9   8   5   -2.00    1.72  -1 0.00000 0.00000 0.00000 0.00000 0.00000 0.00000
   2  -8   9   -2.00    1.72   2 0.00000 0.00000 0.00000 0.00000 0.00000 0.00000
 -10   8   6  421.22    6.57  -1 0.00000 0.00000 0.00000 0.00000 0.00000 0.00000
   2  -8  10  421.22    6.57   2 0.00000 0.00000 0.00000 0.00000 0.00000 0.00000
 -11   8   7  176.31    3.51   2 0.00000 0.00000 0.00000 0.00000 0.00000 0.00000
 -12   8   8   23.67    2.01   2 0.00000 0.00000 0.00000 0.00000 0.00000 0.00000
 -13   8   9   39.01    2.76   2 0.00000 0.00000 0.00000 0.00000 0.00000 0.00000
   8   7 -11   26.27    1.95   2 0.00000 0.00000 0.00000 0.00000 0.00000 0.00000
   7   7 -10    9.12    1.23   2 0.00000 0.00000 0.00000 0.00000 0.00000 0.00000
   7   7 -10   66.46    7.78  -1 0.00000 0.00000 0.00000 0.00000 0.00000 0.00000
  -3   7  10   66.46    7.78   2 0.00000 0.00000 0.00000 0.00000 0.00000 0.00000
   6   7  -9  228.61    5.37  -1 0.00000 0.00000 0.00000 0.00000 0.00000 0.00000
  -3   7   9  228.61    5.37   2 0.00000 0.00000 0.00000 0.00000 0.00000 0.00000
   5   7  -8  340.48    6.03  -1 0.00000 0.00000 0.00000 0.00000 0.00000 0.00000
  -3   7   8  340.48    6.03   2 0.00000 0.00000 0.00000 0.00000 0.00000 0.00000
   4   7  -7  166.95    7.49  -1 0.00000 0.00000 0.00000 0.00000 0.00000 0.00000
  -3   7   7  166.95    7.49   2 0.00000 0.00000 0.00000 0.00000 0.00000 0.00000
   3   7  -6  201.38    2.72   2 0.00000 0.00000 0.00000 0.00000 0.00000 0.00000
   2   7  -5  146.27    2.21   2 0.00000 0.00000 0.00000 0.00000 0.00000 0.00000
   1   7  -4  457.62    3.61   2 0.00000 0.00000 0.00000 0.00000 0.00000 0.00000
   0   7  -3    8.74    0.69   2 0.00000 0.00000 0.00000 0.00000 0.00000 0.00000
  -1   7  -2   14.65    1.18   2 0.00000 0.00000 0.00000 0.00000 0.00000 0.00000
  -2   7  -1 1260.79   11.08  -1 0.00000 0.00000 0.00000 0.00000 0.00000 0.00000
  -2   7  -1 1260.79   11.08   2 0.00000 0.00000 0.00000 0.00000 0.00000 0.00000
  -3   7   0  156.66    2.33  -1 0.00000 0.00000 0.00000 0.00000 0.00000 0.00000
  -2   7  -2  156.66    2.33   2 0.00000 0.00000 0.00000 0.00000 0.00000 0.00000
  -4   7   1   67.80    1.71   2 0.00000 0.00000 0.00000 0.00000 0.00000 0.00000
  -5   7   2    0.87    0.78   2 0.00000 0.00000 0.00000 0.00000 0.00000 0.00000
  -6   7   3  239.01    3.41   2 0.00000 0.00000 0.00000 0.00000 0.00000 0.00000
  -7   7   4  352.20    4.57   2 0.00000 0.00000 0.00000 0.00000 0.00000 0.00000
  -8   7   5   50.81    3.29   2 0.00000 0.00000 0.00000 0.00000 0.00000 0.00000
  -9   7   6  472.19    9.81  -1 0.00000 0.00000 0.00000 0.00000 0.00000 0.00000
   1  -7  10  472.19    9.81   2 0.00000 0.00000 0.00000 0.00000 0.00000 0.00000
 -10   7   7  478.08    5.62  -1 0.00000 0.00000 0.00000 0.00000 0.00000 0.00000
   1  -7  11  478.08    5.62   2 0.00000 0.00000 0.00000 0.00000 0.00000 0.00000
 -11   7   8  177.09    4.77  -1 0.00000 0.00000 0.00000 0.00000 0.00000 0.00000
   1  -7  12  177.09    4.77   2 0.00000 0.00000 0.00000 0.00000 0.00000 0.00000
 -13   7  10    4.39    1.82   2 0.00000 0.00000 0.00000 0.00000 0.00000 0.00000
   9   6 -11    5.03    1.25   2 0.00000 0.00000 0.00000 0.00000 0.00000 0.00000
   8   6 -10   -0.37    1.06   2 0.00000 0.00000 0.00000 0.00000 0.00000 0.00000
   7   6  -9    5.39    1.09   2 0.00000 0.00000 0.00000 0.00000 0.00000 0.00000
   6   6  -8  227.71    3.15   2 0.00000 0.00000 0.00000 0.00000 0.00000 0.00000
   5   6  -7   54.36    3.60  -1 0.00000 0.00000 0.00000 0.00000 0.00000 0.00000
  -2   6   7   54.36    3.60   2 0.00000 0.00000 0.00000 0.00000 0.00000 0.00000
   4   6  -6  103.86    3.14  -1 0.00000 0.00000 0.00000 0.00000 0.00000 0.00000
  -2   6   6  103.86    3.14   2 0.00000 0.00000 0.00000 0.00000 0.00000 0.00000
   3   6  -5 1526.43   15.52  -1 0.00000 0.00000 0.00000 0.00000 0.00000 0.00000
  -2   6   5 1526.43   15.52   2 0.00000 0.00000 0.00000 0.00000 0.00000 0.00000
   2   6  -4   63.26    1.19   2 0.00000 0.00000 0.00000 0.00000 0.00000 0.00000
   1   6  -3  211.54    2.32   2 0.00000 0.00000 0.00000 0.00000 0.00000 0.00000
   0   6  -2  178.40    2.13   2 0.00000 0.00000 0.00000 0.00000 0.00000 0.00000
  -1   6  -1   52.99    1.54   2 0.00000 0.00000 0.00000 0.00000 0.00000 0.00000
  -2   6   0 1039.35    8.99   2 0.00000 0.00000 0.00000 0.00000 0.00000 0.00000
  -3   6   1  128.07    1.97   2 0.00000 0.00000 0.00000 0.00000 0.00000 0.00000
  -3   6   1  336.86    6.08  -1 0.00000 0.00000 0.00000 0.00000 0.00000 0.00000
  -1   6  -3  336.86    6.08   2 0.00000 0.00000 0.00000 0.00000 0.00000 0.00000
  -4   6   2   89.86    1.79  -1 0.00000 0.00000 0.00000 0.00000 0.00000 0.00000
  -1   6  -4   89.86    1.79   2 0.00000 0.00000 0.00000 0.00000 0.00000 0.00000
  -5   6   3  770.16   11.39  -1 0.00000 0.00000 0.00000 0.00000 0.00000 0.00000
   1  -6   5  770.16   11.39   2 0.00000 0.00000 0.00000 0.00000 0.00000 0.00000
  -5   6   3  244.56    3.20   2 0.00000 0.00000 0.00000 0.00000 0.00000 0.00000
  -6   6   4  252.46    3.47   2 0.00000 0.00000 0.00000 0.00000 0.00000 0.00000
  -7   6   5    7.16    1.74   2 0.00000 0.00000 0.00000 0.00000 0.00000 0.00000
  -8   6   6   17.97    1.84   2 0.00000 0.00000 0.00000 0.00000 0.00000 0.00000
  -9   6   7  417.08    5.93   2 0.00000 0.00000 0.00000 0.00000 0.00000 0.00000
 -10   6   8   24.64    2.55   2 0.00000 0.00000 0.00000 0.00000 0.00000 0.00000
 -11   6   9  303.12    6.09  -1 0.00000 0.00000 0.00000 0.00000 0.00000 0.00000
   0  -6  13  303.12    6.09   2 0.00000 0.00000 0.00000 0.00000 0.00000 0.00000
 -12   6  10   76.78    3.93  -1 0.00000 0.00000 0.00000 0.00000 0.00000 0.00000
   0  -6  14   76.78    3.93   2 0.00000 0.00000 0.00000 0.00000 0.00000 0.00000
 -13   6  11   19.10    4.24  -1 0.00000 0.00000 0.00000 0.00000 0.00000 0.00000
   0  -6  15   19.10    4.24   2 0.00000 0.00000 0.00000 0.00000 0.00000 0.00000
  10   5 -11   53.42    4.49  -1 0.00000 0.00000 0.00000 0.00000 0.00000 0.00000
  -2   5  13   53.42    4.49   2 0.00000 0.00000 0.00000 0.00000 0.00000 0.00000
   9   5 -10   65.33    2.21   2 0.00000 0.00000 0.00000 0.00000 0.00000 0.00000
   9   5 -10  115.26    8.78  -1 0.00000 0.00000 0.00000 0.00000 0.00000 0.00000
  -2   5  12  115.26    8.78   2 0.00000 0.00000 0.00000 0.00000 0.00000 0.00000
   8   5  -9   20.74    1.70   2 0.00000 0.00000 0.00000 0.00000 0.00000 0.00000
   7   5  -8  141.80    2.53   2 0.00000 0.00000 0.00000 0.00000 0.00000 0.00000
   6   5  -7   68.09    1.85   2 0.00000 0.00000 0.00000 0.00000 0.00000 0.00000
   5   5  -6   45.91    1.58   2 0.00000 0.00000 0.00000 0.00000 0.00000 0.00000
   4   5  -5  105.48    5.52  -1 0.00000 0.00000 0.00000 0.00000 0.00000 0.00000
  -1   5   5  105.48    5.52   2 0.00000 0.00000 0.00000 0.00000 0.00000 0.00000
   3   5  -4 1500.95   14.93  -1 0.00000 0.00000 0.00000 0.00000 0.00000 0.00000
  -1   5   4 1500.95   14.93   2 0.00000 0.00000 0.00000 0.00000 0.00000 0.00000
   2   5  -3   56.38    2.27  -1 0.00000 0.00000 0.00000 0.00000 0.00000 0.00000
  -1   5   3   56.38    2.27   2 0.00000 0.00000 0.00000 0.00000 0.00000 0.00000
   1   5  -2  242.84    2.37   2 0.00000 0.00000 0.00000 0.00000 0.00000 0.00000
   0   5  -1  917.32   11.15   2 0.00000 0.00000 0.00000 0.00000 0.00000 0.00000
  -1   5   0   48.34    1.29   2 0.00000 0.00000 0.00000 0.00000 0.00000 0.00000
  -2   5   1  265.88    2.77   2 0.00000 0.00000 0.00000 0.00000 0.00000 0.00000
  -3   5   2  403.29    3.94   2 0.00000 0.00000 0.00000 0.00000 0.00000 0.00000
  -4   5   3  573.08    5.49   2 0.00000 0.00000 0.00000 0.00000 0.00000 0.00000
  -5   5   4 1551.45    9.81  -1 0.00000 0.00000 0.00000 0.00000 0.00000 0.00000
   0  -5   6 1551.45    9.81   2 0.00000 0.00000 0.00000 0.00000 0.00000 0.00000
  -6   5   5  202.42    2.62  -1 0.00000 0.00000 0.00000 0.00000 0.00000 0.00000
   0  -5   7  202.42    2.62   2 0.00000 0.00000 0.00000 0.00000 0.00000 0.00000
  -7   5   6   99.58    2.73   2 0.00000 0.00000 0.00000 0.00000 0.00000 0.00000
  -8   5   7  146.21    3.48   2 0.00000 0.00000 0.00000 0.00000 0.00000 0.00000
  -9   5   8  272.29    4.72   2 0.00000 0.00000 0.00000 0.00000 0.00000 0.00000
 -10   5   9   13.67    1.97   2 0.00000 0.00000 0.00000 0.00000 0.00000 0.00000
 -11   5  10    9.29    2.05   2 0.00000 0.00000 0.00000 0.00000 0.00000 0.00000
 -12   5  11  413.05    7.67  -1 0.00000 0.00000 0.00000 0.00000 0.00000 0.00000
  -1  -5  15  413.05    7.67   2 0.00000 0.00000 0.00000 0.00000 0.00000 0.00000
  10   4 -10   -4.19    3.84  -1 0.00000 0.00000 0.00000 0.00000 0.00000 0.00000
  -1   4  12   -4.19    3.84   2 0.00000 0.00000 0.00000 0.00000 0.00000 0.00000
   9   4  -9  333.30    6.59  -1 0.00000 0.00000 0.00000 0.00000 0.00000 0.00000
  -1   4  11  333.30    6.59   2 0.00000 0.00000 0.00000 0.00000 0.00000 0.00000
   8   4  -8  443.53    7.70  -1 0.00000 0.00000 0.00000 0.00000 0.00000 0.00000
  -1   4  10  443.53    7.70   2 0.00000 0.00000 0.00000 0.00000 0.00000 0.00000
   7   4  -7   72.04    1.88   2 0.00000 0.00000 0.00000 0.00000 0.00000 0.00000
   6   4  -6    9.53    0.88   2 0.00000 0.00000 0.00000 0.00000 0.00000 0.00000
   5   4  -5  435.89    3.53   2 0.00000 0.00000 0.00000 0.00000 0.00000 0.00000
   4   4  -4    5.87    0.56   2 0.00000 0.00000 0.00000 0.00000 0.00000 0.00000
   3   4  -3  162.10    1.71   2 0.00000 0.00000 0.00000 0.00000 0.00000 0.00000
   2   4  -2   32.52    2.04  -1 0.00000 0.00000 0.00000 0.00000 0.00000 0.00000
   0   4   2   32.52    2.04   2 0.00000 0.00000 0.00000 0.00000 0.00000 0.00000
   1   4  -1  276.26    4.27  -1 0.00000 0.00000 0.00000 0.00000 0.00000 0.00000
   0   4   1  276.26    4.27   2 0.00000 0.00000 0.00000 0.00000 0.00000 0.00000
   0   4   0 3422.58   37.54   2 0.00000 0.00000 0.00000 0.00000 0.00000 0.00000
  -1   4   1   53.72    1.26   2 0.00000 0.00000 0.00000 0.00000 0.00000 0.00000
  -2   4   2  524.84    6.95   2 0.00000 0.00000 0.00000 0.00000 0.00000 0.00000
  -3   4   3  282.03    4.66   2 0.00000 0.00000 0.00000 0.00000 0.00000 0.00000
  -4   4   4  243.42    4.49   2 0.00000 0.00000 0.00000 0.00000 0.00000 0.00000
  -5   4   5   65.33    2.85   2 0.00000 0.00000 0.00000 0.00000 0.00000 0.00000
  -6   4   6  430.24    4.54  -1 0.00000 0.00000 0.00000 0.00000 0.00000 0.00000
  -1  -4   8  430.24    4.54   2 0.00000 0.00000 0.00000 0.00000 0.00000 0.00000
  -7   4   7  383.51    4.44  -1 0.00000 0.00000 0.00000 0.00000 0.00000 0.00000
  -1  -4   9  383.51    4.44   2 0.00000 0.00000 0.00000 0.00000 0.00000 0.00000
  -9   4   9  357.87    5.54   2 0.00000 0.00000 0.00000 0.00000 0.00000 0.00000
 -10   4  10   27.25    2.79   2 0.00000 0.00000 0.00000 0.00000 0.00000 0.00000
 -11   4  11    4.09    1.97   2 0.00000 0.00000 0.00000 0.00000 0.00000 0.00000
 -12   4  12  139.68    6.19   2 0.00000 0.00000 0.00000 0.00000 0.00000 0.00000
  11   3 -10   25.50    1.83   2 0.00000 0.00000 0.00000 0.00000 0.00000 0.00000
  10   3  -9   16.26    1.41   2 0.00000 0.00000 0.00000 0.00000 0.00000 0.00000
   9   3  -8   37.92    4.12  -1 0.00000 0.00000 0.00000 0.00000 0.00000 0.00000
   0   3  10   37.92    4.12   2 0.00000 0.00000 0.00000 0.00000 0.00000 0.00000
   8   3  -7  164.06    4.44  -1 0.00000 0.00000 0.00000 0.00000 0.00000 0.00000
   0   3   9  164.06    4.44   2 0.00000 0.00000 0.00000 0.00000 0.00000 0.00000
   7   3  -6   22.24    3.28  -1 0.00000 0.00000 0.00000 0.00000 0.00000 0.00000
   0   3   8   22.24    3.28   2 0.00000 0.00000 0.00000 0.00000 0.00000 0.00000
   6   3  -5  238.20    2.39   2 0.00000 0.00000 0.00000 0.00000 0.00000 0.00000
   5   3  -4  821.01    5.58   2 0.00000 0.00000 0.00000 0.00000 0.00000 0.00000
   4   3  -3   46.57    0.84   2 0.00000 0.00000 0.00000 0.00000 0.00000 0.00000
   3   3  -2   17.03    0.71   2 0.00000 0.00000 0.00000 0.00000 0.00000 0.00000
   2   3  -1    0.81    0.68   2 0.00000 0.00000 0.00000 0.00000 0.00000 0.00000
   1   3   0  302.13    6.25  -1 0.00000 0.00000 0.00000 0.00000 0.00000 0.00000
   1   3   0  302.13    6.25   2 0.00000 0.00000 0.00000 0.00000 0.00000 0.00000
   0   3   1 1932.25   12.97  -1 0.00000 0.00000 0.00000 0.00000 0.00000 0.00000
   1   3  -1 1932.25   12.97   2 0.00000 0.00000 0.00000 0.00000 0.00000 0.00000
  -1   3   2   76.06    1.46   2 0.00000 0.00000 0.00000 0.00000 0.00000 0.00000
  -2   3   3    4.40    0.75   2 0.00000 0.00000 0.00000 0.00000 0.00000 0.00000
  -3   3   4  363.84    5.52   2 0.00000 0.00000 0.00000 0.00000 0.00000 0.00000
  -4   3   5    4.96    0.92   2 0.00000 0.00000 0.00000 0.00000 0.00000 0.00000
  -5   3   6  191.75    3.18   2 0.00000 0.00000 0.00000 0.00000 0.00000 0.00000
  -6   3   7  108.31    2.75   2 0.00000 0.00000 0.00000 0.00000 0.00000 0.00000
  -7   3   8  343.42    4.46  -1 0.00000 0.00000 0.00000 0.00000 0.00000 0.00000
  -2  -3  10  343.42    4.46   2 0.00000 0.00000 0.00000 0.00000 0.00000 0.00000
  -8   3   9  131.38    3.69  -1 0.00000 0.00000 0.00000 0.00000 0.00000 0.00000
  -2  -3  11  131.38    3.69   2 0.00000 0.00000 0.00000 0.00000 0.00000 0.00000
  -9   3  10  369.40    6.37  -1 0.00000 0.00000 0.00000 0.00000 0.00000 0.00000
  -2  -3  12  369.40    6.37   2 0.00000 0.00000 0.00000 0.00000 0.00000 0.00000
 -10   3  11   56.42    4.60   2 0.00000 0.00000 0.00000 0.00000 0.00000 0.00000
 -11   3  12   60.63    4.83   2 0.00000 0.00000 0.00000 0.00000 0.00000 0.00000
 -12   3  13   53.17    3.92   2 0.00000 0.00000 0.00000 0.00000 0.00000 0.00000
  11   2  -9   44.38    1.91   2 0.00000 0.00000 0.00000 0.00000 0.00000 0.00000
  10   2  -8   77.55    2.08   2 0.00000 0.00000 0.00000 0.00000 0.00000 0.00000
   9   2  -7   93.37    2.08   2 0.00000 0.00000 0.00000 0.00000 0.00000 0.00000
   8   2  -6    0.41    0.76   2 0.00000 0.00000 0.00000 0.00000 0.00000 0.00000
   8   2  -6   -3.93    3.00  -1 0.00000 0.00000 0.00000 0.00000 0.00000 0.00000
   1   2   8   -3.93    3.00   2 0.00000 0.00000 0.00000 0.00000 0.00000 0.00000
   7   2  -5   97.85    2.55  -1 0.00000 0.00000 0.00000 0.00000 0.00000 0.00000
   1   2   7   97.85    2.55   2 0.00000 0.00000 0.00000 0.00000 0.00000 0.00000
   6   2  -4  230.75    3.29  -1 0.00000 0.00000 0.00000 0.00000 0.00000 0.00000
   1   2   6  230.75    3.29   2 0.00000 0.00000 0.00000 0.00000 0.00000 0.00000
   5   2  -3  863.89   14.91  -1 0.00000 0.00000 0.00000 0.00000 0.00000 0.00000
   1   2   5  863.89   14.91   2 0.00000 0.00000 0.00000 0.00000 0.00000 0.00000
   4   2  -2   52.46    1.38   2 0.00000 0.00000 0.00000 0.00000 0.00000 0.00000
   3   2  -1  174.10    2.23   2 0.00000 0.00000 0.00000 0.00000 0.00000 0.00000
   2   2   0 2553.52   18.08   2 0.00000 0.00000 0.00000 0.00000 0.00000 0.00000
   1   2   1    1.61    0.56   2 0.00000 0.00000 0.00000 0.00000 0.00000 0.00000
   0   2   2  243.71    4.53  -1 0.00000 0.00000 0.00000 0.00000 0.00000 0.00000
   2   2  -2  243.71    4.53   2 0.00000 0.00000 0.00000 0.00000 0.00000 0.00000
  -1   2   3  852.99   10.57  -1 0.00000 0.00000 0.00000 0.00000 0.00000 0.00000
   2   2  -3  852.99   10.57   2 0.00000 0.00000 0.00000 0.00000 0.00000 0.00000
  -2   2   4   59.21    2.00  -1 0.00000 0.00000 0.00000 0.00000 0.00000 0.00000
  -2  -2   4   59.21    2.00   2 0.00000 0.00000 0.00000 0.00000 0.00000 0.00000
  -3   2   5  784.17    5.43   2 0.00000 0.00000 0.00000 0.00000 0.00000 0.00000
  -4   2   6   84.99    1.56   2 0.00000 0.00000 0.00000 0.00000 0.00000 0.00000
  -5   2   7   -0.13    0.69   2 0.00000 0.00000 0.00000 0.00000 0.00000 0.00000
  -6   2   8    0.74    1.72   2 0.00000 0.00000 0.00000 0.00000 0.00000 0.00000
  -7   2   9  168.31    5.27   2 0.00000 0.00000 0.00000 0.00000 0.00000 0.00000
  -8   2  10   59.26    3.80  -1 0.00000 0.00000 0.00000 0.00000 0.00000 0.00000
  -3  -2  12   59.26    3.80   2 0.00000 0.00000 0.00000 0.00000 0.00000 0.00000
  -9   2  11   39.06    3.03  -1 0.00000 0.00000 0.00000 0.00000 0.00000 0.00000
  -3  -2  13   39.06    3.03   2 0.00000 0.00000 0.00000 0.00000 0.00000 0.00000
 -10   2  12  333.36    6.50  -1 0.00000 0.00000 0.00000 0.00000 0.00000 0.00000
  -3  -2  14  333.36    6.50   2 0.00000 0.00000 0.00000 0.00000 0.00000 0.00000
 -11   2  13   43.02    3.58   2 0.00000 0.00000 0.00000 0.00000 0.00000 0.00000
  12   1  -9   -7.20    5.65  -1 0.00000 0.00000 0.00000 0.00000 0.00000 0.00000
   1   1  13   -7.20    5.65   2 0.00000 0.00000 0.00000 0.00000 0.00000 0.00000
  11   1  -8   56.72    1.94   2 0.00000 0.00000 0.00000 0.00000 0.00000 0.00000
  10   1  -7   96.71    2.11   2 0.00000 0.00000 0.00000 0.00000 0.00000 0.00000
   9   1  -6   31.40    1.53   2 0.00000 0.00000 0.00000 0.00000 0.00000 0.00000
   8   1  -5    3.85    0.76   2 0.00000 0.00000 0.00000 0.00000 0.00000 0.00000
   7   1  -4  315.33    3.05   2 0.00000 0.00000 0.00000 0.00000 0.00000 0.00000
   6   1  -3  279.44    3.68  -1 0.00000 0.00000 0.00000 0.00000 0.00000 0.00000
   2   1   5  279.44    3.68   2 0.00000 0.00000 0.00000 0.00000 0.00000 0.00000
   5   1  -2  539.57    6.25  -1 0.00000 0.00000 0.00000 0.00000 0.00000 0.00000
   2   1   4  539.57    6.25   2 0.00000 0.00000 0.00000 0.00000 0.00000 0.00000
   4   1  -1  104.93    4.84  -1 0.00000 0.00000 0.00000 0.00000 0.00000 0.00000
   2   1   3  104.93    4.84   2 0.00000 0.00000 0.00000 0.00000 0.00000 0.00000
   3   1   0   14.81    1.11   2 0.00000 0.00000 0.00000 0.00000 0.00000 0.00000
   2   1   1 1037.24    9.71   2 0.00000 0.00000 0.00000 0.00000 0.00000 0.00000
   1   1   2  195.10    2.13   2 0.00000 0.00000 0.00000 0.00000 0.00000 0.00000
   0   1   3  126.30    1.68   2 0.00000 0.00000 0.00000 0.00000 0.00000 0.00000
  -1   1   4 2469.16   17.55   2 0.00000 0.00000 0.00000 0.00000 0.00000 0.00000
  -2   1   5   61.32    2.94  -1 0.00000 0.00000 0.00000 0.00000 0.00000 0.00000
  -3  -1   5   61.32    2.94   2 0.00000 0.00000 0.00000 0.00000 0.00000 0.00000
  -3   1   6  940.31    9.12  -1 0.00000 0.00000 0.00000 0.00000 0.00000 0.00000
  -3  -1   6  940.31    9.12   2 0.00000 0.00000 0.00000 0.00000 0.00000 0.00000
  -4   1   7  302.29    5.97  -1 0.00000 0.00000 0.00000 0.00000 0.00000 0.00000
  -3  -1   7  302.29    5.97   2 0.00000 0.00000 0.00000 0.00000 0.00000 0.00000
  -5   1   8  630.57    5.75   2 0.00000 0.00000 0.00000 0.00000 0.00000 0.00000
  -6   1   9   58.85    2.82   2 0.00000 0.00000 0.00000 0.00000 0.00000 0.00000
  -7   1  10   75.09    3.14   2 0.00000 0.00000 0.00000 0.00000 0.00000 0.00000
  -8   1  11    5.62    1.87   2 0.00000 0.00000 0.00000 0.00000 0.00000 0.00000
 -10   1  13  363.29    6.74  -1 0.00000 0.00000 0.00000 0.00000 0.00000 0.00000
  -4  -1  15  363.29    6.74   2 0.00000 0.00000 0.00000 0.00000 0.00000 0.00000
 -11   1  14   17.89    3.63  -1 0.00000 0.00000 0.00000 0.00000 0.00000 0.00000
  -4  -1  16   17.89    3.63   2 0.00000 0.00000 0.00000 0.00000 0.00000 0.00000
  11   0  -7  389.55    8.63  -1 0.00000 0.00000 0.00000 0.00000 0.00000 0.00000
   2   0  11  389.55    8.63   2 0.00000 0.00000 0.00000 0.00000 0.00000 0.00000
  10   0  -6   80.91    2.52   2 0.00000 0.00000 0.00000 0.00000 0.00000 0.00000
   9   0  -5   51.41    2.05   2 0.00000 0.00000 0.00000 0.00000 0.00000 0.00000
   8   0  -4   29.77    1.72   2 0.00000 0.00000 0.00000 0.00000 0.00000 0.00000
   7   0  -3  962.08    6.33   2 0.00000 0.00000 0.00000 0.00000 0.00000 0.00000
   6   0  -2    3.22    0.46   2 0.00000 0.00000 0.00000 0.00000 0.00000 0.00000
   5   0  -1   94.22    2.25   2 0.00000 0.00000 0.00000 0.00000 0.00000 0.00000
   4   0   0 1835.59   16.98  -1 0.00000 0.00000 0.00000 0.00000 0.00000 0.00000
   3   0   2 1835.59   16.98   2 0.00000 0.00000 0.00000 0.00000 0.00000 0.00000
   3   0   1    2.01    0.69   2 0.00000 0.00000 0.00000 0.00000 0.00000 0.00000
   2   0   2   94.45    2.07   2 0.00000 0.00000 0.00000 0.00000 0.00000 0.00000
   1   0   3  599.85    4.99   2 0.00000 0.00000 0.00000 0.00000 0.00000 0.00000
   0   0   4   13.52    1.02   2 0.00000 0.00000 0.00000 0.00000 0.00000 0.00000
  -1   0   5  697.58    4.90   2 0.00000 0.00000 0.00000 0.00000 0.00000 0.00000
  -2   0   6  540.09    4.16   2 0.00000 0.00000 0.00000 0.00000 0.00000 0.00000
  -3   0   7   60.31    2.79  -1 0.00000 0.00000 0.00000 0.00000 0.00000 0.00000
  -4   0   7   60.31    2.79   2 0.00000 0.00000 0.00000 0.00000 0.00000 0.00000
  -4   0   8  399.24    5.26  -1 0.00000 0.00000 0.00000 0.00000 0.00000 0.00000
  -4   0   8  399.24    5.26   2 0.00000 0.00000 0.00000 0.00000 0.00000 0.00000
  -5   0   9  562.72    7.11  -1 0.00000 0.00000 0.00000 0.00000 0.00000 0.00000
  -4   0   9  562.72    7.11   2 0.00000 0.00000 0.00000 0.00000 0.00000 0.00000
  -6   0  10   31.75    2.60   2 0.00000 0.00000 0.00000 0.00000 0.00000 0.00000
  -7   0  11   10.62    1.92   2 0.00000 0.00000 0.00000 0.00000 0.00000 0.00000
  -8   0  12  172.08    4.37   2 0.00000 0.00000 0.00000 0.00000 0.00000 0.00000
  -9   0  13   29.55    3.13   2 0.00000 0.00000 0.00000 0.00000 0.00000 0.00000
 -10   0  14  109.74    4.32   2 0.00000 0.00000 0.00000 0.00000 0.00000 0.00000
  13  -1  -8   61.44    2.70   2 0.00000 0.00000 0.00000 0.00000 0.00000 0.00000
  12  -1  -7   50.32    2.43   2 0.00000 0.00000 0.00000 0.00000 0.00000 0.00000
  12  -1  -7  117.64    6.52  -1 0.00000 0.00000 0.00000 0.00000 0.00000 0.00000
   3  -1  11  117.64    6.52   2 0.00000 0.00000 0.00000 0.00000 0.00000 0.00000
  11  -1  -6  358.57    8.26  -1 0.00000 0.00000 0.00000 0.00000 0.00000 0.00000
   3  -1  10  358.57    8.26   2 0.00000 0.00000 0.00000 0.00000 0.00000 0.00000
  10  -1  -5  212.61    6.17  -1 0.00000 0.00000 0.00000 0.00000 0.00000 0.00000
   3  -1   9  212.61    6.17   2 0.00000 0.00000 0.00000 0.00000 0.00000 0.00000
   9  -1  -4  449.79    9.00  -1 0.00000 0.00000 0.00000 0.00000 0.00000 0.00000
   3  -1   8  449.79    9.00   2 0.00000 0.00000 0.00000 0.00000 0.00000 0.00000
   8  -1  -3   68.47    1.35   2 0.00000 0.00000 0.00000 0.00000 0.00000 0.00000
   7  -1  -2  200.07    1.95   2 0.00000 0.00000 0.00000 0.00000 0.00000 0.00000
   6  -1  -1   96.12    1.75   2 0.00000 0.00000 0.00000 0.00000 0.00000 0.00000
   5  -1   0  122.69    2.52   2 0.00000 0.00000 0.00000 0.00000 0.00000 0.00000
   4  -1   1 4739.49   38.94   2 0.00000 0.00000 0.00000 0.00000 0.00000 0.00000
   3  -1   2   83.72    2.27  -1 0.00000 0.00000 0.00000 0.00000 0.00000 0.00000
   4  -1   0   83.72    2.27   2 0.00000 0.00000 0.00000 0.00000 0.00000 0.00000
   2  -1   3   33.75    1.25  -1 0.00000 0.00000 0.00000 0.00000 0.00000 0.00000
   4  -1  -1   33.75    1.25   2 0.00000 0.00000 0.00000 0.00000 0.00000 0.00000
   1  -1   4  272.95    2.62   2 0.00000 0.00000 0.00000 0.00000 0.00000 0.00000
   0  -1   5   60.45    1.24   2 0.00000 0.00000 0.00000 0.00000 0.00000 0.00000
  -1  -1   6  550.61    4.78   2 0.00000 0.00000 0.00000 0.00000 0.00000 0.00000
  -2  -1   7    0.02    0.81   2 0.00000 0.00000 0.00000 0.00000 0.00000 0.00000
  -3  -1   8  568.65    5.35   2 0.00000 0.00000 0.00000 0.00000 0.00000 0.00000
  -4  -1   9  763.07   11.98  -1 0.00000 0.00000 0.00000 0.00000 0.00000 0.00000
  -5   1   9  763.07   11.98   2 0.00000 0.00000 0.00000 0.00000 0.00000 0.00000
  -5  -1  10  304.87    5.23  -1 0.00000 0.00000 0.00000 0.00000 0.00000 0.00000
  -5   1  10  304.87    5.23   2 0.00000 0.00000 0.00000 0.00000 0.00000 0.00000
  -6  -1  11   68.31    3.64  -1 0.00000 0.00000 0.00000 0.00000 0.00000 0.00000
  -5   1  11   68.31    3.64   2 0.00000 0.00000 0.00000 0.00000 0.00000 0.00000
  -7  -1  12    3.51    1.82   2 0.00000 0.00000 0.00000 0.00000 0.00000 0.00000
  -8  -1  13  191.16    4.73   2 0.00000 0.00000 0.00000 0.00000 0.00000 0.00000
  -9  -1  14   22.48    2.62   2 0.00000 0.00000 0.00000 0.00000 0.00000 0.00000
  13  -2  -7  174.15    3.68   2 0.00000 0.00000 0.00000 0.00000 0.00000 0.00000
  12  -2  -6   84.49    2.76   2 0.00000 0.00000 0.00000 0.00000 0.00000 0.00000
  11  -2  -5    0.40    1.20   2 0.00000 0.00000 0.00000 0.00000 0.00000 0.00000
  10  -2  -4   -5.94    3.97  -1 0.00000 0.00000 0.00000 0.00000 0.00000 0.00000
   4  -2   8   -5.94    3.97   2 0.00000 0.00000 0.00000 0.00000 0.00000 0.00000
   9  -2  -3  696.96   11.38  -1 0.00000 0.00000 0.00000 0.00000 0.00000 0.00000
   4  -2   7  696.96   11.38   2 0.00000 0.00000 0.00000 0.00000 0.00000 0.00000
   8  -2  -2  261.66    6.55  -1 0.00000 0.00000 0.00000 0.00000 0.00000 0.00000
   4  -2   6  261.66    6.55   2 0.00000 0.00000 0.00000 0.00000 0.00000 0.00000
   7  -2  -1   56.90    1.11   2 0.00000 0.00000 0.00000 0.00000 0.00000 0.00000
   6  -2   0   43.30    0.97   2 0.00000 0.00000 0.00000 0.00000 0.00000 0.00000
   5  -2   1    5.06    0.65   2 0.00000 0.00000 0.00000 0.00000 0.00000 0.00000
   4  -2   2  867.96    7.85   2 0.00000 0.00000 0.00000 0.00000 0.00000 0.00000
   3  -2   3  251.10    2.33   2 0.00000 0.00000 0.00000 0.00000 0.00000 0.00000
   2  -2   4   71.08    3.07  -1 0.00000 0.00000 0.00000 0.00000 0.00000 0.00000
   5  -2  -2   71.08    3.07   2 0.00000 0.00000 0.00000 0.00000 0.00000 0.00000
   1  -2   5 1736.53   14.60  -1 0.00000 0.00000 0.00000 0.00000 0.00000 0.00000
   5  -2  -3 1736.53   14.60   2 0.00000 0.00000 0.00000 0.00000 0.00000 0.00000
   0  -2   6  191.58    4.88  -1 0.00000 0.00000 0.00000 0.00000 0.00000 0.00000
  -5   2   4  191.58    4.88   2 0.00000 0.00000 0.00000 0.00000 0.00000 0.00000
  -1  -2   7  601.42    5.32   2 0.00000 0.00000 0.00000 0.00000 0.00000 0.00000
  -2  -2   8   42.91    1.78   2 0.00000 0.00000 0.00000 0.00000 0.00000 0.00000
  -3  -2   9  216.56    3.19   2 0.00000 0.00000 0.00000 0.00000 0.00000 0.00000
  -4  -2  10  108.43    2.65   2 0.00000 0.00000 0.00000 0.00000 0.00000 0.00000
  -5  -2  11   99.00    3.27   2 0.00000 0.00000 0.00000 0.00000 0.00000 0.00000
  -6  -2  12  397.53    6.49  -1 0.00000 0.00000 0.00000 0.00000 0.00000 0.00000
  -6   2  12  397.53    6.49   2 0.00000 0.00000 0.00000 0.00000 0.00000 0.00000
  -7  -2  13   88.66    3.83  -1 0.00000 0.00000 0.00000 0.00000 0.00000 0.00000
  -6   2  13   88.66    3.83   2 0.00000 0.00000 0.00000 0.00000 0.00000 0.00000
  -8  -2  14  342.11   10.53  -1 0.00000 0.00000 0.00000 0.00000 0.00000 0.00000
  -6   2  14  342.11   10.53   2 0.00000 0.00000 0.00000 0.00000 0.00000 0.00000
  -9  -2  15    3.82    2.30   2 0.00000 0.00000 0.00000 0.00000 0.00000 0.00000
  13  -3  -6  140.54    3.38   2 0.00000 0.00000 0.00000 0.00000 0.00000 0.00000
  12  -3  -5   52.94    2.41   2 0.00000 0.00000 0.00000 0.00000 0.00000 0.00000
  11  -3  -4   15.52    1.45   2 0.00000 0.00000 0.00000 0.00000 0.00000 0.00000
  10  -3  -3   43.06    1.83   2 0.00000 0.00000 0.00000 0.00000 0.00000 0.00000
   9  -3  -2  309.95    7.66  -1 0.00000 0.00000 0.00000 0.00000 0.00000 0.00000
   5  -3   6  309.95    7.66   2 0.00000 0.00000 0.00000 0.00000 0.00000 0.00000
   8  -3  -1   18.98    3.30  -1 0.00000 0.00000 0.00000 0.00000 0.00000 0.00000
   5  -3   5   18.98    3.30   2 0.00000 0.00000 0.00000 0.00000 0.00000 0.00000
   7  -3   0   42.26    3.57  -1 0.00000 0.00000 0.00000 0.00000 0.00000 0.00000
   5  -3   4   42.26    3.57   2 0.00000 0.00000 0.00000 0.00000 0.00000 0.00000
   6  -3   1  450.05    2.67   2 0.00000 0.00000 0.00000 0.00000 0.00000 0.00000
   5  -3   2    5.83    0.59   2 0.00000 0.00000 0.00000 0.00000 0.00000 0.00000
   4  -3   3   23.98    1.09   2 0.00000 0.00000 0.00000 0.00000 0.00000 0.00000
   3  -3   4   68.80    1.43   2 0.00000 0.00000 0.00000 0.00000 0.00000 0.00000
   2  -3   5  263.62    2.18   2 0.00000 0.00000 0.00000 0.00000 0.00000 0.00000
   1  -3   6 1955.49   23.72  -1 0.00000 0.00000 0.00000 0.00000 0.00000 0.00000
  -6   3   4 1955.49   23.72   2 0.00000 0.00000 0.00000 0.00000 0.00000 0.00000
   0  -3   7   14.28    1.85  -1 0.00000 0.00000 0.00000 0.00000 0.00000 0.00000
  -6   3   5   14.28    1.85   2 0.00000 0.00000 0.00000 0.00000 0.00000 0.00000
  -1  -3   8  111.97    3.03  -1 0.00000 0.00000 0.00000 0.00000 0.00000 0.00000
  -6   3   6  111.97    3.03   2 0.00000 0.00000 0.00000 0.00000 0.00000 0.00000
  -2  -3   9  521.15    5.24   2 0.00000 0.00000 0.00000 0.00000 0.00000 0.00000
  -3  -3  10   29.54    2.03   2 0.00000 0.00000 0.00000 0.00000 0.00000 0.00000
  -4  -3  11    7.75    1.42   2 0.00000 0.00000 0.00000 0.00000 0.00000 0.00000
  -5  -3  12   -0.52    1.39   2 0.00000 0.00000 0.00000 0.00000 0.00000 0.00000
  -6  -3  13  182.57    3.74   2 0.00000 0.00000 0.00000 0.00000 0.00000 0.00000
  -7  -3  14  121.48    7.32  -1 0.00000 0.00000 0.00000 0.00000 0.00000 0.00000
  -7   3  14  121.48    7.32   2 0.00000 0.00000 0.00000 0.00000 0.00000 0.00000
  -8  -3  15  113.65    6.87  -1 0.00000 0.00000 0.00000 0.00000 0.00000 0.00000
  -7   3  15  113.65    6.87   2 0.00000 0.00000 0.00000 0.00000 0.00000 0.00000
  13  -4  -5  269.82    8.49  -1 0.00000 0.00000 0.00000 0.00000 0.00000 0.00000
   5  -4  11  269.82    8.49   2 0.00000 0.00000 0.00000 0.00000 0.00000 0.00000
  12  -4  -4  112.60    2.61   2 0.00000 0.00000 0.00000 0.00000 0.00000 0.00000
  11  -4  -3  165.63    2.88   2 0.00000 0.00000 0.00000 0.00000 0.00000 0.00000
  10  -4  -2  130.20    2.55   2 0.00000 0.00000 0.00000 0.00000 0.00000 0.00000
   9  -4  -1   60.77    1.89   2 0.00000 0.00000 0.00000 0.00000 0.00000 0.00000
   8  -4   0   11.74    1.14   2 0.00000 0.00000 0.00000 0.00000 0.00000 0.00000
   7  -4   1   42.68    1.84  -1 0.00000 0.00000 0.00000 0.00000 0.00000 0.00000
   6  -4   3   42.68    1.84   2 0.00000 0.00000 0.00000 0.00000 0.00000 0.00000
   6  -4   2 1455.04   10.46  -1 0.00000 0.00000 0.00000 0.00000 0.00000 0.00000
   6  -4   2 1455.04   10.46   2 0.00000 0.00000 0.00000 0.00000 0.00000 0.00000
   5  -4   3   10.03    0.87   2 0.00000 0.00000 0.00000 0.00000 0.00000 0.00000
   4  -4   4    4.10    0.58   2 0.00000 0.00000 0.00000 0.00000 0.00000 0.00000
   3  -4   5  278.98    2.57   2 0.00000 0.00000 0.00000 0.00000 0.00000 0.00000
   2  -4   6  255.14    2.60   2 0.00000 0.00000 0.00000 0.00000 0.00000 0.00000
   1  -4   7  519.23    4.21   2 0.00000 0.00000 0.00000 0.00000 0.00000 0.00000
   0  -4   8   27.16    1.61   2 0.00000 0.00000 0.00000 0.00000 0.00000 0.00000
  -1  -4   9  389.76    5.39  -1 0.00000 0.00000 0.00000 0.00000 0.00000 0.00000
  -7   4   7  389.76    5.39   2 0.00000 0.00000 0.00000 0.00000 0.00000 0.00000
  -2  -4  10  672.93    7.78  -1 0.00000 0.00000 0.00000 0.00000 0.00000 0.00000
  -7   4   8  672.93    7.78   2 0.00000 0.00000 0.00000 0.00000 0.00000 0.00000
  -3  -4  11  104.16    2.74   2 0.00000 0.00000 0.00000 0.00000 0.00000 0.00000
  -3  -4  11  278.01    7.76  -1 0.00000 0.00000 0.00000 0.00000 0.00000 0.00000
  -7   4   9  278.01    7.76   2 0.00000 0.00000 0.00000 0.00000 0.00000 0.00000
  -4  -4  12    4.77    1.45   2 0.00000 0.00000 0.00000 0.00000 0.00000 0.00000
  -5  -4  13    4.88    1.57   2 0.00000 0.00000 0.00000 0.00000 0.00000 0.00000
  -6  -4  14  160.44    3.68   2 0.00000 0.00000 0.00000 0.00000 0.00000 0.00000
  -7  -4  15   16.63    2.09   2 0.00000 0.00000 0.00000 0.00000 0.00000 0.00000
  14  -5  -5  181.89    7.82  -1 0.00000 0.00000 0.00000 0.00000 0.00000 0.00000
   6  -5  11  181.89    7.82   2 0.00000 0.00000 0.00000 0.00000 0.00000 0.00000
  13  -5  -4   81.89    5.04  -1 0.00000 0.00000 0.00000 0.00000 0.00000 0.00000
   6  -5  10   81.89    5.04   2 0.00000 0.00000 0.00000 0.00000 0.00000 0.00000
  12  -5  -3  120.01    6.19  -1 0.00000 0.00000 0.00000 0.00000 0.00000 0.00000
   6  -5   9  120.01    6.19   2 0.00000 0.00000 0.00000 0.00000 0.00000 0.00000
  11  -5  -2  284.85    3.83   2 0.00000 0.00000 0.00000 0.00000 0.00000 0.00000
  10  -5  -1   36.91    1.85   2 0.00000 0.00000 0.00000 0.00000 0.00000 0.00000
   9  -5   0  222.17    3.12   2 0.00000 0.00000 0.00000 0.00000 0.00000 0.00000
   8  -5   1   97.53    2.15   2 0.00000 0.00000 0.00000 0.00000 0.00000 0.00000
   7  -5   2   -2.82    1.57   2 0.00000 0.00000 0.00000 0.00000 0.00000 0.00000
   6  -5   3  825.66   12.77  -1 0.00000 0.00000 0.00000 0.00000 0.00000 0.00000
   7  -5   1  825.66   12.77   2 0.00000 0.00000 0.00000 0.00000 0.00000 0.00000
   5  -5   4   70.21    1.78  -1 0.00000 0.00000 0.00000 0.00000 0.00000 0.00000
   7  -5   0   70.21    1.78   2 0.00000 0.00000 0.00000 0.00000 0.00000 0.00000
   3  -5   6  969.66    9.47   2 0.00000 0.00000 0.00000 0.00000 0.00000 0.00000
   2  -5   7   14.08    0.95   2 0.00000 0.00000 0.00000 0.00000 0.00000 0.00000
   1  -5   8   32.85    1.49   2 0.00000 0.00000 0.00000 0.00000 0.00000 0.00000
   0  -5   9  208.49    2.73   2 0.00000 0.00000 0.00000 0.00000 0.00000 0.00000
  -1  -5  10  137.35    2.43   2 0.00000 0.00000 0.00000 0.00000 0.00000 0.00000
  -2  -5  11   89.94    3.74  -1 0.00000 0.00000 0.00000 0.00000 0.00000 0.00000
  -8   5   9   89.94    3.74   2 0.00000 0.00000 0.00000 0.00000 0.00000 0.00000
  -3  -5  12  106.21    5.64  -1 0.00000 0.00000 0.00000 0.00000 0.00000 0.00000
  -8   5  10  106.21    5.64   2 0.00000 0.00000 0.00000 0.00000 0.00000 0.00000
  -4  -5  13  142.06    7.54  -1 0.00000 0.00000 0.00000 0.00000 0.00000 0.00000
  -8   5  11  142.06    7.54   2 0.00000 0.00000 0.00000 0.00000 0.00000 0.00000
  -5  -5  14   14.41    1.60   2 0.00000 0.00000 0.00000 0.00000 0.00000 0.00000
  -6  -5  15  119.90    3.53   2 0.00000 0.00000 0.00000 0.00000 0.00000 0.00000
  14  -6  -4   53.81    4.66   2 0.00000 0.00000 0.00000 0.00000 0.00000 0.00000
  13  -6  -3   67.84    6.42  -1 0.00000 0.00000 0.00000 0.00000 0.00000 0.00000
   7  -6   9   67.84    6.42   2 0.00000 0.00000 0.00000 0.00000 0.00000 0.00000
  12  -6  -2  136.88    6.02  -1 0.00000 0.00000 0.00000 0.00000 0.00000 0.00000
   7  -6   8  136.88    6.02   2 0.00000 0.00000 0.00000 0.00000 0.00000 0.00000
  11  -6  -1  605.66   11.78  -1 0.00000 0.00000 0.00000 0.00000 0.00000 0.00000
   7  -6   7  605.66   11.78   2 0.00000 0.00000 0.00000 0.00000 0.00000 0.00000
  10  -6   0    0.04    0.99   2 0.00000 0.00000 0.00000 0.00000 0.00000 0.00000
  10  -6   0    3.01    5.05  -1 0.00000 0.00000 0.00000 0.00000 0.00000 0.00000
   7  -6   6    3.01    5.05   2 0.00000 0.00000 0.00000 0.00000 0.00000 0.00000
   9  -6   1    7.23    1.34   2 0.00000 0.00000 0.00000 0.00000 0.00000 0.00000
   8  -6   2   53.57    3.79   2 0.00000 0.00000 0.00000 0.00000 0.00000 0.00000
   7  -6   3   46.02    3.58   2 0.00000 0.00000 0.00000 0.00000 0.00000 0.00000
   6  -6   4  287.53    4.37   2 0.00000 0.00000 0.00000 0.00000 0.00000 0.00000
   5  -6   5  616.29    6.98   2 0.00000 0.00000 0.00000 0.00000 0.00000 0.00000
   4  -6   6 1190.45    9.41  -1 0.00000 0.00000 0.00000 0.00000 0.00000 0.00000
   8  -6  -2 1190.45    9.41   2 0.00000 0.00000 0.00000 0.00000 0.00000 0.00000
   3  -6   7  751.80    6.69  -1 0.00000 0.00000 0.00000 0.00000 0.00000 0.00000
  -8   6   3  751.80    6.69   2 0.00000 0.00000 0.00000 0.00000 0.00000 0.00000
   2  -6   8   95.53    2.35   2 0.00000 0.00000 0.00000 0.00000 0.00000 0.00000
   1  -6   9   92.11    2.45   2 0.00000 0.00000 0.00000 0.00000 0.00000 0.00000
   0  -6  10  315.57    4.18   2 0.00000 0.00000 0.00000 0.00000 0.00000 0.00000
  -1  -6  11   34.23    2.16   2 0.00000 0.00000 0.00000 0.00000 0.00000 0.00000
  -2  -6  12   17.05    1.67   2 0.00000 0.00000 0.00000 0.00000 0.00000 0.00000
  -3  -6  13   35.74    6.51  -1 0.00000 0.00000 0.00000 0.00000 0.00000 0.00000
  -9   6  11   35.74    6.51   2 0.00000 0.00000 0.00000 0.00000 0.00000 0.00000
  -4  -6  14  390.40   10.31  -1 0.00000 0.00000 0.00000 0.00000 0.00000 0.00000
  -9   6  12  390.40   10.31   2 0.00000 0.00000 0.00000 0.00000 0.00000 0.00000
  -5  -6  15   -2.89    5.83  -1 0.00000 0.00000 0.00000 0.00000 0.00000 0.00000
  -9   6  13   -2.89    5.83   2 0.00000 0.00000 0.00000 0.00000 0.00000 0.00000
  13  -7  -2  222.89    3.71   2 0.00000 0.00000 0.00000 0.00000 0.00000 0.00000
  12  -7  -1   71.85    2.42   2 0.00000 0.00000 0.00000 0.00000 0.00000 0.00000
  11  -7   0  337.70    8.83  -1 0.00000 0.00000 0.00000 0.00000 0.00000 0.00000
   8  -7   6  337.70    8.83   2 0.00000 0.00000 0.00000 0.00000 0.00000 0.00000
  10  -7   1   40.73    4.12  -1 0.00000 0.00000 0.00000 0.00000 0.00000 0.00000
   8  -7   5   40.73    4.12   2 0.00000 0.00000 0.00000 0.00000 0.00000 0.00000
   9  -7   2   32.27    5.03  -1 0.00000 0.00000 0.00000 0.00000 0.00000 0.00000
   8  -7   4   32.27    5.03   2 0.00000 0.00000 0.00000 0.00000 0.00000 0.00000
   8  -7   3  217.97    6.28   2 0.00000 0.00000 0.00000 0.00000 0.00000 0.00000
   7  -7   4   20.42    3.33   2 0.00000 0.00000 0.00000 0.00000 0.00000 0.00000
   6  -7   5   58.21    3.89   2 0.00000 0.00000 0.00000 0.00000 0.00000 0.00000
   5  -7   6  215.52    3.98   2 0.00000 0.00000 0.00000 0.00000 0.00000 0.00000
   4  -7   7   77.17    2.78   2 0.00000 0.00000 0.00000 0.00000 0.00000 0.00000
   3  -7   8  148.56    2.99  -1 0.00000 0.00000 0.00000 0.00000 0.00000 0.00000
  -9   7   4  148.56    2.99   2 0.00000 0.00000 0.00000 0.00000 0.00000 0.00000
   2  -7   9  570.20    7.19  -1 0.00000 0.00000 0.00000 0.00000 0.00000 0.00000
  -9   7   5  570.20    7.19   2 0.00000 0.00000 0.00000 0.00000 0.00000 0.00000
   1  -7  10  492.45    9.82  -1 0.00000 0.00000 0.00000 0.00000 0.00000 0.00000
  -9   7   6  492.45    9.82   2 0.00000 0.00000 0.00000 0.00000 0.00000 0.00000
   0  -7  11  210.79    3.60   2 0.00000 0.00000 0.00000 0.00000 0.00000 0.00000
  -1  -7  12   28.59    2.20   2 0.00000 0.00000 0.00000 0.00000 0.00000 0.00000
  -2  -7  13   16.94    1.77   2 0.00000 0.00000 0.00000 0.00000 0.00000 0.00000
  -3  -7  14   21.68    2.14   2 0.00000 0.00000 0.00000 0.00000 0.00000 0.00000
  -4  -7  15  239.59   10.12  -1 0.00000 0.00000 0.00000 0.00000 0.00000 0.00000
 -10   7  13  239.59   10.12   2 0.00000 0.00000 0.00000 0.00000 0.00000 0.00000
  13  -8  -1   82.85    3.18   2 0.00000 0.00000 0.00000 0.00000 0.00000 0.00000
  12  -8   0    2.11    1.53   2 0.00000 0.00000 0.00000 0.00000 0.00000 0.00000
  11  -8   1   84.51    3.00   2 0.00000 0.00000 0.00000 0.00000 0.00000 0.00000
  10  -8   2  460.78   10.43  -1 0.00000 0.00000 0.00000 0.00000 0.00000 0.00000
   9  -8   4  460.78   10.43   2 0.00000 0.00000 0.00000 0.00000 0.00000 0.00000
   9  -8   3   79.94    4.53  -1 0.00000 0.00000 0.00000 0.00000 0.00000 0.00000
   9  -8   3   79.94    4.53   2 0.00000 0.00000 0.00000 0.00000 0.00000 0.00000
   8  -8   4  895.66   14.79  -1 0.00000 0.00000 0.00000 0.00000 0.00000 0.00000
   9  -8   2  895.66   14.79   2 0.00000 0.00000 0.00000 0.00000 0.00000 0.00000
   7  -8   5   12.58    2.50   2 0.00000 0.00000 0.00000 0.00000 0.00000 0.00000
   6  -8   6   68.87    4.21   2 0.00000 0.00000 0.00000 0.00000 0.00000 0.00000
   5  -8   7   23.79    2.26   2 0.00000 0.00000 0.00000 0.00000 0.00000 0.00000
   4  -8   8  102.69    3.22   2 0.00000 0.00000 0.00000 0.00000 0.00000 0.00000
   3  -8   9    4.22    1.55   2 0.00000 0.00000 0.00000 0.00000 0.00000 0.00000
   2  -8  10  439.32    6.62  -1 0.00000 0.00000 0.00000 0.00000 0.00000 0.00000
 -10   8   6  439.32    6.62   2 0.00000 0.00000 0.00000 0.00000 0.00000 0.00000
   1  -8  11  507.13    7.11  -1 0.00000 0.00000 0.00000 0.00000 0.00000 0.00000
 -10   8   7  507.13    7.11   2 0.00000 0.00000 0.00000 0.00000 0.00000 0.00000
   0  -8  12   97.81    4.18  -1 0.00000 0.00000 0.00000 0.00000 0.00000 0.00000
 -10   8   8   97.81    4.18   2 0.00000 0.00000 0.00000 0.00000 0.00000 0.00000
  -1  -8  13   64.44    3.31   2 0.00000 0.00000 0.00000 0.00000 0.00000 0.00000
  -2  -8  14   40.50    3.21   2 0.00000 0.00000 0.00000 0.00000 0.00000 0.00000
  -3  -8  15   84.15    3.93   2 0.00000 0.00000 0.00000 0.00000 0.00000 0.00000
  13  -9   0   30.33    2.70   2 0.00000 0.00000 0.00000 0.00000 0.00000 0.00000
  12  -9   1   22.49    2.41   2 0.00000 0.00000 0.00000 0.00000 0.00000 0.00000
  11  -9   2    2.55    1.56   2 0.00000 0.00000 0.00000 0.00000 0.00000 0.00000
  10  -9   3  356.07    8.81   2 0.00000 0.00000 0.00000 0.00000 0.00000 0.00000
   9  -9   4   46.67    5.18  -1 0.00000 0.00000 0.00000 0.00000 0.00000 0.00000
  10  -9   2   46.67    5.18   2 0.00000 0.00000 0.00000 0.00000 0.00000 0.00000
   8  -9   5   43.28    4.13  -1 0.00000 0.00000 0.00000 0.00000 0.00000 0.00000
  10  -9   1   43.28    4.13   2 0.00000 0.00000 0.00000 0.00000 0.00000 0.00000
   7  -9   6  251.08    4.90  -1 0.00000 0.00000 0.00000 0.00000 0.00000 0.00000
  10  -9   0  251.08    4.90   2 0.00000 0.00000 0.00000 0.00000 0.00000 0.00000
   6  -9   7   36.09    3.98   2 0.00000 0.00000 0.00000 0.00000 0.00000 0.00000
   5  -9   8   77.49    3.03   2 0.00000 0.00000 0.00000 0.00000 0.00000 0.00000
   4  -9   9   30.91    2.59   2 0.00000 0.00000 0.00000 0.00000 0.00000 0.00000
   3  -9  10   65.42    3.07   2 0.00000 0.00000 0.00000 0.00000 0.00000 0.00000
   2  -9  11  167.66    4.26   2 0.00000 0.00000 0.00000 0.00000 0.00000 0.00000
   1  -9  12  273.60    6.09  -1 0.00000 0.00000 0.00000 0.00000 0.00000 0.00000
 -11   9   8  273.60    6.09   2 0.00000 0.00000 0.00000 0.00000 0.00000 0.00000
   0  -9  13   10.55    4.37  -1 0.00000 0.00000 0.00000 0.00000 0.00000 0.00000
 -11   9   9   10.55    4.37   2 0.00000 0.00000 0.00000 0.00000 0.00000 0.00000
  -1  -9  14  142.22    5.11  -1 0.00000 0.00000 0.00000 0.00000 0.00000 0.00000
 -11   9  10  142.22    5.11   2 0.00000 0.00000 0.00000 0.00000 0.00000 0.00000
  12 -10   2   66.70    3.14   2 0.00000 0.00000 0.00000 0.00000 0.00000 0.00000
  11 -10   3    6.97    2.93   2 0.00000 0.00000 0.00000 0.00000 0.00000 0.00000
  10 -10   4  162.03    6.34   2 0.00000 0.00000 0.00000 0.00000 0.00000 0.00000
   9 -10   5   16.69    3.08   2 0.00000 0.00000 0.00000 0.00000 0.00000 0.00000
   8 -10   6    2.43    2.58   2 0.00000 0.00000 0.00000 0.00000 0.00000 0.00000
   7 -10   7  381.36    6.32  -1 0.00000 0.00000 0.00000 0.00000 0.00000 0.00000
  11 -10  -1  381.36    6.32   2 0.00000 0.00000 0.00000 0.00000 0.00000 0.00000
   6 -10   8   78.25    3.34  -1 0.00000 0.00000 0.00000 0.00000 0.00000 0.00000
 -11  10   2   78.25    3.34   2 0.00000 0.00000 0.00000 0.00000 0.00000 0.00000
   5 -10   9  133.80    5.96  -1 0.00000 0.00000 0.00000 0.00000 0.00000 0.00000
 -11  10   3  133.80    5.96   2 0.00000 0.00000 0.00000 0.00000 0.00000 0.00000
   4 -10  10   51.87    3.04   2 0.00000 0.00000 0.00000 0.00000 0.00000 0.00000
   3 -10  11   51.56    3.09   2 0.00000 0.00000 0.00000 0.00000 0.00000 0.00000
   2 -10  12   59.55    3.31   2 0.00000 0.00000 0.00000 0.00000 0.00000 0.00000
   1 -10  13   24.99    2.67   2 0.00000 0.00000 0.00000 0.00000 0.00000 0.00000
  10 -11   5   33.63    4.43   2 0.00000 0.00000 0.00000 0.00000 0.00000 0.00000
   9 -11   6   72.34    5.15   2 0.00000 0.00000 0.00000 0.00000 0.00000 0.00000
   8 -11   7    0.99    2.81   2 0.00000 0.00000 0.00000 0.00000 0.00000 0.00000
   7 -11   8  173.74    6.71   2 0.00000 0.00000 0.00000 0.00000 0.00000 0.00000
   6 -11   9  107.89    6.24  -1 0.00000 0.00000 0.00000 0.00000 0.00000 0.00000
 -12  11   3  107.89    6.24   2 0.00000 0.00000 0.00000 0.00000 0.00000 0.00000
   5 -11  10   39.76    4.57  -1 0.00000 0.00000 0.00000 0.00000 0.00000 0.00000
 -12  11   4   39.76    4.57   2 0.00000 0.00000 0.00000 0.00000 0.00000 0.00000
   4 -11  11  202.56    7.38  -1 0.00000 0.00000 0.00000 0.00000 0.00000 0.00000
 -12  11   5  202.56    7.38   2 0.00000 0.00000 0.00000 0.00000 0.00000 0.00000
   3 -11  12   45.85    3.28   2 0.00000 0.00000 0.00000 0.00000 0.00000 0.00000
  -5  15  -5   11.52    2.78   2 0.00000 0.00000 0.00000 0.00000 0.00000 0.00000
  -6  15  -4    2.38    2.48   2 0.00000 0.00000 0.00000 0.00000 0.00000 0.00000
  -1  14  -8  107.41    5.65  -1 0.00000 0.00000 0.00000 0.00000 0.00000 0.00000
  -7  14   4  107.41    5.65   2 0.00000 0.00000 0.00000 0.00000 0.00000 0.00000
  -2  14  -7  130.41    5.26  -1 0.00000 0.00000 0.00000 0.00000 0.00000 0.00000
  -7  14   3  130.41    5.26   2 0.00000 0.00000 0.00000 0.00000 0.00000 0.00000
  -3  14  -6   26.27    4.69  -1 0.00000 0.00000 0.00000 0.00000 0.00000 0.00000
  -7  14   2   26.27    4.69   2 0.00000 0.00000 0.00000 0.00000 0.00000 0.00000
  -4  14  -5   81.09    4.56   2 0.00000 0.00000 0.00000 0.00000 0.00000 0.00000
  -5  14  -4   23.16    3.69   2 0.00000 0.00000 0.00000 0.00000 0.00000 0.00000
  -6  14  -3    8.09    2.56   2 0.00000 0.00000 0.00000 0.00000 0.00000 0.00000
  -7  14  -2  237.94    6.95   2 0.00000 0.00000 0.00000 0.00000 0.00000 0.00000
  -9  14   0    6.08    4.43  -1 0.00000 0.00000 0.00000 0.00000 0.00000 0.00000
  -6  14  -6    6.08    4.43   2 0.00000 0.00000 0.00000 0.00000 0.00000 0.00000
 -10  14   1  176.25    6.57  -1 0.00000 0.00000 0.00000 0.00000 0.00000 0.00000
  -6  14  -7  176.25    6.57   2 0.00000 0.00000 0.00000 0.00000 0.00000 0.00000
   1  13  -9   51.01    2.84   2 0.00000 0.00000 0.00000 0.00000 0.00000 0.00000
   0  13  -8    0.02    1.54   2 0.00000 0.00000 0.00000 0.00000 0.00000 0.00000
  -1  13  -7    1.21    1.51   2 0.00000 0.00000 0.00000 0.00000 0.00000 0.00000
  -2  13  -6  289.59    7.59  -1 0.00000 0.00000 0.00000 0.00000 0.00000 0.00000
  -6  13   2  289.59    7.59   2 0.00000 0.00000 0.00000 0.00000 0.00000 0.00000
  -3  13  -5   10.72    3.51  -1 0.00000 0.00000 0.00000 0.00000 0.00000 0.00000
  -6  13   1   10.72    3.51   2 0.00000 0.00000 0.00000 0.00000 0.00000 0.00000
  -4  13  -4  154.48    5.69  -1 0.00000 0.00000 0.00000 0.00000 0.00000 0.00000
  -6  13   0  154.48    5.69   2 0.00000 0.00000 0.00000 0.00000 0.00000 0.00000
  -6  13  -2   24.48    3.37   2 0.00000 0.00000 0.00000 0.00000 0.00000 0.00000
  -7  13  -1  118.62    4.99   2 0.00000 0.00000 0.00000 0.00000 0.00000 0.00000
  -8  13   0   14.67    2.66   2 0.00000 0.00000 0.00000 0.00000 0.00000 0.00000
  -9  13   1   57.62    4.31   2 0.00000 0.00000 0.00000 0.00000 0.00000 0.00000
 -10  13   2  297.19    6.13  -1 0.00000 0.00000 0.00000 0.00000 0.00000 0.00000
   5 -13   8  297.19    6.13   2 0.00000 0.00000 0.00000 0.00000 0.00000 0.00000
 -11  13   3   57.11    3.43  -1 0.00000 0.00000 0.00000 0.00000 0.00000 0.00000
   5 -13   9   57.11    3.43   2 0.00000 0.00000 0.00000 0.00000 0.00000 0.00000
   2  12  -9  184.59    9.33  -1 0.00000 0.00000 0.00000 0.00000 0.00000 0.00000
  -6  12   7  184.59    9.33   2 0.00000 0.00000 0.00000 0.00000 0.00000 0.00000
   1  12  -8  130.38    3.48   2 0.00000 0.00000 0.00000 0.00000 0.00000 0.00000
   0  12  -7   72.06    2.83   2 0.00000 0.00000 0.00000 0.00000 0.00000 0.00000
  -1  12  -6    1.94    1.37   2 0.00000 0.00000 0.00000 0.00000 0.00000 0.00000
  -2  12  -5  269.11    6.42   2 0.00000 0.00000 0.00000 0.00000 0.00000 0.00000
  -4  12  -3   15.69    3.60  -1 0.00000 0.00000 0.00000 0.00000 0.00000 0.00000
  -5  12  -1   15.69    3.60   2 0.00000 0.00000 0.00000 0.00000 0.00000 0.00000
  -5  12  -2  484.90    9.28  -1 0.00000 0.00000 0.00000 0.00000 0.00000 0.00000
  -5  12  -2  484.90    9.28   2 0.00000 0.00000 0.00000 0.00000 0.00000 0.00000
  -6  12  -1   57.54    4.97  -1 0.00000 0.00000 0.00000 0.00000 0.00000 0.00000
  -5  12  -3   57.54    4.97   2 0.00000 0.00000 0.00000 0.00000 0.00000 0.00000
  -7  12   0  104.63    4.48   2 0.00000 0.00000 0.00000 0.00000 0.00000 0.00000
  -8  12   1  102.42    4.66   2 0.00000 0.00000 0.00000 0.00000 0.00000 0.00000
  -9  12   2  191.78    6.08   2 0.00000 0.00000 0.00000 0.00000 0.00000 0.00000
 -10  12   3   81.68    4.60   2 0.00000 0.00000 0.00000 0.00000 0.00000 0.00000
 -11  12   4  147.91    6.80  -1 0.00000 0.00000 0.00000 0.00000 0.00000 0.00000
   4 -12  10  147.91    6.80   2 0.00000 0.00000 0.00000 0.00000 0.00000 0.00000
 -12  12   5  136.32    6.20  -1 0.00000 0.00000 0.00000 0.00000 0.00000 0.00000
   4 -12  11  136.32    6.20   2 0.00000 0.00000 0.00000 0.00000 0.00000 0.00000
   4  11 -10   10.82    1.47   2 0.00000 0.00000 0.00000 0.00000 0.00000 0.00000
   3  11  -9  119.56    8.17  -1 0.00000 0.00000 0.00000 0.00000 0.00000 0.00000
  -5  11   7  119.56    8.17   2 0.00000 0.00000 0.00000 0.00000 0.00000 0.00000
   2  11  -8    2.31    4.62  -1 0.00000 0.00000 0.00000 0.00000 0.00000 0.00000
  -5  11   6    2.31    4.62   2 0.00000 0.00000 0.00000 0.00000 0.00000 0.00000
   1  11  -7  201.65    5.46  -1 0.00000 0.00000 0.00000 0.00000 0.00000 0.00000
  -5  11   5  201.65    5.46   2 0.00000 0.00000 0.00000 0.00000 0.00000 0.00000
   0  11  -6  651.19   10.68  -1 0.00000 0.00000 0.00000 0.00000 0.00000 0.00000
  -5  11   4  651.19   10.68   2 0.00000 0.00000 0.00000 0.00000 0.00000 0.00000
   0  11  -6  397.22    4.55   2 0.00000 0.00000 0.00000 0.00000 0.00000 0.00000
  -1  11  -5   36.66    1.93   2 0.00000 0.00000 0.00000 0.00000 0.00000 0.00000
  -2  11  -4  249.94    5.94   2 0.00000 0.00000 0.00000 0.00000 0.00000 0.00000
  -3  11  -3   58.62    3.53   2 0.00000 0.00000 0.00000 0.00000 0.00000 0.00000
  -4  11  -2  116.68    4.27   2 0.00000 0.00000 0.00000 0.00000 0.00000 0.00000
  -5  11  -1  376.28    8.09  -1 0.00000 0.00000 0.00000 0.00000 0.00000 0.00000
  -4  11  -3  376.28    8.09   2 0.00000 0.00000 0.00000 0.00000 0.00000 0.00000
  -6  11   0   28.22    1.88  -1 0.00000 0.00000 0.00000 0.00000 0.00000 0.00000
  -4  11  -4   28.22    1.88   2 0.00000 0.00000 0.00000 0.00000 0.00000 0.00000
  -7  11   1    7.57    2.35  -1 0.00000 0.00000 0.00000 0.00000 0.00000 0.00000
  -4  11  -5    7.57    2.35   2 0.00000 0.00000 0.00000 0.00000 0.00000 0.00000
  -8  11   2  245.48    6.41   2 0.00000 0.00000 0.00000 0.00000 0.00000 0.00000
  -9  11   3  211.33    6.08   2 0.00000 0.00000 0.00000 0.00000 0.00000 0.00000
 -10  11   4   31.96    3.71   2 0.00000 0.00000 0.00000 0.00000 0.00000 0.00000
 -11  11   5   17.92    3.03   2 0.00000 0.00000 0.00000 0.00000 0.00000 0.00000
 -12  11   6  184.48    6.55   2 0.00000 0.00000 0.00000 0.00000 0.00000 0.00000
   5  10 -10   54.42    2.26   2 0.00000 0.00000 0.00000 0.00000 0.00000 0.00000
   4  10  -9    6.16    1.25   2 0.00000 0.00000 0.00000 0.00000 0.00000 0.00000
   3  10  -8   69.14    2.20   2 0.00000 0.00000 0.00000 0.00000 0.00000 0.00000
   2  10  -7   77.96    3.40  -1 0.00000 0.00000 0.00000 0.00000 0.00000 0.00000
  -4  10   5   77.96    3.40   2 0.00000 0.00000 0.00000 0.00000 0.00000 0.00000
   1  10  -6   56.34    3.45  -1 0.00000 0.00000 0.00000 0.00000 0.00000 0.00000
  -4  10   4   56.34    3.45   2 0.00000 0.00000 0.00000 0.00000 0.00000 0.00000
   0  10  -5  899.90   12.57  -1 0.00000 0.00000 0.00000 0.00000 0.00000 0.00000
  -4  10   3  899.90   12.57   2 0.00000 0.00000 0.00000 0.00000 0.00000 0.00000
  -1  10  -4   38.27    1.79   2 0.00000 0.00000 0.00000 0.00000 0.00000 0.00000
  -2  10  -3   93.07    2.63   2 0.00000 0.00000 0.00000 0.00000 0.00000 0.00000
  -3  10  -2  215.63    5.26   2 0.00000 0.00000 0.00000 0.00000 0.00000 0.00000
  -4  10  -1    5.33    1.70   2 0.00000 0.00000 0.00000 0.00000 0.00000 0.00000
  -5  10   0  183.13    4.95   2 0.00000 0.00000 0.00000 0.00000 0.00000 0.00000
  -6  10   1    5.94    1.80   2 0.00000 0.00000 0.00000 0.00000 0.00000 0.00000
  -6  10   1  150.13    5.49  -1 0.00000 0.00000 0.00000 0.00000 0.00000 0.00000
  -3  10  -5  150.13    5.49   2 0.00000 0.00000 0.00000 0.00000 0.00000 0.00000
  -7  10   2  104.33    2.64  -1 0.00000 0.00000 0.00000 0.00000 0.00000 0.00000
  -3  10  -6  104.33    2.64   2 0.00000 0.00000 0.00000 0.00000 0.00000 0.00000
  -8  10   3  225.42    3.71  -1 0.00000 0.00000 0.00000 0.00000 0.00000 0.00000
   3 -10   7  225.42    3.71   2 0.00000 0.00000 0.00000 0.00000 0.00000 0.00000
  -9  10   4  103.39    4.56   2 0.00000 0.00000 0.00000 0.00000 0.00000 0.00000
 -10  10   5   10.53    2.54   2 0.00000 0.00000 0.00000 0.00000 0.00000 0.00000
 -11  10   6   37.29    2.90   2 0.00000 0.00000 0.00000 0.00000 0.00000 0.00000
 -12  10   7   75.48    3.66   2 0.00000 0.00000 0.00000 0.00000 0.00000 0.00000
   6   9 -10  181.09    9.09  -1 0.00000 0.00000 0.00000 0.00000 0.00000 0.00000
  -4   9  10  181.09    9.09   2 0.00000 0.00000 0.00000 0.00000 0.00000 0.00000
   5   9  -9  129.62    3.06   2 0.00000 0.00000 0.00000 0.00000 0.00000 0.00000
   4   9  -8    4.45    1.13   2 0.00000 0.00000 0.00000 0.00000 0.00000 0.00000
   3   9  -7   37.68    1.80   2 0.00000 0.00000 0.00000 0.00000 0.00000 0.00000
   2   9  -6   87.65    2.15   2 0.00000 0.00000 0.00000 0.00000 0.00000 0.00000
   1   9  -5    5.82    0.97   2 0.00000 0.00000 0.00000 0.00000 0.00000 0.00000
   0   9  -4   76.09    3.75  -1 0.00000 0.00000 0.00000 0.00000 0.00000 0.00000
  -3   9   2   76.09    3.75   2 0.00000 0.00000 0.00000 0.00000 0.00000 0.00000
  -1   9  -3  159.70    4.25  -1 0.00000 0.00000 0.00000 0.00000 0.00000 0.00000
  -3   9   1  159.70    4.25   2 0.00000 0.00000 0.00000 0.00000 0.00000 0.00000
  -3   9  -1  917.90    8.72   2 0.00000 0.00000 0.00000 0.00000 0.00000 0.00000
  -4   9   0    1.70    1.40   2 0.00000 0.00000 0.00000 0.00000 0.00000 0.00000
  -5   9   1    6.39    1.65   2 0.00000 0.00000 0.00000 0.00000 0.00000 0.00000
  -6   9   2   96.51    3.86   2 0.00000 0.00000 0.00000 0.00000 0.00000 0.00000
  -7   9   3  111.29    4.17   2 0.00000 0.00000 0.00000 0.00000 0.00000 0.00000
  -8   9   4   22.94    2.19  -1 0.00000 0.00000 0.00000 0.00000 0.00000 0.00000
   2  -9   8   22.94    2.19   2 0.00000 0.00000 0.00000 0.00000 0.00000 0.00000
  -9   9   5    4.62    2.44  -1 0.00000 0.00000 0.00000 0.00000 0.00000 0.00000
   2  -9   9    4.62    2.44   2 0.00000 0.00000 0.00000 0.00000 0.00000 0.00000
 -10   9   6  100.27    4.12  -1 0.00000 0.00000 0.00000 0.00000 0.00000 0.00000
   2  -9  10  100.27    4.12   2 0.00000 0.00000 0.00000 0.00000 0.00000 0.00000
 -11   9   7   49.70    3.15   2 0.00000 0.00000 0.00000 0.00000 0.00000 0.00000
 -12   9   8  110.50    3.98   2 0.00000 0.00000 0.00000 0.00000 0.00000 0.00000
   7   8 -10   37.73    7.42  -1 0.00000 0.00000 0.00000 0.00000 0.00000 0.00000
  -3   8  10   37.73    7.42   2 0.00000 0.00000 0.00000 0.00000 0.00000 0.00000
   6   8  -9  229.49    8.62  -1 0.00000 0.00000 0.00000 0.00000 0.00000 0.00000
  -3   8   9  229.49    8.62   2 0.00000 0.00000 0.00000 0.00000 0.00000 0.00000
   5   8  -8  323.24    9.97  -1 0.00000 0.00000 0.00000 0.00000 0.00000 0.00000
  -3   8   8  323.24    9.97   2 0.00000 0.00000 0.00000 0.00000 0.00000 0.00000
   4   8  -7    6.34    1.12   2 0.00000 0.00000 0.00000 0.00000 0.00000 0.00000
   4   8  -7   11.38    6.06  -1 0.00000 0.00000 0.00000 0.00000 0.00000 0.00000
  -3   8   7   11.38    6.06   2 0.00000 0.00000 0.00000 0.00000 0.00000 0.00000
   3   8  -6   17.58    1.67   2 0.00000 0.00000 0.00000 0.00000 0.00000 0.00000
   2   8  -5  378.32    4.64   2 0.00000 0.00000 0.00000 0.00000 0.00000 0.00000
   1   8  -4    1.93    0.81   2 0.00000 0.00000 0.00000 0.00000 0.00000 0.00000
   0   8  -3   57.69    1.63   2 0.00000 0.00000 0.00000 0.00000 0.00000 0.00000
  -1   8  -2   78.82    2.04   2 0.00000 0.00000 0.00000 0.00000 0.00000 0.00000
  -2   8  -1  215.43    3.09  -1 0.00000 0.00000 0.00000 0.00000 0.00000 0.00000
  -2   8  -1  215.43    3.09   2 0.00000 0.00000 0.00000 0.00000 0.00000 0.00000
  -3   8   0  875.30    8.50  -1 0.00000 0.00000 0.00000 0.00000 0.00000 0.00000
  -2   8  -2  875.30    8.50   2 0.00000 0.00000 0.00000 0.00000 0.00000 0.00000
  -4   8   1   72.40    1.80   2 0.00000 0.00000 0.00000 0.00000 0.00000 0.00000
  -5   8   2   36.74    2.80   2 0.00000 0.00000 0.00000 0.00000 0.00000 0.00000
  -6   8   3  208.11    5.03   2 0.00000 0.00000 0.00000 0.00000 0.00000 0.00000
  -7   8   4   56.60    3.37   2 0.00000 0.00000 0.00000 0.00000 0.00000 0.00000
  -8   8   5   51.22    3.51   2 0.00000 0.00000 0.00000 0.00000 0.00000 0.00000
  -9   8   6  427.99    6.55  -1 0.00000 0.00000 0.00000 0.00000 0.00000 0.00000
   1  -8  10  427.99    6.55   2 0.00000 0.00000 0.00000 0.00000 0.00000 0.00000
 -10   8   7  473.19    5.55  -1 0.00000 0.00000 0.00000 0.00000 0.00000 0.00000
   1  -8  11  473.19    5.55   2 0.00000 0.00000 0.00000 0.00000 0.00000 0.00000
 -11   8   8    8.43    3.52  -1 0.00000 0.00000 0.00000 0.00000 0.00000 0.00000
   1  -8  12    8.43    3.52   2 0.00000 0.00000 0.00000 0.00000 0.00000 0.00000
 -12   8   9   31.25    2.40   2 0.00000 0.00000 0.00000 0.00000 0.00000 0.00000
   8   7 -10   56.03    2.07   2 0.00000 0.00000 0.00000 0.00000 0.00000 0.00000
   7   7  -9  164.75    2.80   2 0.00000 0.00000 0.00000 0.00000 0.00000 0.00000
   6   7  -8   81.35    2.09   2 0.00000 0.00000 0.00000 0.00000 0.00000 0.00000
   6   7  -8  318.05   10.62  -1 0.00000 0.00000 0.00000 0.00000 0.00000 0.00000
  -2   7   8  318.05   10.62   2 0.00000 0.00000 0.00000 0.00000 0.00000 0.00000
   5   7  -7  113.61    3.97  -1 0.00000 0.00000 0.00000 0.00000 0.00000 0.00000
  -2   7   7  113.61    3.97   2 0.00000 0.00000 0.00000 0.00000 0.00000 0.00000
   4   7  -6   91.82    3.30  -1 0.00000 0.00000 0.00000 0.00000 0.00000 0.00000
  -2   7   6   91.82    3.30   2 0.00000 0.00000 0.00000 0.00000 0.00000 0.00000
   3   7  -5  457.65   10.91  -1 0.00000 0.00000 0.00000 0.00000 0.00000 0.00000
  -2   7   5  457.65   10.91   2 0.00000 0.00000 0.00000 0.00000 0.00000 0.00000
   2   7  -4  428.31    3.94   2 0.00000 0.00000 0.00000 0.00000 0.00000 0.00000
   1   7  -3   34.49    1.23   2 0.00000 0.00000 0.00000 0.00000 0.00000 0.00000
   0   7  -2   17.49    1.41   2 0.00000 0.00000 0.00000 0.00000 0.00000 0.00000
  -1   7  -1 1032.15    9.13   2 0.00000 0.00000 0.00000 0.00000 0.00000 0.00000
  -2   7   0    0.84    0.62   2 0.00000 0.00000 0.00000 0.00000 0.00000 0.00000
  -3   7   1  245.95    2.92  -1 0.00000 0.00000 0.00000 0.00000 0.00000 0.00000
  -1   7  -3  245.95    2.92   2 0.00000 0.00000 0.00000 0.00000 0.00000 0.00000
  -4   7   2  523.41    4.77  -1 0.00000 0.00000 0.00000 0.00000 0.00000 0.00000
  -1   7  -4  523.41    4.77   2 0.00000 0.00000 0.00000 0.00000 0.00000 0.00000
  -5   7   3  287.71    3.52   2 0.00000 0.00000 0.00000 0.00000 0.00000 0.00000
  -6   7   4  155.34    4.26   2 0.00000 0.00000 0.00000 0.00000 0.00000 0.00000
  -7   7   5   37.09    2.94   2 0.00000 0.00000 0.00000 0.00000 0.00000 0.00000
  -8   7   6   17.21    2.88   2 0.00000 0.00000 0.00000 0.00000 0.00000 0.00000
  -9   7   7  268.92    4.78   2 0.00000 0.00000 0.00000 0.00000 0.00000 0.00000
 -10   7   8  347.73    8.84  -1 0.00000 0.00000 0.00000 0.00000 0.00000 0.00000
   0  -7  12  347.73    8.84   2 0.00000 0.00000 0.00000 0.00000 0.00000 0.00000
 -11   7   9   35.73    2.67  -1 0.00000 0.00000 0.00000 0.00000 0.00000 0.00000
   0  -7  13   35.73    2.67   2 0.00000 0.00000 0.00000 0.00000 0.00000 0.00000
 -12   7  10   64.47    3.99  -1 0.00000 0.00000 0.00000 0.00000 0.00000 0.00000
   0  -7  14   64.47    3.99   2 0.00000 0.00000 0.00000 0.00000 0.00000 0.00000
   9   6 -10   11.20    1.58   2 0.00000 0.00000 0.00000 0.00000 0.00000 0.00000
   8   6  -9   30.86    1.75   2 0.00000 0.00000 0.00000 0.00000 0.00000 0.00000
   7   6  -8  228.11    3.08   2 0.00000 0.00000 0.00000 0.00000 0.00000 0.00000
   6   6  -7  149.51    2.42   2 0.00000 0.00000 0.00000 0.00000 0.00000 0.00000
   5   6  -6   98.92    1.95   2 0.00000 0.00000 0.00000 0.00000 0.00000 0.00000
   4   6  -5 1017.17   11.35  -1 0.00000 0.00000 0.00000 0.00000 0.00000 0.00000
  -1   6   5 1017.17   11.35   2 0.00000 0.00000 0.00000 0.00000 0.00000 0.00000
   3   6  -4  367.69    5.15  -1 0.00000 0.00000 0.00000 0.00000 0.00000 0.00000
  -1   6   4  367.69    5.15   2 0.00000 0.00000 0.00000 0.00000 0.00000 0.00000
   2   6  -3  364.48    5.05  -1 0.00000 0.00000 0.00000 0.00000 0.00000 0.00000
  -1   6   3  364.48    5.05   2 0.00000 0.00000 0.00000 0.00000 0.00000 0.00000
   1   6  -2  108.51    1.93   2 0.00000 0.00000 0.00000 0.00000 0.00000 0.00000
   0   6  -1   20.01    1.29   2 0.00000 0.00000 0.00000 0.00000 0.00000 0.00000
  -1   6   0  651.05    5.89   2 0.00000 0.00000 0.00000 0.00000 0.00000 0.00000
  -2   6   1   63.15    1.05   2 0.00000 0.00000 0.00000 0.00000 0.00000 0.00000
  -3   6   2   42.60    2.30   2 0.00000 0.00000 0.00000 0.00000 0.00000 0.00000
  -4   6   3 2505.63   15.02  -1 0.00000 0.00000 0.00000 0.00000 0.00000 0.00000
   0   6  -5 2505.63   15.02   2 0.00000 0.00000 0.00000 0.00000 0.00000 0.00000
  -5   6   4  216.33    2.42  -1 0.00000 0.00000 0.00000 0.00000 0.00000 0.00000
   0  -6   6  216.33    2.42   2 0.00000 0.00000 0.00000 0.00000 0.00000 0.00000
  -6   6   5  214.90    2.81  -1 0.00000 0.00000 0.00000 0.00000 0.00000 0.00000
   0  -6   7  214.90    2.81   2 0.00000 0.00000 0.00000 0.00000 0.00000 0.00000
  -6   6   5   85.74    3.35   2 0.00000 0.00000 0.00000 0.00000 0.00000 0.00000
  -7   6   6    1.98    1.73   2 0.00000 0.00000 0.00000 0.00000 0.00000 0.00000
  -8   6   7  359.90    5.30   2 0.00000 0.00000 0.00000 0.00000 0.00000 0.00000
  -9   6   8  114.49    3.45   2 0.00000 0.00000 0.00000 0.00000 0.00000 0.00000
 -10   6   9   43.54    2.96   2 0.00000 0.00000 0.00000 0.00000 0.00000 0.00000
 -12   6  11   92.81    4.68  -1 0.00000 0.00000 0.00000 0.00000 0.00000 0.00000
  -1  -6  15   92.81    4.68   2 0.00000 0.00000 0.00000 0.00000 0.00000 0.00000
  10   5 -10   73.13    4.53  -1 0.00000 0.00000 0.00000 0.00000 0.00000 0.00000
  -1   5  12   73.13    4.53   2 0.00000 0.00000 0.00000 0.00000 0.00000 0.00000
   9   5  -9   65.73    4.17  -1 0.00000 0.00000 0.00000 0.00000 0.00000 0.00000
  -1   5  11   65.73    4.17   2 0.00000 0.00000 0.00000 0.00000 0.00000 0.00000
   8   5  -8  235.25    3.08   2 0.00000 0.00000 0.00000 0.00000 0.00000 0.00000
   8   5  -8  539.16   13.71  -1 0.00000 0.00000 0.00000 0.00000 0.00000 0.00000
  -1   5  10  539.16   13.71   2 0.00000 0.00000 0.00000 0.00000 0.00000 0.00000
   7   5  -7  156.14    2.39   2 0.00000 0.00000 0.00000 0.00000 0.00000 0.00000
   6   5  -6    2.01    0.74   2 0.00000 0.00000 0.00000 0.00000 0.00000 0.00000
   5   5  -5   52.10    1.31   2 0.00000 0.00000 0.00000 0.00000 0.00000 0.00000
   4   5  -4  777.38    5.40   2 0.00000 0.00000 0.00000 0.00000 0.00000 0.00000
   3   5  -3  286.52    7.71  -1 0.00000 0.00000 0.00000 0.00000 0.00000 0.00000
   0   5   3  286.52    7.71   2 0.00000 0.00000 0.00000 0.00000 0.00000 0.00000
   2   5  -2   11.07    1.64  -1 0.00000 0.00000 0.00000 0.00000 0.00000 0.00000
   0   5   2   11.07    1.64   2 0.00000 0.00000 0.00000 0.00000 0.00000 0.00000
   1   5  -1 1216.56   18.83  -1 0.00000 0.00000 0.00000 0.00000 0.00000 0.00000
   0   5   1 1216.56   18.83   2 0.00000 0.00000 0.00000 0.00000 0.00000 0.00000
   0   5   0   21.56    1.48   2 0.00000 0.00000 0.00000 0.00000 0.00000 0.00000
  -1   5   1  278.50    2.96   2 0.00000 0.00000 0.00000 0.00000 0.00000 0.00000
  -2   5   2  386.36    4.05   2 0.00000 0.00000 0.00000 0.00000 0.00000 0.00000
  -3   5   3  280.43    4.76   2 0.00000 0.00000 0.00000 0.00000 0.00000 0.00000
  -4   5   4  469.49    7.09   2 0.00000 0.00000 0.00000 0.00000 0.00000 0.00000
  -5   5   5  326.18    3.31  -1 0.00000 0.00000 0.00000 0.00000 0.00000 0.00000
  -1  -5   7  326.18    3.31   2 0.00000 0.00000 0.00000 0.00000 0.00000 0.00000
  -5   5   5  209.50    4.56   2 0.00000 0.00000 0.00000 0.00000 0.00000 0.00000
  -6   5   6   30.34    1.48  -1 0.00000 0.00000 0.00000 0.00000 0.00000 0.00000
  -1  -5   8   30.34    1.48   2 0.00000 0.00000 0.00000 0.00000 0.00000 0.00000
  -7   5   7  290.84    4.02  -1 0.00000 0.00000 0.00000 0.00000 0.00000 0.00000
  -1  -5   9  290.84    4.02   2 0.00000 0.00000 0.00000 0.00000 0.00000 0.00000
  -8   5   8  216.85    4.14   2 0.00000 0.00000 0.00000 0.00000 0.00000 0.00000
  -9   5   9   42.98    2.80   2 0.00000 0.00000 0.00000 0.00000 0.00000 0.00000
 -10   5  10   -0.39    1.74   2 0.00000 0.00000 0.00000 0.00000 0.00000 0.00000
 -11   5  11  113.96    4.01   2 0.00000 0.00000 0.00000 0.00000 0.00000 0.00000
 -12   5  12    1.80    3.21   2 0.00000 0.00000 0.00000 0.00000 0.00000 0.00000
  10   4  -9   -0.79    1.20   2 0.00000 0.00000 0.00000 0.00000 0.00000 0.00000
   9   4  -8  375.10    7.23  -1 0.00000 0.00000 0.00000 0.00000 0.00000 0.00000
   0   4  10  375.10    7.23   2 0.00000 0.00000 0.00000 0.00000 0.00000 0.00000
   8   4  -7   61.72    3.40  -1 0.00000 0.00000 0.00000 0.00000 0.00000 0.00000
   0   4   9   61.72    3.40   2 0.00000 0.00000 0.00000 0.00000 0.00000 0.00000
   7   4  -6  150.35    4.66  -1 0.00000 0.00000 0.00000 0.00000 0.00000 0.00000
   0   4   8  150.35    4.66   2 0.00000 0.00000 0.00000 0.00000 0.00000 0.00000
   6   4  -5  155.30    1.86   2 0.00000 0.00000 0.00000 0.00000 0.00000 0.00000
   5   4  -4  150.17    1.70   2 0.00000 0.00000 0.00000 0.00000 0.00000 0.00000
   4   4  -3  300.88    3.02   2 0.00000 0.00000 0.00000 0.00000 0.00000 0.00000
   3   4  -2   28.18    1.66   2 0.00000 0.00000 0.00000 0.00000 0.00000 0.00000
   2   4  -1  397.49    4.86   2 0.00000 0.00000 0.00000 0.00000 0.00000 0.00000
   1   4   0 1416.80   20.96  -1 0.00000 0.00000 0.00000 0.00000 0.00000 0.00000
   1   4   0 1416.80   20.96   2 0.00000 0.00000 0.00000 0.00000 0.00000 0.00000
   0   4   1  289.85    4.17  -1 0.00000 0.00000 0.00000 0.00000 0.00000 0.00000
   1   4  -1  289.85    4.17   2 0.00000 0.00000 0.00000 0.00000 0.00000 0.00000
  -1   4   2  181.09    2.28   2 0.00000 0.00000 0.00000 0.00000 0.00000 0.00000
  -2   4   3  275.36    3.27   2 0.00000 0.00000 0.00000 0.00000 0.00000 0.00000
  -3   4   4  426.59    4.70   2 0.00000 0.00000 0.00000 0.00000 0.00000 0.00000
  -4   4   5  140.32    3.52   2 0.00000 0.00000 0.00000 0.00000 0.00000 0.00000
  -5   4   6  219.40    3.43   2 0.00000 0.00000 0.00000 0.00000 0.00000 0.00000
  -7   4   8  640.15    6.33  -1 0.00000 0.00000 0.00000 0.00000 0.00000 0.00000
  -2  -4  10  640.15    6.33   2 0.00000 0.00000 0.00000 0.00000 0.00000 0.00000
  -8   4   9  177.76    4.26  -1 0.00000 0.00000 0.00000 0.00000 0.00000 0.00000
  -2  -4  11  177.76    4.26   2 0.00000 0.00000 0.00000 0.00000 0.00000 0.00000
 -10   4  11   11.90    2.95   2 0.00000 0.00000 0.00000 0.00000 0.00000 0.00000
 -11   4  12  170.99    6.57   2 0.00000 0.00000 0.00000 0.00000 0.00000 0.00000
 -12   4  13   -5.16    2.41   2 0.00000 0.00000 0.00000 0.00000 0.00000 0.00000
  11   3  -9   11.96    1.46   2 0.00000 0.00000 0.00000 0.00000 0.00000 0.00000
  10   3  -8   23.93    2.01   2 0.00000 0.00000 0.00000 0.00000 0.00000 0.00000
   9   3  -7  102.36    2.61   2 0.00000 0.00000 0.00000 0.00000 0.00000 0.00000
   8   3  -6  123.67    4.50  -1 0.00000 0.00000 0.00000 0.00000 0.00000 0.00000
   1   3   8  123.67    4.50   2 0.00000 0.00000 0.00000 0.00000 0.00000 0.00000
   7   3  -5   68.09    2.16  -1 0.00000 0.00000 0.00000 0.00000 0.00000 0.00000
   1   3   7   68.09    2.16   2 0.00000 0.00000 0.00000 0.00000 0.00000 0.00000
   6   3  -4 1024.14    8.79  -1 0.00000 0.00000 0.00000 0.00000 0.00000 0.00000
   1   3   6 1024.14    8.79   2 0.00000 0.00000 0.00000 0.00000 0.00000 0.00000
   5   3  -3   46.21    2.03   2 0.00000 0.00000 0.00000 0.00000 0.00000 0.00000
   4   3  -2  182.96    3.19   2 0.00000 0.00000 0.00000 0.00000 0.00000 0.00000
   3   3  -1  212.15    3.34   2 0.00000 0.00000 0.00000 0.00000 0.00000 0.00000
   2   3   0  122.68    3.85   2 0.00000 0.00000 0.00000 0.00000 0.00000 0.00000
   1   3   1  476.37    4.98   2 0.00000 0.00000 0.00000 0.00000 0.00000 0.00000
   0   3   2  124.39    3.76  -1 0.00000 0.00000 0.00000 0.00000 0.00000 0.00000
   2   3  -2  124.39    3.76   2 0.00000 0.00000 0.00000 0.00000 0.00000 0.00000
  -1   3   3 1380.15    9.60  -1 0.00000 0.00000 0.00000 0.00000 0.00000 0.00000
   2   3  -3 1380.15    9.60   2 0.00000 0.00000 0.00000 0.00000 0.00000 0.00000
  -2   3   4 1579.37   19.92  -1 0.00000 0.00000 0.00000 0.00000 0.00000 0.00000
   2   3  -4 1579.37   19.92   2 0.00000 0.00000 0.00000 0.00000 0.00000 0.00000
  -3   3   5   93.99    1.86   2 0.00000 0.00000 0.00000 0.00000 0.00000 0.00000
  -4   3   6  103.84    1.72   2 0.00000 0.00000 0.00000 0.00000 0.00000 0.00000
  -5   3   7    1.25    0.74   2 0.00000 0.00000 0.00000 0.00000 0.00000 0.00000
  -6   3   8  122.30    2.10   2 0.00000 0.00000 0.00000 0.00000 0.00000 0.00000
  -7   3   9  313.61    7.07   2 0.00000 0.00000 0.00000 0.00000 0.00000 0.00000
  -8   3  10  720.89    9.14  -1 0.00000 0.00000 0.00000 0.00000 0.00000 0.00000
  -3  -3  12  720.89    9.14   2 0.00000 0.00000 0.00000 0.00000 0.00000 0.00000
  -9   3  11  160.66    4.38  -1 0.00000 0.00000 0.00000 0.00000 0.00000 0.00000
  -3  -3  13  160.66    4.38   2 0.00000 0.00000 0.00000 0.00000 0.00000 0.00000
 -10   3  12   16.68    3.97  -1 0.00000 0.00000 0.00000 0.00000 0.00000 0.00000
  -3  -3  14   16.68    3.97   2 0.00000 0.00000 0.00000 0.00000 0.00000 0.00000
 -11   3  13  143.28    4.71   2 0.00000 0.00000 0.00000 0.00000 0.00000 0.00000
  12   2  -9   29.28    4.50   2 0.00000 0.00000 0.00000 0.00000 0.00000 0.00000
  11   2  -8  107.68    2.78   2 0.00000 0.00000 0.00000 0.00000 0.00000 0.00000
  10   2  -7  122.68    2.79   2 0.00000 0.00000 0.00000 0.00000 0.00000 0.00000
   9   2  -6   11.29    1.44   2 0.00000 0.00000 0.00000 0.00000 0.00000 0.00000
   8   2  -5   12.36    1.29   2 0.00000 0.00000 0.00000 0.00000 0.00000 0.00000
   7   2  -4   -0.40    1.47   2 0.00000 0.00000 0.00000 0.00000 0.00000 0.00000
   7   2  -4   79.91    3.36  -1 0.00000 0.00000 0.00000 0.00000 0.00000 0.00000
   2   2   6   79.91    3.36   2 0.00000 0.00000 0.00000 0.00000 0.00000 0.00000
   6   2  -3 1584.82   15.44  -1 0.00000 0.00000 0.00000 0.00000 0.00000 0.00000
   2   2   5 1584.82   15.44   2 0.00000 0.00000 0.00000 0.00000 0.00000 0.00000
   5   2  -2   38.64    2.12  -1 0.00000 0.00000 0.00000 0.00000 0.00000 0.00000
   2   2   4   38.64    2.12   2 0.00000 0.00000 0.00000 0.00000 0.00000 0.00000
   4   2  -1  567.17   10.62  -1 0.00000 0.00000 0.00000 0.00000 0.00000 0.00000
   2   2   3  567.17   10.62   2 0.00000 0.00000 0.00000 0.00000 0.00000 0.00000
   3   2   0 1022.38    8.06   2 0.00000 0.00000 0.00000 0.00000 0.00000 0.00000
   2   2   1   14.91    1.34   2 0.00000 0.00000 0.00000 0.00000 0.00000 0.00000
   1   2   2  555.70    4.60   2 0.00000 0.00000 0.00000 0.00000 0.00000 0.00000
   0   2   3   38.38    1.13   2 0.00000 0.00000 0.00000 0.00000 0.00000 0.00000
  -1   2   4  477.84    7.26  -1 0.00000 0.00000 0.00000 0.00000 0.00000 0.00000
   3   2  -4  477.84    7.26   2 0.00000 0.00000 0.00000 0.00000 0.00000 0.00000
  -2   2   5 2633.66   30.51  -1 0.00000 0.00000 0.00000 0.00000 0.00000 0.00000
  -3  -2   5 2633.66   30.51   2 0.00000 0.00000 0.00000 0.00000 0.00000 0.00000
  -3   2   6  335.47    4.44  -1 0.00000 0.00000 0.00000 0.00000 0.00000 0.00000
  -3  -2   6  335.47    4.44   2 0.00000 0.00000 0.00000 0.00000 0.00000 0.00000
  -4   2   7  265.73    3.22   2 0.00000 0.00000 0.00000 0.00000 0.00000 0.00000
  -5   2   8   76.28    1.99   2 0.00000 0.00000 0.00000 0.00000 0.00000 0.00000
  -6   2   9  157.20    3.70   2 0.00000 0.00000 0.00000 0.00000 0.00000 0.00000
  -7   2  10  109.80    3.50   2 0.00000 0.00000 0.00000 0.00000 0.00000 0.00000
  -8   2  11   31.25    2.90   2 0.00000 0.00000 0.00000 0.00000 0.00000 0.00000
  -9   2  12  129.06    4.85  -1 0.00000 0.00000 0.00000 0.00000 0.00000 0.00000
  -4  -2  14  129.06    4.85   2 0.00000 0.00000 0.00000 0.00000 0.00000 0.00000
 -10   2  13   46.19    3.45  -1 0.00000 0.00000 0.00000 0.00000 0.00000 0.00000
  -4  -2  15   46.19    3.45   2 0.00000 0.00000 0.00000 0.00000 0.00000 0.00000
 -11   2  14  241.86    6.25  -1 0.00000 0.00000 0.00000 0.00000 0.00000 0.00000
  -4  -2  16  241.86    6.25   2 0.00000 0.00000 0.00000 0.00000 0.00000 0.00000
  12   1  -8  381.62    9.96  -1 0.00000 0.00000 0.00000 0.00000 0.00000 0.00000
   2   1  12  381.62    9.96   2 0.00000 0.00000 0.00000 0.00000 0.00000 0.00000
  10   1  -6   24.74    3.65   2 0.00000 0.00000 0.00000 0.00000 0.00000 0.00000
   9   1  -5   -0.77    1.70   2 0.00000 0.00000 0.00000 0.00000 0.00000 0.00000
   8   1  -4   91.84    4.16   2 0.00000 0.00000 0.00000 0.00000 0.00000 0.00000
   7   1  -3  203.99    5.43   2 0.00000 0.00000 0.00000 0.00000 0.00000 0.00000
   6   1  -2  539.70    6.36   2 0.00000 0.00000 0.00000 0.00000 0.00000 0.00000
   5   1  -1  213.58    3.79  -1 0.00000 0.00000 0.00000 0.00000 0.00000 0.00000
   3   1   3  213.58    3.79   2 0.00000 0.00000 0.00000 0.00000 0.00000 0.00000
   4   1   0   23.94    1.73  -1 0.00000 0.00000 0.00000 0.00000 0.00000 0.00000
   3   1   2   23.94    1.73   2 0.00000 0.00000 0.00000 0.00000 0.00000 0.00000
   3   1   1 3897.74   53.08  -1 0.00000 0.00000 0.00000 0.00000 0.00000 0.00000
   3   1   1 3897.74   53.08   2 0.00000 0.00000 0.00000 0.00000 0.00000 0.00000
   2   1   2   59.65    1.78   2 0.00000 0.00000 0.00000 0.00000 0.00000 0.00000
   1   1   3  473.58    4.18   2 0.00000 0.00000 0.00000 0.00000 0.00000 0.00000
   0   1   4  271.65    2.85   2 0.00000 0.00000 0.00000 0.00000 0.00000 0.00000
  -1   1   5    0.28    0.66   2 0.00000 0.00000 0.00000 0.00000 0.00000 0.00000
  -2   1   6  578.67    4.38   2 0.00000 0.00000 0.00000 0.00000 0.00000 0.00000
  -3   1   7  836.33    8.62  -1 0.00000 0.00000 0.00000 0.00000 0.00000 0.00000
  -4  -1   7  836.33    8.62   2 0.00000 0.00000 0.00000 0.00000 0.00000 0.00000
  -4   1   8 1323.60   12.68  -1 0.00000 0.00000 0.00000 0.00000 0.00000 0.00000
  -4  -1   8 1323.60   12.68   2 0.00000 0.00000 0.00000 0.00000 0.00000 0.00000
  -5   1   9  772.49   11.99  -1 0.00000 0.00000 0.00000 0.00000 0.00000 0.00000
  -4  -1   9  772.49   11.99   2 0.00000 0.00000 0.00000 0.00000 0.00000 0.00000
  -6   1  10  327.19    5.35   2 0.00000 0.00000 0.00000 0.00000 0.00000 0.00000
  -7   1  11    5.94    1.83   2 0.00000 0.00000 0.00000 0.00000 0.00000 0.00000
  -8   1  12    3.68    1.94   2 0.00000 0.00000 0.00000 0.00000 0.00000 0.00000
  -9   1  13  152.07    4.54   2 0.00000 0.00000 0.00000 0.00000 0.00000 0.00000
  11   0  -6  197.34    6.09  -1 0.00000 0.00000 0.00000 0.00000 0.00000 0.00000
   3   0  10  197.34    6.09   2 0.00000 0.00000 0.00000 0.00000 0.00000 0.00000
  10   0  -5   86.20    4.81  -1 0.00000 0.00000 0.00000 0.00000 0.00000 0.00000
   3   0   9   86.20    4.81   2 0.00000 0.00000 0.00000 0.00000 0.00000 0.00000
   9   0  -4  124.74    5.58  -1 0.00000 0.00000 0.00000 0.00000 0.00000 0.00000
   3   0   8  124.74    5.58   2 0.00000 0.00000 0.00000 0.00000 0.00000 0.00000
   9   0  -4   52.15    3.84   2 0.00000 0.00000 0.00000 0.00000 0.00000 0.00000
   8   0  -3  536.93    6.88   2 0.00000 0.00000 0.00000 0.00000 0.00000 0.00000
   7   0  -2    3.12    1.08   2 0.00000 0.00000 0.00000 0.00000 0.00000 0.00000
   6   0  -1   34.84    1.85   2 0.00000 0.00000 0.00000 0.00000 0.00000 0.00000
   5   0   0  449.60    5.33   2 0.00000 0.00000 0.00000 0.00000 0.00000 0.00000
   4   0   1   11.40    1.13   2 0.00000 0.00000 0.00000 0.00000 0.00000 0.00000
   3   0   2 1809.51   15.83  -1 0.00000 0.00000 0.00000 0.00000 0.00000 0.00000
   4   0   0 1809.51   15.83   2 0.00000 0.00000 0.00000 0.00000 0.00000 0.00000
   2   0   3  313.11    3.83   2 0.00000 0.00000 0.00000 0.00000 0.00000 0.00000
   1   0   4    2.42    0.70   2 0.00000 0.00000 0.00000 0.00000 0.00000 0.00000
   0   0   5  457.14    4.31   2 0.00000 0.00000 0.00000 0.00000 0.00000 0.00000
  -1   0   6   82.13    1.34   2 0.00000 0.00000 0.00000 0.00000 0.00000 0.00000
  -2   0   7    2.75    0.70   2 0.00000 0.00000 0.00000 0.00000 0.00000 0.00000
  -3   0   8   30.50    1.72   2 0.00000 0.00000 0.00000 0.00000 0.00000 0.00000
  -4   0   9  560.34    7.13  -1 0.00000 0.00000 0.00000 0.00000 0.00000 0.00000
  -5   0   9  560.34    7.13   2 0.00000 0.00000 0.00000 0.00000 0.00000 0.00000
  -5   0  10  218.48    4.33  -1 0.00000 0.00000 0.00000 0.00000 0.00000 0.00000
  -5   0  10  218.48    4.33   2 0.00000 0.00000 0.00000 0.00000 0.00000 0.00000
  -6   0  11  342.51    6.10  -1 0.00000 0.00000 0.00000 0.00000 0.00000 0.00000
  -5   0  11  342.51    6.10   2 0.00000 0.00000 0.00000 0.00000 0.00000 0.00000
  -7   0  12  203.06    4.61   2 0.00000 0.00000 0.00000 0.00000 0.00000 0.00000
  -8   0  13   22.70    2.47   2 0.00000 0.00000 0.00000 0.00000 0.00000 0.00000
  -9   0  14   49.84    3.56   2 0.00000 0.00000 0.00000 0.00000 0.00000 0.00000
 -10   0  15   -2.68    2.31   2 0.00000 0.00000 0.00000 0.00000 0.00000 0.00000
  13  -1  -7   42.72    4.55   2 0.00000 0.00000 0.00000 0.00000 0.00000 0.00000
  12  -1  -6   65.03    4.64   2 0.00000 0.00000 0.00000 0.00000 0.00000 0.00000
  11  -1  -5   31.04    5.37  -1 0.00000 0.00000 0.00000 0.00000 0.00000 0.00000
   4  -1   9   31.04    5.37   2 0.00000 0.00000 0.00000 0.00000 0.00000 0.00000
  11  -1  -5   17.84    2.71   2 0.00000 0.00000 0.00000 0.00000 0.00000 0.00000
  10  -1  -4  115.89    5.14  -1 0.00000 0.00000 0.00000 0.00000 0.00000 0.00000
   4  -1   8  115.89    5.14   2 0.00000 0.00000 0.00000 0.00000 0.00000 0.00000
   9  -1  -3   60.73    3.99  -1 0.00000 0.00000 0.00000 0.00000 0.00000 0.00000
   4  -1   7   60.73    3.99   2 0.00000 0.00000 0.00000 0.00000 0.00000 0.00000
   8  -1  -2  824.40   12.83  -1 0.00000 0.00000 0.00000 0.00000 0.00000 0.00000
   4  -1   6  824.40   12.83   2 0.00000 0.00000 0.00000 0.00000 0.00000 0.00000
   8  -1  -2  307.02    4.87   2 0.00000 0.00000 0.00000 0.00000 0.00000 0.00000
   7  -1  -1    8.51    1.15   2 0.00000 0.00000 0.00000 0.00000 0.00000 0.00000
   6  -1   0   43.42    1.94   2 0.00000 0.00000 0.00000 0.00000 0.00000 0.00000
   5  -1   1 1055.51   10.18   2 0.00000 0.00000 0.00000 0.00000 0.00000 0.00000
   4  -1   2   40.43    2.58   2 0.00000 0.00000 0.00000 0.00000 0.00000 0.00000
   3  -1   3  344.41    5.89   2 0.00000 0.00000 0.00000 0.00000 0.00000 0.00000
   2  -1   4 3271.64   18.96  -1 0.00000 0.00000 0.00000 0.00000 0.00000 0.00000
   5  -1  -2 3271.64   18.96   2 0.00000 0.00000 0.00000 0.00000 0.00000 0.00000
   1  -1   5  576.26    4.84  -1 0.00000 0.00000 0.00000 0.00000 0.00000 0.00000
   5  -1  -3  576.26    4.84   2 0.00000 0.00000 0.00000 0.00000 0.00000 0.00000
   0  -1   6  367.00    3.01   2 0.00000 0.00000 0.00000 0.00000 0.00000 0.00000
  -1  -1   7   24.90    1.44   2 0.00000 0.00000 0.00000 0.00000 0.00000 0.00000
  -2  -1   8    1.93    0.91   2 0.00000 0.00000 0.00000 0.00000 0.00000 0.00000
  -3  -1   9    0.87    1.03   2 0.00000 0.00000 0.00000 0.00000 0.00000 0.00000
  -4  -1  10  427.61    4.89   2 0.00000 0.00000 0.00000 0.00000 0.00000 0.00000
  -5  -1  11   -5.45    4.87  -1 0.00000 0.00000 0.00000 0.00000 0.00000 0.00000
  -6   1  11   -5.45    4.87   2 0.00000 0.00000 0.00000 0.00000 0.00000 0.00000
  -6  -1  12   30.99    3.12  -1 0.00000 0.00000 0.00000 0.00000 0.00000 0.00000
  -6   1  12   30.99    3.12   2 0.00000 0.00000 0.00000 0.00000 0.00000 0.00000
  -7  -1  13  655.45    8.93  -1 0.00000 0.00000 0.00000 0.00000 0.00000 0.00000
  -6   1  13  655.45    8.93   2 0.00000 0.00000 0.00000 0.00000 0.00000 0.00000
  -8  -1  14   20.59    2.52   2 0.00000 0.00000 0.00000 0.00000 0.00000 0.00000
  -9  -1  15   17.32    2.58   2 0.00000 0.00000 0.00000 0.00000 0.00000 0.00000
  13  -2  -6   94.52    5.50   2 0.00000 0.00000 0.00000 0.00000 0.00000 0.00000
  12  -2  -5    3.30    2.37   2 0.00000 0.00000 0.00000 0.00000 0.00000 0.00000
  11  -2  -4   28.60    2.63   2 0.00000 0.00000 0.00000 0.00000 0.00000 0.00000
  10  -2  -3  228.34    4.55   2 0.00000 0.00000 0.00000 0.00000 0.00000 0.00000
   9  -2  -2   74.24    4.80  -1 0.00000 0.00000 0.00000 0.00000 0.00000 0.00000
   5  -2   6   74.24    4.80   2 0.00000 0.00000 0.00000 0.00000 0.00000 0.00000
   8  -2  -1  165.94    4.93  -1 0.00000 0.00000 0.00000 0.00000 0.00000 0.00000
   5  -2   5  165.94    4.93   2 0.00000 0.00000 0.00000 0.00000 0.00000 0.00000
   7  -2   0   88.61    4.48  -1 0.00000 0.00000 0.00000 0.00000 0.00000 0.00000
   5  -2   4   88.61    4.48   2 0.00000 0.00000 0.00000 0.00000 0.00000 0.00000
   6  -2   1   41.63    1.95   2 0.00000 0.00000 0.00000 0.00000 0.00000 0.00000
   5  -2   2  395.39    7.05   2 0.00000 0.00000 0.00000 0.00000 0.00000 0.00000
   4  -2   3  334.79    6.16   2 0.00000 0.00000 0.00000 0.00000 0.00000 0.00000
   3  -2   4    6.78    0.84   2 0.00000 0.00000 0.00000 0.00000 0.00000 0.00000
   2  -2   5 1424.06   10.26   2 0.00000 0.00000 0.00000 0.00000 0.00000 0.00000
   1  -2   6   85.55    2.57  -1 0.00000 0.00000 0.00000 0.00000 0.00000 0.00000
   6  -2  -4   85.55    2.57   2 0.00000 0.00000 0.00000 0.00000 0.00000 0.00000
   0  -2   7  616.20    6.46  -1 0.00000 0.00000 0.00000 0.00000 0.00000 0.00000
  -6   2   5  616.20    6.46   2 0.00000 0.00000 0.00000 0.00000 0.00000 0.00000
  -1  -2   8  278.83    4.37  -1 0.00000 0.00000 0.00000 0.00000 0.00000 0.00000
  -6   2   6  278.83    4.37   2 0.00000 0.00000 0.00000 0.00000 0.00000 0.00000
  -2  -2   9   65.67    2.08   2 0.00000 0.00000 0.00000 0.00000 0.00000 0.00000
  -3  -2  10  130.09    2.74   2 0.00000 0.00000 0.00000 0.00000 0.00000 0.00000
  -4  -2  11   35.55    2.21   2 0.00000 0.00000 0.00000 0.00000 0.00000 0.00000
  -5  -2  12   81.68    2.69   2 0.00000 0.00000 0.00000 0.00000 0.00000 0.00000
  -6  -2  13   30.98    2.47   2 0.00000 0.00000 0.00000 0.00000 0.00000 0.00000
  -7  -2  14  283.85    6.09  -1 0.00000 0.00000 0.00000 0.00000 0.00000 0.00000
  -7   2  14  283.85    6.09   2 0.00000 0.00000 0.00000 0.00000 0.00000 0.00000
  -8  -2  15    1.06    4.99  -1 0.00000 0.00000 0.00000 0.00000 0.00000 0.00000
  -7   2  15    1.06    4.99   2 0.00000 0.00000 0.00000 0.00000 0.00000 0.00000
  13  -3  -5   65.15    4.89   2 0.00000 0.00000 0.00000 0.00000 0.00000 0.00000
  13  -3  -5  193.47    7.98  -1 0.00000 0.00000 0.00000 0.00000 0.00000 0.00000
   5  -3  11  193.47    7.98   2 0.00000 0.00000 0.00000 0.00000 0.00000 0.00000
  12  -3  -4   69.65    3.33   2 0.00000 0.00000 0.00000 0.00000 0.00000 0.00000
  11  -3  -3  100.19    3.45   2 0.00000 0.00000 0.00000 0.00000 0.00000 0.00000
  10  -3  -2  134.80    3.61   2 0.00000 0.00000 0.00000 0.00000 0.00000 0.00000
   9  -3  -1   31.50    2.29   2 0.00000 0.00000 0.00000 0.00000 0.00000 0.00000
   8  -3   0   38.39    4.31  -1 0.00000 0.00000 0.00000 0.00000 0.00000 0.00000
   6  -3   4   38.39    4.31   2 0.00000 0.00000 0.00000 0.00000 0.00000 0.00000
   8  -3   0   17.38    1.99   2 0.00000 0.00000 0.00000 0.00000 0.00000 0.00000
   7  -3   1  654.51   10.74  -1 0.00000 0.00000 0.00000 0.00000 0.00000 0.00000
   6  -3   3  654.51   10.74   2 0.00000 0.00000 0.00000 0.00000 0.00000 0.00000
   6  -3   2   26.78    3.22  -1 0.00000 0.00000 0.00000 0.00000 0.00000 0.00000
   6  -3   2   26.78    3.22   2 0.00000 0.00000 0.00000 0.00000 0.00000 0.00000
   5  -3   3  139.32    1.74   2 0.00000 0.00000 0.00000 0.00000 0.00000 0.00000
   4  -3   4  106.09    1.60   2 0.00000 0.00000 0.00000 0.00000 0.00000 0.00000
   3  -3   5  116.62    1.77   2 0.00000 0.00000 0.00000 0.00000 0.00000 0.00000
   2  -3   6  813.01    4.99   2 0.00000 0.00000 0.00000 0.00000 0.00000 0.00000
   1  -3   7   50.65    1.42   2 0.00000 0.00000 0.00000 0.00000 0.00000 0.00000
   0  -3   8  166.20    5.36  -1 0.00000 0.00000 0.00000 0.00000 0.00000 0.00000
  -7   3   6  166.20    5.36   2 0.00000 0.00000 0.00000 0.00000 0.00000 0.00000
  -1  -3   9  446.31    5.68  -1 0.00000 0.00000 0.00000 0.00000 0.00000 0.00000
  -7   3   7  446.31    5.68   2 0.00000 0.00000 0.00000 0.00000 0.00000 0.00000
  -2  -3  10  358.70    5.40  -1 0.00000 0.00000 0.00000 0.00000 0.00000 0.00000
  -7   3   8  358.70    5.40   2 0.00000 0.00000 0.00000 0.00000 0.00000 0.00000
  -3  -3  11  168.79    4.05   2 0.00000 0.00000 0.00000 0.00000 0.00000 0.00000
  -4  -3  12    7.86    2.00   2 0.00000 0.00000 0.00000 0.00000 0.00000 0.00000
  -5  -3  13  160.88    4.40   2 0.00000 0.00000 0.00000 0.00000 0.00000 0.00000
  -6  -3  14   25.09    2.77   2 0.00000 0.00000 0.00000 0.00000 0.00000 0.00000
  -7  -3  15   30.74    3.49   2 0.00000 0.00000 0.00000 0.00000 0.00000 0.00000
  13  -4  -4  182.82    6.71  -1 0.00000 0.00000 0.00000 0.00000 0.00000 0.00000
   6  -4  10  182.82    6.71   2 0.00000 0.00000 0.00000 0.00000 0.00000 0.00000
  12  -4  -3  263.77    8.16  -1 0.00000 0.00000 0.00000 0.00000 0.00000 0.00000
   6  -4   9  263.77    8.16   2 0.00000 0.00000 0.00000 0.00000 0.00000 0.00000
  11  -4  -2   94.59    3.39   2 0.00000 0.00000 0.00000 0.00000 0.00000 0.00000
  10  -4  -1  184.54    4.05   2 0.00000 0.00000 0.00000 0.00000 0.00000 0.00000
   9  -4   0   15.85    1.59   2 0.00000 0.00000 0.00000 0.00000 0.00000 0.00000
   8  -4   1   32.90    1.35   2 0.00000 0.00000 0.00000 0.00000 0.00000 0.00000
   7  -4   2  300.08    2.89   2 0.00000 0.00000 0.00000 0.00000 0.00000 0.00000
   6  -4   3   43.86    1.58  -1 0.00000 0.00000 0.00000 0.00000 0.00000 0.00000
   7  -4   1   43.86    1.58   2 0.00000 0.00000 0.00000 0.00000 0.00000 0.00000
   5  -4   4   48.04    1.46  -1 0.00000 0.00000 0.00000 0.00000 0.00000 0.00000
   7  -4   0   48.04    1.46   2 0.00000 0.00000 0.00000 0.00000 0.00000 0.00000
   4  -4   5  425.48    7.28  -1 0.00000 0.00000 0.00000 0.00000 0.00000 0.00000
   7  -4  -1  425.48    7.28   2 0.00000 0.00000 0.00000 0.00000 0.00000 0.00000
   4  -4   5  296.19    3.10   2 0.00000 0.00000 0.00000 0.00000 0.00000 0.00000
   3  -4   6  123.81    2.06   2 0.00000 0.00000 0.00000 0.00000 0.00000 0.00000
   2  -4   7  502.06    4.88   2 0.00000 0.00000 0.00000 0.00000 0.00000 0.00000
   1  -4   8    1.60    0.96   2 0.00000 0.00000 0.00000 0.00000 0.00000 0.00000
   0  -4   9   76.85    2.78   2 0.00000 0.00000 0.00000 0.00000 0.00000 0.00000
  -1  -4  10  637.66   11.28  -1 0.00000 0.00000 0.00000 0.00000 0.00000 0.00000
  -8   4   8  637.66   11.28   2 0.00000 0.00000 0.00000 0.00000 0.00000 0.00000
  -1  -4  10  385.44    5.72   2 0.00000 0.00000 0.00000 0.00000 0.00000 0.00000
  -2  -4  11  192.73    4.32  -1 0.00000 0.00000 0.00000 0.00000 0.00000 0.00000
  -8   4   9  192.73    4.32   2 0.00000 0.00000 0.00000 0.00000 0.00000 0.00000
  -3  -4  12   11.42    3.23  -1 0.00000 0.00000 0.00000 0.00000 0.00000 0.00000
  -8   4  10   11.42    3.23   2 0.00000 0.00000 0.00000 0.00000 0.00000 0.00000
  -4  -4  13   39.62    3.05   2 0.00000 0.00000 0.00000 0.00000 0.00000 0.00000
  -5  -4  14   91.57    3.91   2 0.00000 0.00000 0.00000 0.00000 0.00000 0.00000
  -6  -4  15    7.55    2.46   2 0.00000 0.00000 0.00000 0.00000 0.00000 0.00000
  13  -5  -3   59.03    5.82  -1 0.00000 0.00000 0.00000 0.00000 0.00000 0.00000
   7  -5   9   59.03    5.82   2 0.00000 0.00000 0.00000 0.00000 0.00000 0.00000
  12  -5  -2  370.91    8.95  -1 0.00000 0.00000 0.00000 0.00000 0.00000 0.00000
   7  -5   8  370.91    8.95   2 0.00000 0.00000 0.00000 0.00000 0.00000 0.00000
  11  -5  -1  232.14    7.45  -1 0.00000 0.00000 0.00000 0.00000 0.00000 0.00000
   7  -5   7  232.14    7.45   2 0.00000 0.00000 0.00000 0.00000 0.00000 0.00000
  10  -5   0  266.78    3.42   2 0.00000 0.00000 0.00000 0.00000 0.00000 0.00000
   9  -5   1  155.46    2.95   2 0.00000 0.00000 0.00000 0.00000 0.00000 0.00000
   8  -5   2    9.98    1.17   2 0.00000 0.00000 0.00000 0.00000 0.00000 0.00000
   7  -5   3  141.36    4.95   2 0.00000 0.00000 0.00000 0.00000 0.00000 0.00000
   6  -5   4   22.63    3.15   2 0.00000 0.00000 0.00000 0.00000 0.00000 0.00000
   5  -5   5   -5.22    2.24  -1 0.00000 0.00000 0.00000 0.00000 0.00000 0.00000
   8  -5  -1   -5.22    2.24   2 0.00000 0.00000 0.00000 0.00000 0.00000 0.00000
   4  -5   6 1240.94    8.35  -1 0.00000 0.00000 0.00000 0.00000 0.00000 0.00000
   8  -5  -2 1240.94    8.35   2 0.00000 0.00000 0.00000 0.00000 0.00000 0.00000
   3  -5   7  657.08    6.07  -1 0.00000 0.00000 0.00000 0.00000 0.00000 0.00000
   8  -5  -3  657.08    6.07   2 0.00000 0.00000 0.00000 0.00000 0.00000 0.00000
   2  -5   8    3.58    1.07   2 0.00000 0.00000 0.00000 0.00000 0.00000 0.00000
   1  -5   9   23.91    1.85   2 0.00000 0.00000 0.00000 0.00000 0.00000 0.00000
   0  -5  10  268.99    3.79   2 0.00000 0.00000 0.00000 0.00000 0.00000 0.00000
  -1  -5  11  137.70    2.94   2 0.00000 0.00000 0.00000 0.00000 0.00000 0.00000
  -2  -5  12    5.87    1.45   2 0.00000 0.00000 0.00000 0.00000 0.00000 0.00000
  -3  -5  13   87.11    6.51  -1 0.00000 0.00000 0.00000 0.00000 0.00000 0.00000
  -9   5  11   87.11    6.51   2 0.00000 0.00000 0.00000 0.00000 0.00000 0.00000
  -4  -5  14   73.01    5.96  -1 0.00000 0.00000 0.00000 0.00000 0.00000 0.00000
  -9   5  12   73.01    5.96   2 0.00000 0.00000 0.00000 0.00000 0.00000 0.00000
  -5  -5  15  250.02    9.57  -1 0.00000 0.00000 0.00000 0.00000 0.00000 0.00000
  -9   5  13  250.02    9.57   2 0.00000 0.00000 0.00000 0.00000 0.00000 0.00000
  13  -6  -2   31.40    3.00   2 0.00000 0.00000 0.00000 0.00000 0.00000 0.00000
  12  -6  -1  408.14   10.41  -1 0.00000 0.00000 0.00000 0.00000 0.00000 0.00000
   8  -6   7  408.14   10.41   2 0.00000 0.00000 0.00000 0.00000 0.00000 0.00000
  11  -6   0   63.05    4.82  -1 0.00000 0.00000 0.00000 0.00000 0.00000 0.00000
   8  -6   6   63.05    4.82   2 0.00000 0.00000 0.00000 0.00000 0.00000 0.00000
  10  -6   1  136.39    5.86  -1 0.00000 0.00000 0.00000 0.00000 0.00000 0.00000
   8  -6   5  136.39    5.86   2 0.00000 0.00000 0.00000 0.00000 0.00000 0.00000
   9  -6   2  361.24    4.91   2 0.00000 0.00000 0.00000 0.00000 0.00000 0.00000
   8  -6   3    5.92    2.16   2 0.00000 0.00000 0.00000 0.00000 0.00000 0.00000
   7  -6   4   18.87    2.54   2 0.00000 0.00000 0.00000 0.00000 0.00000 0.00000
   6  -6   5   20.03    3.32   2 0.00000 0.00000 0.00000 0.00000 0.00000 0.00000
   5  -6   6   38.71    3.58   2 0.00000 0.00000 0.00000 0.00000 0.00000 0.00000
   4  -6   7 1370.86   19.12  -1 0.00000 0.00000 0.00000 0.00000 0.00000 0.00000
   9  -6  -3 1370.86   19.12   2 0.00000 0.00000 0.00000 0.00000 0.00000 0.00000
   3  -6   8  542.07    5.52  -1 0.00000 0.00000 0.00000 0.00000 0.00000 0.00000
  -9   6   4  542.07    5.52   2 0.00000 0.00000 0.00000 0.00000 0.00000 0.00000
   2  -6   9  351.32    4.50  -1 0.00000 0.00000 0.00000 0.00000 0.00000 0.00000
  -9   6   5  351.32    4.50   2 0.00000 0.00000 0.00000 0.00000 0.00000 0.00000
   1  -6  10  342.56    4.43   2 0.00000 0.00000 0.00000 0.00000 0.00000 0.00000
   0  -6  11   41.28    2.24   2 0.00000 0.00000 0.00000 0.00000 0.00000 0.00000
  -1  -6  12    5.86    1.46   2 0.00000 0.00000 0.00000 0.00000 0.00000 0.00000
  -2  -6  13   26.95    2.31   2 0.00000 0.00000 0.00000 0.00000 0.00000 0.00000
  -3  -6  14  255.10    4.39   2 0.00000 0.00000 0.00000 0.00000 0.00000 0.00000
  -4  -6  15    1.57    7.03  -1 0.00000 0.00000 0.00000 0.00000 0.00000 0.00000
 -10   6  13    1.57    7.03   2 0.00000 0.00000 0.00000 0.00000 0.00000 0.00000
  13  -7  -1    7.43    1.93   2 0.00000 0.00000 0.00000 0.00000 0.00000 0.00000
  12  -7   0  148.70    3.37   2 0.00000 0.00000 0.00000 0.00000 0.00000 0.00000
  11  -7   1   28.90    2.23   2 0.00000 0.00000 0.00000 0.00000 0.00000 0.00000
  10  -7   2    4.40    4.00  -1 0.00000 0.00000 0.00000 0.00000 0.00000 0.00000
   9  -7   4    4.40    4.00   2 0.00000 0.00000 0.00000 0.00000 0.00000 0.00000
   9  -7   3 1007.58   10.31  -1 0.00000 0.00000 0.00000 0.00000 0.00000 0.00000
   9  -7   3 1007.58   10.31   2 0.00000 0.00000 0.00000 0.00000 0.00000 0.00000
   8  -7   4   24.69    4.78  -1 0.00000 0.00000 0.00000 0.00000 0.00000 0.00000
   9  -7   2   24.69    4.78   2 0.00000 0.00000 0.00000 0.00000 0.00000 0.00000
   7  -7   5    4.51    2.16   2 0.00000 0.00000 0.00000 0.00000 0.00000 0.00000
   6  -7   6   39.76    3.80   2 0.00000 0.00000 0.00000 0.00000 0.00000 0.00000
   5  -7   7  182.91    5.77   2 0.00000 0.00000 0.00000 0.00000 0.00000 0.00000
   4  -7   8   64.96    4.18   2 0.00000 0.00000 0.00000 0.00000 0.00000 0.00000
   3  -7   9   37.40    2.56   2 0.00000 0.00000 0.00000 0.00000 0.00000 0.00000
   2  -7  10  257.26    4.09  -1 0.00000 0.00000 0.00000 0.00000 0.00000 0.00000
 -10   7   6  257.26    4.09   2 0.00000 0.00000 0.00000 0.00000 0.00000 0.00000
   1  -7  11  492.55    6.95  -1 0.00000 0.00000 0.00000 0.00000 0.00000 0.00000
 -10   7   7  492.55    6.95   2 0.00000 0.00000 0.00000 0.00000 0.00000 0.00000
   0  -7  12  350.11    6.27  -1 0.00000 0.00000 0.00000 0.00000 0.00000 0.00000
 -10   7   8  350.11    6.27   2 0.00000 0.00000 0.00000 0.00000 0.00000 0.00000
  -1  -7  13    4.43    1.56   2 0.00000 0.00000 0.00000 0.00000 0.00000 0.00000
  -2  -7  14   65.26    2.88   2 0.00000 0.00000 0.00000 0.00000 0.00000 0.00000
  -3  -7  15  146.91    3.73   2 0.00000 0.00000 0.00000 0.00000 0.00000 0.00000
  13  -8   0   12.55    1.68   2 0.00000 0.00000 0.00000 0.00000 0.00000 0.00000
  12  -8   1  105.90    3.10   2 0.00000 0.00000 0.00000 0.00000 0.00000 0.00000
  11  -8   2  205.25    3.98   2 0.00000 0.00000 0.00000 0.00000 0.00000 0.00000
  10  -8   3   11.54    1.57   2 0.00000 0.00000 0.00000 0.00000 0.00000 0.00000
   9  -8   4  461.99   10.34  -1 0.00000 0.00000 0.00000 0.00000 0.00000 0.00000
  10  -8   2  461.99   10.34   2 0.00000 0.00000 0.00000 0.00000 0.00000 0.00000
   8  -8   5    7.37    3.34  -1 0.00000 0.00000 0.00000 0.00000 0.00000 0.00000
  10  -8   1    7.37    3.34   2 0.00000 0.00000 0.00000 0.00000 0.00000 0.00000
   7  -8   6   14.04    4.00  -1 0.00000 0.00000 0.00000 0.00000 0.00000 0.00000
  10  -8   0   14.04    4.00   2 0.00000 0.00000 0.00000 0.00000 0.00000 0.00000
   6  -8   7  309.34    7.74   2 0.00000 0.00000 0.00000 0.00000 0.00000 0.00000
   5  -8   8    1.00    2.22   2 0.00000 0.00000 0.00000 0.00000 0.00000 0.00000
   4  -8   9    6.20    2.52   2 0.00000 0.00000 0.00000 0.00000 0.00000 0.00000
   3  -8  10  116.74    3.54   2 0.00000 0.00000 0.00000 0.00000 0.00000 0.00000
   2  -8  11  147.95    3.24   2 0.00000 0.00000 0.00000 0.00000 0.00000 0.00000
   1  -8  12   13.36    3.68  -1 0.00000 0.00000 0.00000 0.00000 0.00000 0.00000
 -11   8   8   13.36    3.68   2 0.00000 0.00000 0.00000 0.00000 0.00000 0.00000
   0  -8  13  138.93    4.14  -1 0.00000 0.00000 0.00000 0.00000 0.00000 0.00000
 -11   8   9  138.93    4.14   2 0.00000 0.00000 0.00000 0.00000 0.00000 0.00000
  -1  -8  14   73.35    5.96  -1 0.00000 0.00000 0.00000 0.00000 0.00000 0.00000
 -11   8  10   73.35    5.96   2 0.00000 0.00000 0.00000 0.00000 0.00000 0.00000
  -2  -8  15  133.21    4.46   2 0.00000 0.00000 0.00000 0.00000 0.00000 0.00000
  12  -9   2    5.42    1.59   2 0.00000 0.00000 0.00000 0.00000 0.00000 0.00000
  11  -9   3  169.18    3.85   2 0.00000 0.00000 0.00000 0.00000 0.00000 0.00000
  10  -9   4    9.13    2.86   2 0.00000 0.00000 0.00000 0.00000 0.00000 0.00000
   9  -9   5   29.21    4.02   2 0.00000 0.00000 0.00000 0.00000 0.00000 0.00000
   7  -9   7  112.85    5.24  -1 0.00000 0.00000 0.00000 0.00000 0.00000 0.00000
  11  -9  -1  112.85    5.24   2 0.00000 0.00000 0.00000 0.00000 0.00000 0.00000
   6  -9   8  726.61    8.96  -1 0.00000 0.00000 0.00000 0.00000 0.00000 0.00000
  11  -9  -2  726.61    8.96   2 0.00000 0.00000 0.00000 0.00000 0.00000 0.00000
   5  -9   9   -1.77    2.32   2 0.00000 0.00000 0.00000 0.00000 0.00000 0.00000
   4  -9  10    4.16    2.68   2 0.00000 0.00000 0.00000 0.00000 0.00000 0.00000
   3  -9  11  115.85    5.65   2 0.00000 0.00000 0.00000 0.00000 0.00000 0.00000
   2  -9  12   74.70    3.46   2 0.00000 0.00000 0.00000 0.00000 0.00000 0.00000
   1  -9  13    6.81    2.07   2 0.00000 0.00000 0.00000 0.00000 0.00000 0.00000
   0  -9  14   21.05    6.44  -1 0.00000 0.00000 0.00000 0.00000 0.00000 0.00000
 -12   9  10   21.05    6.44   2 0.00000 0.00000 0.00000 0.00000 0.00000 0.00000
  11 -10   4   98.15    3.29   2 0.00000 0.00000 0.00000 0.00000 0.00000 0.00000
  10 -10   5    0.42    2.79   2 0.00000 0.00000 0.00000 0.00000 0.00000 0.00000
   9 -10   6    3.95    2.83   2 0.00000 0.00000 0.00000 0.00000 0.00000 0.00000
   8 -10   7  106.62    5.63   2 0.00000 0.00000 0.00000 0.00000 0.00000 0.00000
   7 -10   8   12.02    3.11   2 0.00000 0.00000 0.00000 0.00000 0.00000 0.00000
   6 -10   9   64.47    3.67  -1 0.00000 0.00000 0.00000 0.00000 0.00000 0.00000
 -12  10   3   64.47    3.67   2 0.00000 0.00000 0.00000 0.00000 0.00000 0.00000
   5 -10  10  171.90    4.39  -1 0.00000 0.00000 0.00000 0.00000 0.00000 0.00000
 -12  10   4  171.90    4.39   2 0.00000 0.00000 0.00000 0.00000 0.00000 0.00000
   4 -10  11   77.45    5.83  -1 0.00000 0.00000 0.00000 0.00000 0.00000 0.00000
 -12  10   5   77.45    5.83   2 0.00000 0.00000 0.00000 0.00000 0.00000 0.00000
   3 -10  12   39.34    4.65   2 0.00000 0.00000 0.00000 0.00000 0.00000 0.00000
   2 -10  13   18.33    2.39   2 0.00000 0.00000 0.00000 0.00000 0.00000 0.00000
   9 -11   7   13.64    3.35   2 0.00000 0.00000 0.00000 0.00000 0.00000 0.00000
   8 -11   8  108.65    5.97   2 0.00000 0.00000 0.00000 0.00000 0.00000 0.00000
   7 -11   9   12.97    3.38   2 0.00000 0.00000 0.00000 0.00000 0.00000 0.00000
   6 -11  10   -2.57    2.89   2 0.00000 0.00000 0.00000 0.00000 0.00000 0.00000
   5 -11  11  148.48    6.65   2 0.00000 0.00000 0.00000 0.00000 0.00000 0.00000
  -4  15  -5    8.12    2.58   2 0.00000 0.00000 0.00000 0.00000 0.00000 0.00000
  -5  15  -4    3.10    2.50   2 0.00000 0.00000 0.00000 0.00000 0.00000 0.00000
  -6  15  -3   20.56    2.99   2 0.00000 0.00000 0.00000 0.00000 0.00000 0.00000
  -7  15  -2    3.17    2.44   2 0.00000 0.00000 0.00000 0.00000 0.00000 0.00000
  -1  14  -7  135.57    6.28  -1 0.00000 0.00000 0.00000 0.00000 0.00000 0.00000
  -6  14   3  135.57    6.28   2 0.00000 0.00000 0.00000 0.00000 0.00000 0.00000
  -1  14  -7   80.77    4.50   2 0.00000 0.00000 0.00000 0.00000 0.00000 0.00000
  -2  14  -6   80.46    5.03  -1 0.00000 0.00000 0.00000 0.00000 0.00000 0.00000
  -6  14   2   80.46    5.03   2 0.00000 0.00000 0.00000 0.00000 0.00000 0.00000
  -3  14  -5  170.29    5.65  -1 0.00000 0.00000 0.00000 0.00000 0.00000 0.00000
  -6  14   1  170.29    5.65   2 0.00000 0.00000 0.00000 0.00000 0.00000 0.00000
  -4  14  -4  110.29    5.64  -1 0.00000 0.00000 0.00000 0.00000 0.00000 0.00000
  -6  14   0  110.29    5.64   2 0.00000 0.00000 0.00000 0.00000 0.00000 0.00000
  -5  14  -3   -0.56    2.08   2 0.00000 0.00000 0.00000 0.00000 0.00000 0.00000
  -6  14  -2   99.77    4.82   2 0.00000 0.00000 0.00000 0.00000 0.00000 0.00000
  -7  14  -1   29.59    3.67   2 0.00000 0.00000 0.00000 0.00000 0.00000 0.00000
  -8  14   0    1.94    2.39   2 0.00000 0.00000 0.00000 0.00000 0.00000 0.00000
 -10  14   2  100.47    5.97  -1 0.00000 0.00000 0.00000 0.00000 0.00000 0.00000
  -5  14  -8  100.47    5.97   2 0.00000 0.00000 0.00000 0.00000 0.00000 0.00000
   1  13  -8    3.30    1.56   2 0.00000 0.00000 0.00000 0.00000 0.00000 0.00000
   0  13  -7   -0.55    1.98   2 0.00000 0.00000 0.00000 0.00000 0.00000 0.00000
  -1  13  -6  265.03    6.59   2 0.00000 0.00000 0.00000 0.00000 0.00000 0.00000
  -2  13  -5    1.29    2.01   2 0.00000 0.00000 0.00000 0.00000 0.00000 0.00000
  -3  13  -4  204.98    6.46  -1 0.00000 0.00000 0.00000 0.00000 0.00000 0.00000
  -5  13   0  204.98    6.46   2 0.00000 0.00000 0.00000 0.00000 0.00000 0.00000
  -4  13  -3  178.18    5.59  -1 0.00000 0.00000 0.00000 0.00000 0.00000 0.00000
  -5  13  -1  178.18    5.59   2 0.00000 0.00000 0.00000 0.00000 0.00000 0.00000
  -5  13  -2    5.06    3.61  -1 0.00000 0.00000 0.00000 0.00000 0.00000 0.00000
  -5  13  -2    5.06    3.61   2 0.00000 0.00000 0.00000 0.00000 0.00000 0.00000
  -6  13  -1  261.28    7.60  -1 0.00000 0.00000 0.00000 0.00000 0.00000 0.00000
  -5  13  -3  261.28    7.60   2 0.00000 0.00000 0.00000 0.00000 0.00000 0.00000
  -6  13  -1  121.96    4.79   2 0.00000 0.00000 0.00000 0.00000 0.00000 0.00000
  -7  13   0   72.47    4.20   2 0.00000 0.00000 0.00000 0.00000 0.00000 0.00000
  -8  13   1   17.24    2.76   2 0.00000 0.00000 0.00000 0.00000 0.00000 0.00000
  -9  13   2  114.48    5.16   2 0.00000 0.00000 0.00000 0.00000 0.00000 0.00000
 -10  13   3   95.22    5.15   2 0.00000 0.00000 0.00000 0.00000 0.00000 0.00000
 -11  13   4   25.36    5.66  -1 0.00000 0.00000 0.00000 0.00000 0.00000 0.00000
   4 -13  10   25.36    5.66   2 0.00000 0.00000 0.00000 0.00000 0.00000 0.00000
   3  12  -9   58.71    7.25  -1 0.00000 0.00000 0.00000 0.00000 0.00000 0.00000
  -5  12   7   58.71    7.25   2 0.00000 0.00000 0.00000 0.00000 0.00000 0.00000
   2  12  -8   39.85    5.50  -1 0.00000 0.00000 0.00000 0.00000 0.00000 0.00000
  -5  12   6   39.85    5.50   2 0.00000 0.00000 0.00000 0.00000 0.00000 0.00000
   1  12  -7  119.96    4.14  -1 0.00000 0.00000 0.00000 0.00000 0.00000 0.00000
  -5  12   5  119.96    4.14   2 0.00000 0.00000 0.00000 0.00000 0.00000 0.00000
   0  12  -6   32.38    3.21   2 0.00000 0.00000 0.00000 0.00000 0.00000 0.00000
  -1  12  -5  306.09    6.70   2 0.00000 0.00000 0.00000 0.00000 0.00000 0.00000
  -2  12  -4   20.78    3.06   2 0.00000 0.00000 0.00000 0.00000 0.00000 0.00000
  -3  12  -3   16.61    2.31   2 0.00000 0.00000 0.00000 0.00000 0.00000 0.00000
  -4  12  -2  323.51    7.03   2 0.00000 0.00000 0.00000 0.00000 0.00000 0.00000
  -5  12  -1   15.19    3.58  -1 0.00000 0.00000 0.00000 0.00000 0.00000 0.00000
  -4  12  -3   15.19    3.58   2 0.00000 0.00000 0.00000 0.00000 0.00000 0.00000
  -6  12   0   53.47    4.00  -1 0.00000 0.00000 0.00000 0.00000 0.00000 0.00000
  -4  12  -4   53.47    4.00   2 0.00000 0.00000 0.00000 0.00000 0.00000 0.00000
  -7  12   1  138.93    3.44  -1 0.00000 0.00000 0.00000 0.00000 0.00000 0.00000
  -4  12  -5  138.93    3.44   2 0.00000 0.00000 0.00000 0.00000 0.00000 0.00000
  -8  12   2   64.99    4.03   2 0.00000 0.00000 0.00000 0.00000 0.00000 0.00000
  -9  12   3  126.33    5.26   2 0.00000 0.00000 0.00000 0.00000 0.00000 0.00000
 -10  12   4   99.19    4.93   2 0.00000 0.00000 0.00000 0.00000 0.00000 0.00000
 -11  12   5   79.06    4.89   2 0.00000 0.00000 0.00000 0.00000 0.00000 0.00000
   4  11  -9   86.57    2.53   2 0.00000 0.00000 0.00000 0.00000 0.00000 0.00000
   3  11  -8   26.10    1.91   2 0.00000 0.00000 0.00000 0.00000 0.00000 0.00000
   2  11  -7   52.12    6.62  -1 0.00000 0.00000 0.00000 0.00000 0.00000 0.00000
  -4  11   5   52.12    6.62   2 0.00000 0.00000 0.00000 0.00000 0.00000 0.00000
   1  11  -6  524.23    8.14  -1 0.00000 0.00000 0.00000 0.00000 0.00000 0.00000
  -4  11   4  524.23    8.14   2 0.00000 0.00000 0.00000 0.00000 0.00000 0.00000
   0  11  -5   71.10    3.95  -1 0.00000 0.00000 0.00000 0.00000 0.00000 0.00000
  -4  11   3   71.10    3.95   2 0.00000 0.00000 0.00000 0.00000 0.00000 0.00000
  -1  11  -4  280.00    6.11   2 0.00000 0.00000 0.00000 0.00000 0.00000 0.00000
  -2  11  -3   51.66    3.29   2 0.00000 0.00000 0.00000 0.00000 0.00000 0.00000
  -3  11  -2   22.96    2.95   2 0.00000 0.00000 0.00000 0.00000 0.00000 0.00000
  -4  11  -1  563.93    9.40   2 0.00000 0.00000 0.00000 0.00000 0.00000 0.00000
  -5  11   0    5.23    1.79   2 0.00000 0.00000 0.00000 0.00000 0.00000 0.00000
  -6  11   1   13.21    2.33  -1 0.00000 0.00000 0.00000 0.00000 0.00000 0.00000
  -3  11  -5   13.21    2.33   2 0.00000 0.00000 0.00000 0.00000 0.00000 0.00000
  -7  11   2  227.06    3.51  -1 0.00000 0.00000 0.00000 0.00000 0.00000 0.00000
  -3  11  -6  227.06    3.51   2 0.00000 0.00000 0.00000 0.00000 0.00000 0.00000
  -8  11   3  172.90    3.61  -1 0.00000 0.00000 0.00000 0.00000 0.00000 0.00000
  -3  11  -7  172.90    3.61   2 0.00000 0.00000 0.00000 0.00000 0.00000 0.00000
  -9  11   4   72.57    4.20   2 0.00000 0.00000 0.00000 0.00000 0.00000 0.00000
 -10  11   5   42.07    3.94   2 0.00000 0.00000 0.00000 0.00000 0.00000 0.00000
 -11  11   6  171.26    6.17   2 0.00000 0.00000 0.00000 0.00000 0.00000 0.00000
 -12  11   7    2.73    2.80   2 0.00000 0.00000 0.00000 0.00000 0.00000 0.00000
   5  10  -9   78.88    2.38   2 0.00000 0.00000 0.00000 0.00000 0.00000 0.00000
   4  10  -8    2.83    1.13   2 0.00000 0.00000 0.00000 0.00000 0.00000 0.00000
   3  10  -7    0.52    1.04   2 0.00000 0.00000 0.00000 0.00000 0.00000 0.00000
   2  10  -6   -0.48    0.94   2 0.00000 0.00000 0.00000 0.00000 0.00000 0.00000
   1  10  -5  171.80    4.55  -1 0.00000 0.00000 0.00000 0.00000 0.00000 0.00000
  -3  10   3  171.80    4.55   2 0.00000 0.00000 0.00000 0.00000 0.00000 0.00000
   0  10  -4   89.44    3.61  -1 0.00000 0.00000 0.00000 0.00000 0.00000 0.00000
  -3  10   2   89.44    3.61   2 0.00000 0.00000 0.00000 0.00000 0.00000 0.00000
  -1  10  -3  226.12    5.20  -1 0.00000 0.00000 0.00000 0.00000 0.00000 0.00000
  -3  10   1  226.12    5.20   2 0.00000 0.00000 0.00000 0.00000 0.00000 0.00000
  -2  10  -2  652.27    9.92   2 0.00000 0.00000 0.00000 0.00000 0.00000 0.00000
  -3  10  -1   99.79    3.72   2 0.00000 0.00000 0.00000 0.00000 0.00000 0.00000
  -4  10   0  231.77    5.39   2 0.00000 0.00000 0.00000 0.00000 0.00000 0.00000
  -5  10   1    1.21    1.60   2 0.00000 0.00000 0.00000 0.00000 0.00000 0.00000
  -6  10   2   31.59    3.07   2 0.00000 0.00000 0.00000 0.00000 0.00000 0.00000
  -7  10   3  506.40    6.87  -1 0.00000 0.00000 0.00000 0.00000 0.00000 0.00000
  -2  10  -7  506.40    6.87   2 0.00000 0.00000 0.00000 0.00000 0.00000 0.00000
  -8  10   4   79.06    2.56  -1 0.00000 0.00000 0.00000 0.00000 0.00000 0.00000
   2 -10   8   79.06    2.56   2 0.00000 0.00000 0.00000 0.00000 0.00000 0.00000
  -9  10   5   42.91    2.51  -1 0.00000 0.00000 0.00000 0.00000 0.00000 0.00000
   2 -10   9   42.91    2.51   2 0.00000 0.00000 0.00000 0.00000 0.00000 0.00000
 -10  10   6   10.07    2.59   2 0.00000 0.00000 0.00000 0.00000 0.00000 0.00000
 -11  10   7  138.07    4.18   2 0.00000 0.00000 0.00000 0.00000 0.00000 0.00000
 -12  10   8    5.79    2.15   2 0.00000 0.00000 0.00000 0.00000 0.00000 0.00000
   6   9  -9  254.84    9.16  -1 0.00000 0.00000 0.00000 0.00000 0.00000 0.00000
  -3   9   9  254.84    9.16   2 0.00000 0.00000 0.00000 0.00000 0.00000 0.00000
   5   9  -8  155.52    8.19  -1 0.00000 0.00000 0.00000 0.00000 0.00000 0.00000
  -3   9   8  155.52    8.19   2 0.00000 0.00000 0.00000 0.00000 0.00000 0.00000
   4   9  -7   37.28    2.01   2 0.00000 0.00000 0.00000 0.00000 0.00000 0.00000
   3   9  -6  146.28    2.57   2 0.00000 0.00000 0.00000 0.00000 0.00000 0.00000
   2   9  -5   81.85    2.00   2 0.00000 0.00000 0.00000 0.00000 0.00000 0.00000
   1   9  -4   15.59    1.28   2 0.00000 0.00000 0.00000 0.00000 0.00000 0.00000
   0   9  -3   20.46    1.80   2 0.00000 0.00000 0.00000 0.00000 0.00000 0.00000
  -1   9  -2   92.99    3.70  -1 0.00000 0.00000 0.00000 0.00000 0.00000 0.00000
  -2   9   0   92.99    3.70   2 0.00000 0.00000 0.00000 0.00000 0.00000 0.00000
  -2   9  -1 2126.45   25.56  -1 0.00000 0.00000 0.00000 0.00000 0.00000 0.00000
  -2   9  -1 2126.45   25.56   2 0.00000 0.00000 0.00000 0.00000 0.00000 0.00000
  -3   9   0  126.88    4.27  -1 0.00000 0.00000 0.00000 0.00000 0.00000 0.00000
  -2   9  -2  126.88    4.27   2 0.00000 0.00000 0.00000 0.00000 0.00000 0.00000
  -3   9   0  100.99    3.46   2 0.00000 0.00000 0.00000 0.00000 0.00000 0.00000
  -4   9   1  173.41    4.44   2 0.00000 0.00000 0.00000 0.00000 0.00000 0.00000
  -5   9   2  103.59    3.75   2 0.00000 0.00000 0.00000 0.00000 0.00000 0.00000
  -6   9   3  143.57    4.43   2 0.00000 0.00000 0.00000 0.00000 0.00000 0.00000
  -7   9   4  247.08    5.84   2 0.00000 0.00000 0.00000 0.00000 0.00000 0.00000
  -8   9   5    3.96    1.98   2 0.00000 0.00000 0.00000 0.00000 0.00000 0.00000
  -9   9   6   57.26    3.24  -1 0.00000 0.00000 0.00000 0.00000 0.00000 0.00000
   1  -9  10   57.26    3.24   2 0.00000 0.00000 0.00000 0.00000 0.00000 0.00000
 -10   9   7  170.71    4.36  -1 0.00000 0.00000 0.00000 0.00000 0.00000 0.00000
   1  -9  11  170.71    4.36   2 0.00000 0.00000 0.00000 0.00000 0.00000 0.00000
 -11   9   8  264.18    5.87  -1 0.00000 0.00000 0.00000 0.00000 0.00000 0.00000
   1  -9  12  264.18    5.87   2 0.00000 0.00000 0.00000 0.00000 0.00000 0.00000
 -12   9   9   -1.04    2.04   2 0.00000 0.00000 0.00000 0.00000 0.00000 0.00000
   7   8  -9   54.01    3.02   2 0.00000 0.00000 0.00000 0.00000 0.00000 0.00000
   6   8  -8  292.98   10.52  -1 0.00000 0.00000 0.00000 0.00000 0.00000 0.00000
  -2   8   8  292.98   10.52   2 0.00000 0.00000 0.00000 0.00000 0.00000 0.00000
   5   8  -7   29.68    5.03  -1 0.00000 0.00000 0.00000 0.00000 0.00000 0.00000
  -2   8   7   29.68    5.03   2 0.00000 0.00000 0.00000 0.00000 0.00000 0.00000
   4   8  -6  243.48    8.50  -1 0.00000 0.00000 0.00000 0.00000 0.00000 0.00000
  -2   8   6  243.48    8.50   2 0.00000 0.00000 0.00000 0.00000 0.00000 0.00000
   2   8  -4   15.81    1.53   2 0.00000 0.00000 0.00000 0.00000 0.00000 0.00000
   1   8  -3  100.23    2.35   2 0.00000 0.00000 0.00000 0.00000 0.00000 0.00000
   0   8  -2   69.58    1.96   2 0.00000 0.00000 0.00000 0.00000 0.00000 0.00000
  -1   8  -1  154.56    2.50   2 0.00000 0.00000 0.00000 0.00000 0.00000 0.00000
  -2   8   0  606.59    8.64   2 0.00000 0.00000 0.00000 0.00000 0.00000 0.00000
  -3   8   1  291.22    3.23  -1 0.00000 0.00000 0.00000 0.00000 0.00000 0.00000
  -1   8  -3  291.22    3.23   2 0.00000 0.00000 0.00000 0.00000 0.00000 0.00000
  -4   8   2    7.84    1.70  -1 0.00000 0.00000 0.00000 0.00000 0.00000 0.00000
  -1   8  -4    7.84    1.70   2 0.00000 0.00000 0.00000 0.00000 0.00000 0.00000
  -5   8   3  364.88    6.65   2 0.00000 0.00000 0.00000 0.00000 0.00000 0.00000
  -6   8   4  112.48    3.98   2 0.00000 0.00000 0.00000 0.00000 0.00000 0.00000
  -7   8   5  154.17    4.72   2 0.00000 0.00000 0.00000 0.00000 0.00000 0.00000
  -8   8   6    6.20    2.07   2 0.00000 0.00000 0.00000 0.00000 0.00000 0.00000
  -9   8   7   77.91    3.11   2 0.00000 0.00000 0.00000 0.00000 0.00000 0.00000
 -10   8   8   91.08    3.25  -1 0.00000 0.00000 0.00000 0.00000 0.00000 0.00000
   0  -8  12   91.08    3.25   2 0.00000 0.00000 0.00000 0.00000 0.00000 0.00000
 -11   8   9  138.38    3.39  -1 0.00000 0.00000 0.00000 0.00000 0.00000 0.00000
   0  -8  13  138.38    3.39   2 0.00000 0.00000 0.00000 0.00000 0.00000 0.00000
 -12   8  10  143.91    4.13  -1 0.00000 0.00000 0.00000 0.00000 0.00000 0.00000
   0  -8  14  143.91    4.13   2 0.00000 0.00000 0.00000 0.00000 0.00000 0.00000
   8   7  -9   97.34    2.82   2 0.00000 0.00000 0.00000 0.00000 0.00000 0.00000
   7   7  -8   70.71    1.87   2 0.00000 0.00000 0.00000 0.00000 0.00000 0.00000
   6   7  -7  173.60    2.51   2 0.00000 0.00000 0.00000 0.00000 0.00000 0.00000
   5   7  -6   45.12    6.53  -1 0.00000 0.00000 0.00000 0.00000 0.00000 0.00000
  -1   7   6   45.12    6.53   2 0.00000 0.00000 0.00000 0.00000 0.00000 0.00000
   5   7  -6    3.56    0.79   2 0.00000 0.00000 0.00000 0.00000 0.00000 0.00000
   4   7  -5  173.85    4.10  -1 0.00000 0.00000 0.00000 0.00000 0.00000 0.00000
  -1   7   5  173.85    4.10   2 0.00000 0.00000 0.00000 0.00000 0.00000 0.00000
   3   7  -4  698.64    8.32  -1 0.00000 0.00000 0.00000 0.00000 0.00000 0.00000
  -1   7   4  698.64    8.32   2 0.00000 0.00000 0.00000 0.00000 0.00000 0.00000
   2   7  -3   15.17    1.41   2 0.00000 0.00000 0.00000 0.00000 0.00000 0.00000
   2   7  -3  119.43    6.08  -1 0.00000 0.00000 0.00000 0.00000 0.00000 0.00000
  -1   7   3  119.43    6.08   2 0.00000 0.00000 0.00000 0.00000 0.00000 0.00000
   1   7  -2   86.12    2.47   2 0.00000 0.00000 0.00000 0.00000 0.00000 0.00000
   0   7  -1  776.34    7.08   2 0.00000 0.00000 0.00000 0.00000 0.00000 0.00000
  -1   7   0   41.91    1.36   2 0.00000 0.00000 0.00000 0.00000 0.00000 0.00000
  -2   7   1  186.50    2.45   2 0.00000 0.00000 0.00000 0.00000 0.00000 0.00000
  -3   7   2  155.07    2.55   2 0.00000 0.00000 0.00000 0.00000 0.00000 0.00000
  -4   7   3   98.47    1.44  -1 0.00000 0.00000 0.00000 0.00000 0.00000 0.00000
   0   7  -5   98.47    1.44   2 0.00000 0.00000 0.00000 0.00000 0.00000 0.00000
  -5   7   4 1763.20   11.14  -1 0.00000 0.00000 0.00000 0.00000 0.00000 0.00000
   0   7  -6 1763.20   11.14   2 0.00000 0.00000 0.00000 0.00000 0.00000 0.00000
  -6   7   5  160.81    4.45   2 0.00000 0.00000 0.00000 0.00000 0.00000 0.00000
  -7   7   6    5.36    1.90   2 0.00000 0.00000 0.00000 0.00000 0.00000 0.00000
  -8   7   7   30.98    2.41   2 0.00000 0.00000 0.00000 0.00000 0.00000 0.00000
  -9   7   8  100.19    3.32   2 0.00000 0.00000 0.00000 0.00000 0.00000 0.00000
 -10   7   9    4.68    1.80   2 0.00000 0.00000 0.00000 0.00000 0.00000 0.00000
 -11   7  10   27.05    6.14  -1 0.00000 0.00000 0.00000 0.00000 0.00000 0.00000
  -1  -7  14   27.05    6.14   2 0.00000 0.00000 0.00000 0.00000 0.00000 0.00000
 -12   7  11  344.78    6.83  -1 0.00000 0.00000 0.00000 0.00000 0.00000 0.00000
  -1  -7  15  344.78    6.83   2 0.00000 0.00000 0.00000 0.00000 0.00000 0.00000
   9   6  -9  237.22    6.27  -1 0.00000 0.00000 0.00000 0.00000 0.00000 0.00000
  -1   6  11  237.22    6.27   2 0.00000 0.00000 0.00000 0.00000 0.00000 0.00000
   8   6  -8  162.05    3.18   2 0.00000 0.00000 0.00000 0.00000 0.00000 0.00000
   7   6  -7   37.56    1.93   2 0.00000 0.00000 0.00000 0.00000 0.00000 0.00000
   6   6  -6   79.13    2.20   2 0.00000 0.00000 0.00000 0.00000 0.00000 0.00000
   5   6  -5  131.87    1.76   2 0.00000 0.00000 0.00000 0.00000 0.00000 0.00000
   4   6  -4   74.05    1.36   2 0.00000 0.00000 0.00000 0.00000 0.00000 0.00000
   3   6  -3  539.10    6.79  -1 0.00000 0.00000 0.00000 0.00000 0.00000 0.00000
   0   6   3  539.10    6.79   2 0.00000 0.00000 0.00000 0.00000 0.00000 0.00000
   2   6  -2  243.34    3.61  -1 0.00000 0.00000 0.00000 0.00000 0.00000 0.00000
   0   6   2  243.34    3.61   2 0.00000 0.00000 0.00000 0.00000 0.00000 0.00000
   1   6  -1  134.63    5.51  -1 0.00000 0.00000 0.00000 0.00000 0.00000 0.00000
   0   6   1  134.63    5.51   2 0.00000 0.00000 0.00000 0.00000 0.00000 0.00000
   1   6  -1  126.61    2.41   2 0.00000 0.00000 0.00000 0.00000 0.00000 0.00000
   0   6   0  627.03    7.85   2 0.00000 0.00000 0.00000 0.00000 0.00000 0.00000
  -1   6   1   77.13    1.45   2 0.00000 0.00000 0.00000 0.00000 0.00000 0.00000
  -2   6   2   69.79    1.67   2 0.00000 0.00000 0.00000 0.00000 0.00000 0.00000
  -3   6   3  408.34    4.52   2 0.00000 0.00000 0.00000 0.00000 0.00000 0.00000
  -4   6   4  315.11    4.08   2 0.00000 0.00000 0.00000 0.00000 0.00000 0.00000
  -5   6   5  449.49    3.96  -1 0.00000 0.00000 0.00000 0.00000 0.00000 0.00000
  -1  -6   7  449.49    3.96   2 0.00000 0.00000 0.00000 0.00000 0.00000 0.00000
  -6   6   6  194.31    2.55  -1 0.00000 0.00000 0.00000 0.00000 0.00000 0.00000
  -1  -6   8  194.31    2.55   2 0.00000 0.00000 0.00000 0.00000 0.00000 0.00000
  -7   6   7  255.36    3.39  -1 0.00000 0.00000 0.00000 0.00000 0.00000 0.00000
  -1  -6   9  255.36    3.39   2 0.00000 0.00000 0.00000 0.00000 0.00000 0.00000
  -8   6   8  152.45    3.66   2 0.00000 0.00000 0.00000 0.00000 0.00000 0.00000
  -9   6   9   69.56    3.04   2 0.00000 0.00000 0.00000 0.00000 0.00000 0.00000
 -10   6  10    5.42    1.86   2 0.00000 0.00000 0.00000 0.00000 0.00000 0.00000
 -11   6  11   12.27    2.29   2 0.00000 0.00000 0.00000 0.00000 0.00000 0.00000
 -12   6  12  207.86    7.66   2 0.00000 0.00000 0.00000 0.00000 0.00000 0.00000
  10   5  -9   26.25    4.16   2 0.00000 0.00000 0.00000 0.00000 0.00000 0.00000
  10   5  -9   30.48    9.00  -1 0.00000 0.00000 0.00000 0.00000 0.00000 0.00000
   0   5  11   30.48    9.00   2 0.00000 0.00000 0.00000 0.00000 0.00000 0.00000
   9   5  -8  167.03    5.03  -1 0.00000 0.00000 0.00000 0.00000 0.00000 0.00000
   0   5  10  167.03    5.03   2 0.00000 0.00000 0.00000 0.00000 0.00000 0.00000
   8   5  -7  482.82    7.83  -1 0.00000 0.00000 0.00000 0.00000 0.00000 0.00000
   0   5   9  482.82    7.83   2 0.00000 0.00000 0.00000 0.00000 0.00000 0.00000
   7   5  -6    0.33    0.86   2 0.00000 0.00000 0.00000 0.00000 0.00000 0.00000
   7   5  -6   50.27    6.81  -1 0.00000 0.00000 0.00000 0.00000 0.00000 0.00000
   0   5   8   50.27    6.81   2 0.00000 0.00000 0.00000 0.00000 0.00000 0.00000
   6   5  -5   83.70    4.10   2 0.00000 0.00000 0.00000 0.00000 0.00000 0.00000
   5   5  -4  617.27    7.54   2 0.00000 0.00000 0.00000 0.00000 0.00000 0.00000
   4   5  -3   87.77    2.60   2 0.00000 0.00000 0.00000 0.00000 0.00000 0.00000
   3   5  -2   28.99    1.80   2 0.00000 0.00000 0.00000 0.00000 0.00000 0.00000
   2   5  -1  911.39   15.24  -1 0.00000 0.00000 0.00000 0.00000 0.00000 0.00000
   1   5   1  911.39   15.24   2 0.00000 0.00000 0.00000 0.00000 0.00000 0.00000
   1   5   0  148.50    4.69  -1 0.00000 0.00000 0.00000 0.00000 0.00000 0.00000
   1   5   0  148.50    4.69   2 0.00000 0.00000 0.00000 0.00000 0.00000 0.00000
   0   5   1  993.07   11.80  -1 0.00000 0.00000 0.00000 0.00000 0.00000 0.00000
   1   5  -1  993.07   11.80   2 0.00000 0.00000 0.00000 0.00000 0.00000 0.00000
  -1   5   2  380.25    3.81   2 0.00000 0.00000 0.00000 0.00000 0.00000 0.00000
  -2   5   3  127.03    2.17   2 0.00000 0.00000 0.00000 0.00000 0.00000 0.00000
  -3   5   4  245.96    3.34   2 0.00000 0.00000 0.00000 0.00000 0.00000 0.00000
  -4   5   5  630.41    6.58   2 0.00000 0.00000 0.00000 0.00000 0.00000 0.00000
  -5   5   6    1.25    1.10   2 0.00000 0.00000 0.00000 0.00000 0.00000 0.00000
  -6   5   7  604.93    6.04  -1 0.00000 0.00000 0.00000 0.00000 0.00000 0.00000
  -2  -5   9  604.93    6.04   2 0.00000 0.00000 0.00000 0.00000 0.00000 0.00000
  -7   5   8  240.31    3.61  -1 0.00000 0.00000 0.00000 0.00000 0.00000 0.00000
  -2  -5  10  240.31    3.61   2 0.00000 0.00000 0.00000 0.00000 0.00000 0.00000
  -8   5   9   87.20    3.70  -1 0.00000 0.00000 0.00000 0.00000 0.00000 0.00000
  -2  -5  11   87.20    3.70   2 0.00000 0.00000 0.00000 0.00000 0.00000 0.00000
  -9   5  10    6.95    1.79   2 0.00000 0.00000 0.00000 0.00000 0.00000 0.00000
 -10   5  11   32.24    3.34   2 0.00000 0.00000 0.00000 0.00000 0.00000 0.00000
 -11   5  12    1.62    2.46   2 0.00000 0.00000 0.00000 0.00000 0.00000 0.00000
  11   4  -9   11.04    3.01   2 0.00000 0.00000 0.00000 0.00000 0.00000 0.00000
  10   4  -8   81.41    5.01   2 0.00000 0.00000 0.00000 0.00000 0.00000 0.00000
   9   4  -7   15.43    2.74   2 0.00000 0.00000 0.00000 0.00000 0.00000 0.00000
   8   4  -6  173.45    4.91  -1 0.00000 0.00000 0.00000 0.00000 0.00000 0.00000
   1   4   8  173.45    4.91   2 0.00000 0.00000 0.00000 0.00000 0.00000 0.00000
   7   4  -5  373.60    6.16  -1 0.00000 0.00000 0.00000 0.00000 0.00000 0.00000
   1   4   7  373.60    6.16   2 0.00000 0.00000 0.00000 0.00000 0.00000 0.00000
   6   4  -4  521.09    7.54  -1 0.00000 0.00000 0.00000 0.00000 0.00000 0.00000
   1   4   6  521.09    7.54   2 0.00000 0.00000 0.00000 0.00000 0.00000 0.00000
   5   4  -3  363.34    5.18   2 0.00000 0.00000 0.00000 0.00000 0.00000 0.00000
   4   4  -2   50.59    2.12   2 0.00000 0.00000 0.00000 0.00000 0.00000 0.00000
   3   4  -1    1.26    0.79   2 0.00000 0.00000 0.00000 0.00000 0.00000 0.00000
   2   4   0  505.74    9.18   2 0.00000 0.00000 0.00000 0.00000 0.00000 0.00000
   1   4   1  230.42    5.58   2 0.00000 0.00000 0.00000 0.00000 0.00000 0.00000
   0   4   2   33.87    1.35  -1 0.00000 0.00000 0.00000 0.00000 0.00000 0.00000
   2   4  -2   33.87    1.35   2 0.00000 0.00000 0.00000 0.00000 0.00000 0.00000
  -1   4   3  409.53    3.54  -1 0.00000 0.00000 0.00000 0.00000 0.00000 0.00000
   2   4  -3  409.53    3.54   2 0.00000 0.00000 0.00000 0.00000 0.00000 0.00000
  -3   4   5  535.21    4.85   2 0.00000 0.00000 0.00000 0.00000 0.00000 0.00000
  -4   4   6  254.18    3.11   2 0.00000 0.00000 0.00000 0.00000 0.00000 0.00000
  -5   4   7  137.49    2.12   2 0.00000 0.00000 0.00000 0.00000 0.00000 0.00000
  -6   4   8  251.92    3.00   2 0.00000 0.00000 0.00000 0.00000 0.00000 0.00000
  -8   4  10   16.14    2.90  -1 0.00000 0.00000 0.00000 0.00000 0.00000 0.00000
  -3  -4  12   16.14    2.90   2 0.00000 0.00000 0.00000 0.00000 0.00000 0.00000
  -9   4  11   61.18    3.60  -1 0.00000 0.00000 0.00000 0.00000 0.00000 0.00000
  -3  -4  13   61.18    3.60   2 0.00000 0.00000 0.00000 0.00000 0.00000 0.00000
 -10   4  12  492.64   11.44  -1 0.00000 0.00000 0.00000 0.00000 0.00000 0.00000
  -3  -4  14  492.64   11.44   2 0.00000 0.00000 0.00000 0.00000 0.00000 0.00000
 -11   4  13   -1.98    2.37   2 0.00000 0.00000 0.00000 0.00000 0.00000 0.00000
  11   3  -8   22.59    4.03   2 0.00000 0.00000 0.00000 0.00000 0.00000 0.00000
  10   3  -7  239.65    7.28   2 0.00000 0.00000 0.00000 0.00000 0.00000 0.00000
   9   3  -6   40.45    3.84   2 0.00000 0.00000 0.00000 0.00000 0.00000 0.00000
   8   3  -5    3.75    1.93   2 0.00000 0.00000 0.00000 0.00000 0.00000 0.00000
   7   3  -4  718.58    8.62  -1 0.00000 0.00000 0.00000 0.00000 0.00000 0.00000
   2   3   6  718.58    8.62   2 0.00000 0.00000 0.00000 0.00000 0.00000 0.00000
   6   3  -3  252.82    3.34  -1 0.00000 0.00000 0.00000 0.00000 0.00000 0.00000
   2   3   5  252.82    3.34   2 0.00000 0.00000 0.00000 0.00000 0.00000 0.00000
   5   3  -2  523.64    6.35  -1 0.00000 0.00000 0.00000 0.00000 0.00000 0.00000
   2   3   4  523.64    6.35   2 0.00000 0.00000 0.00000 0.00000 0.00000 0.00000
   4   3  -1  126.20    2.78   2 0.00000 0.00000 0.00000 0.00000 0.00000 0.00000
   3   3   0    6.44    0.72   2 0.00000 0.00000 0.00000 0.00000 0.00000 0.00000
   2   3   1  740.94    7.55   2 0.00000 0.00000 0.00000 0.00000 0.00000 0.00000
   1   3   2   29.11    1.11   2 0.00000 0.00000 0.00000 0.00000 0.00000 0.00000
   0   3   3  126.39    1.68   2 0.00000 0.00000 0.00000 0.00000 0.00000 0.00000
  -1   3   4  669.59    6.76  -1 0.00000 0.00000 0.00000 0.00000 0.00000 0.00000
   3   3  -4  669.59    6.76   2 0.00000 0.00000 0.00000 0.00000 0.00000 0.00000
  -2   3   5   23.01    2.16  -1 0.00000 0.00000 0.00000 0.00000 0.00000 0.00000
   3   3  -5   23.01    2.16   2 0.00000 0.00000 0.00000 0.00000 0.00000 0.00000
  -3   3   6  338.66    4.51  -1 0.00000 0.00000 0.00000 0.00000 0.00000 0.00000
  -3  -3   6  338.66    4.51   2 0.00000 0.00000 0.00000 0.00000 0.00000 0.00000
  -4   3   7   68.75    1.93   2 0.00000 0.00000 0.00000 0.00000 0.00000 0.00000
  -5   3   8  312.04    3.83   2 0.00000 0.00000 0.00000 0.00000 0.00000 0.00000
  -6   3   9  126.42    3.47   2 0.00000 0.00000 0.00000 0.00000 0.00000 0.00000
  -7   3  10  131.64    3.81   2 0.00000 0.00000 0.00000 0.00000 0.00000 0.00000
  -8   3  11    5.33    2.01   2 0.00000 0.00000 0.00000 0.00000 0.00000 0.00000
  -9   3  12  155.77    4.95  -1 0.00000 0.00000 0.00000 0.00000 0.00000 0.00000
  -4  -3  14  155.77    4.95   2 0.00000 0.00000 0.00000 0.00000 0.00000 0.00000
 -10   3  13  381.46    6.85  -1 0.00000 0.00000 0.00000 0.00000 0.00000 0.00000
  -4  -3  15  381.46    6.85   2 0.00000 0.00000 0.00000 0.00000 0.00000 0.00000
 -11   3  14   18.52    4.63  -1 0.00000 0.00000 0.00000 0.00000 0.00000 0.00000
  -4  -3  16   18.52    4.63   2 0.00000 0.00000 0.00000 0.00000 0.00000 0.00000
  10   2  -6  180.37    6.25   2 0.00000 0.00000 0.00000 0.00000 0.00000 0.00000
   9   2  -5   49.40    3.90   2 0.00000 0.00000 0.00000 0.00000 0.00000 0.00000
   8   2  -4   20.47    3.24   2 0.00000 0.00000 0.00000 0.00000 0.00000 0.00000
   7   2  -3  122.00    4.55   2 0.00000 0.00000 0.00000 0.00000 0.00000 0.00000
   6   2  -2   67.85    3.45   2 0.00000 0.00000 0.00000 0.00000 0.00000 0.00000
   6   2  -2  125.03    6.35  -1 0.00000 0.00000 0.00000 0.00000 0.00000 0.00000
   3   2   4  125.03    6.35   2 0.00000 0.00000 0.00000 0.00000 0.00000 0.00000
   5   2  -1  194.76    3.53  -1 0.00000 0.00000 0.00000 0.00000 0.00000 0.00000
   3   2   3  194.76    3.53   2 0.00000 0.00000 0.00000 0.00000 0.00000 0.00000
   4   2   0  830.06    8.75  -1 0.00000 0.00000 0.00000 0.00000 0.00000 0.00000
   3   2   2  830.06    8.75   2 0.00000 0.00000 0.00000 0.00000 0.00000 0.00000
   3   2   1   17.61    3.49  -1 0.00000 0.00000 0.00000 0.00000 0.00000 0.00000
   3   2   1   17.61    3.49   2 0.00000 0.00000 0.00000 0.00000 0.00000 0.00000
   2   2   2  353.56    4.29   2 0.00000 0.00000 0.00000 0.00000 0.00000 0.00000
   1   2   3  505.69    4.46   2 0.00000 0.00000 0.00000 0.00000 0.00000 0.00000
   0   2   4  349.31    3.38   2 0.00000 0.00000 0.00000 0.00000 0.00000 0.00000
  -1   2   5  320.00    3.28   2 0.00000 0.00000 0.00000 0.00000 0.00000 0.00000
  -2   2   6   89.92    3.81  -1 0.00000 0.00000 0.00000 0.00000 0.00000 0.00000
  -4  -2   6   89.92    3.81   2 0.00000 0.00000 0.00000 0.00000 0.00000 0.00000
  -3   2   7  103.77    2.70  -1 0.00000 0.00000 0.00000 0.00000 0.00000 0.00000
  -4  -2   7  103.77    2.70   2 0.00000 0.00000 0.00000 0.00000 0.00000 0.00000
  -4   2   8 1470.57   13.86  -1 0.00000 0.00000 0.00000 0.00000 0.00000 0.00000
  -4  -2   8 1470.57   13.86   2 0.00000 0.00000 0.00000 0.00000 0.00000 0.00000
  -5   2   9  557.62    5.59   2 0.00000 0.00000 0.00000 0.00000 0.00000 0.00000
  -6   2  10   12.18    1.83   2 0.00000 0.00000 0.00000 0.00000 0.00000 0.00000
  -7   2  11    4.63    1.91   2 0.00000 0.00000 0.00000 0.00000 0.00000 0.00000
  -8   2  12   34.19    3.12   2 0.00000 0.00000 0.00000 0.00000 0.00000 0.00000
  -9   2  13   23.40    4.16   2 0.00000 0.00000 0.00000 0.00000 0.00000 0.00000
 -10   2  14  192.18    5.91  -1 0.00000 0.00000 0.00000 0.00000 0.00000 0.00000
  -5  -2  16  192.18    5.91   2 0.00000 0.00000 0.00000 0.00000 0.00000 0.00000
  10   1  -5  161.52    6.02  -1 0.00000 0.00000 0.00000 0.00000 0.00000 0.00000
   3   1   9  161.52    6.02   2 0.00000 0.00000 0.00000 0.00000 0.00000 0.00000
   9   1  -4  415.30    9.00   2 0.00000 0.00000 0.00000 0.00000 0.00000 0.00000
   8   1  -3  121.70    4.76   2 0.00000 0.00000 0.00000 0.00000 0.00000 0.00000
   7   1  -2  173.35    3.57   2 0.00000 0.00000 0.00000 0.00000 0.00000 0.00000
   6   1  -1   10.96    1.20   2 0.00000 0.00000 0.00000 0.00000 0.00000 0.00000
   5   1   0   20.11    1.38   2 0.00000 0.00000 0.00000 0.00000 0.00000 0.00000
   4   1   1 2833.21   25.64  -1 0.00000 0.00000 0.00000 0.00000 0.00000 0.00000
   4   1   1 2833.21   25.64   2 0.00000 0.00000 0.00000 0.00000 0.00000 0.00000
   3   1   2   21.53    1.43  -1 0.00000 0.00000 0.00000 0.00000 0.00000 0.00000
   4   1   0   21.53    1.43   2 0.00000 0.00000 0.00000 0.00000 0.00000 0.00000
   2   1   3  111.57    4.26  -1 0.00000 0.00000 0.00000 0.00000 0.00000 0.00000
   4   1  -1  111.57    4.26   2 0.00000 0.00000 0.00000 0.00000 0.00000 0.00000
   1   1   4  279.05    3.07   2 0.00000 0.00000 0.00000 0.00000 0.00000 0.00000
   0   1   5  204.63    2.60   2 0.00000 0.00000 0.00000 0.00000 0.00000 0.00000
  -1   1   6  685.89    5.92   2 0.00000 0.00000 0.00000 0.00000 0.00000 0.00000
  -2   1   7  325.21    3.05   2 0.00000 0.00000 0.00000 0.00000 0.00000 0.00000
  -3   1   8  804.12    6.01   2 0.00000 0.00000 0.00000 0.00000 0.00000 0.00000
  -4   1   9 1056.08   10.94  -1 0.00000 0.00000 0.00000 0.00000 0.00000 0.00000
  -5  -1   9 1056.08   10.94   2 0.00000 0.00000 0.00000 0.00000 0.00000 0.00000
  -5   1  10  290.83    5.01  -1 0.00000 0.00000 0.00000 0.00000 0.00000 0.00000
  -5  -1  10  290.83    5.01   2 0.00000 0.00000 0.00000 0.00000 0.00000 0.00000
  -6   1  11   -4.45    3.38  -1 0.00000 0.00000 0.00000 0.00000 0.00000 0.00000
  -5  -1  11   -4.45    3.38   2 0.00000 0.00000 0.00000 0.00000 0.00000 0.00000
  -7   1  12   32.69    4.36   2 0.00000 0.00000 0.00000 0.00000 0.00000 0.00000
  -8   1  13  265.49    8.10   2 0.00000 0.00000 0.00000 0.00000 0.00000 0.00000
  -9   1  14    4.23    3.69   2 0.00000 0.00000 0.00000 0.00000 0.00000 0.00000
 -10   1  15   26.49    4.76   2 0.00000 0.00000 0.00000 0.00000 0.00000 0.00000
  12   0  -6   40.17    4.38   2 0.00000 0.00000 0.00000 0.00000 0.00000 0.00000
  11   0  -5   22.66    4.91  -1 0.00000 0.00000 0.00000 0.00000 0.00000 0.00000
   4   0   9   22.66    4.91   2 0.00000 0.00000 0.00000 0.00000 0.00000 0.00000
  10   0  -4  169.78    5.55  -1 0.00000 0.00000 0.00000 0.00000 0.00000 0.00000
   4   0   8  169.78    5.55   2 0.00000 0.00000 0.00000 0.00000 0.00000 0.00000
   9   0  -3  812.49   12.89  -1 0.00000 0.00000 0.00000 0.00000 0.00000 0.00000
   4   0   7  812.49   12.89   2 0.00000 0.00000 0.00000 0.00000 0.00000 0.00000
   8   0  -2  101.27    3.04   2 0.00000 0.00000 0.00000 0.00000 0.00000 0.00000
   7   0  -1  252.25    4.20   2 0.00000 0.00000 0.00000 0.00000 0.00000 0.00000
   6   0   0  183.46    3.37   2 0.00000 0.00000 0.00000 0.00000 0.00000 0.00000
   5   0   1   40.68    2.54   2 0.00000 0.00000 0.00000 0.00000 0.00000 0.00000
   4   0   2  951.20    9.86   2 0.00000 0.00000 0.00000 0.00000 0.00000 0.00000
   3   0   3   75.67    2.79   2 0.00000 0.00000 0.00000 0.00000 0.00000 0.00000
   2   0   4  219.38    1.76  -1 0.00000 0.00000 0.00000 0.00000 0.00000 0.00000
   5   0  -2  219.38    1.76   2 0.00000 0.00000 0.00000 0.00000 0.00000 0.00000
   1   0   5 1286.99    9.33  -1 0.00000 0.00000 0.00000 0.00000 0.00000 0.00000
   5   0  -3 1286.99    9.33   2 0.00000 0.00000 0.00000 0.00000 0.00000 0.00000
   0   0   6  102.58    2.05   2 0.00000 0.00000 0.00000 0.00000 0.00000 0.00000
  -1   0   7  129.67    1.94   2 0.00000 0.00000 0.00000 0.00000 0.00000 0.00000
  -2   0   8   76.29    1.74   2 0.00000 0.00000 0.00000 0.00000 0.00000 0.00000
  -3   0   9  672.62    6.17   2 0.00000 0.00000 0.00000 0.00000 0.00000 0.00000
  -4   0  10  131.49    2.80   2 0.00000 0.00000 0.00000 0.00000 0.00000 0.00000
  -5   0  11  328.57    5.90  -1 0.00000 0.00000 0.00000 0.00000 0.00000 0.00000
  -6   0  11  328.57    5.90   2 0.00000 0.00000 0.00000 0.00000 0.00000 0.00000
  -6   0  12  156.56    4.19  -1 0.00000 0.00000 0.00000 0.00000 0.00000 0.00000
  -6   0  12  156.56    4.19   2 0.00000 0.00000 0.00000 0.00000 0.00000 0.00000
  -7   0  13   68.26    4.28  -1 0.00000 0.00000 0.00000 0.00000 0.00000 0.00000
  -6   0  13   68.26    4.28   2 0.00000 0.00000 0.00000 0.00000 0.00000 0.00000
  -8   0  14  125.88    6.39   2 0.00000 0.00000 0.00000 0.00000 0.00000 0.00000
  -9   0  15   10.36    4.12   2 0.00000 0.00000 0.00000 0.00000 0.00000 0.00000
  13  -1  -6   75.68    5.23   2 0.00000 0.00000 0.00000 0.00000 0.00000 0.00000
  12  -1  -5   40.02    4.21   2 0.00000 0.00000 0.00000 0.00000 0.00000 0.00000
  11  -1  -4   89.29    4.84   2 0.00000 0.00000 0.00000 0.00000 0.00000 0.00000
  10  -1  -3    6.79    1.58   2 0.00000 0.00000 0.00000 0.00000 0.00000 0.00000
  10  -1  -3   29.83    4.90  -1 0.00000 0.00000 0.00000 0.00000 0.00000 0.00000
   5  -1   7   29.83    4.90   2 0.00000 0.00000 0.00000 0.00000 0.00000 0.00000
   9  -1  -2  955.71   14.64  -1 0.00000 0.00000 0.00000 0.00000 0.00000 0.00000
   5  -1   6  955.71   14.64   2 0.00000 0.00000 0.00000 0.00000 0.00000 0.00000
   8  -1  -1   44.10    3.67  -1 0.00000 0.00000 0.00000 0.00000 0.00000 0.00000
   5  -1   5   44.10    3.67   2 0.00000 0.00000 0.00000 0.00000 0.00000 0.00000
   7  -1   0    1.20    1.06   2 0.00000 0.00000 0.00000 0.00000 0.00000 0.00000
   6  -1   1  411.82    5.34   2 0.00000 0.00000 0.00000 0.00000 0.00000 0.00000
   5  -1   2   51.61    2.90   2 0.00000 0.00000 0.00000 0.00000 0.00000 0.00000
   4  -1   3  257.00    5.27   2 0.00000 0.00000 0.00000 0.00000 0.00000 0.00000
   3  -1   4  626.53    9.28   2 0.00000 0.00000 0.00000 0.00000 0.00000 0.00000
   2  -1   5  248.85    3.70   2 0.00000 0.00000 0.00000 0.00000 0.00000 0.00000
   2  -1   5  458.52    6.94  -1 0.00000 0.00000 0.00000 0.00000 0.00000 0.00000
   6  -1  -3  458.52    6.94   2 0.00000 0.00000 0.00000 0.00000 0.00000 0.00000
   1  -1   6  976.72    7.58  -1 0.00000 0.00000 0.00000 0.00000 0.00000 0.00000
   6  -1  -4  976.72    7.58   2 0.00000 0.00000 0.00000 0.00000 0.00000 0.00000
   0  -1   7  278.33    3.90  -1 0.00000 0.00000 0.00000 0.00000 0.00000 0.00000
   6  -1  -5  278.33    3.90   2 0.00000 0.00000 0.00000 0.00000 0.00000 0.00000
  -1  -1   8   26.88    1.34   2 0.00000 0.00000 0.00000 0.00000 0.00000 0.00000
  -2  -1   9   74.26    2.12   2 0.00000 0.00000 0.00000 0.00000 0.00000 0.00000
  -3  -1  10  143.48    3.58   2 0.00000 0.00000 0.00000 0.00000 0.00000 0.00000
  -4  -1  11   44.72    2.85   2 0.00000 0.00000 0.00000 0.00000 0.00000 0.00000
  -5  -1  12   22.86    2.76   2 0.00000 0.00000 0.00000 0.00000 0.00000 0.00000
  -6  -1  13  513.79   11.93  -1 0.00000 0.00000 0.00000 0.00000 0.00000 0.00000
  -7   1  13  513.79   11.93   2 0.00000 0.00000 0.00000 0.00000 0.00000 0.00000
  -7  -1  14   32.49    3.49  -1 0.00000 0.00000 0.00000 0.00000 0.00000 0.00000
  -7   1  14   32.49    3.49   2 0.00000 0.00000 0.00000 0.00000 0.00000 0.00000
  -8  -1  15   86.73    4.53  -1 0.00000 0.00000 0.00000 0.00000 0.00000 0.00000
  -7   1  15   86.73    4.53   2 0.00000 0.00000 0.00000 0.00000 0.00000 0.00000
  13  -2  -5   24.06    4.16   2 0.00000 0.00000 0.00000 0.00000 0.00000 0.00000
  12  -2  -4   44.19    4.21   2 0.00000 0.00000 0.00000 0.00000 0.00000 0.00000
  11  -2  -3  172.62    4.30   2 0.00000 0.00000 0.00000 0.00000 0.00000 0.00000
  10  -2  -2   13.58    1.75   2 0.00000 0.00000 0.00000 0.00000 0.00000 0.00000
   9  -2  -1   94.11    3.06   2 0.00000 0.00000 0.00000 0.00000 0.00000 0.00000
   8  -2   0   29.77    4.21  -1 0.00000 0.00000 0.00000 0.00000 0.00000 0.00000
   6  -2   4   29.77    4.21   2 0.00000 0.00000 0.00000 0.00000 0.00000 0.00000
   7  -2   1   33.65    3.06  -1 0.00000 0.00000 0.00000 0.00000 0.00000 0.00000
   6  -2   3   33.65    3.06   2 0.00000 0.00000 0.00000 0.00000 0.00000 0.00000
   6  -2   2 2320.88   29.05  -1 0.00000 0.00000 0.00000 0.00000 0.00000 0.00000
   6  -2   2 2320.88   29.05   2 0.00000 0.00000 0.00000 0.00000 0.00000 0.00000
   5  -2   3   10.33    1.71   2 0.00000 0.00000 0.00000 0.00000 0.00000 0.00000
   4  -2   4    6.24    1.48   2 0.00000 0.00000 0.00000 0.00000 0.00000 0.00000
   3  -2   5  148.87    4.00   2 0.00000 0.00000 0.00000 0.00000 0.00000 0.00000
   2  -2   6  133.39    1.97   2 0.00000 0.00000 0.00000 0.00000 0.00000 0.00000
   1  -2   7  160.67    2.34   2 0.00000 0.00000 0.00000 0.00000 0.00000 0.00000
   0  -2   8  185.87    3.66  -1 0.00000 0.00000 0.00000 0.00000 0.00000 0.00000
  -7   2   6  185.87    3.66   2 0.00000 0.00000 0.00000 0.00000 0.00000 0.00000
  -1  -2   9  572.15    6.58  -1 0.00000 0.00000 0.00000 0.00000 0.00000 0.00000
  -7   2   7  572.15    6.58   2 0.00000 0.00000 0.00000 0.00000 0.00000 0.00000
  -2  -2  10  621.37    7.48  -1 0.00000 0.00000 0.00000 0.00000 0.00000 0.00000
  -7   2   8  621.37    7.48   2 0.00000 0.00000 0.00000 0.00000 0.00000 0.00000
  -3  -2  11  152.82    3.91   2 0.00000 0.00000 0.00000 0.00000 0.00000 0.00000
  -4  -2  12   31.79    2.89   2 0.00000 0.00000 0.00000 0.00000 0.00000 0.00000
  -5  -2  13    6.25    2.12   2 0.00000 0.00000 0.00000 0.00000 0.00000 0.00000
  -6  -2  14  213.93    5.16   2 0.00000 0.00000 0.00000 0.00000 0.00000 0.00000
  -7  -2  15    9.67    2.54   2 0.00000 0.00000 0.00000 0.00000 0.00000 0.00000
  13  -3  -4   20.07    4.69  -1 0.00000 0.00000 0.00000 0.00000 0.00000 0.00000
   6  -3  10   20.07    4.69   2 0.00000 0.00000 0.00000 0.00000 0.00000 0.00000
  12  -3  -3   11.16    2.63   2 0.00000 0.00000 0.00000 0.00000 0.00000 0.00000
  12  -3  -3   37.57    5.88  -1 0.00000 0.00000 0.00000 0.00000 0.00000 0.00000
   6  -3   9   37.57    5.88   2 0.00000 0.00000 0.00000 0.00000 0.00000 0.00000
  11  -3  -2  242.41    4.99   2 0.00000 0.00000 0.00000 0.00000 0.00000 0.00000
  10  -3  -1    0.17    1.31   2 0.00000 0.00000 0.00000 0.00000 0.00000 0.00000
   9  -3   0   20.47    2.17   2 0.00000 0.00000 0.00000 0.00000 0.00000 0.00000
   8  -3   1  107.88    4.45   2 0.00000 0.00000 0.00000 0.00000 0.00000 0.00000
   7  -3   2    1.09    1.62   2 0.00000 0.00000 0.00000 0.00000 0.00000 0.00000
   6  -3   3  651.27   10.68  -1 0.00000 0.00000 0.00000 0.00000 0.00000 0.00000
   7  -3   1  651.27   10.68   2 0.00000 0.00000 0.00000 0.00000 0.00000 0.00000
   5  -3   4   38.65    1.27  -1 0.00000 0.00000 0.00000 0.00000 0.00000 0.00000
   7  -3   0   38.65    1.27   2 0.00000 0.00000 0.00000 0.00000 0.00000 0.00000
   4  -3   5    0.87    0.65   2 0.00000 0.00000 0.00000 0.00000 0.00000 0.00000
   3  -3   6  402.73    3.32   2 0.00000 0.00000 0.00000 0.00000 0.00000 0.00000
   2  -3   7   93.26    1.95   2 0.00000 0.00000 0.00000 0.00000 0.00000 0.00000
   1  -3   8   13.59    1.50   2 0.00000 0.00000 0.00000 0.00000 0.00000 0.00000
   0  -3   9   44.40    2.46   2 0.00000 0.00000 0.00000 0.00000 0.00000 0.00000
  -1  -3  10  530.60    6.96  -1 0.00000 0.00000 0.00000 0.00000 0.00000 0.00000
  -8   3   8  530.60    6.96   2 0.00000 0.00000 0.00000 0.00000 0.00000 0.00000
  -2  -3  11  126.52    3.51  -1 0.00000 0.00000 0.00000 0.00000 0.00000 0.00000
  -8   3   9  126.52    3.51   2 0.00000 0.00000 0.00000 0.00000 0.00000 0.00000
  -3  -3  12  738.72    9.36  -1 0.00000 0.00000 0.00000 0.00000 0.00000 0.00000
  -8   3  10  738.72    9.36   2 0.00000 0.00000 0.00000 0.00000 0.00000 0.00000
  -4  -3  13   62.92    3.30   2 0.00000 0.00000 0.00000 0.00000 0.00000 0.00000
  -5  -3  14   38.55    3.23   2 0.00000 0.00000 0.00000 0.00000 0.00000 0.00000
  -6  -3  15   34.30    3.35   2 0.00000 0.00000 0.00000 0.00000 0.00000 0.00000
  -7  -3  16    1.77    2.47   2 0.00000 0.00000 0.00000 0.00000 0.00000 0.00000
  13  -4  -3   67.98    5.63  -1 0.00000 0.00000 0.00000 0.00000 0.00000 0.00000
   7  -4   9   67.98    5.63   2 0.00000 0.00000 0.00000 0.00000 0.00000 0.00000
  12  -4  -2   76.48    4.99  -1 0.00000 0.00000 0.00000 0.00000 0.00000 0.00000
   7  -4   8   76.48    4.99   2 0.00000 0.00000 0.00000 0.00000 0.00000 0.00000
  11  -4  -1  781.72   14.11  -1 0.00000 0.00000 0.00000 0.00000 0.00000 0.00000
   7  -4   7  781.72   14.11   2 0.00000 0.00000 0.00000 0.00000 0.00000 0.00000
  10  -4   0   82.27    3.13   2 0.00000 0.00000 0.00000 0.00000 0.00000 0.00000
   9  -4   1   28.04    3.47   2 0.00000 0.00000 0.00000 0.00000 0.00000 0.00000
   8  -4   2  388.49    8.25   2 0.00000 0.00000 0.00000 0.00000 0.00000 0.00000
   7  -4   3    9.46    2.05   2 0.00000 0.00000 0.00000 0.00000 0.00000 0.00000
   6  -4   4   27.21    3.11   2 0.00000 0.00000 0.00000 0.00000 0.00000 0.00000
   5  -4   5  518.11    4.33  -1 0.00000 0.00000 0.00000 0.00000 0.00000 0.00000
   8  -4  -1  518.11    4.33   2 0.00000 0.00000 0.00000 0.00000 0.00000 0.00000
   4  -4   6   66.19    1.75  -1 0.00000 0.00000 0.00000 0.00000 0.00000 0.00000
   8  -4  -2   66.19    1.75   2 0.00000 0.00000 0.00000 0.00000 0.00000 0.00000
   3  -4   7 1028.75   14.15  -1 0.00000 0.00000 0.00000 0.00000 0.00000 0.00000
   8  -4  -3 1028.75   14.15   2 0.00000 0.00000 0.00000 0.00000 0.00000 0.00000
   2  -4   8    8.92    1.11   2 0.00000 0.00000 0.00000 0.00000 0.00000 0.00000
   1  -4   9   31.11    1.85   2 0.00000 0.00000 0.00000 0.00000 0.00000 0.00000
   0  -4  10  273.51    4.85   2 0.00000 0.00000 0.00000 0.00000 0.00000 0.00000
  -1  -4  11  208.22    4.39   2 0.00000 0.00000 0.00000 0.00000 0.00000 0.00000
  -2  -4  12    3.68    5.45  -1 0.00000 0.00000 0.00000 0.00000 0.00000 0.00000
  -9   4  10    3.68    5.45   2 0.00000 0.00000 0.00000 0.00000 0.00000 0.00000
  -2  -4  12    0.36    1.73   2 0.00000 0.00000 0.00000 0.00000 0.00000 0.00000
  -3  -4  13   57.13    3.84  -1 0.00000 0.00000 0.00000 0.00000 0.00000 0.00000
  -9   4  11   57.13    3.84   2 0.00000 0.00000 0.00000 0.00000 0.00000 0.00000
  -4  -4  14  438.04   10.83  -1 0.00000 0.00000 0.00000 0.00000 0.00000 0.00000
  -9   4  12  438.04   10.83   2 0.00000 0.00000 0.00000 0.00000 0.00000 0.00000
  -5  -4  15  144.98    8.45  -1 0.00000 0.00000 0.00000 0.00000 0.00000 0.00000
  -9   4  13  144.98    8.45   2 0.00000 0.00000 0.00000 0.00000 0.00000 0.00000
  -5  -4  15   94.77    4.06   2 0.00000 0.00000 0.00000 0.00000 0.00000 0.00000
  -6  -4  16   47.07    3.69   2 0.00000 0.00000 0.00000 0.00000 0.00000 0.00000
  13  -5  -2  193.38    4.95   2 0.00000 0.00000 0.00000 0.00000 0.00000 0.00000
  12  -5  -1  127.87    6.72  -1 0.00000 0.00000 0.00000 0.00000 0.00000 0.00000
   8  -5   7  127.87    6.72   2 0.00000 0.00000 0.00000 0.00000 0.00000 0.00000
  11  -5   0  245.41    7.29  -1 0.00000 0.00000 0.00000 0.00000 0.00000 0.00000
   8  -5   6  245.41    7.29   2 0.00000 0.00000 0.00000 0.00000 0.00000 0.00000
  10  -5   1  114.52    5.86  -1 0.00000 0.00000 0.00000 0.00000 0.00000 0.00000
   8  -5   5  114.52    5.86   2 0.00000 0.00000 0.00000 0.00000 0.00000 0.00000
   9  -5   2    8.34    2.31   2 0.00000 0.00000 0.00000 0.00000 0.00000 0.00000
   8  -5   3  510.47    9.94   2 0.00000 0.00000 0.00000 0.00000 0.00000 0.00000
   7  -5   4  152.36    5.26   2 0.00000 0.00000 0.00000 0.00000 0.00000 0.00000
   6  -5   5  114.95    4.65   2 0.00000 0.00000 0.00000 0.00000 0.00000 0.00000
   5  -5   6  477.51    9.00   2 0.00000 0.00000 0.00000 0.00000 0.00000 0.00000
   4  -5   7  218.78    3.05  -1 0.00000 0.00000 0.00000 0.00000 0.00000 0.00000
   9  -5  -3  218.78    3.05   2 0.00000 0.00000 0.00000 0.00000 0.00000 0.00000
   3  -5   8  295.42    3.27  -1 0.00000 0.00000 0.00000 0.00000 0.00000 0.00000
   9  -5  -4  295.42    3.27   2 0.00000 0.00000 0.00000 0.00000 0.00000 0.00000
   2  -5   9  117.65    3.07  -1 0.00000 0.00000 0.00000 0.00000 0.00000 0.00000
  -9   5   5  117.65    3.07   2 0.00000 0.00000 0.00000 0.00000 0.00000 0.00000
   1  -5  10  283.84    3.92   2 0.00000 0.00000 0.00000 0.00000 0.00000 0.00000
   0  -5  11   85.80    2.60   2 0.00000 0.00000 0.00000 0.00000 0.00000 0.00000
  -1  -5  12   11.18    1.55   2 0.00000 0.00000 0.00000 0.00000 0.00000 0.00000
  -2  -5  13   31.83    2.34   2 0.00000 0.00000 0.00000 0.00000 0.00000 0.00000
  -3  -5  14   57.18    2.75   2 0.00000 0.00000 0.00000 0.00000 0.00000 0.00000
  -4  -5  15  291.52    9.92  -1 0.00000 0.00000 0.00000 0.00000 0.00000 0.00000
 -10   5  13  291.52    9.92   2 0.00000 0.00000 0.00000 0.00000 0.00000 0.00000
  -5  -5  16    5.03    5.14  -1 0.00000 0.00000 0.00000 0.00000 0.00000 0.00000
 -10   5  14    5.03    5.14   2 0.00000 0.00000 0.00000 0.00000 0.00000 0.00000
  13  -6  -1  157.57    6.61   2 0.00000 0.00000 0.00000 0.00000 0.00000 0.00000
  12  -6   0    1.59    2.54   2 0.00000 0.00000 0.00000 0.00000 0.00000 0.00000
  11  -6   1   44.96    5.51  -1 0.00000 0.00000 0.00000 0.00000 0.00000 0.00000
   9  -6   5   44.96    5.51   2 0.00000 0.00000 0.00000 0.00000 0.00000 0.00000
  10  -6   2  350.13    8.64  -1 0.00000 0.00000 0.00000 0.00000 0.00000 0.00000
   9  -6   4  350.13    8.64   2 0.00000 0.00000 0.00000 0.00000 0.00000 0.00000
   9  -6   3   15.72    4.05  -1 0.00000 0.00000 0.00000 0.00000 0.00000 0.00000
   9  -6   3   15.72    4.05   2 0.00000 0.00000 0.00000 0.00000 0.00000 0.00000
   8  -6   4  105.52    3.00   2 0.00000 0.00000 0.00000 0.00000 0.00000 0.00000
   7  -6   5   44.64    3.89   2 0.00000 0.00000 0.00000 0.00000 0.00000 0.00000
   6  -6   6   -1.48    1.92   2 0.00000 0.00000 0.00000 0.00000 0.00000 0.00000
   5  -6   7  511.37    9.81   2 0.00000 0.00000 0.00000 0.00000 0.00000 0.00000
   4  -6   8   67.11    4.17   2 0.00000 0.00000 0.00000 0.00000 0.00000 0.00000
   3  -6   9   34.53    3.44  -1 0.00000 0.00000 0.00000 0.00000 0.00000 0.00000
 -10   6   5   34.53    3.44   2 0.00000 0.00000 0.00000 0.00000 0.00000 0.00000
   2  -6  10  298.96    4.22  -1 0.00000 0.00000 0.00000 0.00000 0.00000 0.00000
 -10   6   6  298.96    4.22   2 0.00000 0.00000 0.00000 0.00000 0.00000 0.00000
   1  -6  11  514.67    7.09  -1 0.00000 0.00000 0.00000 0.00000 0.00000 0.00000
 -10   6   7  514.67    7.09   2 0.00000 0.00000 0.00000 0.00000 0.00000 0.00000
   0  -6  12    0.57    1.37   2 0.00000 0.00000 0.00000 0.00000 0.00000 0.00000
  -1  -6  13    4.84    1.56   2 0.00000 0.00000 0.00000 0.00000 0.00000 0.00000
  -2  -6  14  198.35    3.95   2 0.00000 0.00000 0.00000 0.00000 0.00000 0.00000
  -3  -6  15   82.22    3.16   2 0.00000 0.00000 0.00000 0.00000 0.00000 0.00000
  13  -7   0   43.22    4.66   2 0.00000 0.00000 0.00000 0.00000 0.00000 0.00000
  12  -7   1   32.00    4.26   2 0.00000 0.00000 0.00000 0.00000 0.00000 0.00000
  11  -7   2   19.24    3.15   2 0.00000 0.00000 0.00000 0.00000 0.00000 0.00000
  10  -7   3  333.20    8.59   2 0.00000 0.00000 0.00000 0.00000 0.00000 0.00000
   9  -7   4    1.63    2.42  -1 0.00000 0.00000 0.00000 0.00000 0.00000 0.00000
  10  -7   2    1.63    2.42   2 0.00000 0.00000 0.00000 0.00000 0.00000 0.00000
   8  -7   5   46.30    2.50  -1 0.00000 0.00000 0.00000 0.00000 0.00000 0.00000
  10  -7   1   46.30    2.50   2 0.00000 0.00000 0.00000 0.00000 0.00000 0.00000
   7  -7   6  217.90    4.60  -1 0.00000 0.00000 0.00000 0.00000 0.00000 0.00000
  10  -7   0  217.90    4.60   2 0.00000 0.00000 0.00000 0.00000 0.00000 0.00000
   6  -7   7   43.11    3.96   2 0.00000 0.00000 0.00000 0.00000 0.00000 0.00000
   5  -7   8   52.59    4.08   2 0.00000 0.00000 0.00000 0.00000 0.00000 0.00000
   4  -7   9    0.89    2.16   2 0.00000 0.00000 0.00000 0.00000 0.00000 0.00000
   3  -7  10   15.96    2.85   2 0.00000 0.00000 0.00000 0.00000 0.00000 0.00000
   2  -7  11  263.13    7.99  -1 0.00000 0.00000 0.00000 0.00000 0.00000 0.00000
 -11   7   7  263.13    7.99   2 0.00000 0.00000 0.00000 0.00000 0.00000 0.00000
   2  -7  11  178.82    4.35   2 0.00000 0.00000 0.00000 0.00000 0.00000 0.00000
   1  -7  12  184.69    4.77  -1 0.00000 0.00000 0.00000 0.00000 0.00000 0.00000
 -11   7   8  184.69    4.77   2 0.00000 0.00000 0.00000 0.00000 0.00000 0.00000
   0  -7  13   33.25    3.34  -1 0.00000 0.00000 0.00000 0.00000 0.00000 0.00000
 -11   7   9   33.25    3.34   2 0.00000 0.00000 0.00000 0.00000 0.00000 0.00000
  -1  -7  14   24.02    4.45  -1 0.00000 0.00000 0.00000 0.00000 0.00000 0.00000
 -11   7  10   24.02    4.45   2 0.00000 0.00000 0.00000 0.00000 0.00000 0.00000
  -2  -7  15   83.43    3.17   2 0.00000 0.00000 0.00000 0.00000 0.00000 0.00000
  12  -8   2   22.55    3.56   2 0.00000 0.00000 0.00000 0.00000 0.00000 0.00000
  11  -8   3    5.49    2.74   2 0.00000 0.00000 0.00000 0.00000 0.00000 0.00000
  10  -8   4  276.70    4.45   2 0.00000 0.00000 0.00000 0.00000 0.00000 0.00000
   9  -8   5   57.99    4.56   2 0.00000 0.00000 0.00000 0.00000 0.00000 0.00000
   8  -8   6  111.40    3.81  -1 0.00000 0.00000 0.00000 0.00000 0.00000 0.00000
  11  -8   0  111.40    3.81   2 0.00000 0.00000 0.00000 0.00000 0.00000 0.00000
   7  -8   7  529.42    7.03  -1 0.00000 0.00000 0.00000 0.00000 0.00000 0.00000
  11  -8  -1  529.42    7.03   2 0.00000 0.00000 0.00000 0.00000 0.00000 0.00000
   6  -8   8   72.35    3.52  -1 0.00000 0.00000 0.00000 0.00000 0.00000 0.00000
  11  -8  -2   72.35    3.52   2 0.00000 0.00000 0.00000 0.00000 0.00000 0.00000
   5  -8   9   29.43    3.93   2 0.00000 0.00000 0.00000 0.00000 0.00000 0.00000
   4  -8  10   14.30    2.89   2 0.00000 0.00000 0.00000 0.00000 0.00000 0.00000
   3  -8  11  100.42    5.22   2 0.00000 0.00000 0.00000 0.00000 0.00000 0.00000
   2  -8  12   42.58    3.14   2 0.00000 0.00000 0.00000 0.00000 0.00000 0.00000
   1  -8  13   33.12    3.15   2 0.00000 0.00000 0.00000 0.00000 0.00000 0.00000
   0  -8  14  142.54    5.23  -1 0.00000 0.00000 0.00000 0.00000 0.00000 0.00000
 -12   8  10  142.54    5.23   2 0.00000 0.00000 0.00000 0.00000 0.00000 0.00000
  -1  -8  15   20.87    3.53  -1 0.00000 0.00000 0.00000 0.00000 0.00000 0.00000
 -12   8  11   20.87    3.53   2 0.00000 0.00000 0.00000 0.00000 0.00000 0.00000
  11  -9   4    4.02    1.48   2 0.00000 0.00000 0.00000 0.00000 0.00000 0.00000
  10  -9   5   33.76    4.31   2 0.00000 0.00000 0.00000 0.00000 0.00000 0.00000
   9  -9   6   56.18    4.85   2 0.00000 0.00000 0.00000 0.00000 0.00000 0.00000
   8  -9   7   17.44    3.24   2 0.00000 0.00000 0.00000 0.00000 0.00000 0.00000
   7  -9   8  480.10   10.03  -1 0.00000 0.00000 0.00000 0.00000 0.00000 0.00000
  12  -9  -2  480.10   10.03   2 0.00000 0.00000 0.00000 0.00000 0.00000 0.00000
   6  -9   9  125.75    3.96  -1 0.00000 0.00000 0.00000 0.00000 0.00000 0.00000
  12  -9  -3  125.75    3.96   2 0.00000 0.00000 0.00000 0.00000 0.00000 0.00000
   5  -9  10   32.45    2.55  -1 0.00000 0.00000 0.00000 0.00000 0.00000 0.00000
 -12   9   4   32.45    2.55   2 0.00000 0.00000 0.00000 0.00000 0.00000 0.00000
   4  -9  11  209.63    7.18   2 0.00000 0.00000 0.00000 0.00000 0.00000 0.00000
   4  -9  11  254.82    5.86  -1 0.00000 0.00000 0.00000 0.00000 0.00000 0.00000
 -12   9   5  254.82    5.86   2 0.00000 0.00000 0.00000 0.00000 0.00000 0.00000
   3  -9  12   -2.43    2.72   2 0.00000 0.00000 0.00000 0.00000 0.00000 0.00000
   2  -9  13    3.25    3.16   2 0.00000 0.00000 0.00000 0.00000 0.00000 0.00000
   1  -9  14   21.71    3.98   2 0.00000 0.00000 0.00000 0.00000 0.00000 0.00000
  10 -10   6   -1.73    2.83   2 0.00000 0.00000 0.00000 0.00000 0.00000 0.00000
   9 -10   7  111.25    5.93   2 0.00000 0.00000 0.00000 0.00000 0.00000 0.00000
   8 -10   8    4.72    3.01   2 0.00000 0.00000 0.00000 0.00000 0.00000 0.00000
   7 -10   9   66.71    5.27   2 0.00000 0.00000 0.00000 0.00000 0.00000 0.00000
   6 -10  10   44.29    6.77  -1 0.00000 0.00000 0.00000 0.00000 0.00000 0.00000
 -13  10   4   44.29    6.77   2 0.00000 0.00000 0.00000 0.00000 0.00000 0.00000
   6 -10  10   30.72    4.56   2 0.00000 0.00000 0.00000 0.00000 0.00000 0.00000
   5 -10  11  195.63    5.26  -1 0.00000 0.00000 0.00000 0.00000 0.00000 0.00000
 -13  10   5  195.63    5.26   2 0.00000 0.00000 0.00000 0.00000 0.00000 0.00000
   4 -10  12  427.09    7.05  -1 0.00000 0.00000 0.00000 0.00000 0.00000 0.00000
 -13  10   6  427.09    7.05   2 0.00000 0.00000 0.00000 0.00000 0.00000 0.00000
  -4  15  -4   91.16    5.86  -1 0.00000 0.00000 0.00000 0.00000 0.00000 0.00000
  -6  15   0   91.16    5.86   2 0.00000 0.00000 0.00000 0.00000 0.00000 0.00000
  -5  15  -3   42.20    3.98   2 0.00000 0.00000 0.00000 0.00000 0.00000 0.00000
  -6  15  -2    5.55    2.45   2 0.00000 0.00000 0.00000 0.00000 0.00000 0.00000
  -7  15  -1   38.25    4.00   2 0.00000 0.00000 0.00000 0.00000 0.00000 0.00000
  -1  14  -6   10.99    2.38   2 0.00000 0.00000 0.00000 0.00000 0.00000 0.00000
  -2  14  -5  103.83    4.60   2 0.00000 0.00000 0.00000 0.00000 0.00000 0.00000
  -2  14  -5  109.56    5.82  -1 0.00000 0.00000 0.00000 0.00000 0.00000 0.00000
  -5  14   1  109.56    5.82   2 0.00000 0.00000 0.00000 0.00000 0.00000 0.00000
  -3  14  -4   23.30    4.34  -1 0.00000 0.00000 0.00000 0.00000 0.00000 0.00000
  -5  14   0   23.30    4.34   2 0.00000 0.00000 0.00000 0.00000 0.00000 0.00000
  -4  14  -3   59.61    4.02  -1 0.00000 0.00000 0.00000 0.00000 0.00000 0.00000
  -5  14  -1   59.61    4.02   2 0.00000 0.00000 0.00000 0.00000 0.00000 0.00000
  -5  14  -2  401.85    8.97  -1 0.00000 0.00000 0.00000 0.00000 0.00000 0.00000
  -5  14  -2  401.85    8.97   2 0.00000 0.00000 0.00000 0.00000 0.00000 0.00000
  -6  14  -1   29.51    3.61   2 0.00000 0.00000 0.00000 0.00000 0.00000 0.00000
  -7  14   0   -0.91    2.16   2 0.00000 0.00000 0.00000 0.00000 0.00000 0.00000
  -8  14   1   24.64    3.80   2 0.00000 0.00000 0.00000 0.00000 0.00000 0.00000
  -9  14   2   69.37    4.53   2 0.00000 0.00000 0.00000 0.00000 0.00000 0.00000
   1  13  -7   54.42    8.23  -1 0.00000 0.00000 0.00000 0.00000 0.00000 0.00000
  -5  13   5   54.42    8.23   2 0.00000 0.00000 0.00000 0.00000 0.00000 0.00000
   0  13  -6  179.50    5.32   2 0.00000 0.00000 0.00000 0.00000 0.00000 0.00000
  -1  13  -5   -0.06    1.93   2 0.00000 0.00000 0.00000 0.00000 0.00000 0.00000
  -2  13  -4   86.76    4.17   2 0.00000 0.00000 0.00000 0.00000 0.00000 0.00000
  -3  13  -3   54.34    3.68   2 0.00000 0.00000 0.00000 0.00000 0.00000 0.00000
  -4  13  -2   54.85    4.73  -1 0.00000 0.00000 0.00000 0.00000 0.00000 0.00000
  -4  13  -2   54.85    4.73   2 0.00000 0.00000 0.00000 0.00000 0.00000 0.00000
  -5  13  -1  185.38    5.77  -1 0.00000 0.00000 0.00000 0.00000 0.00000 0.00000
  -4  13  -3  185.38    5.77   2 0.00000 0.00000 0.00000 0.00000 0.00000 0.00000
  -6  13   0  150.83    5.67  -1 0.00000 0.00000 0.00000 0.00000 0.00000 0.00000
  -4  13  -4  150.83    5.67   2 0.00000 0.00000 0.00000 0.00000 0.00000 0.00000
  -7  13   1   54.45    5.29  -1 0.00000 0.00000 0.00000 0.00000 0.00000 0.00000
  -4  13  -5   54.45    5.29   2 0.00000 0.00000 0.00000 0.00000 0.00000 0.00000
  -8  13   2   55.51    4.11   2 0.00000 0.00000 0.00000 0.00000 0.00000 0.00000
  -9  13   3  210.27    6.45   2 0.00000 0.00000 0.00000 0.00000 0.00000 0.00000
 -10  13   4   10.03    2.87   2 0.00000 0.00000 0.00000 0.00000 0.00000 0.00000
   3  12  -8   72.13    3.66   2 0.00000 0.00000 0.00000 0.00000 0.00000 0.00000
   2  12  -7   39.92    6.45  -1 0.00000 0.00000 0.00000 0.00000 0.00000 0.00000
  -4  12   5   39.92    6.45   2 0.00000 0.00000 0.00000 0.00000 0.00000 0.00000
   1  12  -6  158.90    7.49  -1 0.00000 0.00000 0.00000 0.00000 0.00000 0.00000
  -4  12   4  158.90    7.49   2 0.00000 0.00000 0.00000 0.00000 0.00000 0.00000
   0  12  -5  433.97    7.83  -1 0.00000 0.00000 0.00000 0.00000 0.00000 0.00000
  -4  12   3  433.97    7.83   2 0.00000 0.00000 0.00000 0.00000 0.00000 0.00000
  -1  12  -4    7.69    1.96   2 0.00000 0.00000 0.00000 0.00000 0.00000 0.00000
  -2  12  -3    6.98    1.96   2 0.00000 0.00000 0.00000 0.00000 0.00000 0.00000
  -3  12  -2  233.01    5.68   2 0.00000 0.00000 0.00000 0.00000 0.00000 0.00000
  -4  12  -1   28.32    3.09   2 0.00000 0.00000 0.00000 0.00000 0.00000 0.00000
  -5  12   0   93.12    4.09   2 0.00000 0.00000 0.00000 0.00000 0.00000 0.00000
  -5  12   0  139.65    5.93  -1 0.00000 0.00000 0.00000 0.00000 0.00000 0.00000
  -3  12  -4  139.65    5.93   2 0.00000 0.00000 0.00000 0.00000 0.00000 0.00000
  -6  12   1  261.83    6.78  -1 0.00000 0.00000 0.00000 0.00000 0.00000 0.00000
  -3  12  -5  261.83    6.78   2 0.00000 0.00000 0.00000 0.00000 0.00000 0.00000
  -7  12   2   89.22    2.64  -1 0.00000 0.00000 0.00000 0.00000 0.00000 0.00000
  -3  12  -6   89.22    2.64   2 0.00000 0.00000 0.00000 0.00000 0.00000 0.00000
  -8  12   3  340.47    4.92  -1 0.00000 0.00000 0.00000 0.00000 0.00000 0.00000
  -3  12  -7  340.47    4.92   2 0.00000 0.00000 0.00000 0.00000 0.00000 0.00000
  -9  12   4  151.29    5.52   2 0.00000 0.00000 0.00000 0.00000 0.00000 0.00000
 -10  12   5    1.84    2.49   2 0.00000 0.00000 0.00000 0.00000 0.00000 0.00000
 -11  12   6   49.50    4.46   2 0.00000 0.00000 0.00000 0.00000 0.00000 0.00000
   4  11  -8   42.53    2.16   2 0.00000 0.00000 0.00000 0.00000 0.00000 0.00000
   3  11  -7   44.08    3.03   2 0.00000 0.00000 0.00000 0.00000 0.00000 0.00000
   2  11  -6  117.32    3.93   2 0.00000 0.00000 0.00000 0.00000 0.00000 0.00000
   1  11  -5   94.46    3.16  -1 0.00000 0.00000 0.00000 0.00000 0.00000 0.00000
  -3  11   3   94.46    3.16   2 0.00000 0.00000 0.00000 0.00000 0.00000 0.00000
   0  11  -4  303.29    5.71  -1 0.00000 0.00000 0.00000 0.00000 0.00000 0.00000
  -3  11   2  303.29    5.71   2 0.00000 0.00000 0.00000 0.00000 0.00000 0.00000
  -1  11  -3  343.26    6.75  -1 0.00000 0.00000 0.00000 0.00000 0.00000 0.00000
  -3  11   1  343.26    6.75   2 0.00000 0.00000 0.00000 0.00000 0.00000 0.00000
  -2  11  -2    1.14    1.55   2 0.00000 0.00000 0.00000 0.00000 0.00000 0.00000
  -3  11  -1  374.93    7.03   2 0.00000 0.00000 0.00000 0.00000 0.00000 0.00000
  -4  11   0  112.67    4.05   2 0.00000 0.00000 0.00000 0.00000 0.00000 0.00000
  -5  11   1    0.76    1.73   2 0.00000 0.00000 0.00000 0.00000 0.00000 0.00000
  -6  11   2   61.97    3.70   2 0.00000 0.00000 0.00000 0.00000 0.00000 0.00000
  -7  11   3   91.53    2.97  -1 0.00000 0.00000 0.00000 0.00000 0.00000 0.00000
  -2  11  -7   91.53    2.97   2 0.00000 0.00000 0.00000 0.00000 0.00000 0.00000
  -8  11   4  198.81    3.48  -1 0.00000 0.00000 0.00000 0.00000 0.00000 0.00000
  -2  11  -8  198.81    3.48   2 0.00000 0.00000 0.00000 0.00000 0.00000 0.00000
  -9  11   5  108.66    3.29  -1 0.00000 0.00000 0.00000 0.00000 0.00000 0.00000
   2 -11   9  108.66    3.29   2 0.00000 0.00000 0.00000 0.00000 0.00000 0.00000
 -10  11   6   79.41    4.59   2 0.00000 0.00000 0.00000 0.00000 0.00000 0.00000
 -11  11   7   13.53    3.07   2 0.00000 0.00000 0.00000 0.00000 0.00000 0.00000
   5  10  -8   69.95    8.40  -1 0.00000 0.00000 0.00000 0.00000 0.00000 0.00000
  -3  10   8   69.95    8.40   2 0.00000 0.00000 0.00000 0.00000 0.00000 0.00000
   4  10  -7    2.68    1.04   2 0.00000 0.00000 0.00000 0.00000 0.00000 0.00000
   3  10  -6   21.22    1.88   2 0.00000 0.00000 0.00000 0.00000 0.00000 0.00000
   2  10  -5  177.21    4.32   2 0.00000 0.00000 0.00000 0.00000 0.00000 0.00000
   1  10  -4    9.47    1.59   2 0.00000 0.00000 0.00000 0.00000 0.00000 0.00000
   0  10  -3    8.09    3.02  -1 0.00000 0.00000 0.00000 0.00000 0.00000 0.00000
  -2  10   1    8.09    3.02   2 0.00000 0.00000 0.00000 0.00000 0.00000 0.00000
  -1  10  -2  163.08    4.35  -1 0.00000 0.00000 0.00000 0.00000 0.00000 0.00000
  -2  10   0  163.08    4.35   2 0.00000 0.00000 0.00000 0.00000 0.00000 0.00000
  -2  10  -1   55.72    3.41  -1 0.00000 0.00000 0.00000 0.00000 0.00000 0.00000
  -2  10  -1   55.72    3.41   2 0.00000 0.00000 0.00000 0.00000 0.00000 0.00000
  -3  10   0  639.40    9.65   2 0.00000 0.00000 0.00000 0.00000 0.00000 0.00000
  -4  10   1  164.50    4.53   2 0.00000 0.00000 0.00000 0.00000 0.00000 0.00000
  -5  10   2   89.56    3.77   2 0.00000 0.00000 0.00000 0.00000 0.00000 0.00000
  -6  10   3  306.40    6.53   2 0.00000 0.00000 0.00000 0.00000 0.00000 0.00000
  -7  10   4   57.53    3.65   2 0.00000 0.00000 0.00000 0.00000 0.00000 0.00000
  -8  10   5   22.71    3.06  -1 0.00000 0.00000 0.00000 0.00000 0.00000 0.00000
   1 -10   9   22.71    3.06   2 0.00000 0.00000 0.00000 0.00000 0.00000 0.00000
  -9  10   6  129.88    3.20  -1 0.00000 0.00000 0.00000 0.00000 0.00000 0.00000
   1 -10  10  129.88    3.20   2 0.00000 0.00000 0.00000 0.00000 0.00000 0.00000
 -10  10   7  124.37    4.16  -1 0.00000 0.00000 0.00000 0.00000 0.00000 0.00000
   1 -10  11  124.37    4.16   2 0.00000 0.00000 0.00000 0.00000 0.00000 0.00000
 -12  10   9   60.95    4.88   2 0.00000 0.00000 0.00000 0.00000 0.00000 0.00000
   7   9  -9  121.60    3.56   2 0.00000 0.00000 0.00000 0.00000 0.00000 0.00000
   6   9  -8   38.93    6.71  -1 0.00000 0.00000 0.00000 0.00000 0.00000 0.00000
  -2   9   8   38.93    6.71   2 0.00000 0.00000 0.00000 0.00000 0.00000 0.00000
   5   9  -7   49.99    5.27  -1 0.00000 0.00000 0.00000 0.00000 0.00000 0.00000
  -2   9   7   49.99    5.27   2 0.00000 0.00000 0.00000 0.00000 0.00000 0.00000
   4   9  -6   95.24    6.95  -1 0.00000 0.00000 0.00000 0.00000 0.00000 0.00000
  -2   9   6   95.24    6.95   2 0.00000 0.00000 0.00000 0.00000 0.00000 0.00000
   3   9  -5   31.59    2.03   2 0.00000 0.00000 0.00000 0.00000 0.00000 0.00000
   2   9  -4  143.40    2.87   2 0.00000 0.00000 0.00000 0.00000 0.00000 0.00000
   1   9  -3   97.39    3.01   2 0.00000 0.00000 0.00000 0.00000 0.00000 0.00000
   0   9  -2   43.97    2.42   2 0.00000 0.00000 0.00000 0.00000 0.00000 0.00000
  -1   9  -1    2.97    1.27   2 0.00000 0.00000 0.00000 0.00000 0.00000 0.00000
  -2   9   0   84.17    3.78  -1 0.00000 0.00000 0.00000 0.00000 0.00000 0.00000
  -1   9  -2   84.17    3.78   2 0.00000 0.00000 0.00000 0.00000 0.00000 0.00000
  -3   9   1  155.03    3.01  -1 0.00000 0.00000 0.00000 0.00000 0.00000 0.00000
  -1   9  -3  155.03    3.01   2 0.00000 0.00000 0.00000 0.00000 0.00000 0.00000
  -4   9   2  563.49    6.63  -1 0.00000 0.00000 0.00000 0.00000 0.00000 0.00000
  -1   9  -4  563.49    6.63   2 0.00000 0.00000 0.00000 0.00000 0.00000 0.00000
  -5   9   3  286.30    5.84   2 0.00000 0.00000 0.00000 0.00000 0.00000 0.00000
  -6   9   4  285.50    6.14   2 0.00000 0.00000 0.00000 0.00000 0.00000 0.00000
  -7   9   5   27.50    3.15   2 0.00000 0.00000 0.00000 0.00000 0.00000 0.00000
  -8   9   6    0.05    1.94   2 0.00000 0.00000 0.00000 0.00000 0.00000 0.00000
  -9   9   7  110.84    4.73   2 0.00000 0.00000 0.00000 0.00000 0.00000 0.00000
 -10   9   8   50.73    3.50  -1 0.00000 0.00000 0.00000 0.00000 0.00000 0.00000
   0  -9  12   50.73    3.50   2 0.00000 0.00000 0.00000 0.00000 0.00000 0.00000
[truncated: 278,753 more chars]
